# Supplementary material
Source: publisher figshare collection journal article supplement (https://acs.figshare.com/ndownloader/files/25641438)
Supplement: Supplementary file 1 [file 25641438]

## Sheet: PeptideGroups
Table S4. DDA-MS peptide list. List of peptides identified in all samples by DDA-MS.
														ID (PD2.3)	F1	F2	F3	F4	F5	F6	F7	F8	F9	F10	F12	F13	F14	F15	F16	F18	F19	F21	F22	F23	F24	F25	F26	F27	F28	F29	F30	F31	F32	F33	F34	F35	F36	F37	F38
														Sample ID	PM774	PM1072	PM491	PM702	PM262	PM207	PM750	PM174	PM603	PM1081	PM319	PM502	PM341	PM493	PM478	PM222	PM1093	PM1075	PM288	Pool2	PM357	PM291	PM421	PM1525	PM297	PM887	PM256	PM183	Pool2	PM460	PM1123	PM282	PM198	PM386	PM732
Confidence	Sequence	Annotated Sequence	Modifications	Qvality PEP	Qvality q-value	# Protein Groups	# Proteins	# PSMs	Master Protein Accessions	Positions in Master Proteins	Modifications in Master Proteins	# Missed Cleavages	Theo. MH+ [Da]	Sequence Length	Abundances (Normalized): F1: Sample	Abundances (Normalized): F2: Sample	Abundances (Normalized): F3: Sample	Abundances (Normalized): F4: Sample	Abundances (Normalized): F5: Sample	Abundances (Normalized): F6: Sample	Abundances (Normalized): F7: Sample	Abundances (Normalized): F8: Sample	Abundances (Normalized): F9: Sample	Abundances (Normalized): F10: Sample	Abundances (Normalized): F12: Sample	Abundances (Normalized): F13: Sample	Abundances (Normalized): F14: Sample	Abundances (Normalized): F15: Sample	Abundances (Normalized): F16: Sample	Abundances (Normalized): F18: Sample	Abundances (Normalized): F19: Sample	Abundances (Normalized): F21: Sample	Abundances (Normalized): F22: Sample	Abundances (Normalized): F23: Sample	Abundances (Normalized): F24: Sample	Abundances (Normalized): F25: Sample	Abundances (Normalized): F26: Sample	Abundances (Normalized): F27: Sample	Abundances (Normalized): F28: Sample	Abundances (Normalized): F29: Sample	Abundances (Normalized): F30: Sample	Abundances (Normalized): F31: Sample	Abundances (Normalized): F32: Sample	Abundances (Normalized): F33: Sample	Abundances (Normalized): F34: Sample	Abundances (Normalized): F35: Sample	Abundances (Normalized): F36: Sample	Abundances (Normalized): F37: Sample	Abundances (Normalized): F38: Sample
High	INSDGSSTSYADSVK	[R].INSDGSSTSYADSVK.[G]		1.55716e-10	0.000386037	1	1	143	A0A0B4J1X5	A0A0B4J1X5 [70-84]		0	1530.69	15	846912	469892		1.05601e+06	364543	971125	774878	584182	7.34879e+06	1.36702e+06	727069	1.73935e+06	450577	552940	503809	372818	646096	2.20426e+06	338497	1.6121e+06	1.24241e+06	683948	697181	1.40123e+06	422245	1.43859e+06	669013	2.10488e+06	1.97572e+06	1.43068e+06	908873	422632	450217	1.25576e+06	1.3755e+06
High	NTLYLQMNSLK	[K].NTLYLQMNSLK.[T]	1xOxidation [M7]	8.40617e-05	0.000386037	1	1	267	A0A0B4J1V0	A0A0B4J1V0 [98-108]		0	1340.69	11	1.23956e+07	9.87431e+06	1.4444e+07	7.20945e+06	8.09383e+06	1.05436e+07	8.5809e+06	9.72418e+06	6.07157e+06	1.03124e+07	1.06689e+07	1.09191e+07	3.2578e+06	6.57532e+06	5.41965e+06	5.04629e+06	1.16054e+07	3.47112e+06	8.63542e+06	7.82087e+06	1.13537e+07	7.67934e+06	1.01562e+07	6.93565e+06	5.7267e+06	7.6436e+06	1.05049e+07	5.64903e+06	1.30884e+07	1.45763e+07	6.00434e+06	1.28328e+07	1.23797e+07	1.15901e+07	1.20629e+07
High	NTLYLQMNSLR	[K].NTLYLQMNSLR.[A]		1.0302e-06	0.000386037	4	6	207	P01768; A0A0B4J1X5; P01764; P01767	P01768 [96-106]; A0A0B4J1X5 [96-106]; P01764 [96-106]; P01767 [95-105]		0	1352.7	11	2.74308e+06	4.42375e+06	2.37216e+06	3.77086e+06	6.07859e+06	4.44081e+06	5.388e+06	6.56794e+06	5.91741e+06	9.44764e+06	7.44073e+06	6.10815e+06	2.25067e+06	5.22926e+06	3.84095e+06	4.91256e+06	3.69176e+06	4.95202e+06	3.81002e+06	8.12427e+06	7.04227e+06	3.81873e+06	5.64967e+06	4.42972e+06	2.46108e+06	7.03554e+06	5.90051e+06	3.52528e+06	5.52771e+06	6.80504e+06	3.7209e+06	7.02882e+06	8.03407e+06	4.88685e+06	5.73575e+06
High	NTLYLQMNSLR	[K].NTLYLQMNSLR.[A]	1xOxidation [M7]	4.41778e-05	0.000386037	4	6	329	P01768; A0A0B4J1X5; P01764; P01767	P01768 [96-106]; A0A0B4J1X5 [96-106]; P01764 [96-106]; P01767 [95-105]		0	1368.69	11	1.87172e+07	3.33862e+07	3.1497e+07	2.29527e+07	2.98954e+07	2.26814e+07	3.01963e+07	3.02211e+07	3.48535e+07	5.4123e+07	3.19884e+07	3.99955e+07	1.31662e+07	2.86995e+07	1.67946e+07	3.57563e+07	2.7482e+07	2.80089e+07	2.05905e+07	2.66144e+07	3.82294e+07	2.0398e+07	2.89117e+07	2.14272e+07	1.51807e+07	5.1017e+07	2.77295e+07	1.6672e+07	4.66302e+07	3.99826e+07	3.27422e+07	3.48155e+07	4.17001e+07	2.47742e+07	3.09967e+07
High	NTWSILHTQGALVQGGYGHSSVYDHR	[K].NTWSILHTQGALVQGGYGHSSVYDHR.[T]		0.00102141	0.000386037	1	1	1	O75882	O75882 [485-510]		0	2883.39	26									267352	764762															260873								431478
High	NVAFVIDISGSMAGR	[K].NVAFVIDISGSMAGR.[K]	1xOxidation [M12]	5.89213e-09	0.000386037	1	1	132	Q06033	Q06033 [284-298]		0	1552.78	15	589125	853016	1.2566e+06	1.89276e+06	832792	792356	1.41527e+06	833727	674466	1.08059e+06	1.23931e+06	717518	454421	775810	789215	1.09352e+06	1.05089e+06	1.01662e+06	786427	820803	972011	863023	1.55792e+06	1.5507e+06	1.14082e+06	1.56557e+06	996096	879441	645165	1.24314e+06	973569	732457	555091	632006	1.65658e+06
High	NVALVSGDTENAK	[R].NVALVSGDTENAK.[G]		6.47876e-07	0.000386037	1	1	145	Q16610	Q16610 [506-518]		0	1317.66	13	1.94671e+06	1.58268e+06	3.14115e+06	1.12562e+06	1.50026e+06	1.39057e+06	1.29472e+06	1.51711e+06	1.89658e+06	1.06568e+06	1.18961e+06	1.69031e+06	1.25848e+06	1.20598e+06	1.13693e+06	1.84871e+06	1.29481e+06	1.55308e+06	1.34386e+06	1.61161e+06	1.30629e+06	1.67861e+06	1.49839e+06	1.36582e+06	1.08061e+06	834530	1.80774e+06	985568	1.36984e+06	1.07602e+06	1.39642e+06	1.58189e+06	1.15854e+06	785558	1.20678e+06
High	NVMYFNGNSDASTIK	[R].NVMYFNGNSDASTIK.[E]	1xOxidation [M3]	1.90493e-07	0.000386037	1	1	55	P12259	P12259 [2014-2028]		0	1676.76	15	1.03629e+06	318602	244205	159986	263920	319868		305114	283633	198188	249006	269851	210086	303197	258710	290147	156556	295228	474481	198808	146525	333534	322596	424991	189039	346068	212758	189191	294851	187631	409310	253790	231587	355295	366099
High	NVPLPVIAELPPK	[K].NVPLPVIAELPPK.[V]		1.32345e-06	0.000386037	1	1	2011	P01871	P01871 [100-112]		0	1386.84	13	9.16836e+07	1.044e+08	1.02334e+08	8.17469e+07	6.08714e+07	1.75415e+08	6.6973e+07	7.57034e+07	1.42953e+08	1.37818e+08	4.80152e+07	4.85855e+07	1.11227e+08	3.22509e+07	9.82101e+07	3.88442e+07	6.0157e+07	1.80998e+07	5.92978e+07	1.15676e+08	1.28098e+08	3.43809e+07	1.91005e+08	8.20335e+07	8.79317e+07	5.89384e+07	9.6736e+07	3.23636e+07	1.05761e+08	1.27313e+08	6.89871e+07	2.05539e+07	5.11514e+07	1.19034e+08	6.39732e+07
High	NVQALEIELQSQLALK	[R].NVQALEIELQSQLALK.[Q]		1.19039e-12	0.000386037	1	1	63	P13645	P13645 [371-386]		0	1797.01	16		823637	1.53837e+06	606284	4.18087e+06	3.6583e+06	854329	147116	656901	1.84229e+06	2.40408e+06	571152	64637.1	867716	322771			775741	1.49806e+06	284454	916686	979404	232876	209602									340357
High	NVQDAIADAEQR	[K].NVQDAIADAEQR.[G]		1.85246e-06	0.000386037	1	1	24	P35908	P35908 [419-430]		0	1329.64	12	1.02072e+06	634105	1.14045e+06	642525	5.5894e+06	1.8032e+06	603901		847349	579459	1.72825e+06	908462	354831	542066	550214		447494	513619	1.62933e+06	537135	296938	343979	351150	489779		447924	173305		207626		244922		673428	228239	266244
High	NVQDAIADAEQRGEHALK	[K].NVQDAIADAEQRGEHALK.[D]		6.51061e-06	0.000386037	1	1	34	P35908	P35908 [419-436]		1	1964.98	18	397451	326521	1.1101e+06	525275	5.75611e+06	2.2809e+06	307880		623629	461098	3.59663e+06	709921		671752	172842		138581	394818	991542	224348	347587	240535	182594				243402				264780		697712		121959
High	NVQFNYPHTSVTDVTQNNFHNYFGGSEIVVAGK	[R].NVQFNYPHTSVTDVTQNNFHNYFGGSEIVVAGK.[F]		2.40497e-16	0.000386037	1	1	438	P19823	P19823 [500-532]		0	3683.75	33	2.46053e+07	2.43299e+07	3.42894e+07	3.14017e+07	2.03954e+07	2.97293e+07	3.72086e+07	3.55967e+07	3.27941e+07	3.43952e+07	3.40294e+07	3.04639e+07	3.38826e+07	3.10095e+07	3.10075e+07	3.26279e+07	3.60751e+07	3.97626e+07	3.31204e+07	3.55009e+07	2.99257e+07	2.29595e+07	3.97425e+07	3.06283e+07	3.0921e+07	4.39311e+07	3.6936e+07	3.94109e+07	2.11769e+07	3.61718e+07	2.93166e+07	3.13236e+07	3.43868e+07	2.23527e+07	3.82915e+07
High	NVSTGDVNVEMNAAPGVDLTQLLNNMR	[R].NVSTGDVNVEMNAAPGVDLTQLLNNMR.[S]	1xOxidation [M]	7.23352e-09	0.000386037	1	1	18	P13645	P13645 [296-322]		0	2888.39	27	177918		330756		2.46843e+06	1.77249e+06			138094	577393	1.96477e+06	204361		310877					198806	411298	270560					180858	655036
High	NVSTGDVNVEMNAAPGVDLTQLLNNMR	[R].NVSTGDVNVEMNAAPGVDLTQLLNNMR.[S]	2xOxidation [M11; M26]	8.56108e-12	0.000386037	1	1	13	P13645	P13645 [296-322]		0	2904.38	27	1.19373e+06		2.73257e+06		2.83478e+06	1.87942e+06				1.28085e+06	1.68654e+06	490084		855172
High	NVVFVIDISGSMR	[K].NVVFVIDISGSMR.[G]		0.00597666	0.000386037	1	1	2	P19827	P19827 [292-304]		0	1436.76	13		113124	122260	512069	80383	295000		327611	197407	386226	320799	70639.1	124846	253232	222554	185483	192216	226098	207370	242388	258757	152823		375043	262622	160231	362718	317879		153332	253335		214492	311618	279729
High	NVVFVIDISGSMR	[K].NVVFVIDISGSMR.[G]	1xOxidation [M12]	2.0783e-06	0.000386037	1	1	366	P19827	P19827 [292-304]		0	1452.75	13	69985.1	220334	924913	745395	163033	653552	452206	766495	625303	1.08818e+06	406228		380927	461321	324294	608646	532551	362443	378305	693480	171121	128785	557001	403792	808694	951027	744720	396896	62559.1	742529	268076		193563	181504	425454
High	NWETEITAQPDGGK	[K].NWETEITAQPDGGK.[T]		6.95637e-09	0.000386037	1	1	343	P05452	P05452 [156-169]		0	1545.72	14	4.60109e+06	4.11171e+06	3.85679e+06	4.04726e+06	5.6678e+06	3.7272e+06	5.48749e+06	3.45832e+06	4.24581e+06	7.22338e+06	4.59138e+06	5.47055e+06	5.88665e+06	5.94733e+06	4.86606e+06	5.97111e+06	5.9677e+06	5.79204e+06	4.99168e+06	4.94853e+06	4.6995e+06	5.79448e+06	7.06212e+06	5.89863e+06	4.75556e+06	5.72532e+06	4.35716e+06	4.00919e+06	5.99369e+06	3.11791e+06	5.79993e+06	6.06165e+06	6.10823e+06	5.04119e+06	4.05599e+06
High	NTLYLQMNSLK	[K].NTLYLQMNSLK.[T]		8.47721e-06	0.000386037	1	1	105	A0A0B4J1V0	A0A0B4J1V0 [98-108]		0	1324.69	11	4.27197e+06	3.32902e+06	2.49006e+06	2.84377e+06	3.39348e+06	3.77428e+06	4.10188e+06	4.74857e+06	541121	3.80358e+06	4.17769e+06	5.32915e+06		3.44129e+06	785308	3.24456e+06	3.50857e+06	556904	3.41163e+06	4.19156e+06	4.38164e+06	5.39236e+06	5.37951e+06	3.82054e+06	2.8465e+06	3.24063e+06	3.89317e+06	497392	869266	5.77713e+06	2.97879e+06	4.23726e+06	3.80448e+06	5.80649e+06	5.26276e+06
High	NTLYLQMGSLR	[K].NTLYLQMGSLR.[A]	1xOxidation [M7]	0.010667	0.000386037	1	1	50	A0A075B6Q5	A0A075B6Q5 [97-107]		0	1311.67	11	864161	1.14668e+06	2.0515e+06	813819	1.18328e+06	662531	462690	1.7426e+06	510735	1.0923e+06	899166	2.34093e+06	371283	651053	434422	811783	587181	623927	728241	1.00243e+06	1.3005e+06	743198	779664	589354	1.53547e+06		750739	541414	1.85831e+06	527490	1.7323e+06	1.90241e+06	1.63521e+06	962476	718054
High	NTLIIYLDK	[R].NTLIIYLDK.[V]		0.00201725	0.000386037	1	1	736	P01024	P01024 [1442-1450]		0	1092.63	9	1.00281e+08	1.15962e+08	1.0501e+08	1.01515e+08	1.39633e+08	1.26724e+08	1.07508e+08	9.2344e+07	1.01392e+08	1.34244e+08	1.12344e+08	1.05904e+08	1.2175e+08	1.45328e+08	1.21531e+08	1.46932e+08	1.178e+08	1.22194e+08	1.43585e+08	1.02743e+08	1.12105e+08	1.07507e+08	7.21708e+07	1.22514e+08	1.54218e+08	1.06739e+08	1.38634e+08	1.21898e+08	1.08656e+08	1.16935e+08	9.39296e+07	8.33937e+07	1.02447e+08	9.31588e+07	9.50015e+07
High	NTLELSNGVIVK	[K].NTLELSNGVIVK.[I]		5.23527e-07	0.000386037	1	1	220	P04114	P04114 [2865-2876]		0	1286.73	12	7.53224e+06	1.56131e+07	1.39482e+07	1.25693e+07	9.80188e+06	1.40641e+07	7.1029e+06	1.50327e+07	1.39415e+07	1.16589e+07	9.84638e+06	7.93278e+06	1.66303e+07	1.75911e+07	1.34467e+07	1.27165e+07	1.30249e+07	1.24937e+07	1.03068e+07	1.03733e+07	1.21095e+07	1.53987e+07	1.15813e+07	7.98928e+06	6.39179e+06	1.02229e+07	1.18159e+07	1.84678e+07	1.15997e+07	5.76195e+06	1.43887e+07	1.43934e+07	9.20628e+06	1.17588e+07	1.17e+07
High	NSEEFAAAMSR	[K].NSEEFAAAMSR.[Y]	1xOxidation [M9]	6.63475e-06	0.000386037	1	1	346	P04114	P04114 [118-128]		0	1228.53	11	1.72686e+07	2.95487e+07	3.17644e+07	2.63711e+07	2.75952e+07	3.38293e+07	2.02524e+07	3.71116e+07	2.86646e+07	2.48044e+07	1.89812e+07	2.29931e+07	3.70995e+07	2.27204e+07	4.55412e+07	2.81568e+07	2.71418e+07	2.16674e+07	4.62126e+07	2.87699e+07	2.69674e+07	3.18892e+07	2.5019e+07	1.76168e+07	2.35932e+07	2.90878e+07	3.16227e+07	2.49694e+07	3.8103e+07	1.9633e+07	2.77267e+07	2.75272e+07	1.59446e+07	3.63406e+07	2.30732e+07
High	NSGLTEEEAK	[K].NSGLTEEEAK.[H]		3.61642e-06	0.000386037	1	1	182	P13671	P13671 [388-397]		0	1077.51	10	3.8535e+06	2.69019e+06	3.17463e+06	3.6226e+06	3.01063e+06	3.02138e+06	2.59387e+06	2.59676e+06	3.30445e+06	2.59416e+06	3.35536e+06	3.65868e+06	2.30707e+06	3.06757e+06	1.45327e+06	2.9395e+06	3.58531e+06	2.62825e+06	3.20109e+06	2.54942e+06	2.58919e+06	4.02147e+06	3.32943e+06	2.95044e+06	2.93837e+06	3.27741e+06	3.23492e+06	2.47689e+06	2.87109e+06	3.10053e+06	2.16025e+06	2.19424e+06	2.48469e+06	2.52214e+06	2.76336e+06
High	NSLFEYQK	[K].NSLFEYQK.[N]		0.0114834	0.000386037	1	1	682	P02671	P02671 [90-97]		0	1028.5	8	4.9349e+08	2.58822e+08	4.36106e+08	3.51618e+08	2.13299e+08	2.60675e+08	2.81954e+08	2.2744e+08	3.25106e+08	2.38463e+08	3.08028e+08	2.7464e+08	2.31816e+08	2.88369e+08	2.63941e+08	3.05066e+08	4.07202e+08	2.89974e+08	2.75202e+08	2.04012e+08	2.31388e+08	3.06052e+08	2.60757e+08	3.12418e+08	2.59621e+08	2.54204e+08	1.8696e+08	2.62546e+08	2.99807e+08	2.69136e+08	2.78611e+08	2.88208e+08	3.63367e+08	1.26606e+08	3.4848e+08
High	NSLFFSAQPFEITASTNNEGNLK	[K].NSLFFSAQPFEITASTNNEGNLK.[V]		4.75309e-17	0.000386037	1	1	227	P04114	P04114 [3035-3057]		0	2529.23	23	5.20821e+06	1.04493e+07	1.03838e+07	9.17083e+06	8.72529e+06	1.49434e+07	5.75707e+06	1.16312e+07	1.07841e+07	1.05908e+07	7.86721e+06	3.9569e+06	1.40862e+07	1.42212e+07	1.41982e+07	9.80229e+06	9.5616e+06	8.43214e+06	9.56277e+06	8.97745e+06	9.54686e+06	1.06468e+07	7.01064e+06	5.40205e+06	5.60002e+06	1.0799e+07	1.44329e+07	1.2387e+07	7.14811e+06	4.95127e+06	8.32072e+06	9.54969e+06	5.94903e+06	1.09666e+07	9.78059e+06
High	NSLLGMEGANSIFSGFLLFPDMEA	[K].NSLLGMEGANSIFSGFLLFPDMEA.[-]	2xOxidation [M6; M22]	4.64957e-10	0.000386037	1	1	107	P02746	P02746 [230-253]		0	2592.2	24	689136	1.36966e+06	962300	1.11649e+06	1.49133e+06	1.34322e+06	1.75047e+06	1.14113e+06	880898	1.48333e+06	1.92775e+06	712847	1.54876e+06	1.284e+06	1.51656e+06	1.4218e+06	1.50571e+06	1.67178e+06	1.35632e+06	1.22686e+06	1.95211e+06	1.5456e+06	1.19256e+06	1.46458e+06	1.8207e+06	1.88787e+06	2.24542e+06	1.82015e+06	1.10639e+06	1.42156e+06	1.19128e+06	1.10091e+06	859112	1.58685e+06	1.79147e+06
High	NSITLTNLTPGTEYVVSIVALNGR	[R].NSITLTNLTPGTEYVVSIVALNGR.[E]		3.64242e-18	0.000386037	1	1	325	P02751	P02751 [1411-1434]		0	2532.37	24	1.39453e+06	2.82377e+06	5.28116e+06	4.11709e+06	1.38619e+06	3.91993e+06	3.71234e+06	3.89124e+06	3.01208e+06	4.07912e+06	2.82653e+06	1.31187e+06	2.21386e+06	2.91034e+06	3.06738e+06	2.76821e+06	2.63227e+06	4.50531e+06	2.66337e+06	4.28077e+06	3.31188e+06	2.64746e+06	880097	3.77009e+06	3.00794e+06	5.0528e+06	2.28087e+06	3.3212e+06	1.57954e+06	2.07012e+06	4.11626e+06	2.65877e+06	2.56282e+06	1.16462e+06	4.08339e+06
High	NSITLTNLTPGTEYVVSIVALNGREESPLLIGQQSTVSDVPR	[R].NSITLTNLTPGTEYVVSIVALNGREESPLLIGQQSTVSDVPR.[D]		4.18622e-13	0.000386037	1	1	67	P02751	P02751 [1411-1452]		1	4468.36	42		1.29144e+06	2.59497e+06	1.51707e+06	635817	1.55328e+06	468778	1.55824e+06	1.27015e+06	2.11635e+06	1.8264e+06		1.01246e+06	871161	1.27537e+06	689143	1.26394e+06	1.9679e+06	489971	1.82187e+06	1.57999e+06	1.39377e+06		1.32951e+06	902327	3.4971e+06	1.26461e+06	2.46373e+06	663156	730611	1.55402e+06	980769	974307	912086	2.00933e+06
High	NSLYLQMNSLK	[K].NSLYLQMNSLK.[T]		9.87996e-05	0.000386037	1	1	36	A0A0B4J1Y9	A0A0B4J1Y9 [98-108]		0	1310.68	11	1.05211e+06	390225		802518	871113	613131	813621	1.42842e+06	463040	1.02958e+06	1.45274e+06	1.74638e+06		466664	254046	394840	2.82881e+06	135891	251087	2.23059e+06	479144	261619	1.44926e+06	632844	892059	743155	683340	540985	1.8606e+06	2.74991e+06	908869		1.05792e+06	1.44756e+06	2.16507e+06
High	NWGLSFYADKPETTK	[K].NWGLSFYADKPETTK.[E]		1.43662e-11	0.000386037	1	1	516	P19652	P19652 [139-153]		0	1756.85	15	1.01351e+07	1.2811e+07	1.03417e+07	1.10283e+07	9.61351e+06	1.73109e+07	1.12292e+07	1.88453e+07	1.99423e+07	2.4501e+07	1.15896e+07	1.01479e+07	2.18315e+07	1.14009e+07	1.33931e+07	2.21067e+07	1.52228e+07	1.01994e+07	2.48348e+07	2.21242e+07	2.70083e+07	2.09763e+07	9.74524e+06	2.15039e+07	1.25153e+07	3.25221e+07	1.60884e+07	2.05358e+07	1.74949e+07	1.03659e+07	1.3627e+07	2.29611e+07	1.54623e+07	2.27342e+07	1.4576e+07
High	NSLYLQMNSLK	[K].NSLYLQMNSLK.[T]	1xOxidation [M7]	0.000185625	0.000386037	1	1	220	A0A0B4J1Y9	A0A0B4J1Y9 [98-108]		0	1326.67	11	5.64101e+06	6.24665e+06	3.08325e+06	4.18381e+06	4.39493e+06	3.80753e+06	3.59662e+06	5.52296e+06	2.68022e+06	4.89226e+06	6.41005e+06	5.50635e+06		2.9963e+06	2.3964e+06	4.28459e+06	1.61804e+07	2.17986e+06	4.37449e+06	6.99495e+06	3.52037e+06	2.25498e+06	5.83979e+06	2.6033e+06	4.14099e+06	5.86615e+06	5.37736e+06	2.79778e+06	1.06346e+07	9.23243e+06	4.91585e+06	2.52037e+06	4.90347e+06	5.13571e+06	7.65754e+06
High	NSLYLQMNSLR	[K].NSLYLQMNSLR.[AT]	1xOxidation [M7]	1.38007e-05	0.000386037	5	7	356	P01782; A0A0B4J1X8; P01780; A0A0B4J1V1; P01762	P01782 [96-106]; A0A0B4J1X8 [96-106]; P01780 [96-106]; A0A0B4J1V1 [96-106]; P01762 [96-106]		0	1354.68	11	8.99218e+06	1.99445e+07	2.03506e+07	1.3838e+07	1.765e+07	1.30664e+07	1.64783e+07	1.38404e+07	1.35649e+07	2.41812e+07	1.88113e+07	1.87528e+07	7.74765e+06	1.48803e+07	1.2293e+07	1.50958e+07	1.55077e+07	9.32365e+06	1.24819e+07	1.74773e+07	1.587e+07	7.91331e+06	1.24999e+07	8.87681e+06	1.01479e+07	2.55875e+07	1.69378e+07	1.00155e+07	2.25255e+07	1.58828e+07	1.56441e+07	2.21423e+07	2.57144e+07	1.68777e+07	2.39012e+07
High	NSMVLDVAFVLEGSDK	[R].NSMVLDVAFVLEGSDK.[I]	1xOxidation [M3]	6.82534e-06	0.000386037	1	1	1	P04275	P04275 [1493-1508]		0	1739.85	16																												125898		190225
High	NSVDELNNNVEAVSQTSSSSFQYMYLLK	[R].NSVDELNNNVEAVSQTSSSSFQYMYLLK.[D]		1.17313e-18	0.000386037	1	1	381	P02675	P02675 [125-152]		0	3167.48	28	5.34391e+07	3.97595e+07	4.76341e+07	8.39759e+07	3.6013e+07	5.65693e+07	5.6094e+07	4.85256e+07	6.3465e+07	4.11999e+07	5.63615e+07	4.22081e+07	6.02415e+07	4.5341e+07	5.2683e+07	5.50445e+07	6.88367e+07	5.52631e+07	5.02317e+07	6.66782e+07	5.16279e+07	7.11173e+07	5.89599e+07	5.53183e+07	4.91493e+07	4.40422e+07	6.33765e+07	5.73462e+07	3.46612e+07	5.4511e+07	3.9778e+07	4.53356e+07	6.29253e+07	3.69813e+07	6.98452e+07
High	NSVDELNNNVEAVSQTSSSSFQYMYLLK	[R].NSVDELNNNVEAVSQTSSSSFQYMYLLK.[D]	1xOxidation [M24]	5.82097e-18	0.000386037	1	1	736	P02675	P02675 [125-152]		0	3183.48	28	7.637e+07	5.55862e+07	9.14676e+07	8.10751e+07	3.3272e+07	5.52393e+07	5.26489e+07	4.20931e+07	6.01994e+07	3.97972e+07	6.44605e+07	5.11423e+07	3.58685e+07	5.63443e+07	4.69098e+07	6.67168e+07	8.42144e+07	5.85458e+07	5.14671e+07	4.50111e+07	3.32857e+07	3.86248e+07	4.40711e+07	5.89367e+07	3.71223e+07	3.87036e+07	5.98589e+07	5.07021e+07	3.54741e+07	4.39514e+07	4.18664e+07	4.12693e+07	5.27167e+07	1.86711e+07	6.23564e+07
High	NTAYLQMNSLK	[K].NTAYLQMNSLK.[T]	1xOxidation [M7]	0.000231176	0.000386037	1	1	98	A0A0B4J1V6	A0A0B4J1V6 [98-108]		0	1298.64	11			217698																					199181		199129		146951					344797
High	NTEILTGSWSDQTYPEGTQAIYK	[R].NTEILTGSWSDQTYPEGTQAIYK.[C]		7.35864e-18	0.000386037	1	1	327	P08603	P08603 [29-51]		0	2602.23	23	1.48875e+07	1.0635e+07	1.10369e+07	1.09199e+07	1.28996e+07	8.05865e+06	1.1163e+07	1.23365e+07	1.34215e+07	1.36634e+07	1.10868e+07	1.31204e+07	1.00567e+07	1.02242e+07	1.07215e+07	1.3099e+07	1.0481e+07	1.0578e+07	1.23017e+07	1.04916e+07	1.41195e+07	1.32981e+07	9.78194e+06	1.28912e+07	1.12171e+07	1.01614e+07	1.31544e+07	1.28916e+07	9.616e+06	8.98036e+06	8.29374e+06	7.68885e+06	1.17054e+07	1.03724e+07	1.08619e+07
High	NTEQEEGGEAVHEVEVVIK	[R].NTEQEEGGEAVHEVEVVIK.[H]		7.74557e-13	0.000386037	1	1	124	P00742	P00742 [292-310]		0	2096.01	19	1.7098e+06	2.05978e+06	2.73642e+06	2.96866e+06	2.72311e+06	3.74091e+06	2.47109e+06	3.1605e+06	1.45438e+06	4.23163e+06	2.34585e+06	2.85191e+06	3.59194e+06	3.55011e+06	3.34806e+06	4.02814e+06	2.32118e+06	3.58688e+06	4.21353e+06	3.35743e+06	3.27245e+06	3.79458e+06	3.20943e+06	4.59186e+06	4.54861e+06	3.59539e+06	1.29592e+06	3.6294e+06	3.65182e+06	3.01014e+06	3.35356e+06	2.54997e+06	2.65121e+06	3.37103e+06	2.80289e+06
High	NTFAEVTGLSPGVTYYFK	[R].NTFAEVTGLSPGVTYYFK.[V]		7.00774e-14	0.000386037	1	1	208	P02751	P02751 [959-976]		0	1993.99	18	2.70891e+07	1.47542e+07	5.50737e+07	2.24003e+07	1.10717e+07	2.28719e+07	2.50122e+07	2.00629e+07	2.31013e+07	2.32e+07	1.99123e+07	1.66131e+07	1.8161e+07	1.72991e+07	1.72907e+07	1.35909e+07	2.64852e+07	2.4739e+07	1.34806e+07	2.4578e+07	2.07289e+07	2.25987e+07	1.11087e+07	2.10873e+07	1.70407e+07	2.03478e+07	1.46053e+07	3.17174e+07	2.22288e+07	1.9954e+07	2.94998e+07	2.2369e+07	2.44107e+07	1.35384e+07	2.48368e+07
High	NSLYLQMNSLR	[K].NSLYLQMNSLR.[AT]		2.69084e-06	0.000386037	5	7	146	P01782; A0A0B4J1X8; P01780; A0A0B4J1V1; P01762	P01782 [96-106]; A0A0B4J1X8 [96-106]; P01780 [96-106]; A0A0B4J1V1 [96-106]; P01762 [96-106]		0	1338.68	11	1.21331e+06	2.7375e+06	1.88726e+06	2.68074e+06	3.58681e+06	2.32153e+06	3.59412e+06	3.82105e+06	2.65416e+06	4.79317e+06	4.1478e+06	4.13582e+06	1.67237e+06	3.22653e+06	2.37749e+06	2.74008e+06	2.58707e+06	2.07835e+06	2.59616e+06	4.93872e+06	3.69207e+06	1.75296e+06	2.52207e+06	1.86108e+06	1.75544e+06	4.54043e+06	3.38419e+06	2.27482e+06	3.43789e+06	3.05874e+06	2.53934e+06	6.13418e+06	7.13626e+06	4.07334e+06	4.47115e+06
High	NSEEFAAAMSR	[K].NSEEFAAAMSR.[Y]		3.48127e-06	0.000386037	1	1	258	P04114	P04114 [118-128]		0	1212.53	11	4.02762e+06	6.22723e+06	5.37598e+06	5.79904e+06	6.78228e+06	1.08268e+07	6.45672e+06	1.38498e+07	9.7546e+06	7.64042e+06	5.21526e+06	7.02823e+06	9.34775e+06	8.53734e+06	1.25724e+07	6.48194e+06	6.33784e+06	6.88838e+06	6.17992e+06	9.88969e+06	7.72013e+06	1.14871e+07	7.04784e+06	6.94953e+06	5.31869e+06	4.52342e+06	6.85438e+06	8.32701e+06	5.57319e+06	4.61753e+06	4.91425e+06	8.81934e+06	6.03851e+06	1.30288e+07	8.03326e+06
High	NWGLSVYADKPETTK	[K].NWGLSVYADKPETTK.[E]		8.25314e-11	0.000386037	1	1	1221	P02763	P02763 [139-153]		0	1708.85	15	1.26561e+08	1.13813e+08	9.20118e+07	1.00256e+08	1.4487e+08	7.93907e+07	9.18401e+07	8.1907e+07	9.31451e+07	1.03049e+08	1.5878e+08	1.55439e+08	1.14347e+08	1.10557e+08	7.89417e+07	1.34225e+08	1.30166e+08	1.5422e+08	9.55216e+07	8.7058e+07	1.16311e+08	9.84944e+07	7.16034e+07	9.28442e+07	1.12202e+08	1.50164e+08	6.95609e+07	1.39768e+08	1.03893e+08	1.02732e+08	1.01941e+08	1.3046e+08	1.72346e+08	8.6742e+07	1.03687e+08
High	NYAEAKDVFLGMFLYEYAR	[K].NYAEAKDVFLGMFLYEYAR.[R]	1xOxidation [M12]	1.40607e-05	0.000386037	1	1	34	P02768	P02768 [342-360]		1	2316.1	19	356935					456202	542087		356116	530224	561597	408960				492332	523275	522065					599569			617548			583701	475831	664078	452676	431159	447041	648987
High	QEPGENSEILPTLK	[K].QEPGENSEILPTLK.[Y]		1.64585e-07	0.000386037	1	1	181	P22352	P22352 [107-120]		0	1554.8	14	2.26279e+06	3.12292e+06	2.11048e+06	2.06273e+06	1.68156e+06	1.81404e+06	2.53264e+06	1.96563e+06	2.21075e+06	1.50767e+06	2.45687e+06	2.07376e+06	2.50953e+06	2.56382e+06	2.00461e+06	1.86266e+06	2.31523e+06	1.91072e+06	1.17164e+06	1.80867e+06	1.66763e+06	1.70968e+06	3.1109e+06	2.21938e+06	1.96046e+06	2.03799e+06	1.25103e+06	1.94578e+06	2.64339e+06	2.60026e+06	1.98233e+06	2.04633e+06	2.07017e+06	2.0347e+06	1.3865e+06
High	QEPSQGTTTFAVTSILR	[R].QEPSQGTTTFAVTSILR.[V]		3.75978e-13	0.000386037	2	2	1126	P01876; P01877	P01876 [283-299]; P01877 [270-286]		0	1835.95	17	3.02617e+08	3.33036e+08	1.38111e+08	1.35852e+08	2.0246e+08	2.1866e+08	1.7151e+08	2.85172e+08	1.55487e+08	3.77176e+08	1.719e+08	2.28148e+08	1.56924e+08	1.06358e+08	2.86637e+08	1.56071e+08	8.19096e+07	1.18256e+08	1.77775e+08	2.37351e+08	1.56116e+08	1.70611e+08	1.63416e+08	1.87738e+08	1.00241e+08	1.8003e+08	2.60047e+08	1.44023e+08	1.97137e+08	8.89127e+07	2.83284e+08	2.99027e+08	1.97749e+08	1.86843e+08	1.79876e+08
High	QEYDESGPSIVHR	[K].QEYDESGPSIVHR.[K]		1.04587e-09	0.000386037	1	7	216	P60709	P60709 [360-372]		0	1516.7	13	4.45259e+06	4.547e+06	5.77863e+06	4.64185e+06	3.13752e+06	2.73795e+06	3.37313e+06	4.13909e+06	2.87416e+06	3.43689e+06	2.42689e+06	7.52315e+06	2.61814e+06	5.19962e+06	3.407e+06	3.55891e+06	6.31711e+06	9.34905e+06	3.18787e+06		2.64123e+06	4.19384e+06	2.94254e+06	4.82619e+06	1.93721e+06	2.60751e+06	3.70764e+06	8.96177e+06		3.45561e+06	5.23526e+06	5.28526e+06	6.17929e+06	1.06347e+06	3.54935e+06
High	QFPILLDFK	[K].QFPILLDFK.[T]		0.0062095	0.000386037	1	1	322	P05546	P05546 [229-237]		0	1120.64	9	1.79233e+07	1.26116e+07	1.77851e+07	1.72208e+07	1.70975e+07	1.39744e+07	1.08164e+07	1.50477e+07	1.13961e+07	1.01792e+07	9.51844e+06	1.47619e+07	1.50767e+07	1.55941e+07	1.4358e+07	1.61462e+07	1.07939e+07	1.35975e+07	1.71953e+07	1.1928e+07	1.35378e+07	1.81359e+07	1.53363e+07	1.64574e+07	1.56592e+07	1.34515e+07	1.52207e+07	1.44957e+07	1.38658e+07	1.34477e+07	9.01653e+06	8.00502e+06	1.43722e+07	1.33569e+07	1.06203e+07
High	QFSFPLSSEPFQGSYK	[K].QFSFPLSSEPFQGSYK.[V]		2.93084e-11	0.000386037	1	1	961	P01023	P01023 [189-204]		0	1848.88	16	1.40635e+08	1.40466e+08	8.67098e+07	1.20531e+08	1.08682e+08	1.01558e+08	1.14427e+08	8.71024e+07	1.32657e+08	7.05169e+07	1.3238e+08	7.99863e+07	6.72895e+07	6.61277e+07	6.50866e+07	8.18563e+07	9.29708e+07	9.37276e+07	5.85487e+07	1.09393e+08	6.23273e+07	6.0206e+07	1.01422e+08	9.39124e+07	9.33102e+07	6.21297e+07	7.20498e+07	6.57515e+07	9.21963e+07	7.98959e+07	1.09969e+08	9.4026e+07	6.37162e+07	9.70642e+07	7.91059e+07
High	QFTSSTSYNR	[K].QFTSSTSYNR.[G]		5.75205e-05	0.000386037	1	1	176	P02671	P02671 [582-591]		0	1190.54	10	6.86233e+07	4.12408e+07	7.13648e+07	6.26308e+07	3.39038e+07	4.03683e+07	5.00035e+07	3.8316e+07	5.80016e+07	5.38098e+07	5.76177e+07	3.11134e+07	3.70316e+07	3.30111e+07	3.86557e+07	3.49472e+07	5.63031e+07	4.35959e+07	5.67667e+07	4.9365e+07	5.15741e+07	4.58441e+07	3.47469e+07	3.99283e+07	2.4515e+07	5.59664e+07	4.36518e+07	3.41945e+07	5.11259e+07	3.25602e+07	4.29893e+07	6.08109e+07	5.85161e+07	2.66585e+07	3.56434e+07
High	QFTSSTSYNRGDSTFESK	[K].QFTSSTSYNRGDSTFESK.[S]		1.44364e-09	0.000386037	1	1	329	P02671	P02671 [582-599]		1	2041.91	18	1.87914e+07	1.0181e+07	1.94902e+07	1.75424e+07	8.23077e+06	1.17445e+07	1.62468e+07	1.11782e+07	1.55003e+07	1.44787e+07	1.7992e+07	1.05466e+07	1.00036e+07	1.02202e+07	8.64651e+06	1.12401e+07	1.78597e+07	1.94749e+07	1.58884e+07	1.58838e+07	1.45892e+07	1.1133e+07	6.85255e+06	1.07523e+07	8.02064e+06	1.77495e+07	1.2568e+07	1.77015e+07	1.69701e+07	1.12231e+07	1.38545e+07	1.37408e+07	2.08519e+07	8.91425e+06	1.07552e+07
High	QGALELIKK	[R].QGALELIKK.[G]		0.000886421	0.000386037	1	1	32	P01024	P01024 [1043-1051]		1	999.62	9	687134	801843	610915	620372	663628	576318	864362	752647	940746	666720	797315	692619	524345	482271	358678	575982	529789	663584	1.02547e+06	633259	820460	565037	237267	391029	498928	931594	584736	657481	508430	384921	462652	946771	1.19682e+06	650939	305458
High	QGFFPDSVNK	[K].QGFFPDSVNK.[A]		0.000252285	0.000386037	1	1	492	P04114	P04114 [708-717]		0	1138.55	10	1.30938e+07	1.31799e+07	1.67695e+07	1.5728e+07	1.03798e+07	1.50467e+07	8.96209e+06	3.30047e+07	1.4238e+07	1.7944e+07	9.29966e+06	1.28111e+07	1.69545e+07	1.51579e+07	1.74017e+07	1.75466e+07	1.45459e+07	1.14019e+07	1.38536e+07	1.14445e+07	1.28085e+07	1.62248e+07	1.11005e+07	1.02513e+07	1.02863e+07	1.01495e+07	1.17856e+07	1.52859e+07	1.31523e+07	9.44346e+06	1.15521e+07	1.36336e+07	8.9248e+06	1.2748e+07	1.15621e+07
High	QGFGNVATNTDGK	[K].QGFGNVATNTDGK.[N]		1.39171e-08	0.000386037	1	1	1653	P02675	P02675 [301-313]		0	1308.62	13	6.31072e+08	3.74384e+08	4.85113e+08	4.96312e+08	2.94342e+08	3.54961e+08	3.89931e+08	3.31368e+08	4.19111e+08	3.81308e+08	3.9904e+08	3.61216e+08	3.11639e+08	3.10385e+08	3.36245e+08	2.89719e+08	4.29532e+08	3.72081e+08	3.88665e+08	3.57426e+08	3.48103e+08	4.08975e+08	3.05711e+08	3.63654e+08	3.35134e+08	3.53023e+08	3.46988e+08	2.91698e+08	3.91868e+08	3.27227e+08	3.62724e+08	2.98889e+08	3.54539e+08	1.70649e+08	3.29793e+08
High	QGHNSVFLIK	[R].QGHNSVFLIK.[G]		0.00341631	0.000386037	1	1	493	P02790	P02790 [103-112]		0	1142.63	10	2.44568e+08	1.86334e+08	2.12057e+08	1.95393e+08	1.7963e+08	1.85302e+08	1.75005e+08	1.73698e+08	1.89803e+08	1.01619e+08	1.89619e+08	1.83601e+08	1.55687e+08	1.95246e+08	1.413e+08	1.72215e+08	2.23255e+08	1.96709e+08	1.17152e+08	1.24361e+08	1.07599e+08	1.24455e+08	1.82659e+08	1.44419e+08	1.53381e+08	1.10462e+08	1.10429e+08	1.50681e+08	1.12592e+08	1.48299e+08	1.25889e+08	9.78191e+07	2.11492e+08	9.49334e+07	1.42322e+08
High	QGLLPVLESFK	[R].QGLLPVLESFK.[V]		1.58872e-06	0.000386037	1	1	1933	P02647	P02647 [240-250]		0	1230.71	11	9.37292e+08	6.67147e+08	9.78063e+08	6.15224e+08	7.029e+08	7.50265e+08	8.61457e+08	6.81951e+08	4.62554e+08	5.80994e+08	5.80377e+08	8.37448e+08	8.13504e+08	7.07379e+08	7.28694e+08	8.21154e+08	6.82819e+08	6.10636e+08	5.70527e+08	5.69173e+08	5.47975e+08	5.06627e+08	6.76145e+08	6.76539e+08	9.76007e+08	6.33482e+08	5.83641e+08	4.95646e+08	5.85639e+08	1.21459e+09	7.4369e+08	5.22053e+08	7.47049e+08	5.79033e+08	5.72891e+08
High	QGIPFFAQVLLVDGK	[R].QGIPFFAQVLLVDGK.[G]		1.49019e-08	0.000386037	1	1	42	P20742	P20742 [357-371]		0	1631.92	15	635064		3.23219e+06	576185						321194	493213	472811	102482			496493	1.15232e+06	485078	126229	4.29294e+06	131658	929767		668132	2.27377e+06	2.17868e+06			3.80503e+06	2.01326e+06			94116.5	114946	806834
High	QGPVNLLSDPEQGVEVTGQYER	[R].QGPVNLLSDPEQGVEVTGQYER.[E]		1.39861e-18	0.000386037	1	1	423	Q14624	Q14624 [754-775]		0	2415.18	22	2.16091e+07	1.72977e+07	1.87351e+07	2.29417e+07	2.01997e+07	1.84106e+07	1.87886e+07	1.81165e+07	1.5385e+07	1.34877e+07	1.6893e+07	1.99912e+07	1.661e+07	1.84757e+07	1.61602e+07	1.89953e+07	2.09768e+07	1.47654e+07	1.9541e+07	1.80873e+07	1.5144e+07	1.55705e+07	1.84325e+07	1.9173e+07	2.18818e+07	1.64713e+07	1.97881e+07	1.74452e+07	1.60354e+07	1.89945e+07	1.1967e+07	1.26877e+07	1.61476e+07	1.60448e+07	1.73405e+07
High	QGQIIYNWQGAQSTQDEVAASAILTAQLDEELGGTPVQSR	[R].QGQIIYNWQGAQSTQDEVAASAILTAQLDEELGGTPVQSR.[V]		1.81175e-16	0.000386037	1	1	31	P06396	P06396 [486-525]		0	4273.1	40	534341	939079	652777	887195	1.18962e+06	1.34205e+06	1.73358e+06	1.03261e+06	984014	1.13382e+06	1.14008e+06	541768	910694	862368	1.0795e+06	989069	985643	921847	1.22863e+06	1.32582e+06	1.34408e+06	843557	1.29533e+06	903199	1.13918e+06	1.37505e+06	1.33826e+06	658594	469918		739902	642671		1.24826e+06	1.09356e+06
High	QGSFQGGFR	[R].QGSFQGGFR.[S]		0.00275835	0.000386037	2	2	14	P0C0L4; P0C0L5	P0C0L4 [1292-1300]; P0C0L5 [1292-1300]		0	983.469	9	5.84138e+06	4.47246e+06	4.11945e+06	6.26432e+06	3.56149e+06	3.89974e+06	3.58943e+06	5.32092e+06	5.37386e+06	4.71649e+06	4.08081e+06	3.69446e+06	3.11067e+06	3.96358e+06	3.02392e+06	2.96312e+06	4.664e+06	6.38907e+06	4.16219e+06	3.0419e+06	4.7678e+06	3.97241e+06	958053	2.45233e+06	3.91673e+06	2.65027e+06	3.27377e+06	2.94342e+06	2.45878e+06	2.27126e+06	2.61119e+06	6.30552e+06	5.03974e+06	2.845e+06	1.48032e+06
High	QGVDADINGLR	[R].QGVDADINGLR.[Q]		6.15177e-06	0.000386037	1	1	118	P35527	P35527 [251-261]		0	1157.59	11	2.6397e+06	3.82927e+06	3.72866e+06	2.57193e+06	1.36738e+07	7.74045e+06	3.04707e+06	2.22168e+06	4.14962e+06	1.84627e+07	1.16595e+07	4.35946e+06	718378	3.16141e+06	3.45837e+06	1.72134e+06	1.90418e+06	2.63562e+06	2.03765e+06	4.05661e+06	3.38476e+06	2.668e+06	2.23833e+06	1.94662e+06	506437	1.90927e+06	1.88909e+06	1.5472e+06	1.65883e+06	1.38737e+06	2.54153e+06	782723	1.54716e+06	612421	1.86338e+06
High	QEPERNECFLQHK	[K].QEPERNECFLQHK.[D]	1xCarbamidomethyl [C8]	5.82415e-07	0.000386037	1	1	1911	P02768	P02768 [118-130]		1	1714.8	13	1.66576e+08	1.44679e+08	1.51533e+08	1.07106e+08	1.29675e+08	1.07593e+08	1.73966e+08	1.18804e+08	1.42525e+08	1.21379e+08	1.16581e+08	1.10404e+08	1.11336e+08	1.09604e+08	1.1369e+08	8.39086e+07	1.50086e+08	1.22743e+08	1.07967e+08	1.54941e+08	1.30884e+08	6.86471e+07	1.12323e+08	1.11438e+08	1.24766e+08	1.47157e+08	1.03788e+08	9.29033e+07	1.52007e+08	1.21173e+08	1.66088e+08	1.38879e+08	1.19888e+08	1.28654e+08	1.12438e+08
High	QELSEAEQATR	[K].QELSEAEQATR.[T]		5.57031e-08	0.000386037	1	1	490	P01024	P01024 [429-439]		0	1261.6	11	1.46013e+07	1.20116e+07	1.42687e+07	8.75081e+06	1.01049e+07	9.20833e+06	8.95069e+06	9.13979e+06	1.01144e+07	8.50567e+06	8.86535e+06	1.09984e+07	1.35053e+07	9.95153e+06	1.06118e+07	8.73702e+06	9.9072e+06	7.61814e+06	9.25267e+06	7.57735e+06	8.3921e+06	8.42515e+06	5.07728e+06	7.29892e+06	9.38425e+06	6.92502e+06	9.58531e+06	7.24721e+06	7.39261e+06	7.71783e+06	8.06381e+06	5.91821e+06	8.88741e+06	6.91465e+06	7.19575e+06
High	QEINSHVEMQTK	[K].QEINSHVEMQTK.[G]	1xOxidation [M9]	0.000677414	0.000386037	1	1	147	P05543	P05543 [171-182]		0	1459.68	12	2.89743e+06	3.29011e+06	4.22223e+06	2.84005e+06	3.58918e+06	2.91508e+06	2.87784e+06	2.01538e+06	2.88128e+06	3.08417e+06	3.02421e+06	3.31615e+06	2.59489e+06	2.01358e+06	2.76312e+06	2.74476e+06	3.09964e+06	2.958e+06	3.36689e+06	2.38266e+06	2.41449e+06	2.52247e+06	3.31046e+06	2.92223e+06	4.4569e+06	2.9639e+06	2.51875e+06	1.48538e+06	3.38126e+06	3.93363e+06	1.97947e+06	1.90975e+06	1.53336e+06	2.60847e+06	2.32133e+06
High	QEINSHVEMQTK	[K].QEINSHVEMQTK.[G]		0.000165516	0.000386037	1	1	52	P05543	P05543 [171-182]		0	1443.69	12	1.79751e+06	1.56498e+06	1.70378e+06	1.043e+06	1.86245e+06	2.16375e+06	1.77364e+06	1.5154e+06	1.40281e+06	1.77952e+06	1.39193e+06	1.39097e+06	862745	1.33391e+06	1.47571e+06	883471	1.34523e+06	2.15485e+06	952571	2.15681e+06	837404	1.39897e+06	1.82196e+06	1.38192e+06	1.88394e+06	527632	1.09624e+06	886094	817419	1.56415e+06	864837	1.17206e+06	888893	1.47472e+06	1.13612e+06
High	NYCGLPGEYWLGNDK	[K].NYCGLPGEYWLGNDK.[I]	1xCarbamidomethyl [C3]	5.99375e-10	0.000386037	1	1	134	P02675	P02675 [314-328]		0	1785.79	15	2.88032e+06	2.36772e+06	2.76683e+06	3.68553e+06	2.32882e+06	2.51468e+06	3.08603e+06	2.38983e+06	3.43309e+06	2.92223e+06	3.07917e+06	2.84153e+06	2.57076e+06	2.51214e+06	2.48909e+06	2.76363e+06	3.20451e+06	2.9748e+06	2.43292e+06	3.04665e+06	2.82779e+06	1.78001e+06	2.18455e+06	3.42475e+06	2.29158e+06	2.38438e+06	2.54113e+06	2.80306e+06	2.71811e+06	2.6979e+06	2.46486e+06	3.17179e+06	3.48767e+06	1.82478e+06	3.24326e+06
High	NYNLVESLK	[K].NYNLVESLK.[L]		0.00110982	0.000386037	1	1	334	P05546	P05546 [402-410]		0	1079.57	9	2.06095e+07	1.24079e+07	2.01202e+07	2.00202e+07	1.76172e+07	1.70813e+07	1.03338e+07	1.55257e+07	1.43765e+07	9.39322e+06	1.51066e+07	2.56041e+07	2.09587e+07	2.3346e+07	1.94008e+07	2.17252e+07	1.93475e+07	1.86932e+07	1.52978e+07	1.47496e+07	1.65342e+07	2.47264e+07	2.04582e+07	2.19681e+07	2.25333e+07	2.11182e+07	1.88746e+07	2.34804e+07	2.47357e+07	2.12544e+07	1.8002e+07	1.58777e+07	2.22342e+07	1.55775e+07	1.39572e+07
High	NYSPYYNTIDDLK	[K].NYSPYYNTIDDLK.[D]		1.23721e-06	0.000386037	1	1	48	P35527	P35527 [200-212]		0	1605.74	13	1.58873e+06	1.20459e+06	1.73789e+06	646613	6.72335e+06	2.60338e+06	1.33173e+06		1.57679e+06	6.69222e+06	6.05798e+06	1.90655e+06		1.01831e+06	1.21586e+06			564998		1.28492e+06	1.12468e+06	1.10841e+06	327236						659765	568846	724819		175351		647527
High	QAAGSGHLLALGTPENPSWLSLHLQDQK	[K].QAAGSGHLLALGTPENPSWLSLHLQDQK.[V]		6.95657e-05	0.000386037	1	1	41	P04278	P04278 [258-285]		0	2968.53	28	399661	305392	1.11555e+06	536699	295607		308436	317491	227280		328308		256473	258466				417697		1.31558e+06	332566		507312	635315	585605	399825			681355	1.07859e+06	489204	342211		252285
High	QAEISASAPTSLR	[K].QAEISASAPTSLR.[S]		4.05372e-06	0.000386037	1	1	123	P04278	P04278 [203-215]		0	1330.7	13	2.78866e+06	1.13292e+06	5.24498e+06	2.12185e+06	1.23696e+06	1.08216e+06	1.53544e+06	1.02555e+06	1.39804e+06	953956	922807	755013	1.04278e+06	999546	782865	914693	871658	1.24344e+06	659412	3.6312e+06	761585	893104	2.24286e+06	2.5454e+06	2.54261e+06	921598	980549	474292	3.58872e+06	3.54104e+06	2.03043e+06	1.45002e+06	838157	1.19084e+06	752437
High	QAMGELSELSFHYLIMAK	[R].QAMGELSELSFHYLIMAK.[G]		1.39854e-10	0.000386037	1	1	4	P20742	P20742 [481-498]		0	2068.02	18					334990										253729					461462														412168
High	QAMGELSELSFHYLIMAK	[R].QAMGELSELSFHYLIMAK.[G]	1xOxidation [M]	3.4433e-09	0.000386037	1	1	13	P20742	P20742 [481-498]		0	2084.02	18	133963	268351	1.18036e+06	223388						110741	526768	160063				363424	596969		100235	2.94243e+06	373783	980460	472677	470006	773244	494945	475438	726973	973061	856673	779823	511433	440254	586642	1.20375e+06
High	QAMGELSELSFHYLIMAK	[R].QAMGELSELSFHYLIMAK.[G]	2xOxidation [M3; M16]	1.67553e-12	0.000386037	1	1	14	P20742	P20742 [481-498]		0	2100.01	18	150807		2.36081e+06	219618						216860	206285		97827			201560	724719	212529		3.04706e+06		759497		304154	1.38608e+06	991469			2.21965e+06	919850			69200		372384
High	NWRDPDQTDGLGLSYLSSHIANVER	[K].NWRDPDQTDGLGLSYLSSHIANVER.[V]		4.01593e-10	0.000386037	1	1	55	P06396	P06396 [395-419]		1	2843.37	25	156169	277545	174627	107428	264623	272920	443678	266370	263138	374005	259065	172592	229622	119393	131859	212170	159838	193209	328393	261280	397975	132848	236172	174216	82372.1	381229	237474	287963	251171	255825	294534	575376	455713	369892	238145
High	QAPGQGLEWMGGIIPIFGTANYAQK	[R].QAPGQGLEWMGGIIPIFGTANYAQK.[F]		2.4319e-05	0.000386037	1	1	12	P01742	P01742 [58-82]		0	2647.33	25	60475.1				224417		176853	90818.2										156179						155769											261070
High	QAVDTAVDGVFIR	[R].QAVDTAVDGVFIR.[S]		1.26484e-07	0.000386037	1	1	387	P19827	P19827 [42-54]		0	1390.73	13	2.1107e+07	1.28381e+07	1.78538e+07	2.62517e+07	1.74394e+07	1.55689e+07	1.72776e+07	2.13937e+07	1.70639e+07	1.39103e+07	1.72262e+07	1.98224e+07	1.82408e+07	1.72213e+07	1.81369e+07	1.45362e+07	1.89884e+07	1.56429e+07	1.89017e+07	1.63455e+07	1.49478e+07	1.05797e+07	1.90639e+07	2.04049e+07	1.5371e+07	1.48835e+07	1.64017e+07	1.93936e+07	1.69604e+07	1.64406e+07	1.45151e+07	1.34425e+07	1.83443e+07	1.08121e+07	1.70729e+07
High	QDGSVDFFR	[R].QDGSVDFFR.[S]		0.00409193	0.000386037	1	1	183	O75636	O75636 [137-145]		0	1070.49	9	3.0603e+06	2.40622e+06	2.02504e+06	2.32892e+06	3.05929e+06	3.52934e+06	2.46647e+06	3.36705e+06	5.17925e+06	3.00774e+06	2.34559e+06	3.77352e+06	4.92893e+06	4.07478e+06	4.81419e+06	1.59649e+06	3.11633e+06	4.44565e+06	1.85661e+06	2.27316e+06	4.00398e+06	4.29851e+06	2.63656e+06	1.22035e+06	3.07071e+06	1.40703e+06	2.59686e+06	3.26294e+06	3.4193e+06	1.92677e+06	4.1025e+06	3.51878e+06	1.16575e+06	2.36064e+06	1.98687e+06
High	QDGSVDFGR	[R].QDGSVDFGR.[K]		0.00206672	0.000386037	1	1	680	P02675	P02675 [286-294]		0	980.443	9	5.14119e+08	2.71412e+08	4.96435e+08	4.20723e+08	2.51823e+08	3.07653e+08	3.05718e+08	2.61873e+08	3.40894e+08	2.99064e+08	3.13943e+08	2.84138e+08	2.49095e+08	2.60783e+08	2.6788e+08	2.44665e+08	3.64409e+08	3.07919e+08	3.01242e+08	2.94979e+08	2.57279e+08	3.49351e+08	2.44048e+08	2.7245e+08	2.72065e+08	2.68958e+08	2.6839e+08	2.16437e+08	3.19411e+08	2.46006e+08	2.60991e+08	2.50889e+08	2.83107e+08	1.34979e+08	2.60126e+08
High	QDGSVDFGRK	[R].QDGSVDFGRK.[W]		0.00132001	0.000386037	1	1	595	P02675	P02675 [286-295]		1	1108.54	10	3.53461e+07	2.06864e+07	2.30721e+07	2.63202e+07	1.87786e+07	2.09495e+07	2.68308e+07	2.06243e+07	2.58227e+07	2.37772e+07	2.60041e+07	2.17877e+07	1.97316e+07	1.45826e+07	1.90816e+07	2.20877e+07	3.11054e+07	2.2017e+07	3.23655e+07	2.41988e+07	2.67489e+07	2.22648e+07	1.76918e+07	1.97267e+07	2.0032e+07	3.2573e+07	2.51432e+07	1.95972e+07	2.71399e+07	2.22999e+07	2.45929e+07	2.19188e+07	2.72461e+07	1.1746e+07	1.91526e+07
High	QDPPSVVVTSHQAPGEK	[R].QDPPSVVVTSHQAPGEK.[K]		1.10361e-11	0.000386037	1	1	168	P25311	P25311 [204-220]		0	1775.89	17	4.85418e+06	5.12078e+06	6.19332e+06	3.62844e+06	5.98288e+06	7.64928e+06	3.5369e+06	5.84602e+06	4.45907e+06	4.01902e+06	3.67352e+06	4.68504e+06	4.31802e+06	4.10873e+06	4.66355e+06	3.14544e+06	2.87134e+06	2.49342e+06	3.15366e+06	4.05266e+06	3.12442e+06	3.50994e+06	3.75361e+06	4.05618e+06	3.72056e+06	2.85313e+06	3.14739e+06	2.1558e+06	3.14514e+06	2.48317e+06	2.6345e+06	3.62345e+06	2.75858e+06	3.12148e+06	2.80012e+06
High	QDSLSSQNQLGVLPLSWDIPELVNMGQWK	[K].QDSLSSQNQLGVLPLSWDIPELVNMGQWK.[I]		2.66473e-18	0.000386037	1	1	220	P01024	P01024 [177-205]		0	3282.65	29	4.88899e+06	6.40875e+06	2.93404e+06	7.54832e+06	6.65552e+06	5.58996e+06	7.58442e+06	9.92419e+06	5.09261e+06	1.01577e+07	7.85241e+06	5.57707e+06	5.00321e+06	6.4708e+06	1.14944e+07	4.50501e+06	3.64634e+06	5.68819e+06	5.53722e+06	6.65763e+06	1.5745e+07	1.428e+07	2.32165e+06	5.25819e+06	1.47762e+07	6.03606e+06	6.5374e+06	7.54024e+06	1.67013e+06	3.29418e+06	2.57954e+06	2.77934e+06	2.6488e+06	6.78344e+06	5.2364e+06
High	QDSLSSQNQLGVLPLSWDIPELVNMGQWK	[K].QDSLSSQNQLGVLPLSWDIPELVNMGQWK.[I]	1xOxidation [M25]	1.82508e-17	0.000386037	1	1	482	P01024	P01024 [177-205]		0	3298.64	29	1.80921e+07	3.04585e+07	2.35323e+07	2.43574e+07	3.25723e+07	2.35786e+07	3.13608e+07	2.09549e+07	2.26172e+07	3.06028e+07	3.49811e+07	1.91543e+07	2.85208e+07	3.21291e+07	3.06465e+07	3.76992e+07	2.32772e+07	3.47054e+07	4.91701e+07	2.86126e+07	3.5024e+07	3.74568e+07	1.51307e+07	2.38196e+07	4.2459e+07	3.88656e+07	3.66226e+07	3.91742e+07	1.6352e+07	1.9073e+07	1.91789e+07	1.46375e+07	1.54768e+07	2.30794e+07	2.78517e+07
High	QEDDLANINQWVK	[K].QEDDLANINQWVK.[E]		4.99071e-09	0.000386037	1	1	312	P08697	P08697 [197-209]		0	1572.77	13	1.24784e+07	9.37528e+06	9.4097e+06	1.07699e+07	1.26525e+07	1.06038e+07	9.73556e+06	9.57573e+06	1.03544e+07	8.40629e+06	9.98545e+06	1.07994e+07	9.10894e+06	1.06049e+07	1.4044e+07	8.85831e+06	9.92548e+06	9.40736e+06	1.055e+07	9.78752e+06	8.13828e+06	1.05551e+07	1.03105e+07	1.0577e+07	8.65291e+06	8.74733e+06	8.7445e+06	8.64963e+06	1.12119e+07	7.35888e+06	7.0918e+06	7.61702e+06	1.01072e+07	7.30113e+06	7.92691e+06
High	QAPGQGLEWMGGIIPIFGTANYAQK	[R].QAPGQGLEWMGGIIPIFGTANYAQK.[F]	1xOxidation [M10]	1.00074e-07	0.000386037	1	1	1	P01742	P01742 [58-82]		0	2663.33	25				1.18828e+06				662855	526679	1.10187e+06		457484	640761	462610				417918	569284		508202	582580	776061	465318	361464		563773	583451		878793	409975	618112			728118
High	NRDVVLTTTFVDDIK	[R].NRDVVLTTTFVDDIK.[A]		2.78474e-07	0.000386037	1	1	159	P02748	P02748 [310-324]		1	1735.92	15	1.91921e+06	1.65314e+06	972756	2.84207e+06	1.42804e+06	1.73297e+06	2.06695e+06	1.30608e+06	1.98167e+06	2.8404e+06	2.16987e+06	1.67413e+06	1.96406e+06	2.13122e+06	1.09443e+06	2.19844e+06	1.69785e+06	2.25973e+06	1.66408e+06	1.88867e+06	2.35157e+06	2.69578e+06	1.83059e+06	1.85026e+06	3.59361e+06	2.10597e+06	2.1128e+06	745200	1.17323e+06	2.38035e+06	1.43342e+06	1.39631e+06	2.28836e+06	2.37973e+06	3.05337e+06
High	NQVSLTCLVK	[K].NQVSLTCLVK.[G]	1xCarbamidomethyl [C7]	2.84482e-05	0.000386037	4	4	193	P01857; P01861; P01859; P01860	P01857 [244-253]; P01861 [241-250]; P01859 [240-249]; P01860 [291-300]		0	1161.63	10	3.54538e+07	3.08323e+07	2.50809e+07	2.64821e+07	2.46626e+07	2.20752e+07	3.81812e+07	3.20527e+07	2.54756e+07	3.27568e+07	3.2599e+07	4.40693e+07	2.76091e+07	2.96535e+07	3.02828e+07	3.29687e+07	2.93529e+07	2.75309e+07	1.80725e+07	2.6841e+07	3.56891e+07	3.02092e+07	4.08418e+07	2.46163e+07	3.021e+07	3.12861e+07	2.51711e+07	2.79519e+07	4.07043e+07	3.85959e+07	4.6144e+07	4.99181e+07	3.38068e+07	3.53865e+07	3.7724e+07
High	NQLTSNPENTVFDAK	[K].NQLTSNPENTVFDAK.[R]		6.4494e-06	0.000386037	1	1	43	P11021	P11021 [82-96]		0	1677.81	15	379816	194656	369529	295720	191389	182553		164241	240963		205736	288257		220911		198441	260407	219223	133478	198727		156340		330911		184256	254581	176410	205664	265052			512085		316487
High	NFPPSQDASGDLYTTSSQLTLPATQCPDGK	[R].NFPPSQDASGDLYTTSSQLTLPATQCPDGK.[S]	1xCarbamidomethyl [C26]	0.00540923	0.000386037	1	1	11	P01877	P01877 [52-81]		0	3196.47	30										594091																						649660
High	NFPSPVDAAFR	[K].NFPSPVDAAFR.[Q]		0.000102402	0.000386037	1	1	1400	P02790	P02790 [92-102]		0	1220.61	11	2.69329e+08	2.24585e+08	2.90969e+08	2.22098e+08	2.90792e+08	2.32453e+08	2.21426e+08	2.14238e+08	2.84003e+08	2.22911e+08	2.67828e+08	2.44075e+08	2.32313e+08	2.6367e+08	2.35494e+08	2.91388e+08	2.73039e+08	2.61487e+08	2.30422e+08	2.11233e+08	2.17101e+08	2.66383e+08	2.5943e+08	2.25088e+08	2.66961e+08	2.04177e+08	2.54309e+08	2.35703e+08	2.83847e+08	2.14685e+08	2.27039e+08	1.64404e+08	2.46676e+08	2.20592e+08	2.31193e+08
High	NFVASHIANILNSEELDIQDLK	[K].NFVASHIANILNSEELDIQDLK.[K]		7.16413e-29	0.000386037	1	1	410	P04114	P04114 [591-612]		0	2483.28	22	2.27618e+06	7.29864e+06	6.98973e+06	8.13938e+06	7.76649e+06	1.09882e+07	9.04393e+06	1.10624e+07	9.0217e+06	8.82025e+06	8.30039e+06	4.21667e+06	1.55407e+07	1.0057e+07	1.71154e+07	1.34151e+07	6.54532e+06	6.91276e+06	1.69125e+07	8.59787e+06	1.36792e+07	1.04961e+07	7.72619e+06	8.17696e+06	7.40671e+06	1.42275e+07	1.44093e+07	1.44113e+07	7.46521e+06	1.06656e+07	9.10916e+06	1.17319e+07	7.01789e+06	1.5339e+07	1.07513e+07
High	NFVASHIANILNSEELDIQDLKK	[K].NFVASHIANILNSEELDIQDLKK.[L]		7.55902e-19	0.000386037	1	1	131	P04114	P04114 [591-613]		1	2611.37	23	643028	1.26136e+06	868362	965317	1.31818e+06	856869	1.18112e+06	1.49504e+06	1.22411e+06	1.66634e+06	1.56507e+06	252408	2.06786e+06	684020	1.75822e+06	1.61034e+06	939302	1.03787e+06	3.08806e+06	1.83065e+06	2.67264e+06	1.08885e+06	860111	717764	792274	2.81648e+06	2.52141e+06	2.43553e+06	929199	436167	1.50046e+06	1.80664e+06	1.68794e+06	2.0383e+06	1.31868e+06
High	NGESVKLHLETDSLALVALGALDTALYAAGSK	[R].NGESVKLHLETDSLALVALGALDTALYAAGSK.[S]		0.00597666	0.000386037	2	2	2	P0C0L4; P0C0L5	P0C0L4 [583-614]; P0C0L5 [583-614]		1	3227.72	32		24825.7		59927.2		30432.8																													61965
High	NGIDIYSLTVDSR	[K].NGIDIYSLTVDSR.[V]		2.02704e-10	0.000386037	1	1	516	Q14624	Q14624 [31-43]		0	1452.73	13	2.09132e+07	1.5908e+07	2.35936e+07	2.49628e+07	1.81118e+07	1.64535e+07	1.85244e+07	1.84511e+07	1.6352e+07	1.50797e+07	1.83776e+07	2.12238e+07	1.73069e+07	2.19628e+07	1.89216e+07	1.92279e+07	1.87339e+07	1.61342e+07	1.8781e+07	1.87279e+07	1.51201e+07	1.94427e+07	2.00956e+07	2.53347e+07	2.21276e+07	1.7664e+07	2.62562e+07	1.91375e+07	1.74009e+07	2.44165e+07	1.61647e+07	1.77551e+07	2.02457e+07	2.10474e+07	2.1677e+07
High	NGLYADNDNDSTFTGFLLYHDTN	[R].NGLYADNDNDSTFTGFLLYHDTN.[-]		1.62715e-12	0.000386037	1	1	260	Q15848	Q15848 [222-244]		0	2607.13	23	2.34958e+06	1.29687e+06	3.3095e+06	2.07173e+06	1.41752e+06	2.92167e+06	2.13653e+06	1.23182e+06	2.1556e+06	544054	2.17582e+06	1.55539e+06	1.89627e+06	1.03315e+06	1.98996e+06	3.0899e+06	2.88622e+06	1.63953e+06	1.11704e+06	2.5296e+06	814862	708390	3.14145e+06	4.43777e+06	2.26229e+06	3.45786e+06	1.8332e+06	1.66811e+06	2.20315e+06	3.8691e+06	2.42085e+06	1.40086e+06	1.81578e+06	1.4852e+06	2.91119e+06
High	NGNLPEFGDAISTASK	[K].NGNLPEFGDAISTASK.[A]		0.000270508	0.000386037	1	1	5	Q9Y490	Q9Y490 [1416-1431]		0	1620.79	16												175327
High	NGNMAGISDQR	[K].NGNMAGISDQR.[I]		5.70349e-06	0.000386037	1	1	151	P05546	P05546 [421-431]		0	1162.53	11	3.36031e+06	2.12259e+06	2.53267e+06	2.61305e+06	3.36526e+06	3.34681e+06	2.19182e+06	4.50334e+06	2.85398e+06	2.01658e+06	2.17038e+06	3.68935e+06	2.6342e+06	3.27888e+06	3.3111e+06	1.92586e+06	2.47871e+06	2.89415e+06	1.99729e+06	4.34009e+06	2.59847e+06	4.04617e+06	3.96125e+06	3.11419e+06	2.94235e+06	2.2091e+06	2.86719e+06	3.09357e+06	1.85055e+06	2.71351e+06	1.8141e+06	2.05206e+06	2.84563e+06	2.67954e+06	2.11036e+06
High	NGNMAGISDQR	[K].NGNMAGISDQR.[I]	1xOxidation [M4]	4.85513e-06	0.000386037	1	1	306	P05546	P05546 [421-431]		0	1178.52	11	7.19578e+06	2.61077e+06	4.36431e+06	4.458e+06	5.09588e+06	5.43076e+06	2.16904e+06	3.86485e+06	3.32803e+06	1.87359e+06	2.74123e+06	4.73022e+06	4.78506e+06	3.44988e+06	2.48644e+06	2.69186e+06	3.47144e+06	1.82927e+06	3.07546e+06	2.28857e+06	2.66603e+06	2.97463e+06	2.93281e+06	3.91286e+06	2.27605e+06	3.14629e+06	3.31404e+06	2.86337e+06	3.16135e+06	3.15584e+06	1.77318e+06	1.56068e+06	2.68419e+06	1.90961e+06	1.6613e+06
High	NGQHVASSPIPVVISQSEIGDASR	[K].NGQHVASSPIPVVISQSEIGDASR.[V]		1.75934e-08	0.000386037	1	1	2	P21333	P21333 [2026-2049]		0	2448.25	24
High	NGQWSEPPK	[R].NGQWSEPPK.[C]		0.00504665	0.000386037	2	3	291	P08603; Q03591	P08603 [1154-1162]; Q03591 [253-261]		0	1042.5	9	9.3025e+06	8.11532e+06	1.09686e+07	7.43969e+06	1.09145e+07	1.19812e+07	9.13602e+06	1.17571e+07	1.48179e+07	8.59859e+06	9.30869e+06	9.55626e+06	9.149e+06	6.44117e+06	1.09413e+07	1.00643e+07	9.01643e+06	1.17072e+07	9.01503e+06	1.19938e+07	8.49165e+06	1.12358e+07	9.71074e+06	1.14379e+07	1.19882e+07	8.00469e+06	9.64897e+06	7.72411e+06	7.96652e+06	8.74809e+06	9.61044e+06	1.02692e+07	1.04413e+07	7.96617e+06	8.67055e+06
High	NGVAQEPVHLDSPAIK	[K].NGVAQEPVHLDSPAIK.[H]		1.36818e-15	0.000386037	1	1	460	P04217	P04217 [63-78]		0	1674.88	16	1.16707e+08	9.06927e+07	1.2496e+08	8.67363e+07	7.22176e+07	6.56595e+07	7.62227e+07	7.29952e+07	7.53253e+07	6.64042e+07	6.97226e+07	8.45779e+07	6.53603e+07	7.65152e+07	7.63679e+07	9.08047e+07	9.84981e+07	8.68411e+07	6.71417e+07	5.7944e+07	6.26839e+07	9.55712e+07	1.21005e+08	9.48647e+07	9.30187e+07	6.90354e+07	4.70673e+07	7.35024e+07	8.66027e+07	1.03414e+08	1.07209e+08	6.48695e+07	9.7807e+07	7.27566e+07	8.8555e+07
High	NHLQLEGLFFTNGEHTSK	[K].NHLQLEGLFFTNGEHTSK.[A]		1.21092e-13	0.000386037	1	1	359	P04114	P04114 [3569-3586]		0	2072.02	18	1.04354e+07	1.50042e+07	1.45261e+07	1.54504e+07	1.71175e+07	1.96059e+07	1.27789e+07	2.29704e+07	2.36101e+07	2.04462e+07	1.11772e+07	1.02195e+07	2.47618e+07	2.00744e+07	2.38501e+07	1.47551e+07	1.20714e+07	1.42277e+07	1.71495e+07	1.8602e+07	1.74688e+07	1.88407e+07	1.21439e+07	1.23714e+07	1.1484e+07	1.40222e+07	1.95482e+07	1.90544e+07	1.51154e+07	8.60543e+06	1.56547e+07	1.97868e+07	1.35009e+07	2.01414e+07	1.59185e+07
High	NHMQYEIVIK	[R].NHMQYEIVIK.[V]		0.00840516	0.000386037	1	1	58	P19827	P19827 [171-180]		0	1274.66	10	2.15933e+06	4.2876e+06	2.14783e+06	3.81522e+06	2.53521e+06	4.0853e+06	2.43972e+06	6.46227e+06	2.65928e+06	4.11845e+06	2.27579e+06	4.9809e+06	5.21039e+06	4.43216e+06	1.53759e+06	1.88419e+06	2.78847e+06	2.36824e+06	2.40114e+06	3.29002e+06	3.72865e+06	3.45926e+06	3.13313e+06	3.66365e+06	3.72591e+06	1.75355e+06	1.62025e+06	4.19222e+06	3.45673e+06	5.07011e+06	2.03914e+06	2.76718e+06	7.03827e+06	5.16876e+06	2.64225e+06
High	NHMQYEIVIK	[R].NHMQYEIVIK.[V]	1xOxidation [M3]	0.00728415	0.000386037	1	1	214	P19827	P19827 [171-180]		0	1290.65	10	6.86699e+06	5.19662e+06	8.95263e+06	7.42161e+06	6.05778e+06	6.307e+06	6.00526e+06	5.75215e+06	7.64812e+06	5.0926e+06	6.68723e+06	7.32168e+06	6.49597e+06	6.60775e+06	7.39177e+06	5.76689e+06	8.34493e+06	6.66195e+06	7.82529e+06	5.94808e+06	5.09828e+06	3.87728e+06	6.54299e+06	7.08678e+06	5.55643e+06	5.92507e+06	6.1054e+06	6.6658e+06	6.63796e+06	6.17263e+06	5.92639e+06	5.06701e+06	6.07237e+06	5.2136e+06	5.59632e+06
High	NHNALLASLTTQK	[R].NHNALLASLTTQK.[K]		5.05198e-08	0.000386037	1	1	146	O75882	O75882 [818-830]		0	1410.77	13	1.11999e+06	1.7734e+06	870988	1.60914e+06	2.14242e+06	2.25173e+06	1.91414e+06	2.28207e+06	1.98631e+06	2.51741e+06	1.71691e+06	1.52039e+06	1.89299e+06	1.21237e+06	459263	1.30063e+06	1.70648e+06	1.57332e+06	1.65081e+06	1.19084e+06	2.92414e+06	2.02473e+06	1.78065e+06	1.69562e+06	1.8116e+06	2.4484e+06	812925	2.11952e+06	2.11567e+06	3.03758e+06	1.49921e+06	2.59744e+06	3.03087e+06	2.2169e+06	1.86111e+06
High	NFPPSQDASGDLYTTSSQLTLPATQCLAGK	[R].NFPPSQDASGDLYTTSSQLTLPATQCLAGK.[S]	1xCarbamidomethyl [C26]	3.41824e-12	0.000386037	1	1	779	P01876	P01876 [52-81]		0	3168.52	30	2.84501e+06	1.62665e+06	2.68039e+06	2.46934e+06	601607	739194	3.59414e+06	5.89401e+06	2.84444e+06	3.09464e+06	3.46935e+06	1.87794e+06	2.67005e+06	1.56287e+06	1.18267e+06	2.94661e+06	1.53704e+06	4.39738e+06	2.85807e+06	4.73451e+06	3.52978e+06	1.1583e+06	2.95944e+06	1.68749e+06	1.9553e+06	3.53345e+06	1.76066e+06	2.514e+06	1.47994e+06	929175	2.68703e+06	1.33631e+06	3.68202e+06	3.93478e+06	3.20452e+06
High	NFPDLNTYIYYNEK	[R].NFPDLNTYIYYNEK.[Y]		3.66002e-08	0.000386037	1	1	148	P15169	P15169 [162-175]		0	1793.84	14	460061	275185		525502	663357	863253	1.67028e+06	635858	531909	632651	1.59009e+06	484048	749247	484291	654834	726990	627798	1.5586e+06	648004	900779	1.23807e+06	1.15552e+06	782346	775234	646161		728994	589111	593505	1.03207e+06	611157	552639	775349	883080	799717
High	NELIPLIYLENPR	[R].NELIPLIYLENPR.[R]		2.26797e-08	0.000386037	1	1	72	P20742	P20742 [158-170]		0	1583.88	13	704686		3.74917e+06	577087						187085	301825	626142	97728.8			515950	1.41551e+06	319767		4.81154e+06	112434	1.16292e+06		564740	2.17097e+06	1.48757e+06	146558		5.3898e+06	1.74102e+06				137589	951704
High	NEEDVAELSISPSDNAVVLTNLLPGTEYVVSVSSVYEQHESTPLR	[K].NEEDVAELSISPSDNAVVLTNLLPGTEYVVSVSSVYEQHESTPLR.[G]		1.89313e-14	0.000386037	1	1	9	P02751	P02751 [1307-1351]		0	4887.41	45		582479	1.38421e+06	1.01845e+06		1.03307e+06	1.01033e+06	1.09937e+06		1.27064e+06								645401	775768	784556	651204	382119				1.28269e+06									1.24027e+06
High	MYQMDIQQELQR	[R].MYQMDIQQELQR.[Y]	1xOxidation [M]	4.75284e-09	0.000386037	1	1	577	P04114	P04114 [2523-2534]		0	1598.73	12	3.67224e+06	6.40388e+06	3.58874e+06	5.14232e+06	5.97493e+06	6.85893e+06	4.36894e+06	9.53582e+06	6.77632e+06	7.09419e+06	3.30737e+06	7.5528e+06	1.14131e+07	4.886e+06	7.33322e+06	6.01564e+06	5.69749e+06	3.62361e+06	5.35898e+06	5.67023e+06	8.20016e+06	9.91899e+06	8.13414e+06	6.85177e+06	5.25584e+06	5.01656e+06	5.04358e+06	9.36803e+06	6.13722e+06	5.51431e+06	5.59367e+06	7.95014e+06	4.87826e+06	1.19085e+07	8.3626e+06
High	MYQMDIQQELQR	[R].MYQMDIQQELQR.[Y]	2xOxidation [M1; M4]	5.29192e-09	0.000386037	1	1	529	P04114	P04114 [2523-2534]		0	1614.73	12	1.16902e+07	1.22197e+07	1.843e+07	1.38242e+07	5.51604e+06	1.39627e+07	7.60454e+06	1.35532e+07	1.18602e+07	5.10228e+06	7.67421e+06	1.17924e+07	9.86472e+06	1.04011e+07	1.68561e+07	1.3332e+07	5.86257e+06	7.66567e+06	7.49377e+06	4.72139e+06	1.15765e+07	1.22963e+07	1.07725e+07	8.41816e+06	4.20649e+06	6.5949e+06	7.90435e+06	1.03533e+07	9.853e+06	7.8302e+06	8.09544e+06	7.41074e+06	5.9721e+06	1.02185e+07	9.79034e+06
High	MYSVNGYTFGSLPGLSMCAEDR	[R].MYSVNGYTFGSLPGLSMCAEDR.[V]	1xCarbamidomethyl [C18]; 2xOxidation [M1; M17]	1.05357e-10	0.000386037	1	1	182	P00450	P00450 [259-280]		0	2487.06	22	970631	1.6554e+06	2.52482e+06	1.80389e+06	1.61486e+06	1.47435e+06	1.64095e+06	1.47069e+06	1.40758e+06	1.01919e+06	1.77747e+06	1.64253e+06	1.34777e+06	1.61154e+06	1.06209e+06	1.74619e+06	1.44523e+06	1.62092e+06	1.96131e+06	2.23476e+06	1.38056e+06	1.36649e+06	1.41728e+06	1.51038e+06	2.16971e+06	1.66684e+06	1.8237e+06	1.31282e+06	2.36802e+06	2.82241e+06	1.62563e+06	1.47123e+06	1.21281e+06	1.18246e+06	1.6475e+06
High	MYVAVWTPYGVLR	[R].MYVAVWTPYGVLR.[T]	1xOxidation [M1]	0.000435144	0.000386037	1	1	9	P00488	P00488 [160-172]		0	1570.81	13			114346				128135			114373		119183				110611		141502	116290		79204.2						171895		122301
High	MYYSAVDPTK	[K].MYYSAVDPTK.[D]		0.00149297	0.000386037	1	1	208	P00450	P00450 [538-547]		0	1174.54	10	6.55164e+06	5.56576e+06	8.09637e+06	8.5424e+06	5.85222e+06	7.28796e+06	7.01361e+06	9.58237e+06	6.48577e+06	5.4611e+06	7.67564e+06	9.27178e+06	5.8661e+06	8.36959e+06	6.99913e+06	5.76112e+06	6.3864e+06	6.98783e+06	5.23825e+06	1.09179e+07	5.26113e+06	8.17743e+06	8.43695e+06	8.65723e+06	9.77032e+06	3.33432e+06	7.08988e+06	5.68505e+06	5.58813e+06	1.3299e+07	6.31717e+06	7.48533e+06	7.87914e+06	7.42173e+06	9.94165e+06
High	MYYSAVDPTK	[K].MYYSAVDPTK.[D]	1xOxidation [M1]	5.59655e-06	0.000386037	1	1	1066	P00450	P00450 [538-547]		0	1190.54	10	4.8219e+07	3.72203e+07	6.98123e+07	5.5083e+07	3.39582e+07	3.78373e+07	3.64335e+07	3.91593e+07	3.52047e+07	3.10754e+07	4.07882e+07	4.55156e+07	3.2886e+07	4.17514e+07	3.33356e+07	4.27295e+07	4.53886e+07	3.85716e+07	4.12946e+07	4.44268e+07	3.19354e+07	3.82295e+07	3.6809e+07	4.41249e+07	5.5941e+07	3.9545e+07	3.65817e+07	2.61251e+07	5.05857e+07	6.68608e+07	4.34274e+07	2.99433e+07	3.19497e+07	2.71654e+07	3.85813e+07
High	NAAENGAIQNLIK	[R].NAAENGAIQNLIK.[E]		1.32947e-05	0.000386037	1	1	92	P11226	P11226 [167-179]		0	1355.73	13	784173	377028	874937	1.09684e+06	1.09625e+06	900688	431742		248644	473519	635790	999953	743021	2.93507e+06	538985	530784	1.1285e+06	454550	551397	912101	1.5434e+06	2.05392e+06	242442	1.66983e+06	259222		543882	1.04143e+06	1.2458e+06		327460		965965		925320
High	NADLQVLKPEPELVYEDLR	[K].NADLQVLKPEPELVYEDLR.[G]		1.41571e-09	0.000386037	1	1	2	P01833	P01833 [232-250]		0	2241.18	19
High	NKADYVETVLDSTCSSTVQFLEYELNVLGTHK	[K].NKADYVETVLDSTCSSTVQFLEYELNVLGTHK.[I]	1xCarbamidomethyl [C14]	0.00177193	0.000386037	1	1	2	P04114	P04114 [3904-3935]		1	3660.77	32		24797.3		60553.5		56479.3		34598.8		120874							26365	42530.2	70294.8	53343.2		26608.1				138248	63561.8			36231.2	57466.4			79317.8
High	NADYSYSVWK	[R].NADYSYSVWK.[G]		0.000187267	0.000386037	1	1	31	P01031	P01031 [1061-1070]		0	1232.56	10	5.96716e+06	4.94867e+06	5.53522e+06	4.87419e+06	5.40253e+06	4.52508e+06	4.09314e+06	4.19468e+06	5.29019e+06	5.06946e+06	5.69826e+06	7.649e+06	5.67563e+06	7.10943e+06	4.76092e+06	6.20257e+06	6.74086e+06	7.18506e+06	5.84508e+06	4.84881e+06	5.2721e+06	7.70871e+06	5.53836e+06	5.66365e+06	6.70234e+06	6.28572e+06	4.72278e+06	6.16426e+06	5.52827e+06	5.57998e+06	5.88954e+06	5.48884e+06	6.55656e+06	4.71105e+06	5.17944e+06
High	NALALFVLPK	[K].NALALFVLPK.[E]		8.48209e-05	0.000386037	1	1	128	P05543	P05543 [264-273]		0	1085.67	10	7.16926e+06	4.87272e+06	9.51216e+06	6.60409e+06	7.5237e+06	8.33132e+06	5.73439e+06	4.98491e+06	5.87959e+06	7.12334e+06	7.43631e+06	7.70932e+06	6.34627e+06	6.91254e+06	6.71411e+06	7.39965e+06	7.88709e+06	7.488e+06	6.93472e+06	6.79527e+06	5.20667e+06	6.35325e+06	6.95197e+06	7.04621e+06	8.74215e+06	7.41047e+06	5.25823e+06	5.60581e+06	6.26938e+06	1.00365e+07	5.94333e+06	6.38009e+06	5.29496e+06	8.23968e+06	7.98919e+06
High	NALTGLPPGLFQASATLDTLVLK	[R].NALTGLPPGLFQASATLDTLVLK.[E]		6.08228e-12	0.000386037	1	1	355	P02750	P02750 [126-148]		0	2340.32	23	1.51413e+06	2.43417e+06	5.41365e+06	5.46809e+06	7.1041e+06		3.41392e+06	3.3496e+06	4.20406e+06	4.2969e+06		3.57554e+06	4.01784e+06	6.9508e+06		5.74133e+06	3.12108e+06	9.92802e+06	6.53079e+06	3.71946e+06	4.88048e+06	4.60858e+06	8.09332e+06	3.04156e+06	5.96577e+06	5.45163e+06			2.4784e+06	8.44578e+06	7.38248e+06	1.81514e+06	2.61942e+06	8.65586e+06
High	NALWHTGDTESQVR	[R].NALWHTGDTESQVR.[L]		5.92345e-06	0.000386037	1	1	113	P49747	P49747 [652-665]		0	1613.77	14	870800	766325	626779	766351	826645	791747	814635	776128	955440	626821	816218	566017	790283	562797	761761	817881	996609	1.11762e+06	990316	466938	586519	613537	1.25031e+06	545261	444126	452588	687602	587518	502416	376989	406699	595852	615251	1.02266e+06	714987
High	NDNDNIFLSPLSISTAFAMTK	[K].NDNDNIFLSPLSISTAFAMTK.[L]		1.61138e-16	0.000386037	1	1	369	P01008	P01008 [103-123]		0	2299.13	21	3.40293e+06	4.59349e+06	3.07513e+06	6.88323e+06	5.48699e+06	5.09291e+06	7.54831e+06	5.74913e+06	6.63666e+06	5.50889e+06	6.47205e+06	4.30466e+06	7.09406e+06	7.58649e+06	6.81415e+06	5.63666e+06	3.87844e+06	5.32455e+06	5.31283e+06	6.80495e+06	6.35212e+06	5.65882e+06	6.88969e+06	7.90591e+06	6.20504e+06	5.48533e+06	6.64258e+06	8.16869e+06	2.59759e+06	5.37026e+06	3.77651e+06	4.71921e+06	4.95427e+06	7.34898e+06	8.91569e+06
High	NDNDNIFLSPLSISTAFAMTK	[K].NDNDNIFLSPLSISTAFAMTK.[L]	1xOxidation [M19]	7.50361e-14	0.000386037	1	1	643	P01008	P01008 [103-123]		0	2315.12	21	1.78383e+07	1.78048e+07	2.11928e+07	1.71029e+07	2.52661e+07	1.75146e+07	2.0729e+07	1.66363e+07	1.6192e+07	1.54777e+07	2.98701e+07	2.0918e+07	2.38449e+07	2.37465e+07	3.00557e+07	2.55223e+07	1.91625e+07	2.20592e+07	2.7203e+07	1.88171e+07	1.6541e+07	1.70527e+07	2.35702e+07	2.72194e+07	2.23662e+07	2.84267e+07	2.79949e+07	2.63307e+07	2.1411e+07	2.03248e+07	1.92982e+07	1.69634e+07	2.18707e+07	1.91502e+07	2.95103e+07
High	NEADELRK	[R].NEADELRK.[A]		0.00926351	0.000386037	1	1	220	O14791	O14791 [106-113]		1	974.49	8	5.01262e+06	5.21777e+06	6.04394e+06	4.78116e+06	4.5493e+06	6.96693e+06	3.11404e+06	4.6277e+06	2.648e+06	4.22358e+06	2.95073e+06	4.42705e+06	6.15562e+06	4.59264e+06	5.59711e+06	4.8417e+06	4.17302e+06	3.39246e+06	6.80339e+06	5.05795e+06	4.2508e+06	4.22608e+06	5.09323e+06	2.42412e+06	3.55574e+06	4.49429e+06	6.49797e+06	4.00788e+06	5.26575e+06	5.19181e+06	3.69733e+06	2.98014e+06	3.73986e+06	3.55232e+06	2.96561e+06
High	NECFLQHK	[R].NECFLQHK.[D]	1xCarbamidomethyl [C3]	0.0115681	0.000386037	1	1	414	P02768	P02768 [123-130]		0	1075.5	8	1.78866e+08	1.69655e+08	1.40516e+08	1.18129e+08	1.70894e+08	1.35893e+08	1.98863e+08	1.22508e+08	1.35034e+08	1.53256e+08	1.29372e+08	1.36455e+08	1.34509e+08	1.26916e+08	1.59308e+08	8.73348e+07	1.63228e+08	1.35582e+08	1.19672e+08	1.74378e+08	1.44359e+08	7.38542e+07	1.67676e+08	1.36564e+08	1.21272e+08	1.2203e+08	1.26733e+08	8.06808e+07	1.60215e+08	1.41317e+08	2.09226e+08	1.4128e+08	1.07314e+08	1.45572e+08	1.26185e+08
High	NEDSLVFVQTDK	[K].NEDSLVFVQTDK.[S]		2.15987e-08	0.000386037	1	1	1184	P01023	P01023 [124-135]		0	1394.68	12	2.51364e+08	2.17474e+08	1.75743e+08	2.06615e+08	2.0753e+08	1.4533e+08	1.87578e+08	1.32451e+08	2.31265e+08	1.19222e+08	2.89431e+08	2.08091e+08	1.96267e+08	1.60886e+08	1.37212e+08	2.08324e+08	2.37315e+08	2.52907e+08	1.39384e+08	1.7957e+08	1.30654e+08	1.62804e+08	2.80546e+08	2.24273e+08	2.06503e+08	1.52412e+08	1.32384e+08	1.78183e+08	2.85129e+08	1.99041e+08	3.07997e+08	2.0386e+08	1.76264e+08	1.96698e+08	1.68065e+08
High	NAEPGLFPWQALIVVEDTSR	[R].NAEPGLFPWQALIVVEDTSR.[V]		0.000871716	0.000386037	1	1	11	MASP3	MASP3 [455-474]		0	2242.15	20		95813.4		59142.7			81011.3	87985.9	66684.5	84062	84497.8	43991.6		88428.5		83070.4	47621.8				89149.1	96421.7		77087.2	48091.8	74338.6	120834	80488					72101.9	116102
High	NKYEDEINKR	[RK].NKYEDEINKR.[T]		0.00160695	0.000386037	3	6	4	P04264; P02538; P13647	P04264 [268-277]; P02538 [251-260]; P13647 [256-265]		2	1308.65	10		74784.4	110373		609605	277185	115051		191326	700997	481888	162241			72955.1			69166.7	211808	103732		42266.8				99056.1							164218		128602
High	NLAVSQVVHK	[R].NLAVSQVVHK.[A]		9.19622e-05	0.000386037	1	1	1214	P01011	P01011 [351-360]		0	1094.63	10	1.65229e+08	1.01907e+08	1.18117e+08	1.31841e+08	1.17826e+08	1.06544e+08	1.07849e+08	9.74962e+07	1.12641e+08	1.15376e+08	1.36728e+08	1.26067e+08	1.0387e+08	1.38484e+08	1.22795e+08	1.29729e+08	1.20903e+08	1.11787e+08	1.11676e+08	1.18663e+08	8.85262e+07	1.2741e+08	9.65405e+07	1.21424e+08	1.43312e+08	1.13945e+08	1.07164e+08	8.15332e+07	1.29849e+08	1.18145e+08	1.18056e+08	9.25904e+07	1.01883e+08	9.98005e+07	1.09009e+08
High	NLDLDSIIAEVK	[R].NLDLDSIIAEVK.[A]		8.65906e-07	0.000386037	3	7	148	P35908; P02538; P13647	P35908 [342-353]; P02538 [327-338]; P13647 [332-343]		0	1329.73	12	2.15173e+06	1.51894e+06	2.901e+06	1.2597e+06	7.83014e+06	5.70197e+06	1.77391e+06	272440	1.57132e+06	4.2931e+06	4.33937e+06	1.45207e+06	792476	1.98521e+06	1.18271e+06	472642	790828	1.9412e+06	3.23749e+06	1.46739e+06	2.02989e+06	1.73496e+06	1.56338e+06	1.05677e+06	566294	775805	1.31629e+06	169603	685880	385982	495300	200007	1.54132e+06	192710	1.21343e+06
High	NNALDFVTK	[R].NNALDFVTK.[S]		0.00489299	0.000386037	1	1	231	P04114	P04114 [3213-3221]		0	1021.53	9	2.55978e+07	3.21935e+07	3.6692e+07	3.16419e+07	2.65939e+07	3.6803e+07	2.17619e+07	4.19488e+07	3.22174e+07	2.45327e+07	2.08775e+07	2.69152e+07	4.29324e+07	3.40753e+07	3.16127e+07	3.59781e+07	3.03647e+07	2.54641e+07	2.44359e+07	2.00653e+07	2.89349e+07	3.77758e+07	2.75721e+07	2.52892e+07	1.97833e+07	2.62549e+07	2.31704e+07	3.43567e+07	3.27012e+07	2.29941e+07	2.5959e+07	3.27821e+07	2.01429e+07	3.76268e+07	3.29699e+07
High	NNANGVDLNR	[R].NNANGVDLNR.[N]		0.000265836	0.000386037	1	1	173	P15169	P15169 [152-161]		0	1086.53	10	1.26752e+06	1.35324e+06	723625	1.15723e+06	1.30847e+06	1.51492e+06	1.34751e+06	1.49204e+06	1.47958e+06	1.27168e+06	1.46013e+06	1.33493e+06	1.38267e+06	1.11116e+06	1.62004e+06	1.18784e+06	1.53926e+06	1.15081e+06	1.83518e+06	1.39263e+06	1.31875e+06	878629	1.77176e+06	1.45458e+06	1.51324e+06	1.46704e+06	1.58186e+06	1.02336e+06	1.46896e+06	1.94096e+06	1.60383e+06	1.18789e+06	1.54152e+06	1.41588e+06	1.27519e+06
High	NNEEYLALIFEK	[R].NNEEYLALIFEK.[G]		7.15505e-06	0.000386037	1	1	62	O00391	O00391 [183-194]		0	1482.75	12	352222	440796	363463	346293	286965	271402	271346	214554	266596	339529	470713	189989	344029	294681	335181	262953		1.18455e+06	343587	279672	288999	903260	329180	334661	1.34921e+06	307357	258414	197648	247430	255699	257013	228198	1.2277e+06	318590	241915
High	NNEGTYYSPNYNPQSR	[K].NNEGTYYSPNYNPQSR.[S]		1.15602e-12	0.000386037	1	1	652	P00450	P00450 [485-500]		0	1903.82	16	2.98637e+07	2.44336e+07	4.04301e+07	3.73469e+07	2.38676e+07	2.59517e+07	2.63496e+07	2.65458e+07	2.38408e+07	1.97353e+07	2.85804e+07	2.93004e+07	2.29232e+07	2.40933e+07	2.17696e+07	2.83208e+07	2.96936e+07	2.60459e+07	2.9241e+07	3.57453e+07	2.09897e+07	2.31835e+07	2.84681e+07	2.86065e+07	3.73684e+07	2.81045e+07	2.88543e+07	2.15866e+07	4.21547e+07	4.5883e+07	3.22085e+07	2.65127e+07	2.50599e+07	2.08679e+07	3.42544e+07
High	NNLEALEDFEK	[K].NNLEALEDFEK.[A]		0.00341631	0.000386037	1	1	3	P31025	P31025 [140-150]		0	1321.63	11		139297				1.5453e+06										161415						259587			80999.7
High	NNLELSTPLK	[R].NNLELSTPLK.[I]		0.000478125	0.000386037	1	1	181	P07225	P07225 [582-591]		0	1128.63	10	6.95276e+06	4.05033e+06	5.40982e+06	5.73231e+06	5.75924e+06	6.0309e+06	5.37075e+06	6.07881e+06	4.29465e+06	5.5012e+06	5.29682e+06	7.01107e+06	6.63604e+06	6.49469e+06	5.90983e+06	6.74057e+06	4.92873e+06	6.32943e+06	4.59344e+06	3.81817e+06	6.40472e+06	7.21654e+06	4.64568e+06	6.76214e+06	4.41593e+06	5.96975e+06	2.66597e+06	6.38642e+06	4.81391e+06	4.55646e+06	5.67905e+06	5.75422e+06	7.17714e+06	6.60071e+06	7.5261e+06
High	NNQIDHIDEK	[R].NNQIDHIDEK.[A]		0.000195689	0.000386037	1	1	181	P51884	P51884 [75-84]		0	1225.58	10	5.62642e+06	5.75604e+06	2.95659e+06	4.11024e+06	4.77948e+06	3.99348e+06	4.99037e+06	4.14863e+06	4.61117e+06	3.84933e+06	4.04713e+06	4.85074e+06	4.73278e+06	4.3628e+06	3.91532e+06	4.46657e+06	5.38267e+06	4.77424e+06	5.56792e+06	2.78193e+06	3.54593e+06	3.96462e+06	5.58882e+06	3.95302e+06	3.84358e+06	3.60625e+06	4.88698e+06	2.79584e+06	3.58838e+06	3.59497e+06	4.85981e+06	3.93488e+06	3.38707e+06	4.6293e+06	4.37443e+06
High	NPFVFAPTLLTVAVHFEEVAK	[R].NPFVFAPTLLTVAVHFEEVAK.[S]		1.56104e-17	0.000386037	1	1	178	P43652	P43652 [170-190]		0	2329.26	21	942549	1.31942e+06	1.47481e+06	1.2439e+06	1.72484e+06	2.22714e+06	1.58492e+06	1.72377e+06	1.10794e+06	3.34247e+06	2.05702e+06	564429	971837	1.32267e+06	1.42834e+06	1.01537e+06	1.09554e+06	1.47028e+06	2.08604e+06	1.34519e+06	2.04638e+06	1.91841e+06	957203	1.38546e+06	2.01657e+06	2.1294e+06	2.32547e+06	1.72816e+06	576109	1.21385e+06	1.01815e+06	962126	770266	1.68358e+06	2.91591e+06
High	NMQDMVEDYR	[K].NMQDMVEDYR.[N]	1xOxidation [M]	0.00227645	0.000386037	1	1	32	P04264	P04264 [258-267]		0	1316.52	10	193002	506003	477475	159098	5.85774e+06	3.66895e+06	1.02325e+06		1.56164e+06	4.52241e+06	3.29081e+06	1.42215e+06		686440	269400			597212	378291	969499	387684	616786	347006	148739									746839		112467
High	NPLVWVHASPEHVVVTR	[K].NPLVWVHASPEHVVVTR.[N]		2.6452e-13	0.000386037	1	1	649	Q14624	Q14624 [789-805]		0	1940.05	17	2.30157e+07	2.42183e+07	2.44438e+07	3.06056e+07	3.52415e+07	1.98417e+07	2.66459e+07	2.49959e+07	2.33336e+07	2.21241e+07	3.53068e+07	3.67328e+07	3.04581e+07	3.2553e+07	2.45323e+07	3.87946e+07	3.88016e+07	2.60581e+07	3.25929e+07	3.23265e+07	3.27632e+07	3.68947e+07	3.26632e+07	3.77786e+07	4.61086e+07	4.42452e+07	2.97638e+07	3.80529e+07	3.04119e+07	4.2981e+07	2.91307e+07	3.92933e+07	3.72135e+07	3.14153e+07	2.51931e+07
High	NPNLPPETVDSLK	[R].NPNLPPETVDSLK.[N]		2.95209e-07	0.000386037	1	1	1132	P05090	P05090 [152-164]		0	1423.74	13	7.01961e+06	1.01051e+07	1.2389e+07	9.63711e+06	9.42231e+06	1.08227e+07	6.13949e+06	1.21866e+07	9.13691e+06	7.06553e+06	1.03145e+07	7.91575e+06	7.37051e+06	5.26771e+06	6.49328e+06	1.19299e+07	9.90383e+06	1.03542e+07	6.23578e+06	7.43106e+06	2.81991e+06	5.08341e+06	7.72263e+06	8.03861e+06	8.21974e+06	8.35861e+06	7.69181e+06	6.74927e+06	7.87319e+06	1.18804e+07	1.89452e+07	1.60016e+07	8.70793e+06	6.11077e+06	6.46552e+06
High	NPSDPMPQAPALWIETTAYALLHLLLHEGK	[R].NPSDPMPQAPALWIETTAYALLHLLLHEGK.[A]		8.96928e-06	0.000386037	2	2	2	P0C0L4; P0C0L5	P0C0L4 [1249-1278]; P0C0L5 [1249-1278]		0	3326.72	30	106617			92349.8						262607								73659.9	53485.3
High	NPSDPMPQAPALWIETTAYALLHLLLHEGK	[R].NPSDPMPQAPALWIETTAYALLHLLLHEGK.[A]	1xOxidation [M6]	1.21095e-17	0.000386037	2	2	24	P0C0L4; P0C0L5	P0C0L4 [1249-1278]; P0C0L5 [1249-1278]		0	3342.72	30	276120	177810	208500	282787	144152	128801	33114.1	158461	84256.6	988861					34078.6		38316.9	220888	408332	37521.1		92393.3		22092.7		54358.2					19691.5
High	NPSSAGSWNSGSSGPGSTGNR	[R].NPSSAGSWNSGSSGPGSTGNR.[N]		1.22284e-17	0.000386037	1	1	152	P02671	P02671 [288-308]		0	1963.85	21	1.07052e+07	7.96246e+06	1.41437e+07	1.06297e+07	9.05139e+06	8.59241e+06	1.53393e+07	8.44843e+06	1.46724e+07	1.14991e+07	1.22062e+07	6.06999e+06	7.28961e+06	6.92614e+06	7.4502e+06	1.14832e+07	1.16517e+07	8.92239e+06	1.71284e+07	1.34053e+07	1.13651e+07	5.57715e+06	3.47515e+06	5.28752e+06	5.45868e+06	1.88829e+07	7.23287e+06	8.94773e+06	8.04498e+06	6.29794e+06	9.25856e+06	1.95261e+07	2.10325e+07	5.85666e+06	3.67802e+06
High	NQDVHSINLPFFETLQEYFER	[K].NQDVHSINLPFFETLQEYFER.[N]		6.38685e-16	0.000386037	1	1	468	P04114	P04114 [2063-2083]		0	2626.26	21	4.24821e+06	1.10177e+07	7.19719e+06	1.32746e+07	1.22805e+07	1.06266e+07	9.49698e+06	1.5427e+07	1.12314e+07	1.59534e+07	1.02988e+07	5.137e+06	1.5676e+07	1.3025e+07	1.94442e+07	1.66769e+07	8.43911e+06	1.091e+07	1.54908e+07	1.44304e+07	1.71212e+07	1.74913e+07	1.03543e+07	9.65059e+06	1.16158e+07	1.94544e+07	1.57349e+07	2.11298e+07	9.25405e+06	8.45982e+06	1.12451e+07	1.27678e+07	8.66585e+06	2.0065e+07	9.45293e+06
High	NQFNDYTSK	[K].NQFNDYTSK.[K]		0.0102795	0.000386037	1	1	90	P06276	P06276 [587-595]		0	1116.5	9	1.13949e+06	920662	1.48433e+06	1.14542e+06	775114	895416	599896	656016	703490	907616	999112	172588	1.14408e+06	944958	1.48794e+06	276768	781824	1.35601e+06	869928	770428	820866	904269	529382	509787	612506	770049	746953	532946	687869	1.01337e+06	662158	908807	456402	581932	314018
High	NQGNTWLTAFVLK	[R].NQGNTWLTAFVLK.[T]		2.3699e-10	0.000386037	2	2	389	P01023; P20742	P01023 [1035-1047]; P20742 [1041-1053]		0	1491.8	13	2.80615e+07	2.89125e+07	1.85983e+07	3.18231e+07	2.41783e+07	1.72307e+07	2.46475e+07	2.12697e+07	2.93606e+07	1.72863e+07	3.34184e+07	1.57275e+07	2.09554e+07	1.58584e+07	1.49739e+07	2.32145e+07	1.62265e+07	2.87089e+07	1.99267e+07	2.90422e+07	2.05993e+07	1.74873e+07	2.35842e+07	2.62682e+07	2.60695e+07	2.46589e+07	2.21082e+07	1.97549e+07	2.63766e+07	2.01883e+07	2.94584e+07	3.44925e+07	2.5414e+07	2.68321e+07	1.84724e+07
High	NQILNLTTDNANILLQIDNAR	[K].NQILNLTTDNANILLQIDNAR.[L]		6.82215e-17	0.000386037	1	1	43	P13645	P13645 [208-228]		0	2367.26	21	353436	985897	1.00163e+06	624171	3.61835e+06	3.59356e+06	469766		607064	2.66571e+06	2.43224e+06	262734		848267	307018		191380	880891	1.78022e+06	390520	853301	411371	249077	265779	150001	397203	298960						167345		469125
High	NPNGYSFSIPVK	[K].NPNGYSFSIPVK.[V]		5.33778e-06	0.000386037	1	1	246	P04114	P04114 [3713-3724]		0	1322.67	12	1.58301e+07	2.46961e+07	1.75647e+07	2.32592e+07	2.50906e+07	2.70588e+07	2.03529e+07	2.92818e+07	3.06659e+07	2.43486e+07	1.63795e+07	2.288e+07	3.1544e+07	2.31403e+07	3.22525e+07	2.93546e+07	2.15197e+07	1.78614e+07	2.71608e+07	2.37981e+07	2.599e+07	3.90116e+07	1.99061e+07	2.03583e+07	2.14483e+07	2.48085e+07	2.5147e+07	2.82062e+07	2.85063e+07	1.62287e+07	2.085e+07	2.73816e+07	1.21811e+07	3.60809e+07	2.74064e+07
High	QGYFVEAQPK	[R].QGYFVEAQPK.[I]		6.18474e-05	0.000386037	1	1	376	P02743	P02743 [140-149]		0	1166.58	10	3.4369e+07	2.58508e+07	3.21555e+07	3.47776e+07	3.7589e+07	1.92655e+07	2.10593e+07	4.29285e+07	4.58802e+07	3.1662e+07	1.92364e+07	4.13944e+07	3.41696e+07	3.17707e+07	4.19198e+07	2.32249e+07	2.50567e+07	1.92483e+07	2.83307e+07	2.11251e+07	3.42741e+07	3.05742e+07	1.69296e+07	2.56083e+07	3.02034e+07	1.85065e+07	1.69442e+07	2.46917e+07	2.20272e+07	1.79252e+07	2.90671e+07	2.60306e+07	2.41765e+07	2.96879e+07	2.49483e+07
High	NMEVSVATTTK	[K].NMEVSVATTTK.[A]	1xOxidation [M2]	1.87031e-06	0.000386037	1	1	384	P04114	P04114 [3420-3430]		0	1196.58	11	7.57141e+06	1.27941e+07	2.18322e+07	1.0447e+07	1.12722e+07	1.33522e+07	8.1178e+06	1.47163e+07	1.3401e+07	1.27341e+07	7.7354e+06	7.38254e+06	1.40123e+07	9.87018e+06	1.55478e+07	8.84525e+06	1.19462e+07	8.57991e+06	1.41209e+07	1.13073e+07	9.24062e+06	1.1108e+07	1.0515e+07	6.06956e+06	7.09579e+06	9.83443e+06	1.31409e+07	9.95775e+06	1.35998e+07	5.22076e+06	1.20065e+07	9.83103e+06	5.32623e+06	1.1495e+07	8.56969e+06
High	NMEQFQVSVSVAPNAK	[R].NMEQFQVSVSVAPNAK.[I]	1xOxidation [M2]	7.4126e-15	0.000386037	1	1	801	Q14624	Q14624 [124-139]		0	1764.86	16	9.44553e+06	1.17056e+07	1.23422e+07	1.88954e+07	1.47554e+07	1.1299e+07	1.21739e+07	9.1035e+06	8.67487e+06	8.95406e+06	1.38996e+07	1.1414e+07	1.24598e+07	1.36502e+07	7.93221e+06	1.65783e+07	1.51878e+07	1.28646e+07	1.37184e+07	1.1216e+07	1.19527e+07	1.34078e+07	1.45385e+07	1.53868e+07	1.42865e+07	1.60594e+07	1.3905e+07	1.48271e+07	1.13636e+07	1.53731e+07	1.14397e+07	1.25493e+07	1.32133e+07	1.15087e+07	1.2068e+07
High	NLELGLTQGSFAFIHK	[R].NLELGLTQGSFAFIHK.[D]		1.66283e-05	0.000386037	1	1	5	Q9UK55	Q9UK55 [155-170]		0	1774.95	16			380197		275045	353668			117731	680899		206138	161303	647247	659974	146081	272618	500386	745260	363959	252182	246448	344147		823199	226554		616037	349390	734589		257831	433065	371990	551934
High	NLEPLFETYLSVLR	[K].NLEPLFETYLSVLR.[K]		0.000227164	0.000386037	1	1	1	P19013	P19013 [197-210]		0	1693.92	14			115558
High	NLIAAVAPGAFLGLK	[R].NLIAAVAPGAFLGLK.[A]		8.37484e-09	0.000386037	1	1	165	P35858	P35858 [252-266]		0	1454.87	15	1.23712e+06	751167	1.25769e+06	1.12411e+06	1.31883e+06	1.17933e+06	1.03951e+06	1.14676e+06	612151	1.29073e+06	863626	1.1047e+06	1.39472e+06	1.28783e+06	1.72085e+06	1.31521e+06	977730	1.15562e+06	1.61133e+06	1.11425e+06	1.37949e+06	1.35058e+06	1.50376e+06	1.40651e+06	1.01405e+06	1.82197e+06	1.65558e+06	1.57721e+06	1.23749e+06	1.58064e+06	823949	1.25192e+06	1.19837e+06	1.30264e+06
High	NILDRQDPPSVVVTSHQAPGEK	[K].NILDRQDPPSVVVTSHQAPGEK.[K]		6.00852e-13	0.000386037	1	1	120	P25311	P25311 [199-220]		1	2387.23	22	5.10152e+06	4.31054e+06	5.38782e+06	2.77061e+06	9.63864e+06	6.43634e+06	4.32089e+06	5.49968e+06	5.58423e+06	5.96577e+06	3.75272e+06	4.80134e+06	6.27381e+06	3.64869e+06	3.53503e+06	3.67773e+06	3.88512e+06	3.05657e+06	4.45291e+06	4.19933e+06	5.22894e+06	3.60272e+06	4.30103e+06	4.10273e+06	3.92694e+06	5.46693e+06	3.56192e+06	4.88061e+06	4.25747e+06	3.94688e+06	4.5851e+06	6.90531e+06	6.04526e+06	5.78547e+06	3.61422e+06
High	NIIFVETSFTTLETR	[K].NIIFVETSFTTLETR.[A]		8.72996e-12	0.000386037	1	1	65	P22792	P22792 [53-67]		0	1770.93	15	771401	1.26878e+06	988497	1.53577e+06	1.16008e+06	1.71634e+06	1.49095e+06	1.4712e+06	1.28218e+06	2.20245e+06	1.8053e+06	781992	1.92525e+06	1.58926e+06	2.03591e+06	1.59172e+06	1.47708e+06	1.33887e+06	1.42803e+06	1.33964e+06	1.57161e+06	1.1395e+06	1.46128e+06	1.94864e+06	1.08703e+06	1.96257e+06	2.39098e+06	1.64131e+06	719416	2.05728e+06	1.51606e+06	1.26668e+06	1.62618e+06	1.77111e+06	1.8224e+06
High	NILFVIDVSGSMWGVK	[K].NILFVIDVSGSMWGVK.[M]		7.93692e-11	0.000386037	1	1	20	P19823	P19823 [310-325]		0	1764.94	16	61384.7			203283		102780		93382.6		280065									83979.3							107837
High	NILFVIDVSGSMWGVK	[K].NILFVIDVSGSMWGVK.[M]	1xOxidation [M12]	2.83928e-12	0.000386037	1	1	125	P19823	P19823 [310-325]		0	1780.93	16	507888	1.21823e+06	1.32246e+06	2.27358e+06	829215	1.65845e+06	1.11833e+06	1.34424e+06	913165	2.4852e+06	1.34978e+06	403587	653414	690187	1.56091e+06	1.2029e+06	708735	1.79035e+06	2.24037e+06	1.07788e+06	1.04652e+06	996749	483327	1.36242e+06	1.60729e+06	3.5163e+06	2.01633e+06	838030	437962	759265	1.00108e+06	613427	398090	712819	2.31137e+06
High	NIILPVYDK	[K].NIILPVYDK.[S]		0.00375436	0.000386037	1	1	348	P04114	P04114 [3674-3682]		0	1074.62	9	1.68178e+07	2.37067e+07	2.27923e+07	2.08888e+07	2.3111e+07	2.4375e+07	1.83109e+07	2.96772e+07	2.70767e+07	2.34229e+07	1.47164e+07	2.13785e+07	2.75588e+07	2.55293e+07	3.17805e+07	2.80688e+07	2.28894e+07	1.89267e+07	2.59116e+07	2.24905e+07	2.38346e+07	3.74233e+07	1.87541e+07	1.92608e+07	1.86787e+07	2.23912e+07	2.55607e+07	2.97848e+07	2.62247e+07	1.55673e+07	2.24395e+07	2.63757e+07	1.31416e+07	3.6356e+07	2.52578e+07
High	NMEVSVATTTK	[K].NMEVSVATTTK.[A]		2.30069e-05	0.000386037	1	1	133	P04114	P04114 [3420-3430]		0	1180.59	11	1.31194e+06	2.73541e+06	2.75247e+06	2.43281e+06	2.60268e+06	3.99941e+06	2.07891e+06	4.96014e+06	3.45773e+06	3.01279e+06	1.77062e+06	2.02572e+06	3.36501e+06	3.69825e+06	3.84196e+06	2.12002e+06	1.91498e+06	2.44509e+06	1.84164e+06	3.56274e+06	2.15682e+06	4.40034e+06	2.65457e+06	1.91485e+06	1.50019e+06	1.29008e+06	2.68416e+06	3.02917e+06	1.6255e+06	1.06678e+06	1.74935e+06	2.84482e+06	1.8416e+06	3.59905e+06	2.63525e+06
High	NILTSNNIDVK	[K].NILTSNNIDVK.[K]		1.38007e-05	0.000386037	1	1	203	P05090	P05090 [165-175]		0	1230.67	11	4.0806e+07	3.87151e+07	3.24733e+07	3.44385e+07	5.42639e+07	4.71395e+07	4.95803e+07	5.46384e+07	3.86757e+07	3.75171e+07	2.59383e+07	4.54984e+07	4.46707e+07	3.97156e+07	3.32124e+07	4.44475e+07	4.03123e+07	3.02852e+07	2.20016e+07	2.75563e+07	3.04029e+07	2.14875e+07	4.9459e+07	3.70448e+07	2.82742e+07	3.65861e+07	2.83585e+07	2.52195e+07	4.45363e+07	4.42542e+07	6.62224e+07	4.25306e+07	3.67358e+07	4.26073e+07	4.33088e+07
High	NIPTVNENLENYYLEVNQLEK	[K].NIPTVNENLENYYLEVNQLEK.[F]		3.36857e-14	0.000386037	1	1	276	P51884	P51884 [268-288]		0	2536.26	21	4.16786e+06	4.01683e+06	2.18185e+06	3.17308e+06	3.39056e+06	4.0528e+06	3.31817e+06	2.77926e+06	4.048e+06	3.28918e+06	3.08529e+06	3.17193e+06	4.29451e+06	3.82325e+06	3.02703e+06	3.6882e+06	4.70539e+06	3.8595e+06	3.73247e+06	2.35156e+06	2.75139e+06	3.96215e+06	4.61227e+06	3.37772e+06	3.42262e+06	2.73355e+06	3.74253e+06	2.88078e+06	2.3247e+06	3.18781e+06	2.91704e+06	2.88248e+06	2.4643e+06	4.74064e+06	4.81362e+06
High	NIQEYLSILTDPDGK	[R].NIQEYLSILTDPDGK.[G]		8.31387e-12	0.000386037	1	1	405	P04114	P04114 [4447-4461]		0	1705.86	15	9.3372e+06	1.56534e+07	1.5502e+07	1.7196e+07	1.30427e+07	1.78747e+07	1.1719e+07	1.84388e+07	1.1723e+07	1.46993e+07	1.08329e+07	1.01695e+07	2.74411e+07	1.66816e+07	2.77272e+07	2.01377e+07	1.03988e+07	1.32615e+07	2.19092e+07	1.25004e+07	1.91236e+07	2.08059e+07	1.74715e+07	1.3628e+07	1.38176e+07	1.42114e+07	2.0141e+07	1.95251e+07	1.42947e+07	1.25186e+07	1.23e+07	1.50739e+07	9.63844e+06	2.51338e+07	2.17567e+07
High	NLQNNAEWVYQGAIR	[R].NLQNNAEWVYQGAIR.[Q]		1.25302e-11	0.000386037	1	1	228	P04114	P04114 [4107-4121]		0	1775.88	15	7.53747e+06	1.17661e+07	9.3512e+06	1.25919e+07	1.03556e+07	1.34345e+07	9.29021e+06	1.62008e+07	1.20686e+07	1.08662e+07	8.4988e+06	8.7959e+06	1.48428e+07	1.11002e+07	1.58784e+07	1.21678e+07	9.08549e+06	7.33872e+06	1.34291e+07	1.04717e+07	1.08884e+07	1.49595e+07	7.64032e+06	8.31822e+06	8.58807e+06	1.03827e+07	1.11312e+07	1.09671e+07	1.15682e+07	6.81023e+06	8.58058e+06	1.19699e+07	6.63209e+06	1.58207e+07	1.07301e+07
High	NLQPASEYTVSLVAIK	[R].NLQPASEYTVSLVAIK.[G]		2.97405e-09	0.000386037	1	1	523	P02751	P02751 [1055-1070]		0	1732.95	16	2.02174e+07	1.77289e+07	4.39933e+07	2.35884e+07	1.10337e+07	1.96968e+07	2.76607e+07	2.29283e+07	2.12081e+07	2.065e+07	1.52856e+07	1.79819e+07	1.46838e+07	1.52554e+07	1.62915e+07	1.3198e+07	2.24246e+07	2.342e+07	1.26165e+07	2.49951e+07	2.1981e+07	2.18868e+07	1.12226e+07	2.30131e+07	1.64006e+07	1.85985e+07	1.27246e+07	2.97367e+07	2.13258e+07	1.40415e+07	2.85619e+07	2.10358e+07	2.09616e+07	1.23002e+07	2.1132e+07
High	NISDGFDGIPDNVDAALALPAHSYSGR	[R].NISDGFDGIPDNVDAALALPAHSYSGR.[E]		5.44708e-05	0.000386037	1	1	3	P04004	P04004 [242-268]		0	2772.32	27
High	NLTDFAEQYSIQDWAK	[K].NLTDFAEQYSIQDWAK.[R]		1.34172e-15	0.000386037	1	1	483	P04114	P04114 [2560-2575]		0	1928.9	16	1.40413e+07	2.0252e+07	1.50278e+07	1.9943e+07	1.6025e+07	2.48314e+07	1.41328e+07	3.10737e+07	2.27713e+07	2.10004e+07	1.27711e+07	1.69729e+07	2.92202e+07	2.00392e+07	3.00343e+07	2.0018e+07	1.76409e+07	1.48686e+07	2.26583e+07	2.01812e+07	2.07927e+07	2.59981e+07	1.59369e+07	1.54719e+07	1.44889e+07	1.78685e+07	2.12741e+07	2.22493e+07	1.70333e+07	1.29143e+07	1.50411e+07	1.92457e+07	1.16314e+07	2.86981e+07	1.90998e+07
High	NMATRPYSIHAHGVQTESSTVTPTLPGETLTYVWK	[K].NMATRPYSIHAHGVQTESSTVTPTLPGETLTYVWK.[I]	1xOxidation [M2]	9.70452e-05	0.000386037	1	1	13	P00450	P00450 [826-860]		0	3888.92	35	162312	333174	204926				319960	377772	388832		656263	183237				397545	319230	284350	948592	701761	524869			97284.5	472328	1.21661e+06	331353	256148	579972	527864		1.89692e+06	1.05184e+06	233399	234240
High	NMEQFQVSVSVAPNAK	[R].NMEQFQVSVSVAPNAK.[I]		8.72996e-12	0.000386037	1	1	240	Q14624	Q14624 [124-139]		0	1748.86	16	2.1643e+06	2.23189e+06	1.2009e+06	2.9651e+06	2.80152e+06	2.37941e+06	3.0084e+06	2.54896e+06	2.06781e+06	2.44124e+06	2.86408e+06	2.47062e+06	3.16009e+06	3.16953e+06	2.08542e+06	2.42326e+06	2.61238e+06	2.61148e+06	1.83192e+06	2.81078e+06	2.88875e+06	3.6948e+06	3.30995e+06	3.62256e+06	3.9325e+06	2.18018e+06	2.63141e+06	3.7362e+06	1.36001e+06	3.67379e+06	1.70235e+06	2.42695e+06	2.54704e+06	3.53381e+06	3.28213e+06
High	NILTSNNIDVKK	[K].NILTSNNIDVKK.[M]		0.000113993	0.000386037	1	1	6	P05090	P05090 [165-176]		1	1358.76	12		251691	95758.8	168795	172593	170823	450419	381525	222115		166925	264373	272794	208989	355030	366483	247627	169175	220207	341339	198996	145443	183781	185808	204259	320147	275101	161276	217425	323522	404766	574345	549448	344492	154090
High	MYQMDIQQELQR	[R].MYQMDIQQELQR.[Y]		1.77932e-07	0.000386037	1	1	106	P04114	P04114 [2523-2534]		0	1582.74	12	653355	663091	317959	1.06353e+06	708616	1.55547e+06	860974	2.17712e+06	1.55275e+06	795247	656332	1.03948e+06	1.98194e+06	1.8389e+06	4.0008e+06	1.13007e+06	677576	977984		1.92117e+06	1.86573e+06	2.78038e+06	3.7343e+06	1.08959e+06	713603		1.32248e+06	1.33964e+06	1.02858e+06	2.27454e+06	2.05783e+06	2.25424e+06	1.30235e+06	3.25936e+06	1.50801e+06
High	QHVVSVEEALLATGQWK	[K].QHVVSVEEALLATGQWK.[S]		3.55433e-08	0.000386037	1	1	46	P07996	P07996 [138-154]		0	1895	17	122512	158442	302906	278373	353718	75995.1	58262.5	227573	132012		71500.4	84549.4	59139.8	139209	84855.4	83436.7	250580	288028	123373	375122	141624	134823	149934	738027	148652	175398	344119	418733	272433	325837	104153	84479.1	128360	211939	84820.5
High	QKPDGVFQEDAPVIHQEMIGGLR	[K].QKPDGVFQEDAPVIHQEMIGGLR.[N]	1xOxidation [M18]	6.27841e-11	0.000386037	1	1	1355	P01024	P01024 [1112-1134]		0	2580.29	23	9.50194e+07	1.09246e+08	9.13114e+07	8.68682e+07	1.05343e+08	7.74927e+07	8.9902e+07	7.16558e+07	9.38652e+07	9.92228e+07	1.20172e+08	1.1456e+08	9.33224e+07	1.03441e+08	1.01789e+08	1.26447e+08	1.15989e+08	1.0411e+08	1.1724e+08	7.75119e+07	1.1894e+08	1.13455e+08	6.06314e+07	9.12102e+07	1.18782e+08	1.23182e+08	1.03639e+08	1.15852e+08	1.01628e+08	9.64825e+07	9.05264e+07	9.14986e+07	1.03643e+08	7.19162e+07	6.00467e+07
High	SELTQQLNALFQDK	[K].SELTQQLNALFQDK.[L]		7.54025e-12	0.000386037	1	1	432	P06727	P06727 [52-65]		0	1634.84	14	3.59664e+07	3.27729e+07	3.0234e+07	2.50497e+07	4.13811e+07	3.46006e+07	2.88013e+07	2.99626e+07	2.5752e+07	3.65202e+07	2.48433e+07	4.23581e+07	4.31007e+07	3.84259e+07	3.35035e+07	4.0295e+07	2.85652e+07	2.56343e+07	3.26503e+07	3.17433e+07	3.17846e+07	2.40952e+07	3.21997e+07	2.79004e+07	5.1304e+07	1.97453e+07	2.21608e+07	3.30263e+07	3.11783e+07	2.51978e+07	1.84207e+07	3.67893e+07	3.27631e+07	3.5742e+07	3.89303e+07
High	SENINHNSAFK	[R].SENINHNSAFK.[Q]		3.00637e-05	0.000386037	1	1	38	P13671	P13671 [290-300]		0	1260.6	11	1.07902e+06	581966	1.06675e+06	977052		321962		708801	797686		767429	847849		1.44906e+06		3.52719e+06	888773	688648	545941			832186		741008	527206	814952		604161		728223		547851	644882		855702
High	SETAEELKK	[K].SETAEELKK.[V]		0.00570812	0.000386037	1	1	241	O14791	O14791 [365-373]		1	1034.54	9	2.3041e+06	2.57228e+06	3.05072e+06	2.43032e+06	1.70242e+06	2.84352e+06	1.32782e+06	2.06681e+06	1.27439e+06	2.21385e+06	1.29292e+06	1.76623e+06	2.58884e+06	2.10157e+06	2.22669e+06	2.25683e+06	2.09861e+06	1.9428e+06	2.52755e+06	2.36473e+06	2.18307e+06	2.33056e+06	3.16875e+06	1.16109e+06	2.40561e+06	2.41662e+06	3.08747e+06	2.07294e+06	2.54337e+06	3.51463e+06	1.93756e+06	1.57582e+06	1.89313e+06	2.16184e+06	1.64804e+06
High	SETEIHQGFQHLHQLFAK	[R].SETEIHQGFQHLHQLFAK.[S]		8.49876e-15	0.000386037	1	1	378	P08185	P08185 [101-118]		0	2150.08	18	6.65511e+06	8.71177e+06	1.1454e+07	7.51568e+06	6.70533e+06	6.818e+06	7.89879e+06	6.09755e+06	6.60984e+06	8.7825e+06	7.06666e+06	8.17583e+06	7.15382e+06	8.9836e+06	7.33392e+06	7.86197e+06	1.00033e+07	8.1958e+06	8.51222e+06	1.14097e+07	7.46546e+06	9.07241e+06	9.50586e+06	8.94622e+06	1.41385e+07	1.04887e+07	7.11811e+06	7.37139e+06	1.1497e+07	1.68441e+07	8.64721e+06	7.26249e+06	7.87994e+06	8.33123e+06	8.62743e+06
High	SEYGAALAWEK	[R].SEYGAALAWEK.[G]		0.00057672	0.000386037	1	1	7	P13671	P13671 [449-459]		0	1224.59	11	5.74926e+06	3.03559e+06	2.21096e+06	4.59313e+06	3.19538e+06	2.86546e+06	2.70552e+06	2.65306e+06	3.83026e+06	3.00371e+06	3.91336e+06	4.55153e+06	2.50026e+06	4.33416e+06	1.86322e+06	4.35163e+06	4.50719e+06	4.0028e+06	3.79458e+06	2.53002e+06	3.6723e+06	5.13793e+06	1.93734e+06	4.15712e+06	3.85527e+06	4.3937e+06	3.09393e+06	3.45812e+06	3.90425e+06	3.77509e+06	3.26995e+06	3.25795e+06	3.66723e+06	3.65999e+06	3.37727e+06
High	SEYQADYESLR	[R].SEYQADYESLR.[F]		3.45062e-05	0.000386037	1	1	184	P04114	P04114 [1600-1610]		0	1360.6	11	2.07588e+07	2.71764e+07	3.01702e+07	2.29603e+07	2.31079e+07	2.81897e+07	1.7927e+07	3.21411e+07	3.06372e+07	2.11802e+07	1.72604e+07	1.76557e+07	2.95004e+07	2.77568e+07	3.36047e+07	2.38474e+07	2.44323e+07	1.99782e+07	2.4043e+07	2.42591e+07	2.13895e+07	2.98457e+07	1.85703e+07	1.84983e+07	1.48176e+07	2.13992e+07	2.34821e+07	2.64977e+07	2.61918e+07	1.2326e+07	2.36478e+07	2.63405e+07	1.58113e+07	3.17528e+07	2.4625e+07
High	SFAAGIQALGGTNINDAMLMAVQLLDSSNQEER	[R].SFAAGIQALGGTNINDAMLMAVQLLDSSNQEER.[L]		8.65906e-07	0.000386037	1	1	47	Q14624	Q14624 [339-371]		0	3464.68	33	39133.8	211068		315556	182582	298858	175082	238388	111403	259336	160977			47954.4	65200.8		51633.6	76187.7	107808	121277	125672	95147.6		87151.5	124367	226644	77605.9			47474.4				80136.1	256189
High	SFAAGIQALGGTNINDAMLMAVQLLDSSNQEER	[R].SFAAGIQALGGTNINDAMLMAVQLLDSSNQEER.[L]	1xOxidation [M]	5.00301e-12	0.000386037	1	1	148	Q14624	Q14624 [339-371]		0	3480.67	33	341446	1.33581e+06	745283	1.66503e+06	1.05655e+06	1.28916e+06	983565	966813	705951	1.09315e+06	1.25355e+06	657330	647777	931391	1.20578e+06	1.35286e+06	783603	700403	2.38854e+06	1.10047e+06	1.14988e+06	946526	750641	1.1662e+06	1.62975e+06	1.9896e+06	1.28969e+06	1.14147e+06	200286	1.25791e+06	692128	604592	524458	1.29351e+06	1.83919e+06
High	SFAAGIQALGGTNINDAMLMAVQLLDSSNQEER	[R].SFAAGIQALGGTNINDAMLMAVQLLDSSNQEER.[L]	2xOxidation [M18; M20]	2.90943e-10	0.000386037	1	1	90	Q14624	Q14624 [339-371]		0	3496.67	33	453455	1.01046e+06	856545	1.27682e+06	910117	785660	1.45318e+06	739999	561476	1.73688e+06	1.24825e+06	565237	853310	678130	1.18399e+06	1.62203e+06	1.22982e+06	1.10508e+06	2.38638e+06	1.34135e+06	1.48124e+06	1.17719e+06	845179	1.10758e+06	1.67853e+06	1.94711e+06	1.75267e+06	1.37907e+06	805930	1.31705e+06	1.00221e+06	571347	431721	1.15275e+06	867593
High	SFDYHQFVDETNDK	[K].SFDYHQFVDETNDK.[I]		2.06205e-15	0.000386037	1	1	620	P04114	P04114 [2429-2442]		0	1744.74	14	2.26411e+07	3.42157e+07	3.38047e+07	3.51134e+07	2.63577e+07	3.68904e+07	2.41149e+07	4.47348e+07	3.73205e+07	2.80817e+07	3.03105e+07	4.048e+07	5.76159e+07	4.62385e+07	4.65821e+07	5.28648e+07	4.17551e+07	3.3305e+07	3.47155e+07	3.07375e+07	3.47309e+07	4.92704e+07	3.90514e+07	3.19091e+07	2.96484e+07	3.50191e+07	3.41173e+07	4.50489e+07	4.6677e+07	2.89694e+07	3.56913e+07	4.31537e+07	2.60525e+07	4.34317e+07	3.4996e+07
High	SFEGLGQLEVLTLDHNQLQEVK	[R].SFEGLGQLEVLTLDHNQLQEVK.[A]		2.61956e-17	0.000386037	1	1	188	P35858	P35858 [333-354]		0	2497.29	22	3.85856e+06	2.02487e+06	3.51457e+06	3.09235e+06	4.30372e+06	4.41103e+06	3.00772e+06	3.41383e+06	2.21325e+06	4.21307e+06	3.34995e+06	3.28841e+06	4.26311e+06	4.44538e+06	5.35276e+06	4.12274e+06	4.40453e+06	3.35298e+06	4.45529e+06	4.50214e+06	3.82663e+06	3.42672e+06	4.31371e+06	3.27764e+06	2.84715e+06	5.26224e+06	5.72432e+06	4.14194e+06	4.03025e+06	4.86545e+06	2.38498e+06	3.30487e+06	3.6151e+06	3.45992e+06	3.2871e+06
High	SFFPENWLWR	[R].SFFPENWLWR.[V]		0.000180784	0.000386037	2	2	378	P0C0L4; P0C0L5	P0C0L4 [776-785]; P0C0L5 [776-785]		0	1381.67	10	1.26725e+07	9.64598e+06	6.18885e+06	1.54913e+07	7.61771e+06	7.08957e+06	5.98331e+06	1.38214e+07	8.45797e+06	1.063e+07	9.19445e+06	9.74441e+06	9.46846e+06	1.14765e+07	9.95594e+06	9.28019e+06	9.25226e+06	1.48051e+07	1.30056e+07	9.66576e+06	9.64035e+06	1.13512e+07	1.96541e+06	9.78865e+06	1.77769e+07	7.0639e+06	1.02973e+07	9.25555e+06	6.14307e+06	5.75408e+06	6.98991e+06	8.55082e+06	8.84634e+06	1.10237e+07	4.92293e+06
High	SFFSFLGEAFDGAR	[R].SFFSFLGEAFDGAR.[D]		1.35152e-08	0.000386037	2	2	48	P0DJI9; P0DJI8	P0DJI9 [20-33]; P0DJI8 [20-33]		0	1550.73	14	155246	411865	428673	593827	367276		222793	89927	267290	1.48922e+06	295746	198234	130064	400710		717064	150069	108020	306478		306031	270930	130116	732453	880928	578400	256274	381134	49053.8	358243		407966	717532	660486	139875
High	SFNPNSPGK	[K].SFNPNSPGK.[I]		0.0120009	0.000386037	1	1	216	P27169	P27169 [76-84]		0	947.458	9	4.68158e+06	4.33188e+06	8.92947e+06	4.87378e+06	5.09939e+06	6.232e+06	3.84924e+06	5.8066e+06	5.98395e+06	3.94937e+06	4.12957e+06	5.63974e+06	4.51983e+06	4.70634e+06	6.97286e+06	5.16515e+06	7.00754e+06	4.69388e+06	6.51753e+06	6.28859e+06	3.6239e+06	4.02611e+06	7.58397e+06	3.93863e+06	4.8007e+06	6.07042e+06	8.87844e+06	4.91169e+06	7.15294e+06	8.12848e+06	4.59825e+06	5.42053e+06	4.36494e+06	4.79314e+06	4.65289e+06
High	SFVHLEPMSHELPCGHTQTVQAHYILNGGTLLGLK	[K].SFVHLEPMSHELPCGHTQTVQAHYILNGGTLLGLK.[K]	1xCarbamidomethyl [C14]; 1xOxidation [M8]	0.000295086	0.000386037	1	1	11	P01023	P01023 [457-491]		0	3900.95	35																														843998
High	SFYANNHCIGTDLNR	[R].SFYANNHCIGTDLNR.[N]	1xCarbamidomethyl [C8]	0.000166985	0.000386037	1	1	33	Q96IY4	Q96IY4 [243-257]		0	1781.8	15	282475	277033	261360	224764	305369	357232	282965	465616	299184	139681	341780	305144		251758	247980	214798		226919	317623	282524	279210	261125	404535	312666	160094	258090	226540		230199	232315	252484	416156	275025	377610	186972
High	SGAGTEDSACIPWAYYSTVDQVK	[R].SGAGTEDSACIPWAYYSTVDQVK.[D]	1xCarbamidomethyl [C10]	1.04333e-10	0.000386037	1	1	280	P00450	P00450 [865-887]		0	2505.12	23	2.23718e+06	2.87095e+06	2.93759e+06	3.75337e+06	2.19051e+06	2.16612e+06	2.28741e+06	3.09146e+06	2.20559e+06	2.09729e+06	2.74422e+06	2.80424e+06	2.41629e+06	2.34774e+06	2.32741e+06	2.26985e+06	2.49115e+06	2.47725e+06	2.57206e+06	3.90677e+06	2.08961e+06	2.26539e+06	2.09528e+06	2.51955e+06	3.5282e+06	2.4585e+06	2.44364e+06	1.98123e+06	3.27123e+06	3.73848e+06	2.14961e+06	1.84076e+06	2.05165e+06	2.15568e+06	2.88036e+06
High	SEILAHWSPAK	[R].SEILAHWSPAK.[L]		9.53073e-08	0.000386037	1	1	587	P04114	P04114 [1135-1145]		0	1238.65	11	2.39196e+07	3.26922e+07	3.21538e+07	2.69963e+07	2.32151e+07	2.80825e+07	2.26641e+07	3.62766e+07	3.12345e+07	1.97678e+07	1.91127e+07	2.25219e+07	3.10612e+07	2.98254e+07	2.65544e+07	3.20286e+07	2.78601e+07	2.22972e+07	2.19321e+07	1.66828e+07	2.10785e+07	2.70258e+07	2.27193e+07	1.97434e+07	1.61832e+07	2.13086e+07	2.14027e+07	2.73134e+07	2.47665e+07	1.41469e+07	2.43605e+07	2.65148e+07	1.72382e+07	2.6721e+07	2.88245e+07
High	SELEEQLTPVAEETR	[K].SELEEQLTPVAEETR.[A]		4.93031e-14	0.000386037	1	1	596	P02649	P02649 [94-108]		0	1730.84	15	2.86356e+07	2.2441e+07	1.72693e+07	3.57146e+07	2.02933e+07	2.35995e+07	1.93761e+07	2.3165e+07	2.5981e+07	1.9552e+07	1.82931e+07	2.64412e+07	2.66076e+07	1.88532e+07	2.94256e+07	2.55973e+07	2.44566e+07	2.32375e+07	2.73704e+07	1.61484e+07	6.94691e+07	2.8373e+07	2.28953e+07	4.11443e+07	2.30586e+07	2.45953e+07	2.03132e+07	2.25242e+07	2.31458e+07	1.59172e+07	3.21185e+07	1.85899e+07	1.5594e+07	2.27751e+07	2.23227e+07
High	SEFPESWLWNVEDLKEPPK	[R].SEFPESWLWNVEDLKEPPK.[N]		4.75146e-07	0.000386037	1	1	44	P01024	P01024 [765-783]		1	2330.13	19	201890	219665	207122	599567	350382	223836	960623		1.02299e+06	873519	499662		818251	405457	375353	353332	613243	650134	1.77422e+06	1.02253e+06	1.7373e+06	802970		334548	1.73573e+06	1.0209e+06	1.5487e+06	853952	579554	1.00688e+06	861945	380326	1.1369e+06	1.50668e+06
High	SEFPESWLWNVEDLK	[R].SEFPESWLWNVEDLK.[E]		8.39547e-12	0.000386037	1	1	1404	P01024	P01024 [765-779]		0	1878.89	15	2.95306e+07	4.10215e+07	2.71245e+07	3.02668e+07	2.96162e+07	2.36425e+07	2.58029e+07	3.22028e+07	2.45405e+07	2.83615e+07	3.04876e+07	3.18115e+07	3.09114e+07	3.88279e+07	3.7643e+07	4.04484e+07	2.70464e+07	3.19487e+07	4.52211e+07	3.69652e+07	3.08941e+07	3.35696e+07	1.8508e+07	2.96893e+07	4.54199e+07	3.57986e+07	3.54642e+07	2.78357e+07	2.33646e+07	2.23202e+07	2.59437e+07	1.96356e+07	2.93787e+07	3.02677e+07	2.96126e+07
High	SDDTAVYYCAR	[R].SDDTAVYYCAR.[-]	1xCarbamidomethyl [C9]	7.27782e-05	0.000386037	2	2	71	P23083; A0A0C4DH31	P23083 [107-117]; A0A0C4DH31 [107-117]		0	1320.55	11	517476	706985			601629		556566	514635		910620		631594							519946	782819	1.00914e+06	727642			841098	390343	456068	546798	914958		417784	521041		482531	1.25469e+06
High	SDFYDIVLVATPLNR	[R].SDFYDIVLVATPLNR.[K]		9.05399e-06	0.000386037	1	1	4	Q9UHG3	Q9UHG3 [305-319]		0	1722.91	15	110744		197131	182242	186044	141197			113569				143557	126435	278534		92976.3				241766			147236				207712	105587				101569
High	SDIEIENGFISESSSIYILNK	[K].SDIEIENGFISESSSIYILNK.[E]		4.02582e-13	0.000386037	1	2	13	Q02985	Q02985 [149-169]		0	2358.17	21																						99478.8
High	SDLEMQYETLQEELMALK	[K].SDLEMQYETLQEELMALK.[K]		0.000250093	0.000386037	1	1	1	P35527	P35527 [272-289]		0	2171.02	18
High	SDLEMQYETLQEELMALK	[K].SDLEMQYETLQEELMALK.[K]	1xOxidation [M]	1.64585e-07	0.000386037	1	1	4	P35527	P35527 [272-289]		0	2187.02	18					519264
High	SDLEMQYETLQEELMALK	[K].SDLEMQYETLQEELMALK.[K]	2xOxidation [M5; M15]	1.39854e-10	0.000386037	1	1	14	P35527	P35527 [272-289]		0	2203.01	18		134589	99683	181503	2.15389e+06	748826	707821		343179	2.88838e+06	2.14934e+06	285273		164587	188200		111169	239946		411099	244848	106786	180527	59760.3		114702	168294	67272.3	77636.6	113027		74948.9	97558.7		185261
High	SDLEMQYETLQEELMALKK	[K].SDLEMQYETLQEELMALKK.[N]	2xOxidation [M5; M15]	4.45828e-05	0.000386037	1	1	1	P35527	P35527 [272-290]		1	2331.11	19				231964				186959			230444	179330			205349	197337		253502			144718							158727	189259		217452
High	SDLEVAHYK	[R].SDLEVAHYK.[L]		4.06909e-05	0.000386037	1	1	200	P07358	P07358 [297-305]		0	1061.53	9	6.85723e+06	3.5673e+06	5.80184e+06	5.26794e+06	5.65932e+06	3.70826e+06	3.79922e+06	3.67572e+06	3.90793e+06	3.37233e+06	4.90987e+06	4.69315e+06	4.2214e+06	4.07384e+06	4.26645e+06	3.78295e+06	4.19075e+06	4.83511e+06	3.98904e+06	3.47881e+06	2.71158e+06	4.16966e+06	4.02275e+06	3.60019e+06	4.24575e+06	3.66605e+06	3.49177e+06	2.66499e+06	3.5532e+06	3.83916e+06	2.92415e+06	2.08233e+06	3.77879e+06	2.9421e+06	2.49475e+06
High	SGAQATWTELPWPHEK	[K].SGAQATWTELPWPHEK.[V]		7.67028e-13	0.000386037	1	1	1151	P02790	P02790 [387-402]		0	1837.89	16	1.23318e+08	9.90094e+07	1.08112e+08	1.07887e+08	1.27953e+08	9.92017e+07	9.3732e+07	9.9022e+07	1.10545e+08	1.08007e+08	1.10356e+08	1.14417e+08	1.09733e+08	1.00416e+08	1.06804e+08	1.32628e+08	1.03588e+08	1.06347e+08	1.07635e+08	1.03604e+08	1.04685e+08	1.07291e+08	9.96914e+07	9.67139e+07	1.20002e+08	9.52701e+07	9.89462e+07	9.94831e+07	1.26095e+08	7.38845e+07	8.83547e+07	7.13114e+07	1.07362e+08	8.61107e+07	8.09822e+07
High	SDTSLEMTMGNALFLDGSLELLESFSADIK	[K].SDTSLEMTMGNALFLDGSLELLESFSADIK.[H]	2xOxidation [M7; M9]	1.41925e-05	0.000386037	1	1	1	P08185	P08185 [119-148]		0	3266.53	30
High	SDVMYTDWK	[R].SDVMYTDWK.[K]	1xOxidation [M4]	0.00271474	0.000386037	1	1	365	P19652	P19652 [171-179]		0	1160.49	9	1.75222e+07	2.28512e+07	1.86248e+07	1.80703e+07	1.01843e+07	2.38672e+07	1.44351e+07	2.20423e+07	2.28776e+07	2.20462e+07	1.16187e+07	1.73383e+07	2.39985e+07	2.06954e+07	2.62908e+07	2.89176e+07	2.40439e+07	1.44423e+07	2.74821e+07	2.024e+07	2.50617e+07	2.33154e+07	1.78055e+07	2.19063e+07	1.00513e+07	2.39973e+07	2.03348e+07	1.65471e+07	2.60018e+07	8.62497e+06	2.47737e+07	2.03372e+07	1.59863e+07	2.27149e+07	2.269e+07
High	SDVMYTDWKK	[R].SDVMYTDWKK.[D]		0.00121555	0.000386037	1	1	37	P19652	P19652 [171-180]		1	1272.59	10	382799	845459		690142	441022	1.55977e+06	724579	2.73109e+06	1.77331e+06	1.13553e+06	684209	1.38982e+06	1.28246e+06	1.25799e+06	1.75951e+06	1.07743e+06	773451	1.06023e+06	1.08318e+06	1.99322e+06	1.62544e+06	2.03119e+06	1.34902e+06	1.3571e+06	548261	638642	1.02635e+06	1.58767e+06	1.03953e+06	339614	648353	1.86518e+06	2.00588e+06	2.42877e+06	1.52732e+06
High	SDVMYTDWKK	[R].SDVMYTDWKK.[D]	1xOxidation [M4]	7.14762e-05	0.000386037	1	1	244	P19652	P19652 [171-180]		1	1288.59	10	5.03955e+06	6.56998e+06	5.29276e+06	4.20127e+06	2.68678e+06	6.55945e+06	3.91037e+06	6.71055e+06	5.78988e+06	5.72497e+06	3.42068e+06	5.9147e+06	6.66286e+06	6.10478e+06	7.74349e+06	7.6527e+06	6.34305e+06	5.05226e+06	8.62768e+06	5.83926e+06	7.16546e+06	7.11598e+06	5.83506e+06	5.51559e+06	3.64857e+06	6.98483e+06	6.34049e+06	5.3158e+06	7.28861e+06	3.08442e+06	6.5492e+06	5.23491e+06	5.57417e+06	6.44216e+06	6.3608e+06
High	SDVVYTDWK	[K].SDVVYTDWK.[K]		0.000305512	0.000386037	1	1	812	P02763	P02763 [171-179]		0	1112.53	9	4.47876e+08	3.27936e+08	2.39648e+08	2.80433e+08	4.19482e+08	2.10758e+08	2.12105e+08	2.43122e+08	2.06501e+08	2.74586e+08	2.65431e+08	3.80711e+08	2.51083e+08	2.50467e+08	1.51975e+08	2.49487e+08	2.53908e+08	2.82902e+08	1.75513e+08	1.28623e+08	1.9256e+08	2.62605e+08	1.62983e+08	2.26269e+08	2.46133e+08	2.26868e+08	1.54742e+08	2.49065e+08	2.22681e+08	1.67194e+08	2.2066e+08	2.15637e+08	2.83149e+08	2.47214e+08	2.52124e+08
High	SDVVYTDWKK	[K].SDVVYTDWKK.[D]		0.000548038	0.000386037	1	1	346	P02763	P02763 [171-180]		1	1240.62	10	8.24008e+07	4.4007e+07	4.16011e+07	5.66793e+07	8.34354e+07	4.07853e+07	4.81051e+07	4.45918e+07	4.5027e+07	6.08628e+07	5.81227e+07	7.63884e+07	5.40041e+07	4.75406e+07	3.99095e+07	5.02831e+07	5.92309e+07	8.72487e+07	5.90108e+07	5.16162e+07	5.12e+07	6.5663e+07	3.15692e+07	4.2532e+07	5.91678e+07	5.79696e+07	5.28685e+07	9.09291e+07	6.33443e+07	5.5579e+07	5.07401e+07	5.53319e+07	8.1006e+07	6.90728e+07	6.52975e+07
High	SEAYNTFSER	[R].SEAYNTFSER.[R]		0.000683158	0.000386037	1	1	129	P12259	P12259 [1053-1062]		0	1203.53	10	1.02132e+06		876864		728216	855885	541674	860486	819561					827978		725183	733107		958179		678350			1.05438e+06		622275	812766						739360
High	SEDCFILDHGK	[K].SEDCFILDHGK.[D]	1xCarbamidomethyl [C4]	0.000227164	0.000386037	1	1	407	P06396	P06396 [328-338]		0	1320.59	11	2.28025e+07	2.03177e+07	2.12316e+07	1.63107e+07	2.19334e+07	2.0859e+07	2.92595e+07	1.96058e+07	2.28813e+07	1.59532e+07	1.86029e+07	2.26611e+07	2.00704e+07	2.3882e+07	2.30829e+07	1.85025e+07	2.38506e+07	2.28413e+07	1.96318e+07	2.08026e+07	2.06417e+07	2.02634e+07	3.13964e+07	1.99722e+07	1.44854e+07	1.60085e+07	1.82739e+07	1.49124e+07	2.08707e+07	1.75738e+07	2.01593e+07	2.4331e+07	2.17014e+07	2.06955e+07	2.35487e+07
High	SEDTAVYYCAR	[R].SEDTAVYYCAR.[-]	1xCarbamidomethyl [C9]	0.000109016	0.000386037	3	3	35	P01742; A0A0C4DH29; P01743	P01742 [107-117]; A0A0C4DH29 [107-117]; P01743 [107-117]		0	1334.57	11	756586	820935	516783	521929	1.00645e+06	758857	849804	750317		445930		868670	720981	479748	316455					640783	695673	744018	638306	637857	508825	658276		393836	701037	714061	404285	528490	636064	1.10937e+06	1.24776e+06
High	SDVGFLPPFPTLDPEEK	[K].SDVGFLPPFPTLDPEEK.[C]		1.8977e-09	0.000386037	1	1	293	P43652	P43652 [131-147]		0	1887.94	17	6.91021e+06	6.17149e+06	5.75526e+06	4.57962e+06	5.76923e+06	5.13274e+06	5.28786e+06	4.67322e+06	4.82148e+06	5.8524e+06	5.55616e+06	5.00282e+06	5.20325e+06	4.81522e+06	6.59818e+06	5.06168e+06	4.6431e+06	6.73452e+06	6.59209e+06	3.46919e+06	5.10572e+06	6.5309e+06	5.99903e+06	5.48181e+06	6.59353e+06	4.54348e+06	6.31714e+06	5.10363e+06	4.53215e+06	5.54916e+06	4.76039e+06	5.46005e+06	5.58046e+06	5.15034e+06	4.94571e+06
High	SCAVAEYGVYVK	[K].SCAVAEYGVYVK.[V]	1xCarbamidomethyl [C2]	8.09284e-07	0.000386037	2	2	216	P00739; P00738	P00739 [322-333]; P00738 [380-391]		0	1345.65	12	1.01433e+07	5.03941e+06	6.86295e+06	5.20665e+06	5.11688e+06	4.37848e+06	1.10953e+06	4.62398e+06	2.78608e+06	3.04759e+06	1.67948e+06	6.17543e+06	5.41294e+06	6.15953e+06	3.04306e+06	4.32321e+06	4.8043e+06	3.70339e+06	3.05133e+06	3.22738e+06	2.55441e+06	5.16224e+06	4.6855e+06	5.3709e+06	2.77835e+06	7.53768e+06	3.37047e+06	4.2703e+06	4.28978e+06	3.07219e+06	3.754e+06	946983	4.70737e+06	5.12057e+06	3.64602e+06
High	SGFPQVSMFFTHTFPK	[K].SGFPQVSMFFTHTFPK.[-]		5.23527e-07	0.000386037	1	1	85	P04196	P04196 [510-525]		0	1857.9	16	1.57183e+06	1.87601e+06	1.00493e+06	1.55586e+06	1.75369e+06	1.76373e+06	2.15813e+06	1.68578e+06	1.7329e+06	1.20576e+06	2.08801e+06	1.27916e+06	1.82705e+06	1.39555e+06	1.73331e+06	1.55573e+06	1.80718e+06	1.53246e+06	3.15171e+06	1.48479e+06	1.66061e+06	2.34478e+06	1.65121e+06	1.68645e+06	1.57795e+06	2.80151e+06	1.28329e+06	2.18641e+06	1.38831e+06	2.28949e+06	1.94614e+06	3.02632e+06	3.31325e+06	1.34434e+06	1.58301e+06
High	SGFSFGFK	[K].SGFSFGFK.[I]		0.00767969	0.000386037	1	1	17	P07358	P07358 [252-259]		0	876.425	8	4.18299e+06	2.66786e+06	2.81228e+06	3.60128e+06	4.00347e+06	2.78488e+06	2.85733e+06	2.48936e+06	3.16268e+06	2.54406e+06	3.32651e+06	3.44835e+06	2.67173e+06	2.85134e+06	2.54428e+06	3.46155e+06	3.36172e+06	2.87244e+06	3.66194e+06	2.51804e+06	2.31723e+06	3.35042e+06	2.69982e+06	3.58046e+06	3.4745e+06	2.99259e+06	2.52775e+06	2.43772e+06	2.67461e+06	3.55815e+06	2.29682e+06	2.42267e+06	3.33948e+06	2.91894e+06	3.14378e+06
High	SKEQLTPLIK	[K].SKEQLTPLIK.[K]		0.00562117	0.000386037	1	1	125	P02652	P02652 [68-77]		1	1156.69	10	755381	695526	733287	743219	854333	860110	887090	1.44557e+06	657811	992462	782366	603241	1.15564e+06	705705	714628	610391	665200	1.40016e+06	1.46047e+06	760188	856799	667008	1.36709e+06	994276	799283	1.0892e+06	862812	1.57481e+06	1.76228e+06	1.69624e+06	2.41186e+06	1.58496e+06	1.53077e+06	1.67415e+06	2.05034e+06
High	SKLPGIVAEGRDDLYVSDAFHK	[K].SKLPGIVAEGRDDLYVSDAFHK.[A]		2.08731e-10	0.000386037	1	1	175	P01008	P01008 [381-402]		2	2417.25	22	2.07549e+06	4.34196e+06	2.34011e+06	3.20571e+06	4.69526e+06	3.28319e+06	6.30131e+06	3.91984e+06	4.13308e+06	4.76228e+06	5.41127e+06	4.5531e+06	3.80101e+06	4.01508e+06	3.66214e+06	5.77615e+06	4.51408e+06	4.71838e+06	7.83915e+06	5.78394e+06	6.99763e+06	3.64247e+06	4.75604e+06	4.65187e+06	3.89406e+06	9.23876e+06	4.76234e+06	6.73846e+06	5.54064e+06	5.31569e+06	4.59516e+06	6.50468e+06	8.61455e+06	5.9996e+06	4.2282e+06
High	SKPTVSSSMEFK	[K].SKPTVSSSMEFK.[Y]	1xOxidation [M9]	0.00706681	0.000386037	1	1	148	P04114	P04114 [3450-3461]		0	1343.65	12	2.05388e+06	4.08184e+06	3.08599e+06	2.98623e+06	3.73293e+06	4.53822e+06	2.45292e+06	4.97648e+06	5.4632e+06	4.53638e+06	2.67632e+06	1.74386e+06	4.32061e+06	2.24451e+06	3.87552e+06	2.28237e+06	3.16185e+06	2.06818e+06	6.52849e+06	4.30064e+06	3.69107e+06	2.90123e+06	2.281e+06	1.34355e+06	1.78578e+06	5.37745e+06	4.06797e+06	3.40144e+06	4.36211e+06	1.7e+06	3.78753e+06	5.26754e+06	2.64253e+06	3.99158e+06	2.11594e+06
High	SLAELGGHLDQQVEEFR	[K].SLAELGGHLDQQVEEFR.[R]		7.48536e-15	0.000386037	1	1	529	P06727	P06727 [288-304]		0	1927.95	17	1.11069e+07	1.65668e+07	1.22153e+07	8.38154e+06	1.98494e+07	1.21607e+07	1.26584e+07	1.14832e+07	1.08189e+07	1.67185e+07	8.96931e+06	1.42099e+07	1.3533e+07	1.40353e+07	1.41068e+07	1.92323e+07	9.17307e+06	1.0703e+07	1.41645e+07	1.21512e+07	1.21788e+07	9.31653e+06	1.27639e+07	1.33186e+07	2.51319e+07	8.5596e+06	1.14045e+07	1.16922e+07	1.46884e+07	8.42174e+06	7.02949e+06	1.61227e+07	1.26417e+07	1.9081e+07	1.28114e+07
High	SLAELGGHLDQQVEEFRR	[K].SLAELGGHLDQQVEEFRR.[R]		1.04079e-11	0.000386037	1	1	460	P06727	P06727 [288-305]		1	2084.05	18	2.37055e+07	2.51051e+07	1.47316e+07	1.56682e+07	4.16893e+07	2.34646e+07	2.91215e+07	2.95307e+07	2.40036e+07	4.111e+07	1.87273e+07	2.58256e+07	2.70512e+07	2.51063e+07	2.30404e+07	2.37298e+07	1.95598e+07	1.96714e+07	2.96021e+07	3.07082e+07	3.09613e+07	1.80273e+07	2.51731e+07	2.69325e+07	4.1755e+07	2.24813e+07	1.77511e+07	3.00442e+07	2.64664e+07	1.68197e+07	1.50945e+07	3.24727e+07	3.03605e+07	3.11547e+07	2.85984e+07
High	SLAPYAQDTQEK	[R].SLAPYAQDTQEK.[L]		3.85175e-05	0.000386037	1	1	131	P06727	P06727 [222-233]		0	1350.65	12	4.07004e+07	4.81133e+07	3.83328e+07	2.81787e+07	4.94443e+07	3.56522e+07	3.57561e+07	4.26948e+07	3.65139e+07	3.61145e+07	2.40015e+07	4.78047e+07	2.94477e+07	3.81013e+07	4.12784e+07	3.97835e+07	2.9715e+07	3.77396e+07	3.50741e+07	3.55323e+07	2.72502e+07	2.67198e+07	3.40001e+07	3.0103e+07	5.13729e+07	1.94817e+07	2.44883e+07	2.92352e+07	3.52859e+07	1.77853e+07	2.32117e+07	3.78514e+07	3.43273e+07	2.71387e+07	3.08294e+07
High	SIAQYWLGCPAPGHL	[R].SIAQYWLGCPAPGHL.[-]	1xCarbamidomethyl [C9]	5.17692e-10	0.000386037	1	1	153	P04004	P04004 [464-478]		0	1669.82	15	4.22143e+06	4.32121e+06	952730	4.33107e+06	2.40047e+06	1.10426e+06	4.07326e+06	2.41378e+06	3.46992e+06	5.32299e+06	1.54422e+06	625608	2.1892e+06	815444	378045	453054	3.85923e+06	3.95626e+06	2.48031e+06	5.02842e+06	2.74888e+06	2.12388e+06	1.69101e+06	5.19215e+06	2.82322e+06	4.29493e+06	1.33261e+06	3.40296e+06	3.85717e+06	2.78656e+06	4.73216e+06	1.3273e+06		1.21349e+06	3.61067e+06
High	SIAYLQMNSLK	[K].SIAYLQMNSLK.[T]		0.000215532	0.000386037	1	1	24	A0A0A0MS15	A0A0A0MS15 [98-108]		0	1267.67	11	564176	696012	346760	294142	1.04172e+06	607559	539495	1.25401e+06	675461	1.05516e+06	421393	1.17387e+06					385773			1.15712e+06	768873		319632		474285	620309	604060	418873	626965		1.06926e+06	823597	641116	1.40798e+06	1.22884e+06
High	SIAYLQMNSLK	[K].SIAYLQMNSLK.[T]	1xOxidation [M7]	0.00422167	0.000386037	1	1	2	A0A0A0MS15	A0A0A0MS15 [98-108]		0	1283.67	11	2.52776e+06	4.53529e+06	4.28508e+06	1.97905e+06	3.54482e+06	2.58023e+06	1.63953e+06	4.14705e+06	2.39364e+06	3.62237e+06	2.74179e+06	3.90359e+06	1.15185e+06	1.0762e+06	1.12724e+06	1.10145e+06	2.02417e+06	981561	1.45465e+06	2.44402e+06	3.25398e+06	925332	1.55313e+06	898399	2.2784e+06	2.81168e+06	2.71839e+06	1.66584e+06	4.85207e+06	1.92713e+06	6.25429e+06	2.85306e+06	2.57522e+06	3.48832e+06	4.80284e+06
High	SLDEHYHIR	[K].SLDEHYHIR.[V]		5.91073e-05	0.000386037	1	1	787	P04114	P04114 [2211-2219]		0	1169.57	9	3.05198e+07	4.11239e+07	4.09558e+07	3.30558e+07	3.46646e+07	4.69865e+07	2.90783e+07	5.45338e+07	4.37047e+07	3.24853e+07	2.64785e+07	3.16718e+07	5.14562e+07	3.13404e+07	6.0052e+07	3.87371e+07	3.30264e+07	2.97664e+07	4.00546e+07	3.88248e+07	3.37128e+07	3.57641e+07	3.55284e+07	2.66643e+07	3.06143e+07	3.13574e+07	4.28732e+07	3.32584e+07	3.71417e+07	2.40994e+07	3.35966e+07	3.59337e+07	2.13551e+07	4.59045e+07	2.99558e+07
High	SLDFNTLVDNISVDPETGDLWVGCHPNGMK	[K].SLDFNTLVDNISVDPETGDLWVGCHPNGMK.[I]	1xCarbamidomethyl [C24]; 1xOxidation [M29]	3.98679e-17	0.000386037	1	1	116	P27169	P27169 [261-290]		0	3346.54	30	1.07633e+06	1.46285e+06	600058	2.41785e+06		1.30252e+06	1.79496e+06	1.5683e+06	1.49947e+06	2.33947e+06		873787		1.32518e+06	1.52446e+06		2.40868e+06	1.67831e+06		2.84034e+06			425522	1.85678e+06		3.09958e+06			2.44419e+06		1.58454e+06				2.04646e+06
High	SLDFTELDVAAEK	[R].SLDFTELDVAAEK.[I]		3.06995e-08	0.000386037	1	1	374	P01019	P01019 [238-250]		0	1437.71	13	2.40953e+07	2.03019e+07	5.77806e+07	1.85526e+07	1.48373e+07	1.62174e+07	1.82311e+07	1.89574e+07	2.20865e+07	2.18645e+07	1.67606e+07	2.21053e+07	2.23764e+07	2.16068e+07	2.23828e+07	2.11604e+07	1.84593e+07	1.64302e+07	1.93689e+07	4.18776e+07	1.89722e+07	2.24185e+07	2.36386e+07	2.16362e+07	5.88109e+07	2.23606e+07	1.78127e+07	1.84032e+07	4.42865e+07	5.28535e+07	2.10814e+07	1.65409e+07	2.02619e+07	1.94174e+07	1.70506e+07
High	SLDLDSIIAEVK	[R].SLDLDSIIAEVK.[A]		1.46136e-08	0.000386037	1	1	134	P04264	P04264 [344-355]		0	1302.72	12	4.37845e+06	5.1078e+06	7.53356e+06	5.26388e+06	2.3469e+07	1.56409e+07	6.04906e+06	1.59395e+06	4.63192e+06	2.08358e+07	1.64986e+07	5.82581e+06	2.21813e+06	6.2889e+06	5.38221e+06	2.44195e+06	3.20543e+06	4.74427e+06	4.99297e+06	5.21668e+06	5.71078e+06	5.96849e+06	4.28619e+06	3.68e+06	1.36111e+06	3.06045e+06	3.32844e+06	1.8845e+06	2.81293e+06	2.24352e+06	4.37728e+06	1.19384e+06	4.39272e+06	1.20495e+06	3.59801e+06
High	SLEDLQLTHNK	[K].SLEDLQLTHNK.[I]		1.80795e-05	0.000386037	1	1	252	P51884	P51884 [138-148]		0	1297.67	11	1.70097e+07	1.61857e+07	8.64927e+06	1.21027e+07	1.43028e+07	1.32579e+07	1.58419e+07	1.12501e+07	1.3758e+07	1.13734e+07	1.29321e+07	1.37142e+07	1.41583e+07	1.31711e+07	1.11376e+07	1.40508e+07	1.6275e+07	1.71314e+07	1.4669e+07	9.4787e+06	1.24209e+07	1.45016e+07	1.55884e+07	1.44551e+07	1.10655e+07	1.0796e+07	1.14296e+07	9.94303e+06	1.14774e+07	1.15526e+07	1.47372e+07	1.25468e+07	1.16241e+07	1.83254e+07	1.52449e+07
High	SIEVFGQFNGK	[R].SIEVFGQFNGK.[R]		0.00189079	0.000386037	1	1	7	P02748	P02748 [66-76]		0	1225.62	11	5.9832e+06								3.16628e+06	3.02073e+06						4.20114e+06					3.35421e+06	4.46918e+06			5.22332e+06		3.34559e+06							2.83845e+06	4.46479e+06
High	SLEYLDLSFNQIAR	[K].SLEYLDLSFNQIAR.[L]		2.45235e-12	0.000386037	1	1	257	P51884	P51884 [185-198]		0	1668.86	14	4.32294e+06	4.4822e+06	2.10757e+06	4.31289e+06	6.72306e+06	4.73556e+06	5.07557e+06	3.49523e+06	4.02405e+06	4.45157e+06	4.34499e+06	3.05951e+06	4.97054e+06	3.91998e+06	3.22808e+06	4.77187e+06	5.68252e+06	5.33796e+06	4.63097e+06	2.45532e+06	4.04134e+06	4.49404e+06	5.39663e+06	4.24868e+06	4.06817e+06	5.12024e+06	5.68775e+06	3.55878e+06	2.45629e+06	4.65183e+06	3.35353e+06	3.50046e+06	2.88431e+06	6.05508e+06	5.81578e+06
High	SLFTDLEAENDVLHCVAFAVPK	[R].SLFTDLEAENDVLHCVAFAVPK.[S]	1xCarbamidomethyl [C15]	3.00332e-13	0.000386037	1	1	59	P01023	P01023 [72-93]		0	2475.22	22	1.19603e+06	1.37697e+06	986566	1.18439e+06	1.16648e+06	615868	1.09421e+06	640626	1.19349e+06	784461	1.32498e+06	705522	1.03379e+06	867403	1.13402e+06	1.01201e+06	1.06235e+06	1.25549e+06	892992	1.1292e+06	870225	669736	1.75133e+06	1.11261e+06	1.27551e+06	930695	1.16736e+06	808822	1.14667e+06	1.24305e+06	1.23652e+06	773065	892673	1.33379e+06	1.54548e+06
High	SKAEAESLYQSK	[K].SKAEAESLYQSK.[Y]		0.000466013	0.000386037	1	1	4	P04264	P04264 [365-376]		1	1340.67	12					262913	114839				245956	166696																			90334.4
High	SHLIIAQVAK	[K].SHLIIAQVAK.[N]		3.00637e-05	0.000386037	1	1	256	P43251	P43251 [330-339]		0	1079.66	10	1.52277e+06	1.73183e+06	2.19971e+06	1.13723e+06	2.30278e+06	1.65226e+06	1.54963e+06	1.8461e+06	1.83142e+06	1.4452e+06	1.6264e+06	1.46649e+06	1.38868e+06	1.67813e+06	1.61022e+06	1.48286e+06	1.93409e+06	1.69935e+06	1.68182e+06	1.76341e+06	1.61407e+06	1.61852e+06	1.63794e+06	1.4748e+06	680639	1.45189e+06	1.39561e+06	1.50522e+06	1.3652e+06	1.20848e+06	1.48807e+06	528650	1.80528e+06	1.47009e+06	1.75835e+06
High	SHCIAEVENDEMPADLPSLAADFVESK	[K].SHCIAEVENDEMPADLPSLAADFVESK.[D]	1xCarbamidomethyl [C3]; 1xOxidation [M12]	6.02378e-28	0.000386037	1	1	1575	P02768	P02768 [311-337]		0	2990.34	27	1.69311e+08	1.91909e+08	1.65565e+08	1.37631e+08	2.03586e+08	1.66668e+08	2.21434e+08	1.30409e+08	1.34006e+08	1.79041e+08	1.52564e+08	1.23856e+08	1.54882e+08	1.58639e+08	1.88927e+08	1.40833e+08	2.30371e+08	2.01431e+08	1.50829e+08	1.62413e+08	1.77923e+08	9.78013e+07	1.52137e+08	1.81143e+08	1.66861e+08	1.91055e+08	1.66453e+08	1.46981e+08	1.83554e+08	2.21648e+08	2.16893e+08	1.73898e+08	1.49961e+08	1.97611e+08	2.00234e+08
High	SHCIAEVENDEMPADLPSLAADFVESK	[K].SHCIAEVENDEMPADLPSLAADFVESK.[D]	1xCarbamidomethyl [C3]	2.52552e-28	0.000386037	1	1	900	P02768	P02768 [311-337]		0	2974.34	27	5.8834e+07	4.6925e+07	2.97522e+07	3.65627e+07	5.27116e+07	4.13873e+07	7.06662e+07	5.28517e+07	4.53242e+07	5.87706e+07	4.71009e+07	4.43303e+07	6.69888e+07	6.48366e+07	5.89198e+07	3.36909e+07	4.4335e+07	6.44163e+07	3.04594e+07	6.0867e+07	7.63925e+07	3.87141e+07	6.20435e+07	6.04805e+07	3.57866e+07	4.05437e+07	5.18952e+07	6.5712e+07	3.3009e+07	5.73065e+07	5.65173e+07	6.89349e+07	6.27553e+07	7.28223e+07	6.99035e+07
High	SGGGGGGGLGSGGSIR	[R].SGGGGGGGLGSGGSIR.[S]		2.37568e-09	0.000386037	1	1	6	P35527	P35527 [14-29]		0	1232.6	16		355589	348790	208846	1.23706e+06	532046	759745		471519	2.66641e+06	1.43938e+06			258894	344277	177374		295365	319161	511299		123083	91029.9	101937			160167	121899				155062	161106	69790.9	380147
High	SGGRTEHPFTVEEFVLPK	[K].SGGRTEHPFTVEEFVLPK.[F]		3.31933e-06	0.000386037	1	1	5	P01023	P01023 [211-228]		1	2030.03	18		311915		346636	325586						392191			174128						408347				289963		344870	309844		290173		502488			196539
High	SGIPIVTSPYQIHFTK	[R].SGIPIVTSPYQIHFTK.[T]		2.4226e-13	0.000386037	1	1	721	P01024	P01024 [344-359]		0	1787.97	16	1.46422e+08	1.97985e+08	1.37015e+08	1.71801e+08	1.76306e+08	1.82931e+08	2.04135e+08	1.94382e+08	1.84173e+08	1.9895e+08	1.69691e+08	1.7392e+08	1.55191e+08	1.78585e+08	1.73773e+08	1.62582e+08	1.52786e+08	1.52023e+08	2.42905e+08	1.54339e+08	2.04554e+08	1.73699e+08	1.01819e+08	1.83384e+08	1.92053e+08	1.82105e+08	2.02789e+08	1.62618e+08	1.61799e+08	1.29216e+08	1.42601e+08	1.5472e+08	2.05526e+08	1.35691e+08	1.49172e+08
High	SGLSTGWTQLSK	[R].SGLSTGWTQLSK.[L]		6.29331e-07	0.000386037	1	1	353	P04217	P04217 [95-106]		0	1264.65	12	1.85547e+07	2.31989e+07	2.13701e+07	2.0829e+07	1.20284e+07	1.16164e+07	1.65683e+07	1.30074e+07	1.65157e+07	1.3872e+07	2.04826e+07	1.85603e+07	1.37494e+07	1.79584e+07	1.28093e+07	2.3708e+07	2.10553e+07	2.02082e+07	1.69768e+07	1.47703e+07	1.5369e+07	1.4856e+07	2.18854e+07	1.89341e+07	2.17926e+07	2.26682e+07	1.3445e+07	1.74894e+07	1.81212e+07	2.4683e+07	2.30996e+07	2.28763e+07	2.49637e+07	1.22917e+07	1.75891e+07
High	SGNTFRPEVHLLPPPSEELALNELVTLTCLAR	[K].SGNTFRPEVHLLPPPSEELALNELVTLTCLAR.[G]	1xCarbamidomethyl [C29]	1.4903e-20	0.000386037	2	2	213	P01876; P01877	P01876 [222-253]; P01877 [209-240]		0	3573.87	32	1.64429e+06	4.31625e+06	955472	1.48197e+06	2.93448e+06	2.7092e+06	2.34693e+06	4.31607e+06	1.44943e+06	7.58436e+06	2.82925e+06	1.12916e+06	1.75407e+06	1.1827e+06	3.37392e+06	1.70755e+06	695437	1.69466e+06	3.57293e+06	3.17114e+06	3.06249e+06	2.37172e+06	1.33873e+06	3.09155e+06	1.71027e+06	5.0672e+06	3.43793e+06	3.22796e+06	968610	1.21149e+06	4.64058e+06	5.00897e+06	2.57865e+06	3.79556e+06	3.31179e+06
High	SGQAPVLVIYEDSK	[K].SGQAPVLVIYEDSK.[R]		5.24048e-09	0.000386037	1	1	38	A0A075B6K4	A0A075B6K4 [58-71]		0	1505.78	14	3.00484e+06	3.48951e+06	2.11443e+06	2.46955e+06	740865	4.77102e+06	825472	811531	5.39007e+06	6.96246e+06	2.23173e+06	3.70692e+06	4.28072e+06	2.87941e+06	1.52305e+06	4.6604e+06	1.58593e+06	2.66849e+06	2.58343e+06	2.25261e+06		2.78072e+06	1.22121e+06	1.53552e+06	2.08562e+06	4.35096e+06	3.46999e+06	2.04891e+06	2.44494e+06		686313	2.89258e+06	1.8042e+06	5.49917e+06	1.82738e+06
High	SGQSEDRQPVPGQQMTLK	[K].SGQSEDRQPVPGQQMTLK.[I]		1.93513e-09	0.000386037	1	1	202	P01024	P01024 [567-584]		1	1985.97	18	5.6854e+06	7.13753e+06	4.29182e+06	4.77944e+06	6.78464e+06	7.0511e+06	8.67406e+06	9.98405e+06	8.2135e+06	7.31789e+06	6.02847e+06	1.0197e+07	5.42643e+06	7.73509e+06	5.8331e+06	4.91595e+06	4.68873e+06	7.41153e+06	6.17664e+06	8.08263e+06	8.18598e+06	8.78716e+06	3.91985e+06	5.53859e+06	7.16297e+06	6.89504e+06	6.697e+06	9.57852e+06	4.33865e+06	7.07422e+06	4.83617e+06	8.07953e+06	9.80192e+06	9.01774e+06	6.02588e+06
High	SGQSEDRQPVPGQQMTLK	[K].SGQSEDRQPVPGQQMTLK.[I]	1xOxidation [M15]	2.73043e-08	0.000386037	1	1	433	P01024	P01024 [567-584]		1	2001.97	18	3.56137e+07	3.02096e+07	3.67645e+07	2.78032e+07	3.02865e+07	2.73266e+07	3.23262e+07	2.43893e+07	3.08508e+07	2.8045e+07	2.66906e+07	2.82104e+07	2.3515e+07	2.33123e+07	2.63935e+07	2.77834e+07	3.20072e+07	2.64501e+07	4.00744e+07	2.67319e+07	3.65286e+07	2.54121e+07	1.28689e+07	1.72156e+07	2.78494e+07	3.84586e+07	3.50795e+07	3.19079e+07	3.19687e+07	2.8753e+07	2.83941e+07	2.80252e+07	3.72766e+07	2.66378e+07	1.82729e+07
High	SGFPQVSMFFTHTFPK	[K].SGFPQVSMFFTHTFPK.[-]	1xOxidation [M8]	7.4185e-07	0.000386037	1	1	52	P04196	P04196 [510-525]		0	1873.89	16
High	SGSDEVQVGQQR	[K].SGSDEVQVGQQR.[T]		6.17197e-10	0.000386037	1	1	1057	P01024	P01024 [1571-1582]		0	1289.61	12	1.65112e+08	1.49247e+08	1.4353e+08	1.15859e+08	1.25247e+08	1.02884e+08	1.12343e+08	1.08564e+08	1.22094e+08	9.01139e+07	1.20368e+08	1.30756e+08	1.09139e+08	1.34528e+08	1.24041e+08	1.18922e+08	1.43339e+08	1.2153e+08	1.31155e+08	8.74546e+07	1.14362e+08	1.10019e+08	7.13732e+07	9.14659e+07	1.2082e+08	1.0915e+08	1.30444e+08	1.11661e+08	9.07284e+07	8.34301e+07	1.07065e+08	9.64962e+07	1.18244e+08	7.86914e+07	9.35028e+07
High	SGTASVVCLLNNFYPR	[K].SGTASVVCLLNNFYPR.[E]	1xCarbamidomethyl [C8]	1.44716e-08	0.000386037	1	1	85	P01834	P01834 [19-34]		0	1797.9	16	238505	726943	82442.1	438555	604303	589153	674181	700952	515958	913349	583926	241150	293360	697532	541690	792440	303348	534370	450745	474273	1.06042e+06	458657	455509	339717	425918	856763	839578	464139	596522	618629	748323	2.15864e+06	1.03298e+06	385167	764865
High	SGTHTLPVESGDMK	[R].SGTHTLPVESGDMK.[G]		0.00200101	0.000386037	1	1	19	P20742	P20742 [504-517]		0	1458.69	14			1.59964e+06																	3.74496e+06		475457			777307				1.2492e+06	505094				175642
High	SGTHTLPVESGDMK	[R].SGTHTLPVESGDMK.[G]	1xOxidation [M13]	7.75201e-05	0.000386037	1	1	103	P20742	P20742 [504-517]		0	1474.68	14	1.88491e+06	183324	1.13777e+07	1.40515e+06		61547.3				748028	995005	1.94907e+06	322406	57184.8	265206	974848	3.7126e+06	933970	422310	1.28431e+07	294165	2.40486e+06	204813	1.18006e+06	6.09898e+06	3.54837e+06	362131		1.60765e+07	4.23092e+06			211277	384727	1.91662e+06
High	SGTSASLAISGLR	[K].SGTSASLAISGLR.[S]		3.87534e-07	0.000386037	1	1	187	P01700	P01700 [87-99]		0	1219.66	13	8.04225e+06	4.23376e+06	7.72091e+06	7.12566e+06	6.10632e+06	7.04321e+06	9.87082e+06	5.89396e+06	6.63044e+06	8.43539e+06	1.16072e+07	7.42527e+06	6.10358e+06	6.31667e+06	6.2861e+06	7.86748e+06	7.15062e+06	6.00613e+06	6.15572e+06	8.55719e+06	7.33807e+06	7.47758e+06	6.15841e+06	4.31879e+06	6.21687e+06	6.49194e+06	5.81792e+06	5.91111e+06	8.13027e+06	4.67252e+06	8.03598e+06	1.79999e+07	1.47924e+07	6.15874e+06	1.60931e+07
High	SGVQMNTNFFHESGLEAHVALK	[R].SGVQMNTNFFHESGLEAHVALK.[A]		7.34037e-11	0.000386037	1	1	133	P04114	P04114 [897-918]		0	2416.17	22	2.20409e+06	4.65945e+06	2.81828e+06	5.62315e+06	4.31023e+06	4.80999e+06	4.05505e+06	7.40824e+06	4.29865e+06	5.68794e+06	3.58182e+06	2.42045e+06	7.10081e+06	6.48012e+06	8.2666e+06	5.00805e+06	3.60487e+06	3.38684e+06	3.91409e+06	5.30908e+06	6.01088e+06	5.87616e+06	4.51536e+06	5.13362e+06	3.56106e+06	3.84301e+06	4.66225e+06	6.98537e+06	3.07891e+06	2.6288e+06	3.17306e+06	5.72561e+06	3.14974e+06	6.29082e+06	5.30707e+06
High	SGVQMNTNFFHESGLEAHVALK	[R].SGVQMNTNFFHESGLEAHVALK.[A]	1xOxidation [M5]	1.22579e-12	0.000386037	1	1	297	P04114	P04114 [897-918]		0	2432.17	22	9.79033e+06	1.7981e+07	1.91068e+07	1.6826e+07	1.57816e+07	1.96531e+07	1.32595e+07	2.10593e+07	1.27563e+07	1.75365e+07	1.37608e+07	1.19458e+07	2.66342e+07	2.2999e+07	2.7482e+07	2.20739e+07	1.98167e+07	1.28557e+07	2.18867e+07	1.62872e+07	1.87697e+07	2.04167e+07	1.62468e+07	1.16515e+07	1.41023e+07	1.80381e+07	1.85558e+07	2.28747e+07	1.61736e+07	1.15495e+07	1.54943e+07	1.77681e+07	1.19955e+07	2.09071e+07	1.84993e+07
High	SGVQQLIQYYQDQK	[R].SGVQQLIQYYQDQK.[D]		6.12688e-09	0.000386037	1	1	182	Q13790	Q13790 [251-264]		0	1697.85	14	4.84763e+06	1.13848e+06	5.98457e+06	1.40187e+06	1.37042e+06	1.43792e+06	1.57418e+06	1.43597e+06	1.19798e+06	4.71342e+06	1.17506e+06	4.6347e+06	1.72811e+06	4.91282e+06	1.25189e+06	1.71844e+06	915616	862489	2.04635e+06	6.35359e+06	659602	589100	1.47774e+06	1.40982e+06	912772	2.30853e+06	1.38312e+06	493182	1.36513e+06	1.42467e+06	1.07196e+06	2.83826e+06	2.49543e+06	341325	1.24093e+06
High	SHALQLNNR	[K].SHALQLNNR.[Q]		0.00196891	0.000386037	2	2	286	P0C0L4; P0C0L5	P0C0L4 [1341-1349]; P0C0L5 [1341-1349]		0	1052.56	9	3.08345e+06	2.44283e+06	2.02644e+06	3.49871e+06	2.34449e+06	2.35793e+06	2.52838e+06	3.93786e+06	3.3763e+06	2.72978e+06	2.74178e+06	1.98631e+06	1.64884e+06	1.17238e+06	1.46973e+06	1.28036e+06	3.19762e+06	2.93922e+06	3.77966e+06	2.5397e+06	3.57886e+06	1.4465e+06	170878	1.15294e+06	2.33124e+06	2.81468e+06	1.92801e+06	2.12748e+06	1.39584e+06	861598	1.67069e+06	3.80692e+06	4.09688e+06	1.2381e+06	813321
High	SGSSTASWIQNVDTK	[K].SGSSTASWIQNVDTK.[Y]		2.5625e-10	0.000386037	1	1	392	P04114	P04114 [2241-2255]		0	1580.76	15	1.70659e+07	2.67458e+07	2.14373e+07	2.82444e+07	2.4473e+07	3.23964e+07	2.085e+07	3.69999e+07	2.97493e+07	2.40926e+07	2.03213e+07	2.50624e+07	4.12492e+07	2.90243e+07	2.91122e+07	3.61216e+07	2.53906e+07	2.46671e+07	3.24723e+07	2.66215e+07	3.11662e+07	3.91876e+07	2.55924e+07	2.48278e+07	2.14069e+07	2.78634e+07	2.61398e+07	3.10025e+07	3.00221e+07	1.8967e+07	2.61765e+07	3.2936e+07	1.99239e+07	3.97906e+07	2.22157e+07
High	SAVTALWGK	[K].SAVTALWGK.[V]		0.00579634	0.000386037	1	1	219	P68871	P68871 [10-18]		0	932.52	9	8.37574e+06	8.00232e+06	2.97737e+06	5.2226e+06	8.23672e+06	8.91952e+06	6.63962e+06	4.40653e+06	8.27513e+06	4.29561e+06	7.15549e+06	4.57575e+06	1.28955e+07	8.0831e+06	8.63629e+06	1.02305e+07	7.58189e+06	1.07083e+07	7.85147e+06	1.06634e+08	1.10919e+07	6.89585e+06	1.01927e+07	7.51287e+06	6.77225e+06	6.59286e+06	2.12888e+07	9.3341e+06	1.42954e+08	1.08207e+07	8.63489e+06	1.06807e+07	4.03291e+06	1.9755e+07	6.25623e+06
High	SAVQGPPER	[K].SAVQGPPER.[D]		0.00203362	0.000386037	2	2	824	P01876; P01877	P01876 [169-177]; P01877 [156-164]		0	940.485	9	3.13743e+08	3.6328e+08	7.77094e+07	7.41405e+07	2.13243e+08	1.90005e+08	7.41159e+07	1.90831e+08	1.47393e+08	2.02902e+08	8.8106e+07	1.43112e+08	9.93635e+07	6.72321e+07	3.3125e+08	1.63639e+08	4.46044e+07	9.57282e+07	1.14957e+08	1.51945e+08	1.43036e+08	1.08342e+08	1.63977e+08	2.02985e+08	6.77098e+07	1.19096e+08	1.49283e+08	5.52972e+07	1.71678e+08	4.90551e+07	2.80587e+08	1.95339e+08	1.35631e+08	1.72337e+08	8.67022e+07
High	SASNMAIVDVK	[R].SASNMAIVDVK.[M]	1xOxidation [M5]	1.21083e-05	0.000386037	1	1	1471	P01023	P01023 [1374-1384]		0	1150.58	11	1.63791e+08	1.39033e+08	1.26798e+08	1.1518e+08	1.12775e+08	8.50522e+07	1.04515e+08	7.55455e+07	1.38906e+08	7.35249e+07	1.20663e+08	8.70196e+07	7.25789e+07	6.59742e+07	7.13399e+07	9.11439e+07	9.29883e+07	1.04993e+08	7.41831e+07	1.1243e+08	5.97604e+07	7.83062e+07	1.09277e+08	9.63275e+07	1.30105e+08	7.88696e+07	8.62909e+07	6.81107e+07	1.33549e+08	7.85503e+07	1.38587e+08	7.15912e+07	5.83539e+07	9.40235e+07	7.64819e+07
High	QQNAQGGFSSTQDTVVALHALSK	[K].QQNAQGGFSSTQDTVVALHALSK.[Y]		7.00809e-22	0.000386037	1	1	930	P01023	P01023 [1241-1263]		0	2387.19	23	1.8634e+08	2.01579e+08	1.2173e+08	1.62457e+08	1.76917e+08	1.04759e+08	1.93081e+08	1.2392e+08	1.82279e+08	1.14092e+08	2.15682e+08	1.03436e+08	1.1738e+08	9.34681e+07	9.31824e+07	1.16308e+08	1.49217e+08	1.64098e+08	1.20004e+08	1.82977e+08	1.11922e+08	9.48797e+07	1.71295e+08	1.52712e+08	1.25205e+08	1.0588e+08	1.10865e+08	1.23185e+08	1.46439e+08	1.17889e+08	1.61258e+08	1.19641e+08	1.04349e+08	1.46183e+08	1.13145e+08
High	QQNAQGGFSSTQDTVVALHALSR	[K].QQNAQGGFSSTQDTVVALHALSR.[Y]		2.1131e-21	0.000386037	1	1	48	P20742	P20742 [1247-1269]		0	2415.2	23	1.07152e+06		5.68449e+06	790291						282233	660212	865925				531031	1.73483e+06			8.172e+06	404408	1.08747e+06		534149	2.4014e+06	2.67694e+06			5.20074e+06	1.90803e+06					1.00348e+06
High	QQTEWQSGQR	[R].QQTEWQSGQR.[W]		0.000781704	0.000386037	1	1	213	P02649	P02649 [34-43]		0	1247.58	10	5.72944e+06	4.81338e+06	3.40874e+06	5.82138e+06	3.5006e+06	3.47247e+06	4.00073e+06	5.0295e+06	6.10571e+06	3.58448e+06	3.05066e+06	4.10262e+06	3.8501e+06	2.64798e+06	4.68296e+06	3.81087e+06	3.93379e+06	2.66663e+06	5.60808e+06	2.82341e+06	1.18204e+07	3.37296e+06	2.86974e+06	5.60952e+06	3.26187e+06	4.39293e+06	3.08923e+06	2.67745e+06	3.11891e+06	2.0648e+06	4.58441e+06	2.66468e+06	1.7653e+06	3.73886e+06	2.7149e+06
High	QQTHMLDVMQDHFSR	[R].QQTHMLDVMQDHFSR.[A]		4.21691e-10	0.000386037	1	1	182	P10909	P10909 [168-182]		0	1872.85	15	1.49006e+06	1.43876e+06	1.03022e+06	1.63945e+06	2.28421e+06	1.99699e+06	2.1396e+06	3.16288e+06	2.39158e+06	2.36291e+06	1.92827e+06	2.52784e+06	2.46425e+06	2.32266e+06	1.76494e+06	1.46208e+06	1.73593e+06	1.94255e+06	1.20353e+06	2.64709e+06	2.35224e+06	3.00442e+06	2.52126e+06	2.41621e+06	1.89412e+06	1.01396e+06	953528	2.0974e+06	786670	2.00459e+06	1.35668e+06	2.94801e+06	2.47331e+06	2.04113e+06	1.23781e+06
High	QQTHMLDVMQDHFSR	[R].QQTHMLDVMQDHFSR.[A]	1xOxidation [M]	2.9323e-06	0.000386037	1	1	230	P10909	P10909 [168-182]		0	1888.84	15	2.77561e+06	4.46953e+06	4.35506e+06	3.43513e+06	4.70399e+06	5.29401e+06	5.59306e+06	5.68871e+06	5.78927e+06	3.82861e+06	5.1598e+06	4.931e+06	3.58904e+06	6.05388e+06	4.46032e+06	4.4696e+06	2.52675e+06	3.16215e+06	2.85577e+06	4.3776e+06	4.00516e+06	4.72993e+06	3.92802e+06	3.85585e+06	4.50991e+06	3.02297e+06	2.47586e+06	3.17924e+06	2.68037e+06	3.9344e+06	2.56581e+06	3.96694e+06	4.33449e+06	3.84662e+06	2.84081e+06
High	QQTHMLDVMQDHFSR	[R].QQTHMLDVMQDHFSR.[A]	2xOxidation [M5; M9]	2.09727e-05	0.000386037	1	1	361	P10909	P10909 [168-182]		0	1904.84	15	4.05502e+06	6.90795e+06	7.51541e+06	3.28577e+06	3.6757e+06	3.84963e+06	4.0551e+06	3.11941e+06	3.9941e+06	3.35718e+06	3.67175e+06	4.00374e+06	3.13143e+06	3.67396e+06	3.44103e+06	5.18509e+06	3.53092e+06	3.24573e+06	6.73166e+06	3.02952e+06	4.70973e+06	3.14156e+06	3.20543e+06	3.34435e+06	3.85644e+06	5.18312e+06	2.67246e+06	2.5302e+06	3.69371e+06	3.78103e+06	3.68977e+06	4.1569e+06	2.77242e+06	2.19188e+06	3.48054e+06
High	QRPPDLDTSSNAVDLLFFTDESGDSR	[K].QRPPDLDTSSNAVDLLFFTDESGDSR.[G]		7.26939e-19	0.000386037	1	1	217	P00736	P00736 [271-296]		0	2882.34	26	8.75053e+06	6.64207e+06	6.54838e+06	7.41109e+06	8.63884e+06	7.01733e+06	7.75973e+06	6.02877e+06	5.47841e+06	7.26777e+06	9.35897e+06	5.02616e+06	8.10149e+06	7.86515e+06	7.00175e+06	7.17416e+06	8.42142e+06	9.4417e+06	6.51046e+06	5.85584e+06	7.18254e+06	6.93529e+06	7.24599e+06	6.71585e+06	9.05516e+06	7.68727e+06	8.63675e+06	7.82994e+06	5.09281e+06	7.78697e+06	5.58537e+06	5.70671e+06	5.78269e+06	6.96138e+06	6.56687e+06
High	QSEDSTFYLGER	[R].QSEDSTFYLGER.[T]		2.60139e-07	0.000386037	1	1	652	P00450	P00450 [721-732]		0	1431.64	12	7.03211e+07	6.31833e+07	8.90984e+07	1.05362e+08	5.53e+07	5.66456e+07	6.12249e+07	5.82212e+07	5.76501e+07	3.91386e+07	7.29628e+07	7.43849e+07	6.72789e+07	6.7046e+07	3.61232e+07	6.37524e+07	7.81038e+07	6.5741e+07	5.11619e+07	5.67963e+07	4.88041e+07	5.72601e+07	7.46843e+07	6.97744e+07	8.49484e+07	5.40065e+07	4.16325e+07	4.33608e+07	1.03087e+08	1.05542e+08	7.34273e+07	5.15299e+07	5.32834e+07	5.36759e+07	7.09079e+07
High	QSGLYFIKPLK	[K].QSGLYFIKPLK.[A]		0.000808402	0.000386037	1	1	73	P02679	P02679 [189-199]		0	1293.76	11	1.56099e+06	858092	1.29229e+06	1.57617e+06	1.22951e+06	1.27373e+06	1.37852e+06	1.46227e+06	1.76611e+06	866091	1.62882e+06	1.01617e+06	594215	771902		1.60141e+06	1.63725e+06	1.92076e+06	1.67042e+06	909280	1.4424e+06	1.09421e+06	356180	1.01787e+06	873807	1.5078e+06	1.07198e+06	1.55138e+06	1.75348e+06	1.2536e+06	874775	2.82007e+06	2.23026e+06	407076	719276
High	QSLEASLAETEGR	[K].QSLEASLAETEGR.[Y]		6.88876e-09	0.000386037	1	1	81	P13645	P13645 [387-399]		0	1390.68	13	1.93256e+06	1.572e+06	2.8651e+06	1.45927e+06	1.01652e+07	5.3448e+06	1.86796e+06	282967	2.40107e+06	3.17358e+06	4.96447e+06	2.69174e+06	1.18796e+06	1.7854e+06	640178	262081	923098	1.78662e+06	2.9573e+06	1.18083e+06	1.27701e+06	1.18601e+06	1.15117e+06	970404	379610	709855	503990		552561	222244	555450	184347	1.13285e+06	296986	827589
High	QSMTLSSEVQIPDFDVDLGTILR	[R].QSMTLSSEVQIPDFDVDLGTILR.[V]		1.32345e-06	0.000386037	1	1	91	P04114	P04114 [1056-1078]		0	2564.29	23		117418				388823																													211859
High	QSMTLSSEVQIPDFDVDLGTILR	[R].QSMTLSSEVQIPDFDVDLGTILR.[V]	1xOxidation [M3]	1.30615e-14	0.000386037	1	1	197	P04114	P04114 [1056-1078]		0	2580.29	23	413262	6.14582e+06	2.9152e+06	5.06922e+06	2.38007e+06	7.40149e+06	1.83847e+06	5.05737e+06	2.75299e+06	3.47156e+06	2.93853e+06	657130	5.16416e+06	3.47014e+06	5.2118e+06	3.33349e+06	2.42654e+06	2.76576e+06	5.47178e+06	2.32353e+06	3.40377e+06	4.14267e+06	1.68598e+06	2.30962e+06	2.16014e+06	6.95913e+06	4.34425e+06	3.47036e+06	1.40152e+06	1.71266e+06	2.05566e+06	1.39322e+06	517327	5.75859e+06	5.42656e+06
High	QSSSYSFFK	[K].QSSSYSFFK.[E]		0.00103853	0.000386037	1	1	400	P04003	P04003 [439-447]		0	1080.5	9	2.38112e+07	1.26539e+07	1.54404e+07	2.37448e+07	1.84901e+07	2.30589e+07	1.73948e+07	2.30261e+07	1.69855e+07	1.56529e+07	2.05513e+07	2.8191e+07	2.2298e+07	2.45128e+07	2.26293e+07	2.47782e+07	2.04227e+07	2.56301e+07	2.20836e+07	1.61686e+07	2.66686e+07	2.11972e+07	1.47919e+07	2.08807e+07	1.80124e+07	1.99337e+07	1.0628e+07	2.13123e+07	1.80598e+07	1.69296e+07	1.6592e+07	2.13224e+07	2.11706e+07	1.22954e+07	1.88316e+07
High	QSTLSYQEPLRT	[R].QSTLSYQEPLRT.[-]		0.000119191	0.000386037	1	1	45	P05160	P05160 [650-661]		1	1422.72	12	2.08028e+06	983054	1.18862e+06	630726		1.0288e+06	1.50171e+06	966611		1.19898e+06	891981	564301	1.38772e+06	923230	1.17359e+06	814274	1.40565e+06	744594	1.26664e+06	620327	616763		854864	1.205e+06			1.13503e+06	1.07551e+06	793269	834829	488642	1.21915e+06			879364
High	QSTNAYPDLR	[R].QSTNAYPDLR.[S]		0.000409763	0.000386037	1	1	177	P07225	P07225 [102-111]		0	1164.56	10	6.81477e+06	4.07076e+06	5.24668e+06	5.69452e+06	5.4045e+06	6.5249e+06	4.64174e+06	5.53009e+06	4.32289e+06	5.10089e+06	2.79485e+06	6.14521e+06	3.47154e+06	6.21212e+06	7.22211e+06	4.53418e+06	4.11101e+06	5.09609e+06	4.54608e+06	4.78832e+06	3.40142e+06	4.41912e+06	3.21088e+06	5.83634e+06	1.95145e+06	4.79221e+06	1.86635e+06	4.52799e+06	4.95659e+06	1.57524e+06	4.7802e+06	3.10083e+06	4.72024e+06	1.53996e+06	4.63892e+06
High	QSVEADINGLR	[R].QSVEADINGLR.[KR]		0.000118133	0.000386037	1	3	84	P13645	P13645 [246-256]		0	1201.62	11	1.51034e+06	1.12831e+06	2.38426e+06	731403	5.23269e+06	3.21083e+06	843712		1.12145e+06	2.35508e+06	2.52107e+06	1.36525e+06	462773	1.06139e+06	374852			941787	1.10514e+06	612337	780697	815899	539117	631111		465276	219541				268220		516917		362406
High	QSVEADINGLRR	[R].QSVEADINGLRR.[V]		0.00712057	0.000386037	1	2	69	P13645	P13645 [246-257]		1	1357.72	12	1.40919e+06	1.34941e+06	2.79774e+06	891366	6.19437e+06	4.31279e+06	1.56263e+06		1.68374e+06	3.24163e+06	4.48407e+06	1.88806e+06	737747	1.34897e+06	824273		501807	1.6586e+06	2.31702e+06	1.21665e+06	1.31718e+06	1.09902e+06	602741	555270		1.02865e+06	576450				324347		1.20124e+06		582690
High	QQDHFFQAAFLEER	[K].QQDHFFQAAFLEER.[D]		0.00384371	0.000386037	1	1	11	P08567	P08567 [76-89]		0	1765.83	14	274985	516074	381613	198184		228394		384356	206443		283424		250682		220157	181033	535637	346342	252883	254252	245463	323587	234071	315419	194605	225283	249557	333230	265882	235397	248032	279282	343743	268370	275713
High	QPVPGQQMTLK	[R].QPVPGQQMTLK.[I]	1xOxidation [M8]	0.000375974	0.000386037	1	1	237	P01024	P01024 [574-584]		0	1242.65	11	2.16794e+07	2.13032e+07	2.43781e+07	1.66034e+07	1.60975e+07	1.60249e+07	2.82511e+07	1.43358e+07	1.80043e+07	1.555e+07	1.45754e+07	1.56584e+07	1.17226e+07	1.36168e+07	1.51319e+07	1.25899e+07	1.55115e+07	1.16785e+07	1.7091e+07	1.18434e+07	1.37786e+07	1.16837e+07	8.6154e+06	9.58299e+06	1.46165e+07	1.18981e+07	1.34652e+07	9.19554e+06	1.27118e+07	1.14717e+07	1.21638e+07	9.16342e+06	1.06756e+07	8.35894e+06	8.66703e+06
High	QPSSAFAAFVK	[R].QPSSAFAAFVK.[R]		0.000341918	0.000386037	1	1	274	P01024	P01024 [1061-1071]		0	1152.6	11	9.28813e+07	1.0279e+08	8.08875e+07	7.83751e+07	8.81208e+07	7.02591e+07	8.39993e+07	7.47415e+07	7.77961e+07	6.29899e+07	7.5537e+07	9.49978e+07	6.06684e+07	8.84879e+07	7.33337e+07	8.8795e+07	8.52113e+07	7.85719e+07	8.9398e+07	6.77197e+07	8.44987e+07	8.94019e+07	4.97519e+07	6.74995e+07	8.22492e+07	7.75979e+07	7.37311e+07	7.88111e+07	7.18074e+07	7.25675e+07	6.64256e+07	7.20901e+07	7.86515e+07	5.69871e+07	6.0838e+07
High	QPFVQGLALYTPVVLPR	[K].QPFVQGLALYTPVVLPR.[S]		8.47787e-12	0.000386037	1	1	514	P01019	P01019 [221-237]		0	1898.09	17	6.40114e+06	7.00173e+06	1.7591e+07	6.21218e+06	5.31246e+06	5.0803e+06	7.012e+06	5.81088e+06	5.44808e+06	6.88698e+06	6.06246e+06	5.62382e+06	7.05019e+06	5.55689e+06	8.01668e+06	7.32001e+06	4.67708e+06	6.67827e+06	8.41427e+06	1.05186e+07	7.57756e+06	7.1765e+06	6.70896e+06	6.73597e+06	1.88023e+07	1.02428e+07	6.10266e+06	7.00607e+06	1.01208e+07	1.8657e+07	7.10815e+06	7.39512e+06	5.92348e+06	6.09978e+06	5.98909e+06
High	QKVEPLRAELQEGAR	[R].QKVEPLRAELQEGAR.[Q]		0.000319047	0.000386037	1	1	198	P02647	P02647 [141-155]		2	1723.94	15	1.82022e+07	1.21495e+07	2.36599e+07	1.49559e+07	1.87486e+07	1.97687e+07	3.10771e+07	1.46717e+07	1.77985e+07	2.1835e+07	2.09415e+07	2.00716e+07	1.92328e+07	1.37174e+07	1.53534e+07	2.19076e+07	1.96003e+07	1.96198e+07	2.7327e+07	2.50874e+07	1.95386e+07	1.00866e+07	1.00913e+07	1.23005e+07	1.79114e+07	2.10835e+07	1.23688e+07	1.7248e+07	2.27556e+07	3.172e+07	2.4946e+07	2.30672e+07	2.87387e+07	2.05972e+07	6.47912e+06
High	QKWEAEPVYVQR	[K].QKWEAEPVYVQR.[A]		0.00235076	0.000386037	1	1	6	P25311	P25311 [166-177]		1	1532.79	12	415014	431060	304339	248413	306532	399849	295381	399138	409950	345682	227568	373849	291930	219654	208369	261899	202687	142756	304095	288780	328176	214488	194089	222974	243157	328671	202597	215861	219380	175708	328623	463393		506814	232910
High	QLFALYSGNDVTDISDDRFPKPPEIANGYVEHLFR	[R].QLFALYSGNDVTDISDDRFPKPPEIANGYVEHLFR.[Y]		0.000324622	0.000386037	1	1	2	P00739	P00739 [16-50]		1	4023.99	35			326534	204041	85496.6	1.21429e+06		1.12562e+06					1.56449e+06	1.33837e+06		1.67247e+06	671236				1.50874e+06		1.06882e+06			2.22123e+06	2.00423e+06	186346		1.1477e+06	882680			5.24178e+06	288273
High	QIGGDGMMDITDTYK	[K].QIGGDGMMDITDTYK.[F]	2xOxidation [M7; M8]	4.09244e-06	0.000386037	1	1	93	P00488	P00488 [469-483]		0	1676.71	15	917651	804385	966833	667036	665218	736436	1.21953e+06	703125	912983	624539	596916	849299	726257	571985	813119	846608	1.22264e+06	912449	950697	640765	729800	639930	688962	742726	568756	790655	1.05613e+06	864328	1.06201e+06	881569	794337	855788	562977	409718	535700
High	QLGLPGPPDVPDHAAYHPFR	[R].QLGLPGPPDVPDHAAYHPFR.[R]		3.23162e-15	0.000386037	1	1	773	Q14624	Q14624 [669-688]		0	2184.1	20	2.07381e+07	1.79853e+07	1.85088e+07	2.25768e+07	2.35079e+07	1.50786e+07	1.79135e+07	1.87761e+07	1.52442e+07	1.42866e+07	2.23738e+07	1.98973e+07	9.82755e+06	1.48503e+07	1.5043e+07	1.05144e+07	2.34225e+07	1.4743e+07	2.14146e+07	1.71119e+07	1.86321e+07	1.39246e+07	1.71481e+07	2.46946e+07	9.09002e+06	1.83254e+07	8.29237e+06	2.14174e+07	1.64487e+07	5.10892e+06	1.34424e+07	1.20823e+07	1.6293e+07	7.80313e+06	1.62543e+07
High	QLNEINYEDHK	[K].QLNEINYEDHK.[L]		9.57899e-06	0.000386037	1	1	689	P00751	P00751 [338-348]		0	1402.66	11	7.22267e+07	6.49217e+07	7.05232e+07	7.11276e+07	5.40894e+07	3.95898e+07	4.2613e+07	5.13748e+07	4.85969e+07	6.56706e+07	4.84627e+07	7.58373e+07	4.76579e+07	6.0745e+07	5.28412e+07	4.62931e+07	4.95504e+07	5.96566e+07	6.44757e+07	5.44759e+07	4.99114e+07	7.40827e+07	4.14932e+07	5.68243e+07	6.46526e+07	4.86813e+07	4.41838e+07	4.17586e+07	6.18493e+07	5.96662e+07	4.58987e+07	3.42819e+07	4.40333e+07	4.36593e+07	3.82555e+07
High	QLPGGQNPVSYVYLEVVSK	[K].QLPGGQNPVSYVYLEVVSK.[H]		4.02572e-09	0.000386037	1	1	139	P01031	P01031 [91-109]		0	2077.1	19	745592	914959	833890	996053	918344	855796	906735	805559	664221	1.13596e+06	955764	675458	955513	1.24408e+06	1.22639e+06	908347	651506	1.30452e+06	892478	688443	839906	1.22794e+06	652110	1.139e+06	1.14897e+06	1.14793e+06	1.15014e+06	1.22154e+06	570097	1.12537e+06	714177	718887	830752	929139	1.06862e+06
High	QIQVFEDEPAR	[R].QIQVFEDEPAR.[I]		0.00233197	0.000386037	1	1	10	Q9NPH3	Q9NPH3 [34-44]		0	1331.66	11	471023		400208	339023	379030	329223		241870				451322	533094	285257	277358	418533	443541	375415	283672	351869		242514		264024	221041	380857		288586	553844	511138				335228	261999
High	QSVGNEAEIWLGLNDMAAEGTWVDMTGAR	[R].QSVGNEAEIWLGLNDMAAEGTWVDMTGAR.[I]	2xOxidation [M16; M25]	1.03048e-07	0.000386037	1	1	33	P05452	P05452 [123-151]		0	3153.43	29	282993	509859	315037			449170							703267		595165	636473	508327	516686	287110			674033	481399		630592	211318			207799		529537		450406
High	QIQVSWLR	[R].QIQVSWLR.[E]		0.00524515	0.000386037	1	1	233	P01871	P01871 [143-150]		0	1029.58	8	6.46133e+06	1.12253e+07	5.72946e+06	9.01597e+06	9.06083e+06	2.12393e+07	7.68397e+06	9.00829e+06	2.17921e+07	1.51434e+07	6.97817e+06	5.00419e+06	1.33901e+07	3.98219e+06	9.48579e+06	4.93228e+06	7.51181e+06	4.4074e+06	8.60315e+06	1.96049e+07	1.85605e+07	5.62197e+06	1.93029e+07	7.04558e+06	8.92183e+06	1.19631e+07	9.09795e+06	7.33197e+06	1.92163e+07	1.36647e+07	5.8526e+06	6.10031e+06	1.01504e+07	9.9887e+06	5.89208e+06
High	QISNLQQSISDAEQRGENALK	[K].QISNLQQSISDAEQRGENALK.[D]		1.46853e-10	0.000386037	1	1	15	P04264	P04264 [418-438]		1	2329.17	21					1.34544e+06	917008				2.40871e+06	1.20603e+06										394297
High	QLTSGPNQEQVSPLTLLK	[R].QLTSGPNQEQVSPLTLLK.[L]		2.00245e-11	0.000386037	1	1	183	P08697	P08697 [34-51]		0	1953.07	18	2.41847e+06	2.68368e+06	3.24972e+06		2.23315e+06	3.4859e+06	2.39644e+06	1.61725e+06	1.30162e+06	2.14323e+06	1.3556e+06	2.80404e+06	2.39464e+06	2.38424e+06	1.2494e+06	2.74219e+06	1.18283e+06	2.24615e+06	2.20759e+06	1.65652e+06	1.0367e+06	1.42071e+06	1.93206e+06	3.11193e+06	3.08954e+06	3.11126e+06	2.57545e+06	1.41055e+06	1.37388e+06	3.68571e+06	1.59647e+06	1.9492e+06	3.0979e+06	1.33796e+06	849978
High	QITVNDLPVGR	[R].QITVNDLPVGR.[S]		0.00106474	0.000386037	1	2	7	P32119	P32119 [140-150]		0	1211.67	11	207043	92490.2	96349.1		227272	214882	112612		101920	113844	153837		140581	100382	88852.7	147111	110624	162154		1.35232e+06	199005	160135					221616		2.05224e+06		111510	182299		200807
High	QLVHHFEIDVDIFEPQGISK	[K].QLVHHFEIDVDIFEPQGISK.[L]		4.2689e-17	0.000386037	1	1	183	P19827	P19827 [185-204]		0	2351.2	20	6.28665e+06	1.79678e+07	1.38205e+07	2.54586e+07	1.21624e+07	1.71803e+07	1.5875e+07	1.32222e+07	1.12896e+07	1.73087e+07	1.69013e+07	7.41815e+06	1.49127e+07	1.50804e+07	1.53902e+07	1.38537e+07	1.47183e+07	1.59966e+07	1.41621e+07	1.39214e+07	1.49819e+07	8.40857e+06	1.3812e+07	1.47561e+07	1.20211e+07	1.7295e+07	1.79958e+07	1.97048e+07	6.64764e+06	1.60827e+07	1.28254e+07	9.12968e+06	9.77811e+06	1.26259e+07	1.38974e+07
High	QLYGDTGVLGR	[R].QLYGDTGVLGR.[F]		8.33091e-05	0.000386037	1	1	124	P07360	P07360 [101-111]		0	1178.62	11	9.70883e+06	6.04282e+06	7.89593e+06	7.70244e+06	8.18791e+06	5.67706e+06	5.85392e+06	5.42237e+06	6.14635e+06	5.42349e+06	6.75004e+06	6.85146e+06	5.78663e+06	5.35247e+06	3.45798e+06	6.95936e+06	5.60501e+06	6.98801e+06	5.13836e+06	3.14518e+06	5.27093e+06	6.7939e+06	6.02261e+06	6.22006e+06	5.30035e+06	4.44398e+06	4.33725e+06	4.541e+06	5.01531e+06	5.93127e+06	5.22501e+06	4.66518e+06	6.99451e+06	5.47497e+06	5.12805e+06
High	QLYNVEATSYALLALLQLK	[K].QLYNVEATSYALLALLQLK.[D]		2.7439e-14	0.000386037	1	1	666	P01024	P01024 [1226-1244]		0	2151.21	19	1.19111e+07	2.3756e+07	1.52874e+07	3.15005e+07	3.13774e+07	2.92837e+07	1.64114e+07	3.0186e+07	1.78318e+07	5.09842e+07	3.43921e+07	1.25784e+07	1.60231e+07	2.27557e+07	2.43049e+07	2.50451e+07	1.66364e+07	2.91745e+07	3.2538e+07	2.06292e+07	4.4574e+07	3.02321e+07	9.0136e+06	2.47245e+07	3.08092e+07	3.62043e+07	3.85667e+07	2.91199e+07	1.01858e+07	1.91152e+07	2.01348e+07	1.2736e+07	1.34269e+07	2.35734e+07	3.05287e+07
High	QNCELFEQLGEYK	[K].QNCELFEQLGEYK.[F]	1xCarbamidomethyl [C3]	1.22278e-09	0.000386037	1	1	1616	P02768	P02768 [414-426]		0	1657.75	13	3.12554e+08	2.82749e+08	2.44181e+08	2.20968e+08	3.13978e+08	2.45561e+08	3.54633e+08	2.45727e+08	2.39857e+08	2.70736e+08	2.34721e+08	2.64436e+08	2.25704e+08	2.73573e+08	2.62148e+08	1.91607e+08	2.68301e+08	2.98384e+08	2.05933e+08	2.86833e+08	2.46013e+08	1.60744e+08	2.84036e+08	2.94869e+08	1.93019e+08	2.17615e+08	2.08414e+08	2.08795e+08	3.24151e+08	2.42424e+08	3.02657e+08	2.91099e+08	2.79401e+08	2.82697e+08	2.89062e+08
High	QNDFNSVEEK	[K].QNDFNSVEEK.[K]		0.00105593	0.000386037	1	1	135	P10643	P10643 [326-335]		0	1209.54	10	5.84904e+06	8.92281e+06	4.7578e+06	5.5931e+06	8.36044e+06	6.31028e+06	6.48415e+06	5.91044e+06	5.80091e+06	6.16162e+06	5.95732e+06	5.47707e+06	4.84278e+06	3.62613e+06	3.07544e+06	4.08049e+06	8.02363e+06	5.63731e+06	6.54617e+06	5.23412e+06	4.69511e+06	3.86965e+06	9.18752e+06	3.99103e+06	3.92462e+06	4.92378e+06	5.44946e+06	3.13734e+06	5.20683e+06	4.49687e+06	8.03375e+06	5.01682e+06	4.85017e+06	5.33519e+06	4.20331e+06
High	QISNLQQSISDAEQR	[K].QISNLQQSISDAEQR.[G]		1.11444e-11	0.000386037	1	1	127	P04264	P04264 [418-432]		0	1716.85	15	2.72907e+06	3.12884e+06	3.72896e+06	2.42515e+06	1.0998e+07	6.64173e+06	2.43726e+06	996085	3.5271e+06	1.18898e+07	7.46009e+06	3.87513e+06	846338	2.16307e+06	1.58122e+06	1.28974e+06	1.43772e+06	1.75723e+06	2.67013e+06	2.49198e+06	1.70514e+06	1.81096e+06	1.55657e+06	1.38353e+06	214429	2.12166e+06	497222	197270	766230		964774		1.7165e+06	284606	574497
High	QTALVELVK	[K].QTALVELVK.[H]		0.00242738	0.000386037	1	1	9173	P02768	P02768 [550-558]		0	1000.6	9	7.63921e+09	2.52981e+09	5.43461e+09	2.05312e+09	4.02426e+09	4.14139e+09	2.7348e+09	2.07769e+09	2.35093e+09	5.64884e+09	2.73535e+09	2.64748e+09	5.04809e+09	2.66193e+09	2.44278e+09	4.64962e+09	2.74127e+09	5.11423e+09	4.11915e+09	6.00758e+09	4.24396e+09	1.96747e+09	2.94324e+09	4.2153e+09	2.14106e+09	1.98874e+09	2.16398e+09	2.12431e+09	4.98543e+09	2.28822e+09	2.74675e+09	2.59804e+09	2.50863e+09	2.28408e+09	2.28558e+09
High	QTEATMTFK	[K].QTEATMTFK.[Y]		0.00750776	0.000386037	1	1	154	P04114	P04114 [1044-1052]		0	1056.5	9	2.65343e+06	5.06069e+06	4.03233e+06	4.43314e+06	4.90856e+06	7.87682e+06	4.43219e+06	9.81342e+06	6.61971e+06	5.07891e+06	3.5667e+06	4.6489e+06	6.88568e+06	6.30231e+06	7.29213e+06	3.74022e+06	3.36013e+06	4.7576e+06	4.02167e+06	6.76368e+06	3.84341e+06	8.20032e+06	5.15714e+06	4.23669e+06	3.47541e+06	2.64942e+06	4.65631e+06	4.55799e+06	3.46189e+06	2.53643e+06	2.60336e+06	4.53373e+06	3.09596e+06	7.69045e+06	4.55326e+06
High	QTHQPPAPNSLIR	[R].QTHQPPAPNSLIR.[F]		8.65906e-07	0.000386037	1	1	201	P02747	P02747 [127-139]		0	1458.78	13	5.36245e+06	6.85106e+06	4.17249e+06	5.12463e+06	5.9354e+06	4.3592e+06	9.35215e+06	6.49078e+06	6.36153e+06	5.13972e+06	6.96915e+06	5.23952e+06	6.33362e+06	4.07476e+06	4.1645e+06	4.32142e+06	5.82288e+06	5.81798e+06	6.42197e+06	5.96746e+06	6.80482e+06	5.27515e+06	4.24572e+06	3.89841e+06	4.66009e+06	7.59196e+06	5.04197e+06	6.10249e+06	4.7084e+06	4.98117e+06	5.52939e+06	7.09949e+06	7.45905e+06	6.16426e+06	3.74033e+06
High	RLYGSEAFATDFQDSAAAK	[K].RLYGSEAFATDFQDSAAAK.[K]		1.4192e-12	0.000386037	1	1	334	P01011	P01011 [159-177]		1	2047.97	19	9.65315e+06	9.82633e+06	7.30617e+06	1.20161e+07	1.21894e+07	1.19405e+07	1.24315e+07	1.02124e+07	1.20485e+07	1.30013e+07	1.93966e+07	1.46691e+07	1.7091e+07	1.6313e+07	1.00436e+07	1.96086e+07	1.73016e+07	1.61867e+07	1.52381e+07	1.39938e+07	1.52546e+07	1.62722e+07	1.30372e+07	1.58686e+07	1.85688e+07	2.71168e+07	1.55373e+07	1.95947e+07	2.03697e+07	1.86714e+07	1.75996e+07	1.9074e+07	2.05613e+07	1.50099e+07	1.34805e+07
High	RNDYLDIYAIGVGK	[K].RNDYLDIYAIGVGK.[L]		4.9061e-08	0.000386037	1	1	143	P06681	P06681 [402-415]		1	1596.84	14	2.04108e+06	1.75562e+06	1.5939e+06	1.69478e+06	1.60786e+06	1.36284e+06	1.912e+06	1.3187e+06	1.56566e+06	1.68183e+06	2.26531e+06	1.42599e+06	1.4622e+06	1.58275e+06	1.2776e+06	1.99485e+06	1.71953e+06	1.69612e+06	2.02715e+06	1.20577e+06	1.7303e+06	1.25758e+06	823339	1.6312e+06	1.44075e+06	1.62238e+06	1.60082e+06	1.72472e+06	1.74729e+06	1.80159e+06	1.51352e+06	1.43667e+06	2.27612e+06	1.00548e+06	1.14861e+06
High	RNTEILTGSWSDQTYPEGTQAIYK	[R].RNTEILTGSWSDQTYPEGTQAIYK.[C]		0.000462042	0.000386037	1	1	1	P08603	P08603 [28-51]		1	2758.33	24										357499		363498							754182		988383					469489		773881
High	RPCFSALEVDETYVPK	[R].RPCFSALEVDETYVPK.[E]	1xCarbamidomethyl [C3]	1.34168e-11	0.000386037	1	1	730	P02768	P02768 [509-524]		0	1910.93	16	2.61699e+07	3.18598e+07	2.34139e+07	2.08642e+07	4.01852e+07	2.64463e+07	4.4264e+07	3.03261e+07	3.66046e+07	4.07917e+07	3.78224e+07	2.85272e+07	3.06976e+07	2.60879e+07	2.6167e+07	2.54271e+07	3.90106e+07	3.28961e+07	4.35003e+07	4.75515e+07	4.75184e+07	1.84189e+07	3.29198e+07	3.40922e+07	2.57468e+07	4.69718e+07	3.14962e+07	3.66205e+07	3.95305e+07	3.66823e+07	3.98676e+07	6.11396e+07	5.56244e+07	3.56695e+07	2.83097e+07
High	RPGGEPSPEGTTGQSYNQYSQR	[R].RPGGEPSPEGTTGQSYNQYSQR.[Y]		7.65182e-18	0.000386037	1	1	194	P02751	P02751 [2335-2356]		0	2396.09	22	2.81009e+06	2.19459e+06	7.11403e+06	2.53042e+06	1.59018e+06	2.50861e+06	4.5663e+06	3.09897e+06	3.7081e+06	3.98476e+06	2.60791e+06	2.46184e+06	1.88098e+06	1.48266e+06	1.41491e+06	1.53661e+06	2.99184e+06	2.83451e+06	3.61619e+06	4.38474e+06	3.55123e+06	1.60247e+06	606288	1.31397e+06	1.24285e+06	5.90895e+06	1.1669e+06	3.37364e+06	3.72664e+06	1.51986e+06	4.59587e+06	4.54681e+06	4.96836e+06	1.5742e+06	1.09887e+06
High	RPHFFFPK	[R].RPHFFFPK.[S]		0.00722923	0.000386037	1	1	1	P10909	P10909 [215-222]		0	1075.58	8																												297896
High	RQDNEILIFWSK	[K].RQDNEILIFWSK.[D]		0.000525194	0.000386037	1	1	13	P02741	P02741 [76-87]		1	1548.82	12	83048	76025	230209	190523				261136		529283						152410	115634		61792.8	120611	113368	267235			706519	95577.3		72608.7	90977.7	130585		1.05523e+06	60118.7	118016
High	RQSEDSTFYLGER	[R].RQSEDSTFYLGER.[T]		8.33091e-05	0.000386037	1	1	237	P00450	P00450 [720-732]		1	1587.74	13	6.44986e+06	5.39501e+06	9.23506e+06	7.37996e+06	5.32132e+06	5.38962e+06	6.66063e+06	5.7648e+06	5.97898e+06	5.21014e+06	7.447e+06	5.92064e+06	6.25177e+06	5.38267e+06	4.78191e+06	6.8669e+06	7.19869e+06	5.92825e+06	8.53506e+06	8.97249e+06	6.40139e+06	5.38401e+06	5.21847e+06	6.27385e+06	7.77446e+06	1.01078e+07	6.7682e+06	5.81233e+06	8.7445e+06	1.17044e+07	7.53178e+06	7.29809e+06	7.50385e+06	5.86858e+06	6.43843e+06
High	RIPIEDGSGEVVLSR	[K].RIPIEDGSGEVVLSR.[K]		1.00091e-11	0.000386037	1	1	724	P01024	P01024 [290-304]		1	1626.88	15	6.20829e+07	5.8566e+07	5.8722e+07	5.30093e+07	5.98749e+07	5.0651e+07	5.68897e+07	4.91575e+07	6.16966e+07	5.95088e+07	5.78207e+07	6.03179e+07	5.58329e+07	5.34827e+07	2.95919e+07	6.30638e+07	5.79289e+07	5.38138e+07	4.90446e+07	3.61566e+07	7.31477e+07	6.26096e+07	2.82189e+07	5.20579e+07	6.0037e+07	7.65014e+07	4.3529e+07	7.24557e+07	6.00989e+07	6.07702e+07	5.80302e+07	5.95579e+07	7.58103e+07	5.63193e+07	4.95941e+07
High	RVAEGTQVLELPFK	[R].RVAEGTQVLELPFK.[G]		0.000743244	0.000386037	1	1	12	P01008	P01008 [294-307]		1	1586.89	14	450161	373977	327288	267885	268603	317821	647752	545976	622021		601070	485261	464857	287075	378181	538415	503399	471187	626083	627979	532516	300978	471569	357975	315340	799693	534654	579054	564641	486857	464125	908637	1.28639e+06	288506	323634
High	RVEPYGENFNK	[R].RVEPYGENFNK.[A]		0.000458103	0.000386037	1	1	369	P06727	P06727 [306-316]		1	1352.66	11	1.41254e+07	1.73064e+07	1.51037e+07	1.09851e+07	2.26396e+07	1.62287e+07	1.80015e+07	1.65464e+07	1.79063e+07	2.10223e+07	1.17607e+07	1.93033e+07	1.58556e+07	1.37355e+07	1.406e+07	1.60574e+07	1.28169e+07	1.54811e+07	2.13113e+07	1.98532e+07	1.81007e+07	1.13833e+07	1.27082e+07	1.44567e+07	2.59216e+07	1.93271e+07	1.35908e+07	1.50998e+07	2.01559e+07	1.05276e+07	1.19948e+07	2.16128e+07	1.94574e+07	1.85763e+07	1.13997e+07
High	RVINLPLDSMAAPWETGDTFPDVVAIAPDVR	[R].RVINLPLDSMAAPWETGDTFPDVVAIAPDVR.[A]		0.00103853	0.000386037	1	1	7	Q96PD5	Q96PD5 [136-166]		1	3365.72	31			171563		139682	451976		204787	385579	489150	1.03947e+06		609342	558489	225300	550794	138947	191885		291400	828663		182688	349849	183297		959737	531838	128067		353674	529921		991220	501936
High	SAFSVGLETYVTIPNMPIR	[R].SAFSVGLETYVTIPNMPIR.[F]		1.74224e-08	0.000386037	1	1	15	Q15848	Q15848 [113-131]		0	2095.09	19			146946	138665	112871	291455		164387	135920							172011				272306				290442		364855								153351
High	SAFSVGLETYVTIPNMPIR	[R].SAFSVGLETYVTIPNMPIR.[F]	1xOxidation [M16]	0.000231176	0.000386037	1	1	44	Q15848	Q15848 [113-131]		0	2111.08	19	176398	344542	639759	337714	324830	699339	403187	129527	191849	263581	519180		339260	268801	243270	587392	522527	363715	318048	530986	204261	160111	494239	706594	351407	596407	325285	279543	349567	822710	402980	201005	187286	298982	598844
High	SAGWNIPIGLLYCDLPEPR	[R].SAGWNIPIGLLYCDLPEPR.[K]	1xCarbamidomethyl [C13]	3.35691e-05	0.000386037	1	1	27	P02787	P02787 [144-162]		0	2171.1	19	115490	173294		82521.3	228585	157227		188249		239943	163897	110280	257870	142051		160063	118561		268280	130185		112611	144347	70492.1	240057		143452	154420	164277	226474	188697	132162	157941	128940
High	SALYSPSDPLTLLQADTVR	[R].SALYSPSDPLTLLQADTVR.[G]		8.57583e-07	0.000386037	1	1	3	O00391	O00391 [33-51]		0	2047.07	19
High	SASDLTWDNLK	[K].SASDLTWDNLK.[G]		1.55233e-07	0.000386037	1	1	1434	P02787	P02787 [454-464]		0	1249.61	11	4.61211e+08	4.1834e+08	5.64275e+08	3.67889e+08	3.85796e+08	3.15956e+08	3.9862e+08	4.04592e+08	3.98543e+08	3.80176e+08	5.49973e+08	6.27292e+08	6.22511e+08	5.02134e+08	3.98397e+08	5.12924e+08	5.36622e+08	4.69725e+08	4.27467e+08	4.23137e+08	4.07266e+08	4.76516e+08	5.90606e+08	4.90281e+08	5.70771e+08	4.38894e+08	3.71874e+08	4.12299e+08	6.17622e+08	5.13404e+08	5.77779e+08	4.77055e+08	5.39529e+08	4.76722e+08	3.80057e+08
High	SASNMAIVDVK	[R].SASNMAIVDVK.[M]		3.65101e-06	0.000386037	1	1	364	P01023	P01023 [1374-1384]		0	1134.58	11	3.33366e+07	3.66409e+07	2.06154e+07	2.93655e+07	3.82291e+07	3.02528e+07	4.34266e+07	3.59262e+07	5.14798e+07	2.92627e+07	4.57887e+07	3.6603e+07	2.65888e+07	2.91594e+07	2.63298e+07	2.11422e+07	2.67085e+07	4.34689e+07	1.46635e+07	4.89709e+07	2.35447e+07	2.97375e+07	5.16617e+07	4.01068e+07	3.87287e+07	1.49447e+07	1.96665e+07	2.79718e+07	2.98437e+07	3.13427e+07	3.58733e+07	4.0046e+07	3.2411e+07	5.25877e+07	3.84266e+07
High	RVDTVDPPYPR	[R].RVDTVDPPYPR.[S]		0.000129135	0.000386037	1	1	392	P04004	P04004 [453-463]		1	1314.68	11	1.34225e+07	1.25002e+07	2.7239e+07	1.15506e+07	1.6543e+07	1.12043e+07	1.33458e+07	1.32026e+07	2.40802e+07	1.51884e+07	1.43673e+07	1.25816e+07	1.28686e+07	1.09454e+07	1.14165e+07	1.33789e+07	1.17679e+07	1.28972e+07	1.79695e+07	1.64816e+07	1.53358e+07	1.40741e+07	9.33602e+06	1.27745e+07	1.57564e+07	1.54843e+07	1.31945e+07	1.5794e+07	1.71838e+07	1.60727e+07	1.62408e+07	1.20647e+07	1.57228e+07	1.52902e+07	8.6198e+06
High	QKPDGVFQEDAPVIHQEMIGGLR	[K].QKPDGVFQEDAPVIHQEMIGGLR.[N]		3.24748e-17	0.000386037	1	1	548	P01024	P01024 [1112-1134]		0	2564.29	23	3.7352e+07	3.20644e+07	1.98759e+07	3.41272e+07	3.2073e+07	3.27285e+07	3.64598e+07	4.57495e+07	4.54232e+07	3.27991e+07	2.96533e+07	3.89263e+07	2.79727e+07	3.62856e+07	2.84533e+07	2.80293e+07	2.48742e+07	2.79898e+07	2.23394e+07	3.46244e+07	4.09041e+07	3.25041e+07	2.22022e+07	3.11269e+07	2.89827e+07	2.15593e+07	2.67921e+07	3.71693e+07	1.7671e+07	2.66948e+07	1.90338e+07	2.9996e+07	3.588e+07	2.774e+07	2.73437e+07
High	RLEVDIDIK	[K].RLEVDIDIK.[I]		0.00767969	0.000386037	1	1	858	P02671	P02671 [168-176]		1	1100.63	9	6.74874e+07	8.23409e+07	8.86832e+07	1.25453e+08	5.20362e+07	8.36639e+07	7.48886e+07	5.66048e+07	6.89889e+07	1.04118e+08	1.06579e+08	4.19858e+07	7.24356e+07	9.44018e+07	5.9631e+07	1.05111e+08	1.17525e+08	1.01182e+08	7.68363e+07	6.62378e+07	1.00361e+08	8.34622e+07	6.21881e+07	8.40331e+07	6.08553e+07	1.14404e+08	6.76022e+07	9.74545e+07	5.73479e+07	7.8064e+07	8.26084e+07	7.92635e+07	9.55941e+07	3.60216e+07	9.70241e+07
High	RHPYFYAPELLYYANK	[R].RHPYFYAPELLYYANK.[Y]		2.84482e-05	0.000386037	1	1	1	P02769	P02769 [168-183]		1	2045.03	16	815979
High	QTIIVVLENVQR	[R].QTIIVVLENVQR.[N]		1.0611e-07	0.000386037	1	1	338	P04114	P04114 [2086-2097]		0	1411.83	12	4.32904e+06	1.10692e+07	1.01318e+07	1.39501e+07	1.01518e+07	1.58973e+07	8.65754e+06	1.57314e+07	1.08487e+07	1.46626e+07	7.84189e+06	5.1251e+06	1.47851e+07	1.21492e+07	1.45334e+07	1.33985e+07	9.69293e+06	8.71744e+06	1.07338e+07	1.08596e+07	1.18168e+07	1.2628e+07	7.89783e+06	8.19852e+06	7.37445e+06	1.11581e+07	1.20973e+07	1.09237e+07	7.2501e+06	7.84478e+06	7.86413e+06	1.07748e+07	4.85103e+06	1.22963e+07	1.00295e+07
High	QTLSWTVTPK	[R].QTLSWTVTPK.[T]		0.000694788	0.000386037	1	1	49	P20742	P20742 [860-869]		0	1160.63	10	1.65074e+06		8.26035e+06	1.01106e+06						489465	993616	1.66151e+06	205795		121551	1.01877e+06	3.01846e+06	1.03013e+06	284703	7.98737e+06	326040	2.43184e+06		1.14546e+06	3.62785e+06	2.88536e+06	151077		1.04387e+07	3.00965e+06			175797	300063	1.50585e+06
High	QTQVSVLPEGGETPLFK	[K].QTQVSVLPEGGETPLFK.[Q]		1.561e-13	0.000386037	1	1	393	P06396	P06396 [374-390]		0	1829.96	17	1.56299e+07	1.27033e+07	1.35114e+07	1.26267e+07	1.38255e+07	1.66022e+07	2.12746e+07	1.69809e+07	1.61209e+07	1.12823e+07	1.17645e+07	1.35624e+07	1.20444e+07	1.31275e+07	1.36592e+07	1.21065e+07	1.33173e+07	1.15232e+07	1.08969e+07	1.24437e+07	1.14777e+07	1.09784e+07	1.86655e+07	1.58838e+07	1.00778e+07	1.03858e+07	1.56917e+07	9.22263e+06	1.38673e+07	8.55529e+06	1.03312e+07	1.26811e+07	1.1449e+07	1.67346e+07	1.30217e+07
High	QTVNLQLQPYSLVTTLNSDLK	[K].QTVNLQLQPYSLVTTLNSDLK.[Y]		1.79852e-15	0.000386037	1	1	353	P04114	P04114 [1782-1802]		0	2375.28	21	2.37699e+06	8.39177e+06	4.46775e+06	5.96469e+06	5.14795e+06	7.59517e+06	3.75273e+06	7.25346e+06	5.08932e+06	6.37428e+06	5.35555e+06	2.2932e+06	8.42471e+06	8.07652e+06	8.29998e+06	7.01735e+06	4.05817e+06	5.53425e+06	8.21523e+06	4.88926e+06	6.76681e+06	7.92615e+06	5.52061e+06	4.81987e+06	5.35838e+06	6.11468e+06	7.41444e+06	9.5438e+06	3.3014e+06	2.86576e+06	5.37263e+06	5.80042e+06	3.01562e+06	7.01103e+06	7.15725e+06
High	QTVSWAVTPK	[R].QTVSWAVTPK.[S]		0.000254496	0.000386037	1	1	302	P01023	P01023 [854-863]		0	1116.6	10	3.38014e+08	2.9565e+08	2.10036e+08	2.28243e+08	2.34502e+08	1.80169e+08	2.55498e+08	1.71502e+08	2.9829e+08	1.57948e+08	3.04274e+08	1.76527e+08	1.87495e+08	1.43771e+08	1.12483e+08	1.85024e+08	2.33142e+08	2.43509e+08	1.21398e+08	1.8482e+08	1.3406e+08	1.4227e+08	2.32026e+08	2.03524e+08	1.97774e+08	1.35252e+08	1.51964e+08	1.46743e+08	2.53843e+08	1.67142e+08	2.86361e+08	1.75486e+08	1.63951e+08	1.98704e+08	1.68048e+08
High	QVGSGVTTDQVQAEAK	[K].QVGSGVTTDQVQAEAK.[E]		2.73722e-15	0.000386037	1	1	1044	P01871	P01871 [154-169]		0	1617.81	16	1.50419e+08	1.66625e+08	1.45693e+08	1.47e+08	1.17213e+08	3.65829e+08	1.10795e+08	1.10148e+08	2.56814e+08	1.95102e+08	9.61609e+07	9.72241e+07	2.09906e+08	7.53875e+07	1.55602e+08	5.8474e+07	1.31292e+08	8.2544e+07	1.02355e+08	2.65177e+08	2.15199e+08	8.85709e+07	4.23041e+08	1.27733e+08	1.49455e+08	1.34176e+08	1.34362e+08	9.78925e+07	2.84928e+08	2.46822e+08	1.21544e+08	5.70011e+07	8.08442e+07	1.50186e+08	1.06444e+08
High	QVLDNLTMEK	[R].QVLDNLTMEK.[S]	1xOxidation [M8]	0.00352564	0.000386037	1	1	84	P35527	P35527 [262-271]		0	1206.6	10	1.56013e+06	1.4204e+06	1.74802e+06	1.24942e+06	6.57595e+06	3.23588e+06	1.622e+06	452806	2.32924e+06	1.00763e+07	5.99957e+06	1.69323e+06	227841	1.29278e+06	1.83621e+06	938352	514003	1.18669e+06	809125	2.0847e+06	1.30812e+06	1.0947e+06	991710	574099		901848	572957	419015	892817	530362	1.01129e+06		508323		753139
High	QVLLVGAPTYDDVSK	[K].QVLLVGAPTYDDVSK.[V]		2.17047e-10	0.000386037	1	1	143	P80108	P80108 [664-678]		0	1604.85	15	1.50367e+06	1.90941e+06	1.16865e+06	1.29019e+06	2.11671e+06	1.81494e+06	1.80065e+06	2.24996e+06	1.91956e+06	1.78946e+06	1.36644e+06	1.81849e+06	1.48323e+06	1.75834e+06	2.03132e+06	1.52042e+06	1.42647e+06	2.05771e+06	1.93693e+06	1.55305e+06	1.23535e+06	1.37648e+06	1.97959e+06	1.73529e+06	1.78281e+06	1.62912e+06	1.79127e+06	1.64113e+06	1.72152e+06	2.06587e+06	1.8312e+06	1.53405e+06	2.08465e+06	2.26337e+06	1.13668e+06
High	RLDYQEGPPGVEISCWSVEL	[R].RLDYQEGPPGVEISCWSVEL.[-]	1xCarbamidomethyl [C15]	1.41925e-05	0.000386037	1	1	84	Q14624	Q14624 [911-930]		1	2334.11	20	423923	1.54055e+06		654853	421965	451537	591054	773060	387102	808824	399964	398209		589646	547427		641216	481691	590685	485141		153937	680166	633714		1.36451e+06	208283	951954	428552		472908		634823		1.63075e+06
High	QVREPGQDLVVLPLSITTDFIPSFR	[R].QVREPGQDLVVLPLSITTDFIPSFR.[L]		3.62454e-12	0.000386037	1	1	136	P01024	P01024 [506-530]		1	2827.54	25	904685	2.23035e+06	893164	1.73897e+06	1.97932e+06	1.39471e+06	2.23958e+06	1.84362e+06	1.24973e+06	2.79513e+06	2.36657e+06	1.1501e+06	2.03805e+06	1.73975e+06	1.42379e+06	2.38707e+06	1.58121e+06	3.31341e+06	3.46444e+06	2.0122e+06	3.93689e+06	2.02522e+06	995593	1.27426e+06	3.17329e+06	5.97564e+06	3.58274e+06	4.7054e+06	1.34073e+06	2.3619e+06	2.07278e+06	3.04717e+06	3.58015e+06	2.83894e+06	2.19522e+06
High	QVVAGLNFR	[R].QVVAGLNFR.[I]		0.00172923	0.000386037	1	1	251	P01042	P01042 [188-196]		0	1003.57	9	7.89137e+06	1.38631e+07	1.38755e+07	9.11553e+06	1.04867e+07	1.04658e+07	1.11362e+07	1.08509e+07	1.17251e+07	9.01288e+06	1.46386e+07	1.22055e+07	1.5404e+07	1.10808e+07	1.05751e+07	1.5623e+07	1.41041e+07	1.39557e+07	1.20593e+07	9.80138e+06	1.48641e+07	1.33267e+07	1.14467e+07	1.22449e+07	1.36997e+07	1.9183e+07	9.99814e+06	1.31271e+07	1.49415e+07	1.62238e+07	1.16886e+07	1.84671e+07	1.78201e+07	8.26093e+06	8.0924e+06
High	QYNVGPSVSK	[R].QYNVGPSVSK.[Y]		0.000295086	0.000386037	1	1	373	P02751	P02751 [1041-1050]		0	1078.55	10	3.08239e+07	1.77871e+07	6.21633e+07	2.07104e+07	1.06694e+07	1.68838e+07	2.59824e+07	2.34138e+07	2.36254e+07	1.84421e+07	1.50771e+07	1.62278e+07	1.31928e+07	1.18033e+07	1.39405e+07	1.01729e+07	2.11211e+07	2.21027e+07	1.1995e+07	2.14955e+07	1.72197e+07	1.4211e+07	9.08309e+06	1.49532e+07	1.36501e+07	1.60855e+07	9.49967e+06	1.82291e+07	2.11246e+07	1.00467e+07	2.71234e+07	1.47986e+07	1.87053e+07	7.72579e+06	1.15054e+07
High	QYTDSTFRVPVER	[R].QYTDSTFRVPVER.[K]		0.000638487	0.000386037	1	1	127	P00450	P00450 [786-798]		1	1597.8	13	2.40005e+06	1.57003e+06	2.74775e+06	3.05255e+06	1.75351e+06	1.82587e+06	2.32999e+06	2.18607e+06	2.52722e+06	2.03373e+06	2.35414e+06	1.99884e+06	1.80358e+06	2.37502e+06	1.05356e+06	2.70336e+06	2.72408e+06	2.69643e+06	2.60754e+06	2.07735e+06	2.12739e+06	1.74339e+06	994757	1.77164e+06	2.56669e+06	3.04275e+06	1.8059e+06	2.33956e+06	4.0506e+06	3.65877e+06	2.57306e+06	2.20626e+06	2.62246e+06	2.35554e+06	1.85159e+06
High	QYYEGSEIVVAGR	[K].QYYEGSEIVVAGR.[I]		2.94515e-09	0.000386037	1	1	684	P19827	P19827 [502-514]		0	1470.72	13	3.47967e+07	2.72443e+07	3.81273e+07	3.61454e+07	2.59604e+07	2.56948e+07	2.85909e+07	3.33989e+07	3.09166e+07	2.6179e+07	2.57297e+07	3.24356e+07	3.00307e+07	2.834e+07	1.82132e+07	2.7002e+07	3.54802e+07	3.15803e+07	2.20667e+07	1.81786e+07	2.29483e+07	1.69832e+07	3.0955e+07	2.87069e+07	2.45813e+07	2.57312e+07	2.26153e+07	3.04013e+07	2.30717e+07	2.79201e+07	2.45904e+07	2.20939e+07	2.94202e+07	2.401e+07	2.61579e+07
High	RDLEIEVVLFHPNYNINGK	[K].RDLEIEVVLFHPNYNINGK.[K]		1.96382e-19	0.000386037	1	1	186	P00751	P00751 [546-564]		1	2270.19	19	698283	2.53477e+06	1.31444e+06	2.20106e+06	1.93794e+06	620669	1.35395e+06	1.61666e+06	1.3442e+06	3.6997e+06	2.1945e+06	870086	1.20913e+06	1.97583e+06	1.52307e+06	1.91127e+06	1.23343e+06	1.79595e+06	2.27173e+06	1.94964e+06	2.68609e+06	1.30061e+06	1.00053e+06	1.67942e+06	2.16674e+06	3.0606e+06	1.5098e+06	1.98386e+06	987191	2.65709e+06	1.11929e+06	1.03751e+06	1.15809e+06	1.78143e+06	2.04075e+06
High	RELDESLQVAER	[R].RELDESLQVAER.[L]		0.00107361	0.000386037	1	1	1	P10909	P10909 [325-336]		1	1444.74	12	1.57447e+06	1.56774e+06	2.14829e+06	1.26573e+06	1.19919e+06	1.2144e+06	1.55311e+06	1.23835e+06	1.95084e+06	1.16949e+06	1.53063e+06	1.02497e+06	1.19308e+06	1.66543e+06	1.42468e+06	1.13607e+06	1.61469e+06	1.04019e+06	1.33395e+06	1.43818e+06	1.43686e+06	1.24897e+06	1.43791e+06	1.15874e+06	1.13654e+06	1.36279e+06	1.31228e+06	1.42345e+06	816407	1.17709e+06	1.17766e+06	1.69865e+06	1.59221e+06	1.37798e+06	1.15126e+06
High	RHPDYSVVLLLR	[R].RHPDYSVVLLLR.[L]		1.109e-09	0.000386037	1	1	620	P02768	P02768 [361-372]		1	1467.84	12	1.24896e+07	2.40763e+07	3.0477e+07	1.75549e+07	6.92612e+07	4.8375e+07	4.26133e+07	9.14298e+07	7.56014e+07	8.59832e+07	8.76056e+07	1.64145e+07	3.39365e+07	2.59225e+07	2.1184e+07	5.98787e+07	6.28555e+07	6.19843e+07	8.67002e+07	5.0134e+07	6.36431e+07	8.52704e+06	1.81638e+07	1.76824e+07	4.10901e+07	4.25053e+07	7.80394e+07	9.79454e+07	3.68114e+07	8.16464e+07	3.56041e+07	1.32741e+08	1.33478e+08	1.37119e+07	1.40413e+07
High	RHPYFYAPELLFFAK	[R].RHPYFYAPELLFFAK.[R]		1.34168e-11	0.000386037	1	1	832	P02768	P02768 [169-183]		1	1899	15	412024	1.39192e+06	826106	879360	1.6382e+06	1.31551e+06	1.56645e+06	3.32411e+06	2.17658e+06	2.72099e+06	2.02776e+06	810820	2.08974e+06	944282	1.12312e+06	1.52641e+06	1.63279e+06	4.08252e+06	3.35364e+06	1.83251e+06	3.49491e+06	424318	1.2834e+06	710880	1.97556e+06	3.03618e+06	3.97405e+06	3.62414e+06	1.62786e+06	3.80686e+06	1.32184e+06	4.57209e+06	5.18469e+06	1.12435e+06	793286
High	QVTQSYWDTNPTR	[K].QVTQSYWDTNPTR.[A]		0.000154211	0.000386037	1	1	5	P07996	P07996 [1042-1054]		0	1595.74	13
High	MYLGYEYVTAIR	[K].MYLGYEYVTAIR.[N]	1xOxidation [M1]	1.38832e-09	0.000386037	1	1	2905	P02787	P02787 [332-343]		0	1494.73	12	3.02927e+08	3.3695e+08	4.53681e+08	2.75314e+08	4.04095e+08	2.94439e+08	3.75579e+08	3.7515e+08	3.31818e+08	3.31804e+08	4.05566e+08	3.70201e+08	3.54486e+08	3.39918e+08	3.24002e+08	3.55927e+08	3.53955e+08	3.20805e+08	3.39652e+08	3.81336e+08	2.75708e+08	2.41687e+08	3.94456e+08	3.50245e+08	3.37596e+08	2.7636e+08	3.81129e+08	2.96324e+08	4.35972e+08	3.94429e+08	4.13067e+08	3.21019e+08	3.8827e+08	3.52617e+08	3.44589e+08
High	MYLGYEYVTAIR	[K].MYLGYEYVTAIR.[N]		7.82139e-09	0.000386037	1	1	1040	P02787	P02787 [332-343]		0	1478.73	12	4.58517e+07	6.99809e+07	5.34396e+07	5.53693e+07	7.81859e+07	8.90022e+07	6.69689e+07	9.82513e+07	6.50968e+07	8.82611e+07	8.5547e+07	6.3313e+07	9.76068e+07	7.84596e+07	6.87695e+07	6.30829e+07	5.91457e+07	7.27917e+07	5.51871e+07	1.08097e+08	7.14669e+07	7.17674e+07	9.26365e+07	8.15997e+07	7.46293e+07	4.70144e+07	7.35205e+07	6.9738e+07	5.2475e+07	1.05476e+08	6.7706e+07	7.41706e+07	8.21252e+07	9.40458e+07	7.29616e+07
High	MYEVVYQIGTETR	[K].MYEVVYQIGTETR.[S]	1xOxidation [M1]	7.43008e-06	0.000386037	1	1	6	Q9UHG3	Q9UHG3 [292-304]		0	1604.76	13			159144
High	LPGIVAEGRDDLYVSDAFHK	[K].LPGIVAEGRDDLYVSDAFHK.[A]		4.16588e-15	0.000386037	1	1	667	P01008	P01008 [383-402]		1	2202.12	20	2.46192e+07	3.08179e+07	3.09305e+07	3.24425e+07	3.2564e+07	2.99177e+07	3.24174e+07	2.56878e+07	3.10483e+07	2.531e+07	3.09022e+07	2.36241e+07	2.97729e+07	3.0574e+07	3.02043e+07	3.4284e+07	2.68099e+07	2.14878e+07	2.80768e+07	3.18774e+07	2.76603e+07	2.18151e+07	3.76884e+07	3.37848e+07	2.9348e+07	2.97188e+07	2.70602e+07	3.17808e+07	2.44025e+07	2.89621e+07	2.26733e+07	2.41893e+07	3.53566e+07	2.2137e+07	3.53751e+07
High	IPIEDGSGEVVLSR	[R].IPIEDGSGEVVLSR.[K]		7.09377e-13	0.000386037	1	1	1315	P01024	P01024 [291-304]		0	1470.78	14	9.0722e+07	8.59129e+07	1.04414e+08	7.66517e+07	7.94039e+07	7.056e+07	7.31814e+07	6.87566e+07	7.71627e+07	6.87969e+07	9.80306e+07	1.11662e+08	9.1472e+07	1.13097e+08	1.00141e+08	1.00136e+08	9.99774e+07	9.8063e+07	8.24815e+07	5.93266e+07	9.74892e+07	1.14022e+08	6.52784e+07	8.96057e+07	1.11128e+08	8.51627e+07	7.57727e+07	9.58783e+07	8.90574e+07	8.90562e+07	8.91488e+07	8.17748e+07	9.69777e+07	6.84986e+07	6.84619e+07
High	IPIEDGSGEVVLSRK	[R].IPIEDGSGEVVLSRK.[V]		2.21874e-13	0.000386037	1	1	70	P01024	P01024 [291-305]		1	1598.87	15	709132	245762	729801	1.02444e+06	1.05367e+06	635937	687701		767637	900420	768398	838242	502334	820329	716988	1.07235e+06	1.12921e+06	1.01196e+06	852235	615969	1.01871e+06	988565	215347	805232	842754	930172	1.05584e+06	1.13749e+06	1.33013e+06	868603	1.00973e+06	950609	1.57104e+06	872177	577289
High	LPLEYSYGEYR	[R].LPLEYSYGEYR.[D]		8.49339e-07	0.000386037	1	1	157	P07358	P07358 [324-334]		0	1389.67	11	2.932e+06	2.14353e+06	2.13475e+06	3.558e+06	3.47725e+06	2.63421e+06	2.93994e+06	2.30745e+06	3.0346e+06	2.01787e+06	3.75499e+06	3.53267e+06	2.79867e+06	2.83349e+06	2.4864e+06	3.61353e+06	3.15973e+06	2.85647e+06	3.03131e+06	2.2907e+06	2.43131e+06	3.26422e+06	2.72824e+06	3.41049e+06	3.29971e+06	2.86702e+06	2.37146e+06	2.37433e+06	2.90205e+06	3.44288e+06	2.41061e+06	2.20245e+06	3.04061e+06	3.07214e+06	2.83111e+06
High	LPNNVLQEK	[K].LPNNVLQEK.[I]		0.000939787	0.000386037	1	1	268	P43652	P43652 [89-97]		0	1054.59	9
High	LPPNVVEESAR	[K].LPPNVVEESAR.[A]		0.000143659	0.000386037	1	1	1612	P01023	P01023 [935-945]		0	1210.64	11	2.87916e+08	2.61429e+08	2.61612e+08	1.13002e+08	1.1324e+08	8.20823e+07	1.22102e+08	1.40642e+08	1.44728e+08	7.34956e+07	1.36795e+08	8.85738e+07	7.96892e+07	7.68807e+07	8.122e+07	8.69976e+07	1.14543e+08	1.14241e+08	7.14125e+07	2.12454e+08	6.31599e+07	7.58235e+07	1.23944e+08	9.67268e+07	8.28619e+07	6.98723e+07	1.5892e+08	8.09171e+07	1.29034e+08	8.34533e+07	2.89479e+08	9.84475e+07	8.45207e+07	1.17444e+08	9.86909e+07
High	IPQPLFFINSEYFQYPANIIK	[R].IPQPLFFINSEYFQYPANIIK.[M]		0.000677414	0.000386037	1	1	23	Q13093	Q13093 [310-330]		0	2542.34	21				48971.1		141854				170089			177645		161783						104149	118050	125677				108101
High	LPQQANDYLNSFNWER	[K].LPQQANDYLNSFNWER.[Q]		4.28975e-15	0.000386037	1	1	406	P04114	P04114 [2118-2133]		0	1994.94	16	9.92717e+06	1.71056e+07	1.18062e+07	1.80442e+07	1.92693e+07	2.11466e+07	1.22309e+07	3.08416e+07	2.1109e+07	1.93797e+07	1.40767e+07	1.50854e+07	2.39935e+07	2.41485e+07	2.60113e+07	1.86338e+07	1.48967e+07	1.26151e+07	2.224e+07	1.95606e+07	1.81625e+07	2.30008e+07	1.36641e+07	1.51647e+07	1.36807e+07	2.47043e+07	1.7548e+07	1.81867e+07	1.54987e+07	1.42428e+07	1.57867e+07	2.66194e+07	1.01346e+07	2.91e+07	1.75851e+07
High	LPSGLPVSLLTLYLDNNK	[R].LPSGLPVSLLTLYLDNNK.[I]		2.89522e-08	0.000386037	1	1	115	P51884	P51884 [199-216]		0	1957.1	18	445703	880239	248499	590546	574077	643702	1.04788e+06	436193	625882	790662	845808	270236	872392	681731	300238	1.03991e+06	637834	1.203e+06	1.4132e+06	550711	979860	787000	742538	727182	801166	855403	1.15734e+06	717299	378364	632769	762786	1.17009e+06	752877	850527	991502
High	IPSVQINFK	[R].IPSVQINFK.[D]		0.00101295	0.000386037	1	1	237	P04114	P04114 [2626-2634]		0	1045.6	9	2.18093e+07	3.31699e+07	2.88579e+07	4.02695e+07	3.19037e+07	3.74402e+07	2.42506e+07	4.54861e+07	3.78427e+07	3.03241e+07	2.71746e+07	2.89145e+07	4.8269e+07	4.29922e+07	5.11589e+07	3.85183e+07	3.26422e+07	3.03043e+07	4.24702e+07	3.24481e+07	3.68648e+07	4.68131e+07	3.22506e+07	3.1572e+07	2.75531e+07	3.25051e+07	3.28818e+07	4.35836e+07	3.47307e+07	2.57291e+07	3.29302e+07	3.8854e+07	2.64562e+07	4.15879e+07	3.56582e+07
High	LPTDSELAPR	[K].LPTDSELAPR.[S]		0.000557442	0.000386037	1	1	158	P49908	P49908 [289-298]		0	1098.58	10	4.58995e+06	3.21402e+06	4.76444e+06	2.32548e+06	2.32364e+06	2.74138e+06	2.59478e+06	1.92742e+06	2.51076e+06	2.0162e+06	2.33614e+06	1.80793e+06	2.36639e+06	2.89048e+06	3.81654e+06	2.07391e+06	2.6945e+06	2.11158e+06	2.23504e+06	2.96595e+06	2.17499e+06	2.41105e+06	2.62111e+06	2.29071e+06	2.57995e+06	1.99046e+06	3.24481e+06	2.38279e+06	2.57246e+06	2.53631e+06	2.0747e+06	2.85079e+06	2.513e+06	2.45262e+06	2.08857e+06
High	IPTTFENGR	[K].IPTTFENGR.[C]		0.00745126	0.000386037	1	1	186	P05090	P05090 [52-60]		0	1034.53	9	1.65202e+07	1.19685e+07	1.55764e+07	1.17702e+07	2.24739e+07	1.80198e+07	1.54132e+07	2.06917e+07	1.31056e+07	1.19176e+07	8.8606e+06	1.41584e+07	1.19978e+07	1.22774e+07	1.72636e+07	1.4209e+07	1.19137e+07	9.55602e+06	1.07937e+07	1.36225e+07	1.07998e+07	7.10954e+06	1.42091e+07	1.32603e+07	1.03202e+07	1.20784e+07	1.19188e+07	8.21839e+06	1.30033e+07	1.46068e+07	1.98775e+07	1.25704e+07	1.03826e+07	1.19422e+07	1.16513e+07
High	LPVVLANGQIR	[K].LPVVLANGQIR.[A]		0.00201725	0.000386037	1	1	16	Q9Y6R7	Q9Y6R7 [1338-1348]; [2539-2549]; [3740-3750]		0	1179.72	11	226149	343404	327072	204916	773637	365909	401758	299491	983608	608424	348697		462826	520701	358592	421152	538150	270445	282118	492454	1.09092e+06	577378		400274	469525	378570	314541	371898	413370	285876	600891		428680		411161
High	LPYTIITTPPLK	[R].LPYTIITTPPLK.[D]		4.03554e-08	0.000386037	1	1	370	P04114	P04114 [3137-3148]		0	1356.81	12	2.24651e+07	3.36984e+07	3.65518e+07	3.67269e+07	2.81673e+07	4.00548e+07	2.37302e+07	5.16412e+07	3.43593e+07	2.95908e+07	2.40939e+07	2.64964e+07	4.45645e+07	3.13443e+07	5.55432e+07	3.9013e+07	2.78405e+07	2.57565e+07	3.86418e+07	3.60256e+07	3.0899e+07	4.63676e+07	2.76997e+07	2.63988e+07	2.2915e+07	2.8638e+07	3.50658e+07	3.7151e+07	3.72837e+07	2.30447e+07	2.9178e+07	3.60115e+07	2.20926e+07	4.36564e+07	3.19824e+07
High	LQAEAFQAR	[R].LQAEAFQAR.[L]		0.00553547	0.000386037	1	1	154	P02649	P02649 [270-278]		0	1033.54	9	2.82357e+07	1.59688e+07	2.13267e+07	2.21713e+07	1.24993e+07	1.7976e+07	1.62015e+07	1.80573e+07	2.22629e+07	1.23293e+07	1.17908e+07	1.57495e+07	1.49182e+07	1.23488e+07	2.01161e+07	1.63142e+07	1.43125e+07	1.37609e+07	1.82722e+07	1.30668e+07	4.54402e+07	1.43254e+07	1.21343e+07	2.37736e+07	1.18651e+07	1.62109e+07	1.24828e+07	1.28137e+07	1.21895e+07	9.03795e+06	1.91283e+07	1.08464e+07	9.31114e+06	1.37997e+07	1.42945e+07
High	LQAILGVPWK	[R].LQAILGVPWK.[D]		0.000168466	0.000386037	1	1	222	P01019	P01019 [158-167]		0	1124.68	10	4.14263e+06	3.74731e+06	1.07539e+07	4.11291e+06	3.63773e+06	3.08907e+06	3.65913e+06	3.16757e+06	5.33668e+06	4.18252e+06	3.45348e+06	3.77049e+06	4.85365e+06	3.72887e+06	5.2718e+06	4.23232e+06	3.40965e+06	3.22552e+06	4.23067e+06	8.61505e+06	4.15408e+06	3.80848e+06	3.60021e+06	3.92413e+06	9.74088e+06	4.2587e+06	2.69575e+06	3.04764e+06	7.10603e+06	1.01169e+07	3.90182e+06	3.20705e+06	2.5855e+06	3.52782e+06	2.77619e+06
High	LQAVTDDHIR	[R].LQAVTDDHIR.[M]		0.00166024	0.000386037	1	1	7	P30043	P30043 [125-134]		0	1167.61	10																	80626.4			751181									808832
High	LPGIVAEGR	[K].LPGIVAEGR.[D]		0.00057672	0.000386037	1	1	191	P01008	P01008 [383-391]		0	911.531	9	7.57847e+06	7.13045e+06	9.25537e+06	7.6435e+06	8.41207e+06	7.19744e+06	8.05263e+06	5.91198e+06	8.49267e+06	6.06098e+06	8.07935e+06	7.44401e+06	6.38169e+06	7.97952e+06	8.35695e+06	7.90439e+06	7.28334e+06	5.53217e+06	7.33637e+06	7.47998e+06	5.53522e+06	5.94162e+06	7.90317e+06	8.72355e+06	6.33395e+06	6.31813e+06	5.33424e+06	5.56058e+06	7.24511e+06	6.04734e+06	6.27995e+06	6.74958e+06	7.48233e+06	5.77337e+06	6.25192e+06
High	IPGIFELGISSQSDR	[K].IPGIFELGISSQSDR.[G]		7.11107e-12	0.000386037	1	1	122	P07358	P07358 [260-274]		0	1618.84	15	4.15798e+06	3.83492e+06	3.54795e+06	5.40853e+06	4.05664e+06	2.44966e+06	3.55703e+06	2.62196e+06	3.11504e+06	3.09663e+06	4.13541e+06	2.6681e+06	3.1717e+06	3.00201e+06	1.73019e+06	4.05215e+06	4.18305e+06	3.50757e+06	3.7003e+06	2.99934e+06	3.04899e+06	3.48486e+06	1.22026e+06	3.64119e+06	4.03149e+06	3.95062e+06	2.70934e+06	3.48184e+06	2.121e+06	4.1869e+06	2.49105e+06	2.21883e+06	3.24796e+06	2.83429e+06	3.19472e+06
High	LPEGSVSLIILLTDGDPTVGETNPR	[R].LPEGSVSLIILLTDGDPTVGETNPR.[S]		2.02221e-19	0.000386037	1	1	224	Q14624	Q14624 [372-396]		0	2593.37	25	1.07212e+06	2.0984e+06	2.48463e+06	3.60467e+06	2.15743e+06	3.07706e+06	1.68389e+06	1.88733e+06	1.04843e+06	2.43101e+06	1.73894e+06	571139	746971	1.11315e+06	1.54039e+06	1.12118e+06	1.33777e+06	804845	2.74152e+06	1.34159e+06	1.40939e+06	1.43639e+06	669295	1.64617e+06	2.07259e+06	3.56743e+06	1.63243e+06	1.19772e+06	220617	1.42033e+06	701755	425678	365428	1.59206e+06	4.93269e+06
High	LNTDIAGLASAIDMSTNYNSDSLHFSNVFR	[R].LNTDIAGLASAIDMSTNYNSDSLHFSNVFR.[S]	1xOxidation [M14]	2.08747e-22	0.000386037	1	1	191	P04114	P04114 [1868-1897]		0	3289.54	30	2.49751e+06	6.88844e+06	5.83146e+06	6.78433e+06	5.49321e+06	6.9573e+06	5.28484e+06	7.16101e+06	5.47835e+06	5.73487e+06	3.66524e+06	2.02812e+06	7.82916e+06	6.52205e+06	8.76597e+06	8.41961e+06	5.27318e+06	6.39654e+06	8.33684e+06	4.44248e+06	5.6201e+06	6.79481e+06	4.9471e+06	4.05325e+06	5.37371e+06	6.93971e+06	8.19467e+06	7.43606e+06	5.0732e+06	3.81857e+06	5.11952e+06	4.83891e+06	3.64725e+06	7.18358e+06	7.73713e+06
High	LNAENNATFYFK	[K].LNAENNATFYFK.[I]		3.64578e-05	0.000386037	1	1	1	P01042	P01042 [289-300]		0	1431.69	12											180234		80521.3			198949				273670	345099				199234					194573	226189
High	LNDLEDALQQAK	[K].LNDLEDALQQAK.[E]		9.30204e-10	0.000386037	1	1	192	P04264	P04264 [444-455]		0	1357.7	12	4.73364e+06	5.24307e+06	5.87237e+06	4.12616e+06	2.58065e+07	1.52344e+07	5.1751e+06	1.91805e+06	6.27862e+06	2.22695e+07	2.17451e+07	9.30776e+06	2.0314e+06	6.29318e+06	4.53724e+06	3.00736e+06	3.71514e+06	5.3608e+06	4.30058e+06	4.85222e+06	4.57365e+06	5.26347e+06	4.69021e+06	3.48399e+06	1.05443e+06	3.23791e+06	2.61881e+06	2.16824e+06	2.81335e+06	1.9196e+06	3.89282e+06	1.39971e+06	3.96046e+06	1.31318e+06	3.03856e+06
High	LNDLNSVLVMPTFHVPFTDLQVPSCK	[K].LNDLNSVLVMPTFHVPFTDLQVPSCK.[L]	1xCarbamidomethyl [C25]	3.75968e-09	0.000386037	1	1	139	P04114	P04114 [3737-3762]		0	2971.51	26	887442	1.4042e+06	1.2763e+06	1.54917e+06	748277	2.01781e+06	1.37012e+06	2.40317e+06	1.46767e+06	1.59146e+06	1.45674e+06	993097	2.09934e+06	2.72169e+06	2.81977e+06	638343	1.32251e+06	1.75098e+06	1.30181e+06	2.28429e+06	1.08867e+06	1.52249e+06	1.65867e+06	1.32333e+06	467800	1.29462e+06	958567	1.9393e+06	901387	450844	1.14268e+06	634037	880774	2.07161e+06	2.13139e+06
High	LNDLNSVLVMPTFHVPFTDLQVPSCK	[K].LNDLNSVLVMPTFHVPFTDLQVPSCK.[L]	1xCarbamidomethyl [C25]; 1xOxidation [M10]	4.43876e-09	0.000386037	1	1	16	P04114	P04114 [3737-3762]		0	2987.5	26
High	LNEAAAGLNQAATELVQASR	[R].LNEAAAGLNQAATELVQASR.[G]		0.000141133	0.000386037	1	1	11	Q9Y490	Q9Y490 [1242-1261]		0	2027.05	20	767499	403154	813473	120779	475876			123461		174443		273621				160799	172868	254183				294501		191574	104525			298434					229431		251088
High	INENTGSVSVTR	[R].INENTGSVSVTR.[T]		0.00670111	0.000386037	1	1	4	P55290	P55290 [190-201]		0	1276.65	12	179758	202239	192706	131246	89748.6	138408	251498	146636	100338	80942.7	96728.8	108826	132411	99159.8	119997	87631.6	107606	126445	92314	169853	76290.4	49826	258421	96936	94612.2	115241		62000.5		77367.7		166633	128857		85197.1
High	LNGEIQALELPQK	[R].LNGEIQALELPQK.[A]		8.27326e-10	0.000386037	1	1	564	P04114	P04114 [2450-2462]		0	1452.81	13	2.71471e+07	3.23647e+07	3.06161e+07	3.77321e+07	3.0421e+07	4.33183e+07	2.47862e+07	4.42338e+07	3.91662e+07	2.70656e+07	2.75993e+07	3.48031e+07	5.39687e+07	4.19011e+07	5.07456e+07	4.28753e+07	3.40795e+07	2.82279e+07	3.95088e+07	3.29583e+07	3.39225e+07	5.14283e+07	3.34717e+07	3.33681e+07	3.05964e+07	3.24414e+07	3.58786e+07	4.27497e+07	4.09546e+07	2.61967e+07	3.39379e+07	4.37645e+07	2.44867e+07	4.54827e+07	3.71413e+07
High	INHGILYDEEK	[K].INHGILYDEEK.[Y]		1.13404e-05	0.000386037	1	2	272	Q03591	Q03591 [28-38]		0	1330.66	11	9.17634e+06	2.18052e+07	1.70808e+07	1.55663e+07	2.3214e+07	1.88723e+07	1.96679e+07	2.60074e+07	1.51797e+07	1.27768e+07	2.09414e+07	1.65644e+07	2.39685e+07	2.13733e+07	2.79231e+07	2.88574e+07	2.51966e+07	2.22531e+07	1.64193e+07	1.95083e+07	1.71596e+07	2.97118e+07	2.20194e+07	3.10149e+07	2.91589e+07	2.2326e+07	6.64048e+06	2.31327e+07	2.19869e+07	1.77465e+07	1.34301e+07	2.33685e+07	1.88146e+07	2.22956e+07	2.92057e+07
High	LQDFSDQLSDYYEK	[K].LQDFSDQLSDYYEK.[F]		7.55863e-11	0.000386037	1	1	415	P04114	P04114 [4499-4512]		0	1750.78	14	2.09807e+07	2.55137e+07	2.42537e+07	2.78716e+07	2.4392e+07	2.91412e+07	1.97375e+07	3.74506e+07	3.00481e+07	2.25495e+07	1.67913e+07	2.39405e+07	3.24747e+07	2.70741e+07	4.22851e+07	2.99111e+07	2.50878e+07	1.98574e+07	3.06702e+07	2.65449e+07	2.0934e+07	3.22984e+07	2.69353e+07	2.08099e+07	1.87431e+07	2.21074e+07	2.70983e+07	3.0966e+07	3.11321e+07	1.76256e+07	2.19285e+07	2.56397e+07	1.74131e+07	3.77401e+07	2.75031e+07
High	LNHQLEGLTFQMK	[K].LNHQLEGLTFQMK.[K]		1.74198e-05	0.000386037	1	1	198	P06727	P06727 [234-246]		0	1558.8	13	3.20462e+06	4.20225e+06	1.76842e+06	3.11273e+06	7.78066e+06	4.56448e+06	4.86315e+06	5.70412e+06	4.80074e+06	7.05991e+06	3.49191e+06	7.14515e+06	5.55607e+06	5.8847e+06	4.74394e+06	4.32888e+06	3.37418e+06	4.86102e+06	3.67266e+06	7.16907e+06	5.8609e+06	5.38785e+06	5.7254e+06	5.83023e+06	8.81568e+06	2.76669e+06	2.98785e+06	6.10843e+06	3.98912e+06	3.06388e+06	2.55988e+06	8.83641e+06	5.99467e+06	6.08898e+06	5.30796e+06
High	LNILNNNYK	[K].LNILNNNYK.[I]		0.000478125	0.000386037	1	1	118	O14791	O14791 [382-390]		0	1105.6	9	6.34072e+06	7.23188e+06	7.88314e+06	5.23358e+06	5.40695e+06	7.72177e+06	3.76311e+06	5.30914e+06	3.69288e+06	5.43392e+06	3.46298e+06	4.86192e+06	7.83196e+06	6.17846e+06	3.31455e+06	7.28884e+06	5.92265e+06	5.63136e+06	4.96947e+06	4.37704e+06	6.38429e+06	7.24795e+06	6.22514e+06	3.29452e+06	5.96846e+06	7.07769e+06	4.86979e+06	6.29149e+06	7.68181e+06	7.88797e+06	6.64247e+06	5.34624e+06	6.91447e+06	6.26663e+06	5.0917e+06
High	LNMGITDLQGLR	[K].LNMGITDLQGLR.[L]		4.41559e-06	0.000386037	2	2	162	P0C0L4; P0C0L5	P0C0L4 [326-337]; P0C0L5 [326-337]		0	1330.71	12	1.18478e+07	7.3557e+06	7.30617e+06	1.45873e+07	7.77829e+06	1.15914e+07	6.39376e+06	1.49374e+07	1.05044e+07	1.29834e+07	9.26772e+06	9.96739e+06	8.87938e+06	1.11208e+07	8.89608e+06	6.33655e+06	8.80558e+06	1.35372e+07	6.95054e+06	8.49132e+06	1.16766e+07	1.66841e+07	2.03709e+06	9.5954e+06	1.55734e+07	4.04419e+06	8.89666e+06	1.22264e+07	5.99616e+06	7.67345e+06	6.14803e+06	1.02963e+07	1.10041e+07	1.2271e+07	8.05092e+06
High	LNMGITDLQGLR	[K].LNMGITDLQGLR.[L]	1xOxidation [M3]	6.32442e-08	0.000386037	2	2	555	P0C0L4; P0C0L5	P0C0L4 [326-337]; P0C0L5 [326-337]		0	1346.71	12	6.53442e+07	4.5762e+07	5.52322e+07	8.09256e+07	3.99064e+07	4.70863e+07	3.1651e+07	5.26711e+07	5.34044e+07	5.47107e+07	5.23629e+07	6.84666e+07	5.46431e+07	6.16049e+07	4.1296e+07	4.63674e+07	7.48056e+07	8.1333e+07	4.68921e+07	1.81627e+07	6.38616e+07	4.30187e+07	1.1366e+07	4.97306e+07	9.51481e+07	1.75213e+07	4.4807e+07	3.46805e+07	5.2394e+07	4.81265e+07	4.29321e+07	5.79124e+07	5.41847e+07	4.54777e+07	3.56743e+07
High	LNNGEITQHR	[K].LNNGEITQHR.[K]		1.41564e-06	0.000386037	1	1	591	P04003	P04003 [370-379]		0	1181.6	10	2.45499e+07	1.07459e+07	1.69612e+07	2.51579e+07	1.65523e+07	1.80564e+07	1.48411e+07	1.48834e+07	1.36045e+07	1.23506e+07	1.52968e+07	1.66504e+07	1.54252e+07	1.60245e+07	1.83296e+07	1.44949e+07	1.42821e+07	1.21403e+07	1.98971e+07	1.51245e+07	2.22564e+07	1.6456e+07	1.1163e+07	1.29847e+07	1.18648e+07	2.14559e+07	1.08876e+07	1.23635e+07	1.09441e+07	1.21586e+07	1.1258e+07	1.52216e+07	1.39805e+07	9.64007e+06	1.47893e+07
High	LNNGEITQHRK	[K].LNNGEITQHRK.[S]		0.00273646	0.000386037	1	1	5	P04003	P04003 [370-380]		1	1309.7	11	54864.1	35958.8	44247.5	78576.5	52906.1	71181	99207.6	82489.1	76100.2	106417	97193.7	93083.2	111461	60870.5	88319.9	95893.6	68969.2	97466.9	305719	81287.4	159200	56571.9	41195.6	30648.1	59113	172980	48978.6	130788	50884.1	79935.1	47673.9	269560	267555	85625.8	44238
High	INNQLTLDSNTK	[K].INNQLTLDSNTK.[Y]		8.51927e-10	0.000386037	1	1	201	P04114	P04114 [2877-2888]		0	1360.71	12	1.23758e+07	1.80067e+07	1.92555e+07	1.32227e+07	1.59764e+07	1.58243e+07	9.52739e+06	1.78235e+07	1.80505e+07	1.45611e+07	1.00244e+07	8.2876e+06	1.53791e+07	1.78376e+07	1.6705e+07	1.15023e+07	1.17817e+07	1.32113e+07	1.34892e+07	1.34859e+07	1.14527e+07	1.72726e+07	9.6337e+06	9.49723e+06	8.04999e+06	1.13853e+07	1.52289e+07	1.78691e+07	1.50171e+07	6.7039e+06	1.53252e+07	1.3621e+07	9.45583e+06	1.26318e+07	1.12594e+07
High	YYWGGQYTWDMAK	[R].YYWGGQYTWDMAK.[H]		1.70854e-08	0.000386037	1	1	469	P02675	P02675 [446-458]		0	1668.72	13	2.18402e+07	1.13217e+07	1.05295e+07	2.33832e+07	1.4941e+07	1.67071e+07	2.0891e+07	2.68638e+07	2.64562e+07	2.59614e+07	2.5201e+07	1.95947e+07	1.77548e+07	1.57593e+07	1.46878e+07	1.58211e+07	1.73489e+07	1.78329e+07	1.54644e+07	2.83885e+07	2.49149e+07	3.33324e+07	1.63012e+07	2.55714e+07	1.84036e+07	1.86628e+07	2.00993e+07	2.12143e+07	1.44492e+07	1.51036e+07	1.22256e+07	2.36821e+07	2.39256e+07	1.82634e+07	1.9507e+07
High	LNTDIAGLASAIDMSTNYNSDSLHFSNVFR	[R].LNTDIAGLASAIDMSTNYNSDSLHFSNVFR.[S]		4.39606e-25	0.000386037	1	1	105	P04114	P04114 [1868-1897]		0	3273.55	30	632561	3.21419e+06	1.36937e+06	2.61655e+06	2.13319e+06			3.89955e+06	2.64165e+06	3.32057e+06	1.40582e+06	878306	2.73559e+06	3.23917e+06	3.09211e+06	1.93173e+06	1.49219e+06	1.93285e+06		3.14201e+06	2.91634e+06	3.3624e+06		1.23454e+06	688169	1.88532e+06	1.47121e+06	3.86755e+06	242631	642442	865979	2.08266e+06	1.18814e+06	4.1922e+06	4.23799e+06
High	LNHQLEGLTFQMK	[K].LNHQLEGLTFQMK.[K]	1xOxidation [M12]	2.66525e-06	0.000386037	1	1	470	P06727	P06727 [234-246]		0	1574.8	13	3.15233e+07	4.37614e+07	3.01265e+07	2.33905e+07	4.84752e+07	2.98863e+07	3.12254e+07	3.56385e+07	3.34418e+07	3.98357e+07	2.50046e+07	4.64884e+07	3.3386e+07	3.63291e+07	2.41273e+07	3.40394e+07	2.82575e+07	3.07651e+07	2.64869e+07	2.42745e+07	3.36273e+07	2.56092e+07	3.4003e+07	3.1889e+07	5.29734e+07	2.39064e+07	1.75006e+07	3.31407e+07	4.14554e+07	2.03903e+07	2.25906e+07	4.36808e+07	3.61297e+07	3.35065e+07	3.4177e+07
High	LMVELHNLYR	[R].LMVELHNLYR.[A]	1xOxidation [M2]	3.00637e-05	0.000386037	1	1	61	Q6UXB8	Q6UXB8 [35-44]		0	1303.68	10	112168	250423	176179	163001	163387	202179	222920	128459	172432	342001		194018	329049	198656		177201	217005	197128	458610		279824	230454	384958	272795	286515		188860	179765	177776	153734	121094	162577	150387		213501
High	LQDRGPDVLTATVSGK	[K].LQDRGPDVLTATVSGK.[L]		1.72531e-08	0.000386037	1	1	232	Q14624	Q14624 [497-512]		1	1656.89	16	3.8398e+06	2.76948e+06	3.10351e+06	4.11661e+06	3.35241e+06	2.75572e+06	3.8686e+06	3.19761e+06	3.01635e+06	2.70176e+06	3.76907e+06	4.37422e+06	2.97793e+06	3.17885e+06	2.23967e+06	3.94896e+06	4.9061e+06	3.99946e+06	3.72039e+06	3.21331e+06	3.5152e+06	4.17163e+06	3.74412e+06	4.26129e+06	5.18362e+06	5.68714e+06	4.63276e+06	5.86063e+06	5.1332e+06	6.26532e+06	4.88037e+06	4.81278e+06	5.40252e+06	5.78124e+06	4.26191e+06
High	LQETSNWLLSQQQADGSFQDLSPVIHR	[K].LQETSNWLLSQQQADGSFQDLSPVIHR.[S]		1.52344e-23	0.000386037	1	1	395	P0C0L5	P0C0L5 [1100-1126]		0	3097.53	27	3.30162e+07	1.37415e+07	2.93552e+07	2.95321e+07	275057	2.68914e+07	2.36978e+07	3.77758e+07	3.03266e+07	2.5734e+07	1.40456e+07	1.19286e+07	3.01274e+07	1.13842e+07	2.41536e+07	1.40677e+07	2.47986e+07	3.14876e+07	5.30193e+07	1.8135e+07	3.242e+07	2.01126e+07	4.39052e+06	2.43374e+07	5.53868e+07	1.13077e+07	2.83685e+07	2.96394e+07	1.53841e+07	3.61006e+07	2.63811e+07	2.98837e+07	2.03815e+07	4.86926e+07	2.75333e+07
High	ISEGLPALEFPNEK	[K].ISEGLPALEFPNEK.[-]		0.000110981	0.000386037	1	1	16	P02748	P02748 [546-559]		0	1543.8	14	260725	364323	453562								294664						214221		330591			339434			274309					100573
High	ISEITNIVSK	[R].ISEITNIVSK.[L]		2.19667e-05	0.000386037	1	1	89	P20742	P20742 [336-345]		0	1103.63	10	3.74496e+06		2.23649e+07	2.35037e+06		646826				1.09362e+06	1.69077e+06	3.42382e+06	714482		419046	1.93936e+06	5.82215e+06	1.95647e+06	488500	1.3592e+07	728694	4.69483e+06		2.30912e+06	7.69957e+06	5.10827e+06	484597		2.17998e+07	6.02766e+06			663134	832732	5.05208e+06
High	LSFYYLIMAK	[K].LSFYYLIMAK.[G]		2.30069e-05	0.000386037	1	1	180	P01023	P01023 [493-502]		0	1248.67	10	4.37332e+06	4.95225e+06	1.78787e+06	6.10221e+06	6.56251e+06	4.52766e+06	3.8727e+06	5.5221e+06	5.9221e+06	6.03495e+06	8.35769e+06	1.80152e+06	3.30446e+06	2.85677e+06	3.05189e+06	3.22021e+06	2.91311e+06	5.69964e+06	3.33293e+06	5.10249e+06	4.30029e+06	3.42966e+06	4.35646e+06	5.95914e+06	4.71191e+06	5.20751e+06	4.95453e+06	4.5654e+06	3.53839e+06	3.53593e+06	5.35069e+06	4.92022e+06	2.75478e+06	5.61914e+06	4.94311e+06
High	LSFYYLIMAK	[K].LSFYYLIMAK.[G]	1xOxidation [M8]	6.58932e-05	0.000386037	1	1	526	P01023	P01023 [493-502]		0	1264.66	10	1.1907e+07	1.51071e+07	1.05939e+07	1.24471e+07	9.87982e+06	1.35714e+07	9.88441e+06	7.08436e+06	1.31257e+07	1.12209e+07	1.86237e+07	6.71265e+06	1.00103e+07	8.91109e+06	8.42339e+06	1.22948e+07	1.24118e+07	1.41967e+07	1.01375e+07	1.2351e+07	9.18064e+06	8.24979e+06	1.21375e+07	8.56363e+06	1.28331e+07	1.22991e+07	1.30477e+07	9.45624e+06	1.19239e+07	1.33772e+07	1.80267e+07	1.15784e+07	8.60478e+06	1.11388e+07	1.42285e+07
High	LSGALHVYSLGSD	[R].LSGALHVYSLGSD.[-]		0.00186038	0.000386037	1	1	80	P80108	P80108 [828-840]		0	1318.66	13		1.14907e+06		929092	1.31687e+06	1.0523e+06	1.21533e+06	1.25504e+06	1.06621e+06	1.26102e+06	1.058e+06	1.09746e+06	1.6288e+06	1.56045e+06	1.38802e+06	1.63951e+06	1.25263e+06	1.63331e+06	1.23624e+06	1.00194e+06	1.30015e+06	1.09331e+06	1.7761e+06	1.1068e+06	1.02531e+06	1.3906e+06	1.23772e+06	1.64846e+06	1.11432e+06	1.69719e+06	1.34981e+06	1.19649e+06	1.89972e+06	1.16025e+06	913572
High	ISGLIYEETR	[R].ISGLIYEETR.[G]		0.000152852	0.000386037	1	1	67	P62805	P62805 [47-56]		0	1180.62	10	7.1167e+06	4.73549e+06	8.52239e+06	3.88809e+06	3.60509e+06	4.04038e+06	4.66394e+06	3.68613e+06	5.83082e+06	2.83265e+06	3.31989e+06	3.77552e+06	3.30902e+06	1.01592e+07	3.2231e+06	2.94644e+06	9.93313e+06	8.33874e+06	1.9345e+06	2.0354e+06	1.9878e+06	1.39997e+06	7.06017e+06	7.0594e+06	1.25337e+06	1.54047e+06	3.35493e+06	7.11212e+06	6.40317e+06	4.28512e+06	9.73511e+06	2.16299e+06	2.95121e+06	2.13329e+06	2.67835e+06
High	LSGNVLSYTFQVK	[R].LSGNVLSYTFQVK.[I]		8.79397e-09	0.000386037	1	1	128	P10643	P10643 [179-191]		0	1455.78	13	2.37973e+06	3.3822e+06	1.66836e+06	3.08785e+06	3.24741e+06	2.4399e+06	2.48695e+06	2.25967e+06	2.45388e+06	3.13345e+06	2.21948e+06	2.10645e+06	1.93539e+06	2.14422e+06	1.07804e+06	1.99818e+06	3.13486e+06	2.25665e+06	2.49876e+06	1.99568e+06	2.3082e+06	1.84866e+06	3.35762e+06	2.29173e+06	1.32557e+06	2.62369e+06	2.37193e+06	1.98455e+06	1.74244e+06	2.16112e+06	3.49929e+06	2.44941e+06	2.54829e+06	2.16254e+06	2.50735e+06
High	LSLESLTSYFSIESSTK	[K].LSLESLTSYFSIESSTK.[G]		2.6452e-13	0.000386037	1	1	269	P04114	P04114 [3481-3497]		0	1891.95	17	3.19314e+06	1.19542e+07	8.48618e+06	1.12185e+07	8.51233e+06	1.25059e+07	7.41781e+06	1.31926e+07	9.15534e+06	1.09704e+07	6.66386e+06	3.27839e+06	1.3298e+07	1.35648e+07	1.49291e+07	1.01823e+07	6.87803e+06	9.47964e+06	1.05679e+07	7.90621e+06	1.06651e+07	1.1956e+07	5.84195e+06	6.34411e+06	7.18616e+06	1.04007e+07	1.20947e+07	1.37298e+07	5.17482e+06	5.50131e+06	9.15491e+06	9.65934e+06	5.47545e+06	1.32592e+07	1.22347e+07
High	LSINTHPSQKPLSITVR	[K].LSINTHPSQKPLSITVR.[T]		3.87534e-07	0.000386037	1	1	2	P01024	P01024 [409-425]		0	1891.08	17								370985	185794	318317	251354							429999			195933							1.04553e+06		252848		390806	704404
High	LSLSGGGPEFQRCSHFFQMK	[K].LSLSGGGPEFQRCSHFFQMK.[N]	1xCarbamidomethyl [C13]; 1xOxidation [M19]	0.00265056	0.000386037	1	1	605	Q13387	Q13387 [736-755]		1	2329.09	20	1.2789e+09	4.88814e+08	1.06571e+09	7.73427e+08	1.2331e+09	8.55119e+08	1.47699e+09	7.49209e+08	1.35032e+09	1.10238e+09	9.90731e+08	1.21263e+09	1.11003e+09	9.1255e+08	6.28739e+08	1.05239e+09	1.03461e+09	7.44258e+08	8.1386e+08	9.68024e+08	1.27434e+09	9.40014e+08	1.04834e+09	8.80168e+08	1.09127e+09	1.10377e+09	1.07598e+09	9.38098e+08	9.25874e+08	8.78086e+08	1.10602e+09	1.35773e+09	9.78469e+08	1.88805e+09	1.55721e+09
High	LSITGTYDLK	[K].LSITGTYDLK.[S]		3.03416e-05	0.000386037	1	1	1894	P01009	P01009 [315-324]		0	1110.6	10	4.6309e+08	4.46878e+08	5.82335e+08	4.79249e+08	3.36998e+08	2.87761e+08	3.98911e+08	3.24049e+08	3.36009e+08	3.5913e+08	4.71847e+08	3.89966e+08	4.38229e+08	5.53913e+08	3.14147e+08	4.50757e+08	5.30618e+08	5.14668e+08	3.62388e+08	3.84809e+08	3.53208e+08	3.6569e+08	5.44698e+08	4.66379e+08	4.10279e+08	3.80321e+08	3.81548e+08	4.35185e+08	4.76455e+08	5.15054e+08	5.53837e+08	4.1405e+08	5.31042e+08	3.63598e+08	5.20408e+08
High	LSITGTYDLKSVLGQLGITK	[K].LSITGTYDLKSVLGQLGITK.[V]		1.22836e-07	0.000386037	1	1	5	P01009	P01009 [315-334]		1	2107.2	20		164602	152231	149927	155761	125538	76707.3	108529	74296.4	119937	145606	41371.6	93347.2		71940				182898	60576		56344.4	119034	119842	103194		198286	145559	139711	117385		144973	118079	698900
High	LSMDIDVSYK	[R].LSMDIDVSYK.[H]		0.000193976	0.000386037	1	1	40	P01031	P01031 [1309-1318]		0	1170.57	10	405480	540294	298763	612562	485114	564925	507003	454545	462363	455798	480822	405296	632548	867939	644244		475356	654826	293550	477040	658025	775591	606205	538791	630671	405853	570142	827805	184941	669826	343079	469352	637579	489783	655398
High	LSMDIDVSYK	[R].LSMDIDVSYK.[H]	1xOxidation [M3]	3.99534e-05	0.000386037	1	1	307	P01031	P01031 [1309-1318]		0	1186.57	10	8.58199e+06	8.08776e+06	9.39538e+06	6.63585e+06	7.78734e+06	7.04094e+06	6.57905e+06	5.8821e+06	7.68208e+06	6.88201e+06	6.88856e+06	8.77386e+06	6.79262e+06	8.79997e+06	8.52394e+06	7.39955e+06	7.81376e+06	8.79045e+06	7.41529e+06	5.36584e+06	6.36985e+06	8.44988e+06	6.01588e+06	7.24955e+06	9.05704e+06	8.04198e+06	8.73151e+06	7.1199e+06	7.15729e+06	8.61793e+06	3.86169e+06	5.90714e+06	7.80646e+06	6.3454e+06	8.13124e+06
High	LSNDMMGSYAEMK	[K].LSNDMMGSYAEMK.[F]	1xOxidation [M]	3.29582e-05	0.000386037	1	1	40	P04114	P04114 [1738-1750]		0	1492.61	13	161827	356451	261908	383939	473597	1.55004e+06	510741	2.55824e+06	1.54874e+06	1.02505e+06	544984	845411	1.06232e+06	1.16128e+06	1.17087e+06	208626	270466	724321	165444	1.2971e+06	487069	1.77087e+06	615976	745070	232759	128028	487009	1.38905e+06	165815	175763	242006	1.24433e+06	557089	1.82278e+06	1.24329e+06
High	LSNDMMGSYAEMK	[K].LSNDMMGSYAEMK.[F]	2xOxidation [M6; M]	2.18025e-06	0.000386037	1	1	186	P04114	P04114 [1738-1750]		0	1508.61	13	1.68877e+06	4.24552e+06	3.79805e+06	3.02946e+06	3.09519e+06	4.79515e+06	2.13549e+06	6.22615e+06	4.39292e+06	3.43761e+06	2.20321e+06	2.70901e+06	4.1663e+06	4.31618e+06	5.28948e+06	3.14741e+06	2.68279e+06	3.00037e+06	3.14449e+06	4.21692e+06	2.57454e+06	5.19044e+06	3.25891e+06	2.58902e+06	2.19857e+06	2.34542e+06	3.47862e+06	3.92098e+06	2.59014e+06	1.71186e+06	2.41213e+06	3.90113e+06	2.47212e+06	4.69006e+06	3.47019e+06
High	LSNDMMGSYAEMK	[K].LSNDMMGSYAEMK.[F]	3xOxidation [M5; M6; M12]	7.2764e-07	0.000386037	1	1	152	P04114	P04114 [1738-1750]		0	1524.6	13	4.91352e+06	7.98263e+06	7.82554e+06	7.2125e+06	8.19506e+06	8.5886e+06	5.0615e+06	8.14538e+06	9.02962e+06	7.88184e+06	5.31147e+06	5.00736e+06	9.81216e+06	7.35323e+06	1.06933e+07	9.40107e+06	8.09408e+06	6.00484e+06	1.00035e+07	6.95117e+06	5.74179e+06	8.08363e+06	7.23216e+06	4.74847e+06	5.65206e+06	7.42488e+06	8.88997e+06	7.11439e+06	1.24267e+07	4.72089e+06	8.13493e+06	5.88856e+06	4.31112e+06	8.86888e+06	6.97848e+06
High	LSEGASYLDHTFPAEK	[K].LSEGASYLDHTFPAEK.[M]		1.6961e-11	0.000386037	1	1	103	P12259	P12259 [122-137]		0	1764.84	16
High	LSEAEFEVLK	[R].LSEAEFEVLK.[A]		0.000185625	0.000386037	1	1	117	P04275	P04275 [1288-1297]		0	1164.61	10	1.78438e+06	1.70956e+06	1.78568e+06	907845		812169	1.83487e+06	1.24748e+06	1.32197e+06	1.84386e+06	579860	760524	173813	512168	548967	247640	1.47724e+06	1.42196e+06	249995	1.22977e+06	1.03271e+06	689967	362177	1.77409e+06	893631	1.70161e+06	218909	1.96526e+06	1.40267e+06	454002	1.50027e+06	759115	2.73378e+06	225199	1.07966e+06
High	ISASAEELR	[R].ISASAEELR.[Q]		0.00116635	0.000386037	1	1	534	P06727	P06727 [256-264]		0	975.511	9	6.04451e+07	7.37989e+07	6.26295e+07	4.35393e+07	8.02217e+07	5.94824e+07	5.60017e+07	5.83934e+07	5.71233e+07	5.82429e+07	3.54604e+07	6.54109e+07	5.7544e+07	6.02285e+07	5.70474e+07	4.47266e+07	4.47696e+07	5.98424e+07	5.70415e+07	5.77946e+07	4.33807e+07	4.08481e+07	5.708e+07	5.42905e+07	9.1592e+07	3.55471e+07	4.14941e+07	4.3048e+07	5.58807e+07	2.79927e+07	3.43602e+07	4.68884e+07	4.92162e+07	4.37228e+07	4.0988e+07
High	LRTEGDGVYTLNNEK	[K].LRTEGDGVYTLNNEK.[Q]		5.83501e-13	0.000386037	1	1	1618	P00738	P00738 [117-131]		1	1708.85	15	5.61623e+08	1.47092e+08	2.41227e+08	2.02757e+08	4.46246e+08	3.9784e+08	1.82419e+08	3.44554e+08	2.97477e+08	1.90834e+08	1.79151e+08	2.08994e+08	1.42476e+08	2.54852e+08	2.30728e+08	2.02211e+08	2.8628e+08	3.16456e+08	2.12256e+08	1.69584e+08	2.47837e+08	2.08322e+08	1.66588e+08	3.70292e+08	2.48625e+08	4.47217e+08	1.97324e+08	3.90998e+08	1.64657e+08	2.38573e+08	1.44511e+08	1.78562e+08	3.29774e+08	1.9006e+08	1.99788e+08
High	LQETSNWLLSQQQADGSFQDPCPVLDR	[K].LQETSNWLLSQQQADGSFQDPCPVLDR.[S]	1xCarbamidomethyl [C22]	6.38648e-08	0.000386037	1	1	14	P0C0L4	P0C0L4 [1100-1126]		0	3132.47	27	883759			837306													1.48812e+06	289910											495696
High	LQGSFDVSVK	[K].LQGSFDVSVK.[G]		0.00680373	0.000386037	1	1	94	P18428	P18428 [125-134]		0	1079.57	10	915121	1.64445e+06	1.40994e+06		844967	893951	702495	569775	776163	665591	1.2032e+06	872113	1.22717e+06	1.54852e+06	657806	876871	1.13699e+06	1.46963e+06	936441	473178	1.13974e+06	1.37004e+06	674943	920341	1.14178e+06	394169	642468	1.19719e+06	621421	783344	913729	701577	1.00956e+06	501750	1.08783e+06
High	LQGTLPVEAR	[K].LQGTLPVEAR.[E]		2.61832e-05	0.000386037	1	1	305	P01031	P01031 [1129-1138]		0	1083.62	10	1.78291e+07	1.11715e+07	1.67468e+07	1.16886e+07	1.234e+07	1.10578e+07	1.09323e+07	1.02792e+07	1.25461e+07	9.96351e+06	1.13759e+07	1.45282e+07	1.07351e+07	1.44416e+07	1.48466e+07	1.25362e+07	1.29956e+07	1.32393e+07	1.02614e+07	1.03911e+07	9.39178e+06	1.41685e+07	1.06774e+07	1.14513e+07	1.19687e+07	1.17059e+07	1.43955e+07	1.10263e+07	1.08203e+07	1.46789e+07	1.35696e+07	1.03711e+07	1.46136e+07	9.24919e+06	1.31797e+07
High	LQHLENELTHDIITK	[K].LQHLENELTHDIITK.[F]		3.12305e-17	0.000386037	1	1	6987	P01009	P01009 [284-298]		0	1803.96	15	7.18121e+08	6.6085e+08	7.81099e+08	7.46931e+08	7.07207e+08	3.78524e+08	6.26508e+08	5.44315e+08	5.4536e+08	6.61559e+08	5.61711e+08	7.55441e+08	7.7998e+08	8.55576e+08	6.00594e+08	7.54879e+08	8.76135e+08	8.50818e+08	6.72096e+08	6.65937e+08	6.89047e+08	5.15052e+08	8.9152e+08	7.77364e+08	7.8904e+08	6.5919e+08	5.65346e+08	7.43448e+08	9.13174e+08	8.33529e+08	9.00126e+08	8.05064e+08	9.05215e+08	5.33255e+08	6.4057e+08
High	IQHPFTVEEFVLPK	[R].IQHPFTVEEFVLPK.[F]		6.023e-08	0.000386037	1	1	108	P20742	P20742 [214-227]		0	1683.91	14	1.91297e+06		1.29026e+07	1.57114e+06	234099					960623	1.39583e+06	1.87898e+06	588411	167747	283384	1.41619e+06	3.31328e+06	1.21673e+06	610104	1.86206e+07	526897	3.797e+06		2.10011e+06	8.6663e+06	5.23869e+06	482187		1.60698e+07	7.2268e+06			497720	696113	3.29646e+06
High	IQNILTEEPK	[R].IQNILTEEPK.[V]		6.69769e-06	0.000386037	1	1	602	P27169	P27169 [307-316]		0	1184.65	10	1.26078e+07	1.02073e+07	2.02966e+07	1.11359e+07	1.15037e+07	1.39783e+07	9.27305e+06	1.23572e+07	1.26522e+07	9.04816e+06	8.58639e+06	1.4072e+07	1.00295e+07	9.43448e+06	1.12157e+07	1.15512e+07	1.60316e+07	1.08587e+07	1.03024e+07	1.18009e+07	7.78099e+06	9.54976e+06	1.89573e+07	9.80489e+06	9.4947e+06	1.14501e+07	1.39243e+07	1.1361e+07	1.65951e+07	1.75772e+07	1.01567e+07	1.22824e+07	1.04349e+07	1.15533e+07	1.10209e+07
High	IQPSGGTNINEALLR	[K].IQPSGGTNINEALLR.[A]		5.50275e-09	0.000386037	1	1	702	P19823	P19823 [380-394]		0	1582.85	15	3.98747e+07	2.9399e+07	4.3593e+07	3.43491e+07	2.59494e+07	3.57639e+07	3.37532e+07	3.45984e+07	4.03574e+07	3.37989e+07	4.66215e+07	5.08524e+07	4.9555e+07	4.27633e+07	4.06127e+07	4.02888e+07	4.80959e+07	4.7012e+07	3.28799e+07	3.08151e+07	3.8091e+07	3.81235e+07	5.34276e+07	5.24534e+07	4.76044e+07	5.25585e+07	3.87398e+07	5.35585e+07	5.51336e+07	5.17258e+07	5.95887e+07	4.87597e+07	4.98656e+07	3.0422e+07	4.06584e+07
High	LQSLFDSPDFSK	[K].LQSLFDSPDFSK.[I]		1.75825e-05	0.000386037	1	1	154	P36955	P36955 [334-345]		0	1383.68	12	5.39604e+06	3.6494e+06	3.23022e+06	2.58773e+06	4.98197e+06		4.31189e+06					3.69576e+06			3.30154e+06						5.22913e+06		2.86593e+06		4.73307e+06	4.29594e+06	3.33521e+06		2.92051e+06				5.00873e+06	5.50144e+06	3.42843e+06
High	LQELHLSSNGLESLSPEFLRPVPQLR	[K].LQELHLSSNGLESLSPEFLRPVPQLR.[V]		5.02744e-10	0.000386037	1	1	138	P02750	P02750 [94-119]		0	2959.6	26	2.10514e+06	1.78442e+06	2.65945e+06	3.06763e+06	3.84356e+06	2.0824e+06	3.23522e+06	1.86117e+06	1.91026e+06	3.04695e+06	3.22288e+06	2.48234e+06	2.99828e+06	2.55848e+06	1.57203e+06	3.8089e+06	3.43319e+06	3.69126e+06	2.71759e+06	2.53184e+06	3.63594e+06	2.99924e+06	2.77658e+06	2.1685e+06	2.83967e+06	5.37762e+06	2.07584e+06	2.61365e+06	1.49012e+06	3.94324e+06	2.53141e+06	3.24695e+06	2.48119e+06	3.43529e+06	4.13301e+06
High	LQSTTVMNPYMK	[K].LQSTTVMNPYMK.[L]		9.94552e-06	0.000386037	1	1	20	P04114	P04114 [4542-4553]		0	1412.69	12		133490		255032	281347	558491	261667	994295	515076	391776		433075	494848	467894	296704	163094	178495	279269		537987	464683	989518	432128	343684	192590	238998	230491	529624	140137	183376	227083	669564	308158	1.14442e+06	487249
High	LQSTTVMNPYMK	[K].LQSTTVMNPYMK.[L]	2xOxidation [M7; M11]	2.00014e-06	0.000386037	1	1	417	P04114	P04114 [4542-4553]		0	1444.68	12	4.67283e+06	7.64871e+06	9.13226e+06	6.54114e+06	5.77502e+06	8.17069e+06	4.92466e+06	8.10264e+06	8.13256e+06	5.25655e+06	5.70126e+06	5.23781e+06	8.6414e+06	6.88712e+06	9.62701e+06	7.39793e+06	6.46168e+06	5.955e+06	7.91305e+06	6.65706e+06	5.11723e+06	7.96027e+06	5.45889e+06	5.40517e+06	4.74366e+06	6.23834e+06	7.22743e+06	5.97816e+06	9.69832e+06	4.32937e+06	6.42794e+06	6.19469e+06	4.2393e+06	7.60006e+06	6.39904e+06
High	LQVELDNVTGLLSQSDSK	[K].LQVELDNVTGLLSQSDSK.[S]		1.43309e-08	0.000386037	1	1	5	P35579	P35579 [1278-1295]		0	1946.01	18	664245			454742	437675	75198.5	501091	391181			846873	659725		728024	622724		465681	531435			560781		510679	634167		413408		636558			493983	429530	344738		546452
High	IRAYYENSPQQVFSTEFEVK	[K].IRAYYENSPQQVFSTEFEVK.[E]		2.77076e-10	0.000386037	1	1	73	P01024	P01024 [206-225]		1	2435.19	20	650420	610627	526585	723337	491840	542166	877371	704088	641096	857506	575713	450212	442552	668709	681870	653856	689895	564464	807723	544486	815304	574802	349899	500158	582481	921390	844240	701338	477943	424293	494590	625245	852839	490725	592248
High	IREEGTDLEVTANR	[R].IREEGTDLEVTANR.[I]		1.23779e-08	0.000386037	1	1	31	P20742	P20742 [322-335]		1	1602.81	14	348743	162504	1.2001e+07	1.29736e+06	300899	117382	311633	283340		827347	1.03696e+06	1.77849e+06	320222		182889	1.48721e+06	2.72277e+06	1.04965e+06	454294	1.32806e+07	696040	2.76465e+06	382806	1.36257e+06	4.66893e+06	4.97526e+06	489784		1.1377e+07	4.25082e+06	399270	679728	469802	689676	2.3068e+06
High	LREQLGPVTQEFWDNLEK	[K].LREQLGPVTQEFWDNLEK.[E]		9.10037e-19	0.000386037	1	1	2245	P02647	P02647 [84-101]		1	2202.12	18	2.12407e+08	1.92375e+08	2.67075e+08	1.22237e+08	2.35697e+08	1.62189e+08	2.78668e+08	1.89811e+08	1.50382e+08	1.97032e+08	1.73191e+08	1.81419e+08	2.27412e+08	1.49883e+08	1.59958e+08	2.57724e+08	1.98945e+08	1.85969e+08	2.35925e+08	2.39645e+08	1.55935e+08	1.11934e+08	1.87613e+08	1.67529e+08	3.91778e+08	1.60607e+08	1.69673e+08	1.93721e+08	1.77505e+08	4.05814e+08	2.23137e+08	2.07434e+08	2.61018e+08	2.0932e+08	1.40198e+08
High	IRLENEIQTYR	[K].IRLENEIQTYR.[S]		0.0087916	0.000386037	1	1	12	P13645	P13645 [440-450]		1	1434.77	11					1.55385e+06	842939	321885		394689	851078	1.03122e+06	271978		342511					568686		262617
High	LRTEGDGVYTLNDK	[RK].LRTEGDGVYTLNDK.[K]		2.43443e-11	0.000386037	2	2	1018	P00739; P00738	P00739 [59-72]; P00738 [58-71]		1	1580.79	14	2.14399e+08	1.03322e+08	1.53432e+08	2.88233e+08	1.96598e+08	9.83872e+06	1.40002e+08	1.42666e+08	2.21537e+08	1.52406e+08	1.48425e+08	2.96278e+08	2.05112e+08	1.89631e+08	1.83085e+08	1.48144e+08	1.04164e+08	1.22341e+08	2.82546e+08	1.73292e+08	1.03573e+08	3.04358e+08	1.21658e+08	3.04465e+08	1.96801e+08	6.83731e+06	1.44332e+08	1.62101e+08	1.72041e+08	1.06617e+08	5.33879e+07	6.05927e+07	2.93949e+08	1.31823e+08	1.98947e+08
High	LRTEGDGVYTLNDKK	[RK].LRTEGDGVYTLNDKK.[Q]		4.93941e-07	0.000386037	2	2	195	P00739; P00738	P00739 [59-73]; P00738 [58-72]		2	1708.89	15	2.06027e+07	8.05263e+06	1.43982e+07	3.20599e+07	1.70717e+07	357677	1.65661e+07	1.24777e+07	2.8922e+07	2.12247e+07	1.66743e+07	3.21505e+07	1.98027e+07	1.71566e+07	1.81054e+07	1.70735e+07	1.13243e+07	1.35979e+07	5.65228e+07	1.99574e+07	1.26342e+07	3.26058e+07	8.45672e+06	2.49805e+07	1.90287e+07	402533	1.60028e+07	1.80385e+07	1.78819e+07	9.66199e+06	6.30742e+06	9.86574e+06	4.26809e+07	2.02958e+07	1.53819e+07
High	LQSTTVMNPYMK	[K].LQSTTVMNPYMK.[L]	1xOxidation [M]	1.85904e-05	0.000386037	1	1	81	P04114	P04114 [4542-4553]		0	1428.69	12	1.84185e+06		1.84616e+06	1.73247e+06	409813	3.12764e+06	3.72021e+06	6.87621e+06	2.74522e+06	2.28409e+06	2.80535e+06	3.04275e+06	2.19143e+06	3.92215e+06	1.30095e+06	1.99701e+06	1.65811e+06	1.08895e+06	1.17863e+06	2.84991e+06	1.12036e+06	4.33263e+06	2.08338e+06	3.82051e+06	1.93124e+06	1.12676e+06	4.20912e+06	3.89271e+06	3.47949e+06		3.03614e+06	4.86407e+06	1.97617e+06	2.23966e+06	3.8754e+06
High	IMNGEADAMSLDGGFVYIAGK	[K].IMNGEADAMSLDGGFVYIAGK.[C]	2xOxidation [M2; M9]	1.0485e-20	0.000386037	1	1	2998	P02787	P02787 [400-420]		0	2191	21	1.19671e+08	1.51476e+08	2.09676e+08	1.20032e+08	1.57867e+08	1.27817e+08	1.48521e+08	1.33843e+08	1.27733e+08	1.64479e+08	1.67462e+08	1.58752e+08	1.54821e+08	1.41519e+08	1.4e+08	1.64438e+08	1.34606e+08	1.29997e+08	1.65511e+08	1.57222e+08	1.21872e+08	9.55956e+07	1.75594e+08	1.649e+08	1.61866e+08	1.29585e+08	1.6049e+08	1.11288e+08	2.1148e+08	1.59251e+08	1.73113e+08	1.28193e+08	1.61097e+08	1.44558e+08	1.40301e+08
High	IMNGEADAMSLDGGFVYIAGK	[K].IMNGEADAMSLDGGFVYIAGK.[C]	1xOxidation [M]	4.43909e-21	0.000386037	1	1	2025	P02787	P02787 [400-420]		0	2175.01	21	4.81589e+07	6.159e+07	5.78934e+07	4.68948e+07	6.07231e+07	6.01322e+07	6.68494e+07	7.8119e+07	6.19771e+07	6.78896e+07	6.98646e+07	5.90585e+07	7.74751e+07	6.18332e+07	5.48194e+07	4.9392e+07	5.17823e+07	5.76149e+07	4.20135e+07	8.8611e+07	5.39461e+07	4.88177e+07	8.62899e+07	6.2889e+07	5.42458e+07	3.64512e+07	6.01827e+07	5.0223e+07	4.16754e+07	7.8639e+07	5.74909e+07	5.4966e+07	6.73764e+07	8.03526e+07	6.91405e+07
High	IMNGEADAMSLDGGFVYIAGK	[K].IMNGEADAMSLDGGFVYIAGK.[C]		1.52337e-15	0.000386037	1	1	112	P02787	P02787 [400-420]		0	2159.01	21	6.57996e+06	4.68013e+06	4.92512e+06	4.19692e+06	6.54359e+06	1.00794e+07	1.0068e+07	1.66636e+07	1.19538e+07	1.16984e+07	1.29622e+07	7.81503e+06	1.5229e+07	1.14332e+07	6.26103e+06	3.1868e+06	4.21725e+06	6.20952e+06	2.55228e+06	1.89256e+07	6.60099e+06	5.21295e+06	1.4161e+07	1.01768e+07	3.99501e+06	1.46083e+06	5.24338e+06	5.53732e+06	2.72323e+06	8.83565e+06	7.19439e+06	1.06198e+07	1.1703e+07	1.72777e+07	1.07828e+07
High	LLDLVFLLDGSSR	[R].LLDLVFLLDGSSR.[L]		2.91652e-09	0.000386037	1	1	80	P04275	P04275 [1275-1287]		0	1447.82	13	139464	841721	411216	287841		376560	337170	363780	227287	790978	196127	38370.1			116859	57297.5	222492	292727		203563	353093	142139		234908	214290	745779		391808	144064	147169	295083	80286.4	225905	72912.1	622684
High	LLDNWDSVTSTFSK	[K].LLDNWDSVTSTFSK.[L]		2.89529e-12	0.000386037	1	1	4559	P02647	P02647 [70-83]		0	1612.79	14	8.81969e+08	7.53436e+08	1.04813e+09	7.354e+08	8.48595e+08	8.75988e+08	9.38068e+08	1.00792e+09	6.15204e+08	7.04412e+08	7.03026e+08	8.67936e+08	8.25895e+08	7.23221e+08	7.76441e+08	9.26508e+08	6.83144e+08	7.90624e+08	6.71329e+08	8.48625e+08	6.38562e+08	5.98281e+08	8.38061e+08	7.91202e+08	1.0657e+09	6.90104e+08	6.03656e+08	6.60835e+08	7.32474e+08	1.18231e+09	8.55784e+08	6.85318e+08	7.56693e+08	7.2636e+08	6.4192e+08
High	LIDQYGTHYLQSGSLGGEYR	[R].LIDQYGTHYLQSGSLGGEYR.[V]		3.34404e-17	0.000386037	1	1	281	P10643	P10643 [295-314]		0	2257.09	20	6.238e+06	9.60185e+06	4.9365e+06	8.02824e+06	1.0061e+07	7.08528e+06	8.45943e+06	6.64097e+06	8.264e+06	8.44261e+06	8.85503e+06	7.66388e+06	6.75672e+06	5.90416e+06	3.83967e+06	7.23601e+06	1.19957e+07	8.0654e+06	6.93827e+06	6.36893e+06	7.22149e+06	7.07718e+06	1.19828e+07	8.28177e+06	6.25584e+06	8.72648e+06	7.36231e+06	6.9087e+06	7.27829e+06	7.8439e+06	1.08886e+07	8.53413e+06	9.17686e+06	7.7967e+06	7.05362e+06
High	LLDSLPSDTR	[R].LLDSLPSDTR.[L]		1.60206e-05	0.000386037	1	1	431	P05155	P05155 [277-286]		0	1116.59	10	1.13997e+08	7.45725e+07	8.29985e+07	9.59527e+07	8.80674e+07	8.75164e+07	7.88408e+07	9.06473e+07	8.01981e+07	5.7618e+07	7.30084e+07	8.61729e+07	4.56153e+07	9.15121e+07	8.65798e+07	2.20899e+07	8.25941e+07	7.78488e+07	6.97221e+07	5.65706e+07	6.40698e+07	3.55962e+07	8.8941e+07	9.02574e+07	1.32209e+07	7.43365e+07	1.51444e+07	6.57186e+07	7.36846e+07	1.32468e+07	9.02611e+07	3.53216e+07	7.63424e+07	2.8521e+07	7.73485e+07
High	LLDSLPSDTRLVLLNAIYLSAK	[R].LLDSLPSDTRLVLLNAIYLSAK.[W]		2.03694e-08	0.000386037	1	1	119	P05155	P05155 [277-298]		1	2415.39	22	423505	653269	457407	1.07512e+06	646904	1.01644e+06	490727	968559	529650	1.19709e+06	894239	142619	332826	799943	557683		487808	850548	993439	612154	983396	362521	325326	692803	162104	2.15771e+06	373003	986406	262593	211480	827664	405166	682240	372222	1.05119e+06
High	LIDVISMYR	[K].LIDVISMYR.[E]		0.000115014	0.000386037	1	1	272	P04114	P04114 [4262-4270]		0	1109.6	9	3.60293e+06	5.04688e+06	3.80813e+06	7.11391e+06	5.7748e+06	1.10799e+07	5.26147e+06	1.41794e+07	9.75346e+06	7.42252e+06	5.43247e+06	6.54412e+06	1.16439e+07	8.32311e+06	1.15797e+07	6.83981e+06	5.41853e+06	5.27988e+06	5.75575e+06	9.16224e+06	7.1863e+06	1.12053e+07	6.32807e+06	6.82669e+06	4.80855e+06	4.75122e+06	8.32253e+06	7.85229e+06	5.33883e+06	4.60402e+06	5.67443e+06	8.99461e+06	6.10713e+06	1.3315e+07	9.37435e+06
High	LIDVISMYR	[K].LIDVISMYR.[E]	1xOxidation [M7]	0.00171522	0.000386037	1	1	406	P04114	P04114 [4262-4270]		0	1125.6	9	2.10611e+07	2.86832e+07	2.82154e+07	3.35699e+07	2.94766e+07	4.01993e+07	2.07851e+07	4.06486e+07	3.61994e+07	2.81873e+07	2.48776e+07	2.95453e+07	4.87983e+07	3.78197e+07	5.11684e+07	4.21459e+07	3.25785e+07	2.57528e+07	4.28975e+07	3.12254e+07	3.08144e+07	4.70913e+07	3.00832e+07	2.93682e+07	2.85328e+07	3.30087e+07	3.65839e+07	4.11163e+07	4.24061e+07	2.52653e+07	3.25201e+07	4.02051e+07	2.16447e+07	4.07394e+07	3.2139e+07
High	ILEDMQEEDYLNFILFSGDVSTWK	[R].ILEDMQEEDYLNFILFSGDVSTWK.[E]	1xOxidation [M5]	1.19045e-06	0.000386037	1	1	74	Q06033	Q06033 [310-333]		0	2908.36	24	119680	280479	452970	942238	864933	248407	847974	387215	277706	833548	1.09523e+06	467185	184007	240434	505037	617223	299542	408533	616909	312981	700254	753959	747932	498153	736145	2.05542e+06	659084	834046	308660	671275	637215	442970	150857	408594	1.31071e+06
High	LLEGEDAHLSSQQASGQSYSSR	[R].LLEGEDAHLSSQQASGQSYSSR.[E]		1.23779e-08	0.000386037	1	1	4	P08779	P08779 [420-441]		0	2350.09	22						652682				1.49479e+06
High	IIEVEEEQEDPYLNDR	[K].IIEVEEEQEDPYLNDR.[C]		2.28471e-13	0.000386037	1	1	277	P23142	P23142 [164-179]		0	1990.92	16	2.51869e+06	2.32897e+06	1.52852e+06	1.81744e+06	1.46773e+06	1.73879e+06	1.68395e+06	1.61343e+06	1.41069e+06	1.87466e+06	2.1346e+06	1.89625e+06	2.34756e+06	1.88022e+06	2.20055e+06	1.89002e+06	2.13444e+06	1.9279e+06	1.54092e+06	1.50326e+06	1.96852e+06	1.96781e+06	3.46771e+06	2.69715e+06	1.91873e+06	2.2408e+06	2.43269e+06	1.64351e+06	2.26361e+06	1.89105e+06	2.3806e+06	2.34069e+06	2.33195e+06	1.64073e+06	2.06857e+06
High	IIFHENYNAGTYQNDIALIEMK	[R].IIFHENYNAGTYQNDIALIEMK.[K]		1.05101e-11	0.000386037	1	1	151	P05156	P05156 [415-436]		0	2597.27	22	1.43373e+06	1.67108e+06	1.10458e+06	1.9175e+06	1.49639e+06	1.52298e+06	2.09761e+06	2.153e+06	1.83738e+06	2.31107e+06	1.94389e+06	1.52231e+06	2.00728e+06	2.07121e+06	1.94741e+06	1.53886e+06	1.63157e+06	2.07073e+06	1.48595e+06	1.83876e+06	1.99465e+06	1.97338e+06	1.67416e+06	1.75287e+06	2.06228e+06	1.42919e+06	1.67322e+06	2.20367e+06	898665	1.9578e+06	1.28731e+06	1.61514e+06	1.37998e+06	1.66926e+06	1.92675e+06
High	IIFHENYNAGTYQNDIALIEMK	[R].IIFHENYNAGTYQNDIALIEMK.[K]	1xOxidation [M21]	5.66652e-13	0.000386037	1	1	214	P05156	P05156 [415-436]		0	2613.27	22	4.59767e+06	3.02439e+06	5.95987e+06	3.73781e+06	3.06457e+06	2.48212e+06	1.96327e+06	2.90262e+06	2.84418e+06	3.32891e+06	3.15635e+06	2.38541e+06	2.7545e+06	3.21247e+06	3.24597e+06	3.01033e+06	3.1457e+06	3.4897e+06	3.90612e+06	3.27976e+06	2.41109e+06	3.34745e+06	2.48672e+06	3.03902e+06	4.04776e+06	2.7643e+06	3.06519e+06	3.15536e+06	2.20125e+06	2.8568e+06	2.74195e+06	2.16266e+06	3.06206e+06	2.81457e+06	3.99988e+06
High	ILGDMQPGDYFDLVLFGTR	[K].ILGDMQPGDYFDLVLFGTR.[V]		2.17053e-14	0.000386037	1	1	144	P19827	P19827 [318-336]		0	2157.07	19	816215	1.23177e+06	734278	2.03633e+06	1.34606e+06	1.48749e+06	1.24558e+06	1.60649e+06	1.30984e+06	1.91244e+06	1.55303e+06	741703	1.63608e+06	1.50225e+06	2.10098e+06	1.36049e+06	1.01019e+06	1.51552e+06	1.31408e+06	1.67294e+06	1.88715e+06	1.22107e+06	1.29249e+06	1.63634e+06	1.7512e+06	1.78856e+06	2.00173e+06	2.43821e+06	553462	1.4433e+06	1.30723e+06	932718	1.1554e+06	1.98845e+06	2.02099e+06
High	ILGDMQPGDYFDLVLFGTR	[K].ILGDMQPGDYFDLVLFGTR.[V]	1xOxidation [M5]	2.79802e-14	0.000386037	1	1	544	P19827	P19827 [318-336]		0	2173.06	19	4.8949e+06	8.67465e+06	1.05983e+07	1.16426e+07	8.13267e+06	1.0988e+07	7.81272e+06	8.94657e+06	7.2016e+06	9.4908e+06	1.06812e+07	5.71692e+06	1.1474e+07	9.57975e+06	1.18944e+07	1.10335e+07	9.11951e+06	1.33051e+07	1.65768e+07	7.44255e+06	8.44676e+06	5.75493e+06	8.34624e+06	1.3656e+07	1.29608e+07	1.58674e+07	1.67197e+07	1.53782e+07	5.58552e+06	1.30008e+07	1.01491e+07	6.61774e+06	8.48244e+06	7.62665e+06	1.44979e+07
High	ILGEELGFASLHDLQLLGK	[R].ILGEELGFASLHDLQLLGK.[L]		1.77675e-20	0.000386037	1	1	575	P04114	P04114 [779-797]		0	2053.13	19	1.14117e+07	3.43368e+07	2.39618e+07	2.90731e+07	3.15789e+07	3.87609e+07	2.52039e+07	4.03097e+07	2.37895e+07	3.46636e+07	2.51897e+07	1.31468e+07	4.49528e+07	3.58973e+07	5.81359e+07	4.6027e+07	2.4437e+07	3.25053e+07	4.0841e+07	2.95621e+07	4.14784e+07	4.58004e+07	2.98628e+07	2.81197e+07	3.05101e+07	3.66608e+07	4.45778e+07	4.53611e+07	2.03058e+07	2.53587e+07	2.56977e+07	3.23251e+07	1.59664e+07	4.55732e+07	4.62351e+07
High	LLGEVDHYQLALGK	[R].LLGEVDHYQLALGK.[F]		5.73609e-12	0.000386037	1	1	328	O75636	O75636 [200-213]		0	1555.85	14	8.16285e+06	4.69751e+06	5.60881e+06	5.75526e+06	7.66852e+06	6.53247e+06	5.43983e+06	7.00754e+06	9.9465e+06	6.91529e+06	3.4788e+06	6.36751e+06	8.06375e+06	8.70262e+06	1.16906e+07	3.77775e+06	6.86211e+06	8.58195e+06	4.19205e+06	5.99863e+06	9.009e+06	9.3728e+06	4.56732e+06	2.76419e+06	7.11287e+06	3.63529e+06	7.60877e+06	8.40669e+06	6.25177e+06	4.20107e+06	7.49028e+06	6.04172e+06	2.57374e+06	7.72029e+06	5.98349e+06
High	ILGGHLDAK	[R].ILGGHLDAK.[G]		8.24124e-06	0.000386037	2	2	2694	P00739; P00738	P00739 [104-112]; P00738 [162-170]		0	923.531	9	1.22648e+09	6.14784e+08	1.04785e+09	8.37119e+08	9.41885e+08	7.14558e+08	4.72813e+08	8.19451e+08	6.25312e+08	4.94605e+08	4.39532e+08	7.6225e+08	5.89775e+08	7.56284e+08	6.10604e+08	6.48084e+08	6.45918e+08	6.26437e+08	7.66863e+08	5.92601e+08	5.44426e+08	7.47846e+08	7.56601e+08	6.6326e+08	6.5427e+08	7.68042e+08	7.36309e+08	5.88182e+08	5.80655e+08	5.58557e+08	4.05801e+08	2.79869e+08	6.47214e+08	6.11401e+08	5.14004e+08
High	LIASMSSDSLR	[K].LIASMSSDSLR.[H]	1xOxidation [M5]	0.000188923	0.000386037	1	1	148	P00488	P00488 [706-716]		0	1195.6	11	2.17847e+06	1.45273e+06	2.3005e+06	1.15081e+06	1.01172e+06	1.35072e+06	2.10254e+06	1.50609e+06	1.67184e+06	1.26982e+06	1.28824e+06	1.51424e+06	1.26246e+06	1.19367e+06	1.87315e+06	1.76409e+06	2.1485e+06	1.73859e+06	1.52169e+06	1.15548e+06	1.55171e+06	1.20926e+06	1.50202e+06	1.13706e+06	1.1217e+06	1.3465e+06	1.9095e+06	1.66072e+06	1.43759e+06	1.61064e+06	1.60366e+06	1.71856e+06	1.09285e+06	568816	1.13375e+06
High	ILAQATSDLVNAIK	[R].ILAQATSDLVNAIK.[A]		1.27346e-06	0.000386037	1	1	7	Q9Y490	Q9Y490 [828-841]		0	1456.84	14	128772	171815	236805	270596	131489		109903	154856		156306		220112	103476	161309	166121	147462	287822	500631			154728	274712	155277	298776	77464.9	121130	125140	742824		115941	212043	244467	440579		231816
High	ILAGPAGDSNVVK	[R].ILAGPAGDSNVVK.[L]		0.00872605	0.000386037	1	1	42	P04275	P04275 [1838-1850]		0	1240.69	13	2.87633e+06	2.79589e+06	2.98466e+06	1.59943e+06		1.42774e+06	2.7175e+06	2.44616e+06	2.21806e+06	2.78458e+06	885190	760437	413678	694443	804487	415304	2.51182e+06	2.31945e+06	512727	2.16557e+06	1.51475e+06	929903	417135	1.67079e+06	678500	2.24929e+06	316837	2.67793e+06	1.97846e+06	460846	2.20447e+06	1.24412e+06	4.66775e+06	284700	1.83646e+06
High	IIAATIENAQPILQIDNAR	[K].IIAATIENAQPILQIDNAR.[L]		7.11076e-08	0.000386037	1	1	2	P08779	P08779 [178-196]		0	2064.14	19										1.38234e+06
High	LGNQEPGGQTALK	[K].LGNQEPGGQTALK.[S]		4.57062e-07	0.000386037	1	1	406	P08697	P08697 [52-64]		0	1312.69	13	2.27357e+07	2.01404e+07	2.63224e+07	1.88581e+07	2.38546e+07	1.90768e+07	1.9236e+07	1.7285e+07	2.05532e+07	1.33659e+07	1.75896e+07	2.13259e+07	2.11597e+07	1.64724e+07	2.63314e+07	1.85806e+07	2.13536e+07	1.85844e+07	2.32922e+07	2.19809e+07	1.61919e+07	1.94372e+07	2.44314e+07	1.71785e+07	2.11526e+07	2.07255e+07	2.26145e+07	1.63969e+07	1.82775e+07	2.11349e+07	1.69692e+07	1.8135e+07	2.03169e+07	1.22175e+07	1.70697e+07
High	LGPHAGDVEGHLSFLEK	[K].LGPHAGDVEGHLSFLEK.[D]		3.0927e-17	0.000386037	1	1	652	P06727	P06727 [329-345]		0	1805.92	17	5.13523e+07	5.25362e+07	3.91441e+07	4.21379e+07	7.21027e+07	5.32337e+07	5.22485e+07	5.45756e+07	5.36602e+07	5.06933e+07	4.01866e+07	7.29823e+07	5.57859e+07	7.08133e+07	5.68073e+07	6.5074e+07	5.17465e+07	5.65206e+07	5.60144e+07	5.51483e+07	5.59895e+07	4.58429e+07	6.12311e+07	5.44649e+07	8.50048e+07	3.73854e+07	4.82935e+07	6.57791e+07	5.71075e+07	3.80002e+07	3.45534e+07	7.2924e+07	6.80962e+07	5.60369e+07	6.30417e+07
High	LGPLVEQGR	[R].LGPLVEQGR.[V]		0.000498992	0.000386037	1	1	388	P02649	P02649 [199-207]		0	968.552	9	4.58538e+07	3.51141e+07	2.82907e+07	4.44381e+07	2.75073e+07	3.67618e+07	3.24906e+07	3.4654e+07	4.96798e+07	2.82235e+07	2.19621e+07	3.14965e+07	3.44656e+07	2.09716e+07	3.43839e+07	2.93301e+07	2.99357e+07	2.79996e+07	4.47057e+07	2.64642e+07	1.07825e+08	3.63971e+07	2.47701e+07	5.96889e+07	3.01188e+07	3.75351e+07	2.83064e+07	3.21812e+07	3.11025e+07	1.85395e+07	4.00052e+07	2.55339e+07	2.05433e+07	3.76262e+07	3.54211e+07
High	IGQDGISTSATTNLK	[R].IGQDGISTSATTNLK.[C]		5.1017e-12	0.000386037	1	1	401	P04114	P04114 [1647-1661]		0	1505.78	15	2.25759e+07	3.4843e+07	4.05204e+07	2.99045e+07	3.07538e+07	3.6788e+07	2.09801e+07	3.82783e+07	3.73744e+07	3.01976e+07	2.15991e+07	1.98838e+07	3.95378e+07	3.52707e+07	4.12956e+07	2.9113e+07	2.91972e+07	2.52751e+07	3.10712e+07	3.02736e+07	2.63805e+07	3.76708e+07	2.24588e+07	2.11529e+07	1.87849e+07	2.52529e+07	3.16791e+07	3.38094e+07	3.16867e+07	1.50791e+07	2.851e+07	3.03592e+07	1.92077e+07	3.79215e+07	2.91815e+07
High	LGQYASPTAK	[K].LGQYASPTAK.[R]		0.000123515	0.000386037	2	2	317	P0C0L4; P0C0L5	P0C0L4 [691-700]; P0C0L5 [691-700]		0	1035.55	10	3.90174e+07	2.28918e+07	3.03283e+07	3.08637e+07	1.87161e+07	2.10275e+07	1.55443e+07	2.57157e+07	2.43918e+07	2.19447e+07	1.8361e+07	2.01917e+07	1.4999e+07	1.96063e+07	2.06228e+07	1.25691e+07	2.12228e+07	2.58411e+07	1.97592e+07	1.67998e+07	1.94449e+07	1.97593e+07	4.61947e+06	1.52024e+07	2.61165e+07	1.01902e+07	2.01355e+07	1.86721e+07	1.38791e+07	1.22192e+07	1.551e+07	1.9256e+07	1.87742e+07	1.67924e+07	1.44018e+07
High	LGVYELLLK	[R].LGVYELLLK.[V]		7.75201e-05	0.000386037	1	1	617	Q14624	Q14624 [154-162]		0	1047.64	9	4.18288e+07	3.23387e+07	4.67433e+07	4.67445e+07	4.09981e+07	3.49753e+07	3.50803e+07	3.63465e+07	3.4954e+07	3.27445e+07	4.40692e+07	4.21973e+07	3.58695e+07	3.67918e+07	3.83694e+07	4.59129e+07	5.09322e+07	3.18345e+07	4.18998e+07	3.45886e+07	3.69832e+07	4.15109e+07	3.93469e+07	4.75851e+07	6.14117e+07	3.82989e+07	4.51405e+07	4.75048e+07	3.31582e+07	5.99504e+07	3.72254e+07	3.78618e+07	3.87378e+07	4.37667e+07	5.03324e+07
High	IGWPNAPILIQDFETLPR	[R].IGWPNAPILIQDFETLPR.[E]		1.5345e-08	0.000386037	1	1	70	P04275	P04275 [1642-1659]		0	2080.12	18	528417	687546	836315	594628	309316	334247	860357	718227	521770	986964	540023	183884	326650	255167	234353	224278	642311	466485	317612	602610	480260	276126	176840	892877	320689	719378	299654	1.01405e+06	406774	420903	745588	205644	922596	329034	439385
High	LGYVTADGETSGSITCGK	[K].LGYVTADGETSGSITCGK.[D]	1xCarbamidomethyl [C16]	1.98783e-10	0.000386037	1	1	99	P08603	P08603 [479-496]		0	1815.84	18	724745		742465	437888	460090			219959	416786		293187	429197	320506	483359		459359	387372	364002	302403		421934	392826		399680			461911	527517		361012			403981	347405	383268
High	IIGGSDADIK	[R].IIGGSDADIK.[N]		0.000788298	0.000386037	1	1	193	P09871	P09871 [438-447]		0	988.531	10	1.66658e+07	1.36281e+07	1.63514e+07	1.29078e+07	1.314e+07	1.22601e+07	1.27803e+07	1.25063e+07	1.04561e+07	9.507e+06	1.14838e+07	1.1353e+07	1.29353e+07	1.23421e+07	1.33269e+07	1.07666e+07	1.25946e+07	1.30913e+07	9.80604e+06	1.0593e+07	1.17631e+07	1.4994e+07	1.2058e+07	1.23176e+07	1.25686e+07	9.2861e+06	1.25225e+07	1.05681e+07	1.15968e+07	1.21716e+07	1.4103e+07	1.03608e+07	1.03916e+07	1.09113e+07	9.89913e+06
High	LHDNQNGWSGDSAPVELILSDETLPAPEFSPEPESGR	[R].LHDNQNGWSGDSAPVELILSDETLPAPEFSPEPESGR.[A]		1.04853e-24	0.000386037	1	1	198	P04217	P04217 [283-319]		0	3990.86	37	6.98018e+06	8.75063e+06	1.76794e+07	1.73033e+07	7.03399e+06	1.13051e+07	7.63445e+06	1.26338e+07	1.10684e+07	1.31363e+07	1.25212e+07	6.05193e+06	1.1207e+07	1.50319e+07	1.39485e+07	1.92114e+07	1.30029e+07	7.45083e+06	1.57026e+07	7.08986e+06	1.33051e+07	1.79281e+07	1.7182e+07	1.89707e+07	1.97589e+07	1.59387e+07	1.50334e+07	1.60847e+07	1.26144e+07	1.71585e+07	8.37241e+06	6.34962e+06	1.42079e+07	1.4624e+07	1.62519e+07
High	LHLETDSLALVALGALDTALYAAGSK	[K].LHLETDSLALVALGALDTALYAAGSK.[S]		6.45003e-28	0.000386037	2	2	597	P0C0L4; P0C0L5	P0C0L4 [589-614]; P0C0L5 [589-614]		0	2613.41	26	3.08877e+07	4.64244e+07	3.1212e+07	8.69697e+07	3.2858e+07	5.99205e+07	1.89159e+07	3.3559e+07	2.59844e+07	6.41572e+07	3.89561e+07	9.64526e+06	1.98158e+07	2.97993e+07	2.98442e+07	2.40653e+07	2.64131e+07	5.22222e+07	3.73349e+07	2.1487e+07	5.31608e+07	4.56321e+07	5.81299e+06	2.63104e+07	5.43758e+07	2.13915e+07	3.71243e+07	3.26545e+07	8.60679e+06	2.91289e+07	2.42629e+07	1.19328e+07	9.66195e+06	3.71919e+07	5.38014e+07
High	IHLISTQSAIPYALR	[K].IHLISTQSAIPYALR.[V]		3.62454e-12	0.000386037	1	1	585	P02679	P02679 [259-273]		0	1682.96	15	2.08953e+07	1.97462e+07	1.99357e+07	2.7807e+07	1.68222e+07	1.84791e+07	2.36976e+07	2.40389e+07	2.50984e+07	2.23661e+07	2.61473e+07	1.55613e+07	1.99043e+07	1.50553e+07	1.42318e+07	2.02707e+07	2.29013e+07	2.64278e+07	3.21613e+07	2.49255e+07	2.90791e+07	1.70474e+07	1.26651e+07	1.86124e+07	1.5568e+07	2.49402e+07	2.25235e+07	2.12764e+07	2.47201e+07	1.83403e+07	1.55771e+07	5.44832e+07	6.17965e+07	1.07477e+07	1.58698e+07
High	IHLISTQSAIPYALRVELEDWNGR	[K].IHLISTQSAIPYALRVELEDWNGR.[T]		6.23267e-07	0.000386037	1	1	4	P02679	P02679 [259-282]		1	2781.47	24	84486.5				204939	346150	258753	320200		481071	342430		322807			522341	274547	201757	777535	280875	696618	132490		84609	386011	767400	367021	300190				1.0868e+06	833615
High	IHSGSFQSQVELSNDQEK	[R].IHSGSFQSQVELSNDQEK.[A]		3.58067e-17	0.000386037	1	1	367	P04114	P04114 [3639-3656]		0	2032.96	18	2.12226e+07	3.21935e+07	1.65906e+07	2.70766e+07	2.65951e+07	3.61417e+07	1.07745e+07	3.96144e+07	1.84658e+07	3.02889e+07	9.53207e+06	2.0225e+07	3.68019e+07	3.00452e+07	3.90121e+07	3.18137e+07	2.87509e+07	2.38945e+07	3.04786e+07	2.60816e+07	1.30909e+07	1.81206e+07	2.18781e+07	1.97735e+07	1.85241e+07	3.2105e+07	3.07566e+07	3.49858e+07	2.40516e+07	1.70535e+07	2.57737e+07	3.33714e+07	1.98136e+07	2.09626e+07	2.82464e+07
High	LHTEAQIQEEGTVVELTGR	[K].LHTEAQIQEEGTVVELTGR.[Q]		1.35826e-22	0.000386037	1	1	2701	P01023	P01023 [320-338]		0	2110.08	19	1.58862e+08	1.97186e+08	1.50182e+08	1.74771e+08	1.72381e+08	1.16574e+08	1.64857e+08	9.28042e+07	1.67551e+08	1.19434e+08	2.01994e+08	1.0603e+08	1.46186e+08	1.22869e+08	1.11407e+08	1.53503e+08	1.55985e+08	1.80901e+08	1.05775e+08	1.6411e+08	1.23639e+08	1.12086e+08	1.89746e+08	1.80349e+08	1.5243e+08	1.21975e+08	1.29594e+08	1.39601e+08	1.56761e+08	1.53782e+08	2.2e+08	1.44491e+08	1.17935e+08	1.54098e+08	1.36636e+08
High	LHVDPENFR	[K].LHVDPENFR.[L]		0.00549308	0.000386037	2	2	515	P02042; P68871	P02042 [97-105]; P68871 [97-105]		0	1126.56	9	1.77643e+07	1.72267e+07	7.98642e+06	8.71487e+06	2.0087e+07	2.47898e+07	1.68594e+07	9.20602e+06	2.08621e+07	1.05231e+07	1.27531e+07	9.40065e+06	2.31307e+07	1.59171e+07	1.97125e+07	1.80389e+07	1.54105e+07	1.94696e+07	1.62904e+07	2.61997e+08	2.21694e+07	1.29546e+07	2.01296e+07	1.62666e+07	1.36725e+07	1.18626e+07	4.16434e+07	1.68005e+07	2.86491e+08	2.31336e+07	1.80962e+07	2.07141e+07	8.23898e+06	5.26075e+07	1.66843e+07
High	IHWESASLLR	[R].IHWESASLLR.[S]		0.000243626	0.000386037	1	1	1877	P01024	P01024 [1311-1320]		0	1211.65	10	1.05799e+08	1.34876e+08	8.39701e+07	1.59641e+08	1.2886e+08	1.09785e+08	1.45948e+08	1.30558e+08	1.59732e+08	1.44598e+08	1.70332e+08	1.87336e+08	1.83429e+08	1.8611e+08	1.30566e+08	1.28945e+08	1.51747e+08	1.63204e+08	1.47475e+08	1.58911e+08	2.08808e+08	2.09121e+08	1.04934e+08	1.55091e+08	1.71763e+08	1.81933e+08	1.02868e+08	2.05837e+08	1.54111e+08	1.53117e+08	1.62051e+08	1.59198e+08	1.89806e+08	2.60644e+07	1.34333e+08
High	LKPDPNTLCDEFK	[K].LKPDPNTLCDEFK.[A]	1xCarbamidomethyl [C9]	0.000341918	0.000386037	1	1	28	P02769	P02769 [139-151]		0	1576.77	13	2.33339e+06	1.18387e+06	1.96662e+06	982576	861216	648131	1.25006e+06	740739	902509	622645	897582	922842	839251	919113	689824	1.21428e+06	776331	545282	282268	429938	533245	356915	597346		399101	486823	387257	459663	384342	423647	596593	277552	648392		453863
High	LHEAFSPVSYQHDLALLR	[R].LHEAFSPVSYQHDLALLR.[L]		6.24806e-17	0.000386037	1	1	548	P00748	P00748 [449-466]		0	2096.09	18	7.39693e+06	5.75253e+06	9.79355e+06	5.60046e+06	9.91131e+06	9.18868e+06	4.08739e+06	1.0129e+07	1.22244e+07	7.45525e+06	9.4264e+06	8.98409e+06	1.12133e+07	8.03381e+06	9.89929e+06	1.12909e+07	5.78654e+06	9.39311e+06	1.22198e+07	9.22581e+06	1.02271e+07	7.04377e+06	7.08565e+06	1.04068e+07	1.53531e+07	1.05098e+07	1.06648e+07	2.69617e+06	1.09228e+07	1.21373e+07	1.07858e+07	8.1946e+06	1.24653e+07	5.74304e+06	7.5369e+06
High	LLGMETMAWQEIR	[R].LLGMETMAWQEIR.[H]	1xOxidation [M]	3.11903e-05	0.000386037	1	1	19	P06681	P06681 [356-368]		0	1593.78	13		297807		477923	175472	244414	154750	288428	93946.8	301384		247702	509371	215173	596102	215471		199446	92255.3	243980	193856	267587	218088	265059	226572	113233	266427	101434	152865	266148	166234				603146
High	LLGMETMAWQEIR	[R].LLGMETMAWQEIR.[H]	2xOxidation [M4; M7]	2.89522e-07	0.000386037	1	1	125	P06681	P06681 [356-368]		0	1609.77	13	1.70012e+06	1.79257e+06	2.11968e+06	1.75389e+06	1.79567e+06	1.18041e+06	1.42098e+06	1.50981e+06	1.44154e+06	1.74897e+06	1.62366e+06	1.54468e+06	1.45079e+06	1.64333e+06	1.55017e+06	2.13093e+06	1.71178e+06	1.60086e+06	2.02525e+06	1.54952e+06	1.60759e+06	1.60203e+06	927782	1.97367e+06	1.98768e+06	1.93582e+06	1.62308e+06	1.55412e+06	2.02088e+06	1.6056e+06	1.61564e+06	1.32263e+06	1.41374e+06	1.54047e+06	1.34945e+06
High	ILGPLSYSK	[K].ILGPLSYSK.[I]		0.00196891	0.000386037	1	1	252	P51884	P51884 [297-305]		0	977.567	9	6.62549e+06	5.91018e+06	3.08681e+06	4.57264e+06	5.07896e+06	4.42429e+06	5.623e+06	4.00413e+06	5.16069e+06	4.24935e+06	4.57163e+06	4.63246e+06	5.17273e+06	4.51701e+06	2.23647e+06	5.23064e+06	5.42784e+06	5.78022e+06	4.23751e+06	2.01336e+06	3.71971e+06	4.92915e+06	6.08084e+06	4.74412e+06	3.68242e+06	4.05325e+06	2.92128e+06	3.5914e+06	3.634e+06	4.01023e+06	4.70186e+06	4.65742e+06	4.69117e+06	5.16658e+06	5.60708e+06
High	LLIYGASSR	[R].LLIYGASSR.[A]		0.00250638	0.000386037	1	1	170	P01619	P01619 [67-75]		0	979.557	9	1.65425e+07	2.78018e+07	2.48102e+07	1.74622e+07	2.59502e+07	1.80809e+07	2.09688e+07	1.95891e+07	1.40016e+07	2.14943e+07	1.87949e+07	2.07318e+07	1.63094e+07	1.28471e+07	1.41354e+07	1.57816e+07	1.35278e+07	1.11119e+07	1.32909e+07	2.0615e+07	4.14932e+07	1.43402e+07	2.02341e+07	1.36635e+07	1.48034e+07	2.31718e+07	1.70148e+07	1.07213e+07	2.61186e+07	1.68073e+07	1.78268e+07	2.90197e+07	2.34849e+07	1.64495e+07	2.00521e+07
High	LLIYGASTR	[R].LLIYGASTR.[A]		0.00435531	0.000386037	1	2	217	P01624	P01624 [66-74]		0	993.573	9	4.08993e+07	6.92899e+07	4.09532e+07	4.07118e+07	7.14654e+07	4.16943e+07	5.48527e+07	4.32536e+07	3.31476e+07	4.94198e+07	4.02238e+07	4.60453e+07	3.43591e+07	3.26072e+07	2.37746e+07	4.63035e+07	3.37872e+07	2.75815e+07	3.04612e+07	3.63295e+07	6.2928e+07	4.07343e+07	4.72924e+07	2.70504e+07	2.9425e+07	4.37335e+07	4.49765e+07	2.94106e+07	4.4185e+07	3.66658e+07	4.08311e+07	8.18006e+07	4.88133e+07	3.98646e+07	3.62793e+07
High	LLIYWASTR	[K].LLIYWASTR.[E]		0.00256723	0.000386037	1	1	141	P06312	P06312 [72-80]		0	1122.63	9	344053	564669	367009	602048	1.33399e+06	1.12618e+06	710140	2.04075e+06	1.18188e+06	1.60704e+06	1.06696e+06	774216	480801	571055	419658	1.21296e+06	1.01191e+06	576497	623863	1.19318e+06	2.28356e+06	360761	1.04214e+06	557161	977033	1.27713e+06	1.04365e+06	701406	915301	1.13414e+06	797505	2.12641e+06	821028	1.13763e+06	1.33527e+06
High	LLIYYDDLLPSGVSDR	[K].LLIYYDDLLPSGVSDR.[F]		2.78436e-12	0.000386037	1	1	139	A0A0B4J1U3	A0A0B4J1U3 [66-81]		0	1838.95	16	585323	212981	447200	1.87237e+06	396585	4.71888e+06	443914	638846		1.52253e+06	1.28805e+06	1.06412e+06	1.24753e+06	878890	1.3183e+06	113864	1.01603e+06	143362	713447	1.03929e+06	582308	1.92111e+06	2.21685e+06	658408	1.85565e+06	679699	1.15877e+06	614702	1.10739e+06	5.38351e+06	148238	445031	1.0448e+06	3.25371e+06	6.94365e+06
High	LLPAQLPAEK	[K].LLPAQLPAEK.[E]		0.00645089	0.000386037	1	1	185	Q16610	Q16610 [91-100]		0	1079.65	10	3.47574e+06	3.30651e+06	7.07241e+06	2.49615e+06	2.61366e+06	2.42539e+06	2.39395e+06	2.47189e+06	3.75238e+06	1.93606e+06	2.59228e+06	3.39418e+06	2.76122e+06	3.13784e+06	1.53827e+06	3.50045e+06	3.62359e+06	2.9958e+06	2.04749e+06	1.84185e+06	2.66961e+06	2.85207e+06	3.02167e+06	2.67725e+06	2.58152e+06	1.9085e+06	2.58304e+06	2.53013e+06	3.31984e+06	2.25269e+06	2.74417e+06	3.31254e+06	3.04802e+06	2.21175e+06	3.12329e+06
High	LLPHANEVSQK	[R].LLPHANEVSQK.[I]		0.000110981	0.000386037	1	1	669	P06727	P06727 [113-123]		0	1235.67	11	7.67681e+07	8.57076e+07	6.79594e+07	4.99484e+07	1.04826e+08	6.90185e+07	7.09349e+07	8.55758e+07	7.16764e+07	8.63064e+07	4.81281e+07	9.35104e+07	6.46954e+07	6.09776e+07	7.7503e+07	6.71143e+07	5.76744e+07	6.14764e+07	7.521e+07	7.55831e+07	6.73264e+07	4.7349e+07	7.97209e+07	5.51115e+07	1.21354e+08	4.88421e+07	5.40133e+07	5.59798e+07	8.61503e+07	4.35264e+07	4.72387e+07	7.73634e+07	6.04367e+07	6.93137e+07	6.03367e+07
High	LLRDADDLQK	[R].LLRDADDLQK.[R]		0.0121781	0.000386037	1	1	7	P02649	P02649 [166-175]		1	1186.64	10	534376	214276	250243	705221	319124	492880	432704		686259	353804	273011	226367	433135	202001	498104	334320	464503	583286	924994	370294	2.58198e+06	475543	145226	817964	624463	891123	471348	517243	425924	278864	724436	425931	325473	759042	237730
High	IISDYHQQFR	[K].IISDYHQQFR.[Y]		1.19292e-07	0.000386037	1	1	752	P04114	P04114 [4487-4496]		0	1306.65	10	3.66648e+07	4.90483e+07	4.73602e+07	4.73192e+07	4.3953e+07	6.1196e+07	3.83391e+07	6.92995e+07	5.59484e+07	4.72111e+07	3.49514e+07	4.22219e+07	6.90964e+07	4.9104e+07	7.4987e+07	5.17112e+07	4.01104e+07	3.65889e+07	5.44924e+07	5.33648e+07	5.10466e+07	6.15772e+07	4.33273e+07	3.72788e+07	3.67929e+07	4.59107e+07	5.02806e+07	4.65336e+07	5.42497e+07	3.60573e+07	4.7404e+07	5.2324e+07	2.82995e+07	6.38126e+07	4.75009e+07
High	LLIYDASSRATGIPDR	[R].LLIYDASSRATGIPDR.[F]		0.00142132	0.000386037	1	1	24	A0A0C4DH25	A0A0C4DH25 [67-82]		1	1747.93	16
High	LISEVDSDGDGEISFQEFLTAAK	[K].LISEVDSDGDGEISFQEFLTAAK.[K]		4.45772e-06	0.000386037	1	1	1	Q9NZT1	Q9NZT1 [52-74]		0	2471.18	23									993149
High	LLSHCLLVTLAAHLPAEFTPAVHASLDK	[K].LLSHCLLVTLAAHLPAEFTPAVHASLDK.[F]	1xCarbamidomethyl [C5]	5.73653e-24	0.000386037	1	1	46	P69905	P69905 [101-128]		0	3024.63	28	202463	458374		472034	714992	1.23453e+06	191266	154038	567208	1.37901e+06	333189	13806.6	577504	566080	655486	1.08799e+06	396365	1.02844e+06	1.41442e+06	1.46988e+07	1.84741e+06	615371	703875	866390	1.03095e+06	1.17171e+06	3.40371e+06	1.4924e+06	7.74106e+06	1.45336e+06	421581	1.33848e+06		2.90005e+06	1.15003e+06
High	LLSLGAGEFK	[R].LLSLGAGEFK.[S]		0.000162617	0.000386037	1	1	20	P12259	P12259 [849-858]		0	1034.59	10	1.16266e+06	954750	1.05262e+06		1.32659e+06	583304	939382	1.28157e+06	1.04443e+06	241841	561400	998839	967651	661396	1.00993e+06			608560	808885	585162	982798	1.73437e+06	994185	1.70368e+06	476006	594869	948649	1.2587e+06	890417	1.00836e+06	588454	705823	547805	1.47759e+06	751728
High	LISVDTEHSNIYLQNGPDR	[K].LISVDTEHSNIYLQNGPDR.[I]		5.8781e-18	0.000386037	1	1	727	P00450	P00450 [44-62]		0	2171.07	19	3.90368e+07	4.87194e+07	7.71979e+07	6.64194e+07	3.91155e+07	5.26019e+07	4.41808e+07	4.19405e+07	4.20108e+07	4.36027e+07	7.60234e+07	5.6717e+07	6.67457e+07	6.60366e+07	4.40825e+07	7.4395e+07	8.2885e+07	6.36338e+07	4.45381e+07	5.77101e+07	5.54987e+07	5.36795e+07	6.78664e+07	7.24983e+07	8.81185e+07	7.36918e+07	5.58447e+07	5.52958e+07	7.95271e+07	1.0293e+08	6.50726e+07	5.3685e+07	5.24431e+07	3.91106e+07	6.5679e+07
High	LISWYDNEFGYSNR	[K].LISWYDNEFGYSNR.[V]		9.61794e-05	0.000386037	1	1	2	P04406	P04406 [310-323]		0	1763.8	14	406896		226355	560255						1.49421e+06		214896		124883	218678				217777	186018	187780		373075		401148									913290	4.23878e+06
High	ILTATVDNANVLLQIDNAR	[K].ILTATVDNANVLLQIDNAR.[L]		0.00010425	0.000386037	1	1	4	P02533	P02533 [176-194]		0	2054.12	19					326111	201038				644557
High	LIVAMSSWLQK	[K].LIVAMSSWLQK.[A]		1.35454e-05	0.000386037	1	1	59	P04114	P04114 [1230-1240]		0	1275.71	11		196118		498313	296000	603252		647638	344545	531132			484720	396673	298614	520945	157098	273056	416933	1.6597e+06	362596	497018	238675	200287	166458	372396	375784	400492	1.83286e+06		158103	558114	224439	687265
High	LLVVYPWTQR	[R].LLVVYPWTQR.[F]		2.15637e-05	0.000386037	2	5	330	P02042; P68871	P02042 [32-41]; P68871 [32-41]		0	1274.73	10	3.4198e+06	5.50168e+06	1.45568e+06	2.56426e+06	5.32295e+06	5.68173e+06	3.68987e+06	2.69027e+06	5.52383e+06	2.94034e+06	3.3933e+06	1.82936e+06	6.78375e+06	4.00574e+06	4.80698e+06	4.84235e+06	3.12939e+06	5.70315e+06	4.55694e+06	7.97991e+07	6.19186e+06	3.19958e+06	5.33111e+06	3.85652e+06	3.05318e+06	3.62937e+06	1.21702e+07	4.02565e+06	7.66307e+07	6.66295e+06	3.91631e+06	6.14277e+06	2.16616e+06	1.19376e+07	3.90124e+06
High	LLVYYIVTGEQTAELVSDSVWLNIEEK	[R].LLVYYIVTGEQTAELVSDSVWLNIEEK.[C]		6.17261e-07	0.000386037	1	1	2	P01031	P01031 [540-566]		0	3111.61	27
High	LLSGGNTLHLVSTTK	[K].LLSGGNTLHLVSTTK.[T]		6.11198e-10	0.000386037	1	1	396	P04114	P04114 [935-949]		0	1540.87	15	2.24618e+07	3.39971e+07	2.96594e+07	3.1042e+07	2.58102e+07	2.99855e+07	1.9801e+07	3.89303e+07	3.15818e+07	2.09753e+07	2.00296e+07	2.26164e+07	3.99157e+07	2.98787e+07	3.01735e+07	3.09375e+07	2.4989e+07	2.37801e+07	2.23398e+07	1.8918e+07	2.79622e+07	3.2037e+07	2.3329e+07	2.15832e+07	1.80584e+07	2.71492e+07	2.02154e+07	3.05843e+07	2.51281e+07	1.95985e+07	2.1491e+07	3.10827e+07	2.11489e+07	3.07222e+07	2.84657e+07
High	LSNENHGIAQR	[R].LSNENHGIAQR.[I]		1.79675e-07	0.000386037	1	1	465	P19823	P19823 [465-475]		0	1238.62	11	1.91501e+07	1.53654e+07	1.8745e+07	2.29903e+07	1.23198e+07	1.59019e+07	8.4355e+06	2.14423e+07	1.77672e+07	8.0637e+06	1.70066e+07	2.13313e+07	2.01238e+07	1.44182e+07	1.02537e+07	1.48596e+07	1.81512e+07	1.46503e+07	2.00415e+07	1.65962e+07	8.78694e+06	1.17993e+07	2.15449e+07	1.63766e+07	1.61203e+07	1.94422e+07	2.0787e+07	1.61035e+07	1.5188e+07	2.19033e+07	1.51306e+07	1.69128e+07	1.88337e+07	7.72205e+06	1.46503e+07
High	LLIYDASSR	[R].LLIYDASSR.[A]		0.000277665	0.000386037	1	1	473	A0A0C4DH25	A0A0C4DH25 [67-75]		0	1037.56	9	2.16939e+07	2.3612e+07	2.91353e+07	3.42306e+07	2.90975e+07	1.80112e+07	3.0635e+07	2.99031e+07	1.15002e+07	2.46694e+07	2.17855e+07	4.54587e+07	1.26602e+07	3.12531e+07	1.00736e+07	2.60588e+07	1.74797e+07	1.11561e+07	1.25012e+07	1.94998e+07	3.78732e+07	1.4609e+07	2.84081e+07	1.38846e+07	1.55312e+07	2.06134e+07	1.62631e+07	1.69399e+07	2.9504e+07	2.25571e+07	1.69771e+07	2.46626e+07	2.70936e+07	2.60563e+07	4.73316e+07
High	LLIYDASNRATGIPAR	[R].LLIYDASNRATGIPAR.[F]		0.00611536	0.000386037	1	2	2	A0A0A0MRZ8	A0A0A0MRZ8 [66-81]		1	1730.95	16		1.27976e+06		159014																		212515
High	LLLFSPSVVHLGVPLSVGVQLQDVPR	[R].LLLFSPSVVHLGVPLSVGVQLQDVPR.[G]		6.49699e-17	0.000386037	2	2	373	P0C0L4; P0C0L5	P0C0L4 [23-48]; P0C0L5 [23-48]		0	2769.6	26	9.6229e+06	1.68328e+07	9.27856e+06	2.14232e+07	7.73589e+06	2.15006e+07	5.77623e+06	1.00563e+07	7.1616e+06	1.71488e+07	7.74457e+06	2.8919e+06	4.75265e+06	7.16448e+06	7.48951e+06	6.46716e+06	7.37353e+06	1.45729e+07	1.37385e+07	5.62608e+06	9.93199e+06	6.41075e+06	1.21928e+06	5.45849e+06	1.21923e+07	9.95984e+06	7.67295e+06	7.25792e+06	2.05353e+06	7.0057e+06	3.72201e+06	4.67667e+06	4.57852e+06	8.95855e+06	2.77583e+07
High	ILIGTVFHK	[K].ILIGTVFHK.[AT]		0.00113775	0.000386037	2	2	498	P27169; Q15166	P27169 [341-349]; Q15166 [340-348]		0	1027.63	9	1.16994e+07	1.02618e+07	2.00608e+07	1.59114e+07	1.97492e+07	2.0508e+07	9.41461e+06	1.57825e+07	1.7199e+07	1.56715e+07	1.37339e+07	2.01738e+07	1.93174e+07	1.67896e+07	2.14579e+07	1.75979e+07	2.56832e+07	1.90336e+07	1.66034e+07	2.83751e+07	1.47975e+07	1.74753e+07	3.09067e+07	1.74905e+07	1.8105e+07	2.42914e+07	2.65384e+07	2.19899e+07	2.67731e+07	3.2116e+07	1.71624e+07	2.39244e+07	1.86034e+07	1.48605e+07	1.46045e+07
High	LLLLDLSHNSLLALEPGILDTANVEALR	[R].LLLLDLSHNSLLALEPGILDTANVEALR.[L]		0.00706681	0.000386037	1	1	1	Q6EMK4	Q6EMK4 [171-198]		0	3013.69	28
High	ILLMDLNEEDPTVLELGITGSK	[K].ILLMDLNEEDPTVLELGITGSK.[F]		2.9888e-19	0.000386037	1	1	347	P27169	P27169 [85-106]		0	2400.26	22	1.23705e+06	4.30499e+06	2.85631e+06	4.38247e+06	3.47932e+06	6.74957e+06	3.01453e+06	4.33838e+06	3.61434e+06	3.69728e+06	2.67082e+06	2.53427e+06	4.09989e+06	3.94812e+06	6.88735e+06	3.99319e+06	3.15368e+06	4.54999e+06	4.63756e+06	5.56494e+06	3.35578e+06	3.76987e+06	5.76064e+06	3.83966e+06	4.46503e+06	5.42101e+06	7.75509e+06	3.69678e+06	2.29576e+06	6.09682e+06	2.98614e+06	2.62195e+06	2.34561e+06	4.91677e+06	5.54969e+06
High	ILLMDLNEEDPTVLELGITGSK	[K].ILLMDLNEEDPTVLELGITGSK.[F]	1xOxidation [M4]	8.15346e-20	0.000386037	1	1	143	P27169	P27169 [85-106]		0	2416.25	22	2.22834e+06	7.91735e+06	8.34514e+06	2.79809e+06	6.37163e+06	1.01712e+07	5.47622e+06	5.55718e+06	5.24897e+06	5.79379e+06	3.56893e+06	1.78118e+06	7.6014e+06	6.58979e+06	9.96782e+06	6.34341e+06	5.58014e+06	2.84404e+06	6.68084e+06	3.20667e+06	951641	4.82555e+06	1.29853e+07	2.55598e+06	5.21661e+06	5.70882e+06	1.58795e+07	6.76954e+06	5.96497e+06	1.52986e+07	7.39868e+06	3.02205e+06	1.79201e+06	6.63728e+06	9.40103e+06
High	ILLQGTPVAQMTEDAVDAER	[R].ILLQGTPVAQMTEDAVDAER.[L]		1.92109e-16	0.000386037	1	1	1219	P01024	P01024 [980-999]		0	2157.09	20	3.51323e+07	2.6134e+07	2.06832e+07	2.47766e+07	2.15979e+07	2.66095e+07	2.28728e+07	2.60696e+07	2.95912e+07	2.50959e+07	2.54133e+07	2.75637e+07	2.43369e+07	3.13968e+07	2.3831e+07	1.9934e+07	2.42833e+07	2.23657e+07	1.84323e+07	2.62924e+07	3.29822e+07	2.85943e+07	1.69051e+07	2.02474e+07	2.25394e+07	1.61917e+07	2.60134e+07	3.05214e+07	1.13044e+07	2.29065e+07	1.75172e+07	2.35105e+07	2.61664e+07	2.51269e+07	2.60614e+07
High	ILLQGTPVAQMTEDAVDAER	[R].ILLQGTPVAQMTEDAVDAER.[L]	1xOxidation [M11]	1.8206e-14	0.000386037	1	1	1418	P01024	P01024 [980-999]		0	2173.08	20	6.95068e+07	7.94039e+07	6.10428e+07	6.66258e+07	6.81229e+07	5.16352e+07	5.81977e+07	5.35915e+07	5.96873e+07	6.70897e+07	5.6174e+07	1.07981e+08	7.62566e+07	6.44526e+07	6.50046e+07	7.5619e+07	6.89505e+07	6.09152e+07	8.8154e+07	5.50035e+07	6.73595e+07	6.68621e+07	3.93932e+07	5.88158e+07	7.94041e+07	7.56074e+07	7.62838e+07	6.15053e+07	6.89307e+07	5.57467e+07	5.30816e+07	4.42728e+07	5.81906e+07	5.06221e+07	5.60523e+07
High	ILLQGTPVAQMTEDAVDAERLK	[R].ILLQGTPVAQMTEDAVDAERLK.[H]		6.023e-08	0.000386037	1	1	5	P01024	P01024 [980-1001]		1	2398.26	22
High	LLIYDASSLESGVPSR	[K].LLIYDASSLESGVPSR.[F]		2.19178e-10	0.000386037	1	1	65	A0A0B4J2D9	A0A0B4J2D9 [68-83]		0	1706.9	16			1.0994e+06			1.19162e+07		350981	1.65623e+07		169450	1.58882e+07	7.32254e+06		431308					4.63386e+06		9.47437e+06	400152		895673				5.03319e+06						2.10142e+06
High	ILLQGTPVAQMTEDAVDAERLK	[R].ILLQGTPVAQMTEDAVDAERLK.[H]	1xOxidation [M11]	1.50481e-08	0.000386037	1	1	37	P01024	P01024 [980-1001]		1	2414.26	22		225416								2.53324e+06						276557			309869			163041							3.11308e+06
High	LLLQMDSSATAYGSTVSK	[K].LLLQMDSSATAYGSTVSK.[R]	1xOxidation [M5]	1.07438e-14	0.000386037	1	1	494	P04114	P04114 [1146-1163]		0	1887.94	18	7.62345e+06	1.76725e+07	1.89288e+07	1.58285e+07	1.2693e+07	1.58146e+07	1.12686e+07	1.61248e+07	1.68038e+07	1.22187e+07	1.10081e+07	1.18775e+07	1.87367e+07	1.65942e+07	1.90584e+07	1.99099e+07	1.62554e+07	1.32778e+07	1.56843e+07	1.36904e+07	1.48038e+07	1.78352e+07	1.22154e+07	1.05083e+07	9.0066e+06	1.43986e+07	1.67281e+07	1.82164e+07	1.66183e+07	7.87267e+06	1.39298e+07	1.58689e+07	9.70639e+06	1.70699e+07	1.55158e+07
High	LLLQQVSLPELPGEYSMK	[R].LLLQQVSLPELPGEYSMK.[V]		2.44638e-13	0.000386037	1	1	214	P01023	P01023 [1298-1315]		0	2045.1	18
High	LLLQQVSLPELPGEYSMK	[R].LLLQQVSLPELPGEYSMK.[V]	1xOxidation [M17]	1.44719e-12	0.000386037	1	1	923	P01023	P01023 [1298-1315]		0	2061.09	18	1.82806e+08	2.0324e+08	1.28432e+08	1.80909e+08	1.52592e+08	1.34945e+08	1.49316e+08	9.70147e+07	1.90309e+08	1.13735e+08	2.53632e+08	1.14762e+08	1.58317e+08	1.25129e+08	1.10965e+08	1.75049e+08	1.72007e+08	1.70504e+08	1.18097e+08	1.65689e+08	1.08682e+08	9.63063e+07	1.98319e+08	1.50326e+08	1.58654e+08	1.17196e+08	1.30989e+08	1.27026e+08	1.75617e+08	1.72908e+08	2.00106e+08	1.21431e+08	1.18781e+08	1.57092e+08	1.59233e+08
High	LLIYAASSLQSGVPSR	[K].LLIYAASSLQSGVPSR.[F]		1.78969e-09	0.000386037	1	4	89	A0A0C4DH72	A0A0C4DH72 [68-83]		0	1661.92	16		743156		518544	553272	339481	662387	409846		1.09398e+06	372496	158303	273896				538617	506568	163455	546508	1.73663e+06	268574			254729	871542	924834		343139	707607	317337	1.36662e+06	909901	170031	429609
High	LLIYAASTLQSGVPSR	[K].LLIYAASTLQSGVPSR.[F]		3.03272e-09	0.000386037	1	3	82	A0A0C4DH67	A0A0C4DH67 [66-81]		0	1675.94	16		343853		305079	253124	255730	381139	333839		645927	482290		225121	280157			193565	186834	390442	300839	672655	152094	326506	141767	130416	357461	447275	224650	190094	392971	271650	396872	383866	197011	329190
High	LLIYAVLPTGDVIGDSAK	[R].LLIYAVLPTGDVIGDSAK.[Y]		5.54339e-14	0.000386037	1	1	642	P01023	P01023 [540-557]		0	1845.04	18	8.37046e+07	1.22234e+08	6.76484e+07	1.18313e+08	9.87115e+07	8.76605e+07	1.18779e+08	6.33271e+07	1.24757e+08	9.18051e+07	1.33703e+08	6.77587e+07	1.08786e+08	1.05787e+08	9.32834e+07	1.45485e+08	1.14108e+08	1.43259e+08	8.97099e+07	1.18521e+08	1.02059e+08	8.67533e+07	1.76875e+08	1.31761e+08	1.44843e+08	1.09439e+08	1.30428e+08	1.24558e+08	1.21748e+08	1.37936e+08	2.00037e+08	1.00687e+08	7.93728e+07	1.53182e+08	1.3737e+08
High	LLIYDASNLETGVPSR	[K].LLIYDASNLETGVPSR.[F]		6.73924e-14	0.000386037	1	1	633	P01593	P01593 [68-83]		0	1747.92	16	1.11698e+07	1.72483e+07	1.26493e+07	2.06457e+07	1.08763e+07	1.52086e+07	1.63527e+07	1.1617e+07	5.97492e+06	1.26461e+07	1.59204e+07	1.51967e+07	1.23579e+07	1.39416e+07	1.2274e+07	6.53163e+06	1.04513e+07	5.29589e+06	1.03617e+07	1.4932e+07	2.01891e+07	1.18028e+07	1.67042e+07	1.03355e+07	1.141e+07	1.27251e+07	1.45133e+07	1.03436e+07	1.15908e+07	7.60801e+06	7.68411e+06	1.34573e+07	1.3385e+07	2.16354e+07	1.87123e+07
High	LLIYDASNR	[R].LLIYDASNR.[A]		0.00159388	0.000386037	1	2	975	A0A0A0MRZ8	A0A0A0MRZ8 [66-74]		0	1064.57	9	1.00221e+08	9.32176e+07	4.84138e+07	7.33646e+07	1.11678e+08	6.71147e+07	1.08984e+08	8.90627e+07	5.09794e+07	6.98483e+07	7.37703e+07	1.0113e+08	3.71328e+07	8.56746e+07	5.65369e+07	5.86121e+07	6.54578e+07	4.53357e+07	4.76077e+07	7.97184e+07	1.0717e+08	5.89389e+07	1.0631e+08	5.45281e+07	3.81667e+07	5.2809e+07	9.47553e+07	4.60947e+07	9.96942e+07	7.6215e+07	7.50512e+07	7.97281e+07	4.97784e+07	6.41454e+07	1.27087e+08
High	LLLQMDSSATAYGSTVSK	[K].LLLQMDSSATAYGSTVSK.[R]		5.9939e-14	0.000386037	1	1	155	P04114	P04114 [1146-1163]		0	1871.94	18	1.24607e+06	2.43862e+06	1.60849e+06	2.57938e+06	2.4087e+06	3.90308e+06	2.17647e+06	4.75625e+06	3.19538e+06	3.07406e+06	1.7219e+06	1.40165e+06	4.08727e+06	3.85132e+06	4.04312e+06	2.76583e+06	2.32752e+06	2.59073e+06	2.26277e+06	3.77986e+06	2.99137e+06	3.72985e+06	3.10589e+06	2.52271e+06	1.65027e+06	1.78141e+06	2.87309e+06	4.60704e+06	1.74651e+06	1.39222e+06	1.46885e+06	3.04553e+06	1.85948e+06	4.07388e+06	3.40159e+06
High	ISNIPDEYFK	[K].ISNIPDEYFK.[R]		3.54689e-05	0.000386037	1	1	68	P51884	P51884 [217-226]		0	1225.61	10	7.13297e+06	7.0376e+06	2.97464e+06	5.70725e+06	6.16306e+06	5.74686e+06	6.0854e+06	4.90978e+06	5.77676e+06	4.64431e+06	6.75852e+06	8.00436e+06	7.07973e+06	7.08485e+06	4.36951e+06	8.10118e+06	9.09713e+06	9.185e+06	5.49352e+06	3.23547e+06	5.16757e+06	6.88144e+06	9.16228e+06	6.85831e+06	6.60982e+06	6.03719e+06	6.07286e+06	5.04104e+06	6.2678e+06	6.08823e+06	8.20222e+06	7.2471e+06	5.716e+06	6.34836e+06	6.47907e+06
High	LSNNALSGLPQGVFGK	[K].LSNNALSGLPQGVFGK.[L]		8.21283e-09	0.000386037	1	1	175	P22792	P22792 [200-215]		0	1601.86	16	1.71517e+06	2.46772e+06	1.4255e+06	2.25984e+06	2.48415e+06	2.54374e+06	2.46901e+06	3.42845e+06	2.9656e+06	2.49492e+06	2.01102e+06	1.74922e+06	2.45775e+06	1.75351e+06	2.53869e+06	2.42477e+06	1.78389e+06	1.89432e+06	2.79631e+06	2.01328e+06	2.60556e+06	2.30927e+06	2.7852e+06	3.56905e+06	1.92181e+06	2.96367e+06	2.63636e+06	2.11607e+06	2.04763e+06	2.38031e+06	1.89956e+06	2.64997e+06	3.83399e+06	3.01321e+06	2.31218e+06
High	LSNVLQQVK	[K].LSNVLQQVK.[I]		0.000258975	0.000386037	1	1	311	P04114	P04114 [2377-2385]		0	1028.61	9	2.48769e+07	4.07324e+07	4.1756e+07	3.47806e+07	3.28882e+07	4.97542e+07	2.63453e+07	4.74849e+07	4.10848e+07	3.36786e+07	2.4969e+07	3.04135e+07	4.83115e+07	3.79998e+07	5.59421e+07	3.75209e+07	3.38048e+07	2.91151e+07	4.18839e+07	3.062e+07	3.27749e+07	4.59076e+07	3.09726e+07	2.87792e+07	2.50531e+07	3.30161e+07	3.45788e+07	3.87571e+07	4.03094e+07	2.46842e+07	3.08666e+07	4.06069e+07	2.56059e+07	4.18728e+07	3.7525e+07
High	MESLGITSR	[K].MESLGITSR.[D]	1xOxidation [M1]	0.00384371	0.000386037	1	1	257	P07357	P07357 [362-370]		0	1009.5	9	1.16068e+07	6.73803e+06	9.65495e+06	9.74901e+06	7.17803e+06	6.79278e+06	6.65308e+06	5.90812e+06	5.77993e+06	5.9044e+06	6.28924e+06	7.86369e+06	5.72141e+06	4.82537e+06	6.0752e+06	7.71424e+06	7.0727e+06	5.76721e+06	7.17312e+06	4.03254e+06	5.17326e+06	6.89431e+06	7.13257e+06	6.91251e+06	6.32433e+06	6.78837e+06	5.38717e+06	5.53406e+06	6.49731e+06	5.37384e+06	5.07512e+06	4.62982e+06	6.03434e+06	6.35801e+06	5.62376e+06
High	MFGNLQGLTMHVGDEVNWYLMGMGNEIDLHTVHFHGHSFQYK	[R].MFGNLQGLTMHVGDEVNWYLMGMGNEIDLHTVHFHGHSFQYK.[H]	3xOxidation [M10; M21; M]	0.0112325	0.000386037	1	1	6	P00450	P00450 [965-1006]		0	4938.23	42			250560	107838	238418		639115	376476		434405	416182			264873	96110.9	232419		157899	289406	469298	483468	658488	105131	334018	435006	392051	810595	629051		209233	254766	225225	121043	384951	99162.9
High	MFIFAILPDGEVVGDSEK	[R].MFIFAILPDGEVVGDSEK.[F]		4.64957e-10	0.000386037	1	1	14	P20742	P20742 [536-553]		0	1966.98	18	140517		1.56215e+06													89991.9	329304			1.84028e+06				231365		413734			1.29324e+06	581529
High	MFIFAILPDGEVVGDSEK	[R].MFIFAILPDGEVVGDSEK.[F]	1xOxidation [M1]	1.32947e-05	0.000386037	1	1	10	P20742	P20742 [536-553]		0	1982.98	18			557378																	167162					276725				456317
High	MFLSFPTTK	[R].MFLSFPTTK.[T]		0.00355349	0.000386037	1	1	196	P69905	P69905 [33-41]		0	1071.55	9	1.17047e+06	1.20297e+06	415034	874901	1.5358e+06	2.72256e+06	1.75241e+06	1.36371e+06	2.00506e+06	1.06835e+06	1.07133e+06	921003	2.27832e+06	1.56688e+06	1.5278e+06	1.68013e+06	964665	1.9284e+06	1.1562e+06	3.6169e+07	2.15547e+06	1.57909e+06	2.20108e+06	2.04082e+06	1.43149e+06	1.07936e+06	5.42128e+06	2.0797e+06	2.71225e+07	2.54084e+06	1.38033e+06	2.35668e+06	830525	7.47724e+06	1.90482e+06
High	MFLSFPTTK	[R].MFLSFPTTK.[T]	1xOxidation [M1]	0.000229162	0.000386037	1	1	458	P69905	P69905 [33-41]		0	1087.55	9	6.83251e+06	7.28807e+06	2.95217e+06	3.86379e+06	8.26824e+06	8.68547e+06	5.91301e+06	3.31439e+06	7.84731e+06	3.77682e+06	5.72116e+06	3.26589e+06	8.96951e+06	6.28867e+06	6.92437e+06	7.50275e+06	6.12154e+06	8.34958e+06	7.63034e+06	1.09285e+08	8.03324e+06	5.16568e+06	9.5749e+06	7.11543e+06	6.01117e+06	4.62511e+06	1.93775e+07	7.97522e+06	1.55281e+08	9.27616e+06	6.63871e+06	7.99147e+06	3.49652e+06	1.75224e+07	6.78721e+06
High	MFQNFPTELLLSLAVEPLTANFHK	[R].MFQNFPTELLLSLAVEPLTANFHK.[W]	1xOxidation [M1]	0.000126858	0.000386037	1	1	6	Q92820	Q92820 [173-196]		0	2776.44	24		84484.6		62526.4						56090.5								36075.5	29239.6			92362.5		66375.5		27017.7				70632.8					105735
High	MFTTAPDQVDK	[R].MFTTAPDQVDK.[E]	1xOxidation [M1]	8.88536e-06	0.000386037	1	1	281	P00450	P00450 [599-609]		0	1268.58	11	8.11182e+06	1.69992e+06	3.86305e+06	2.43117e+06	1.42942e+06	1.97804e+06	1.27381e+06	1.08089e+06	1.49716e+06	836357	1.53702e+06	1.40509e+06	1.25205e+06	1.33649e+06	1.77151e+06	1.83607e+06	1.52964e+06	1.01493e+06	1.5677e+06	1.71763e+06	777670	1.14007e+06	1.71838e+06	1.80471e+06	2.42603e+06	1.56279e+06	1.39671e+06	777131	2.49343e+06	2.38543e+06	1.76856e+06	1.06206e+06	728935	3.45159e+06	1.53885e+06
High	MFTTAPDQVDKEDEDFQESNK	[R].MFTTAPDQVDKEDEDFQESNK.[M]		7.2337e-13	0.000386037	1	1	188	P00450	P00450 [599-619]		1	2474.07	21	3.11192e+07	2.34037e+07	3.28055e+07	3.43375e+07	2.39045e+07	2.81468e+07	3.02052e+07	3.87324e+07	3.0459e+07	2.13262e+07	3.18369e+07	3.41584e+07	2.75723e+07	3.00913e+07	1.81861e+07	2.18606e+07	2.5954e+07	2.68344e+07	1.66389e+07	3.39545e+07	2.84027e+07	3.00038e+07	3.29922e+07	3.08225e+07	3.55121e+07	2.25558e+07	2.26496e+07	2.54355e+07	2.45147e+07	4.59271e+07	2.52017e+07	3.22872e+07	3.12138e+07	2.52549e+07	3.56558e+07
High	MFTTAPDQVDKEDEDFQESNK	[R].MFTTAPDQVDKEDEDFQESNK.[M]	1xOxidation [M1]	2.26257e-17	0.000386037	1	1	707	P00450	P00450 [599-619]		1	2490.06	21	6.47107e+07	6.23427e+07	1.16788e+08	1.00494e+08	6.17408e+07	5.74131e+07	7.08583e+07	5.75193e+07	3.31874e+07	2.57471e+07	4.35984e+07	3.74701e+07	5.35266e+07	3.24678e+07	3.41986e+07	5.01923e+07	8.42785e+07	6.44553e+07	5.34917e+07	7.59526e+07	3.02103e+07	5.35767e+07	3.51296e+07	6.53403e+07	9.20054e+07	8.49219e+07	3.66085e+07	3.00857e+07	5.4193e+07	6.43106e+07	7.95555e+07	6.01254e+07	5.74551e+07	2.56885e+07	7.29556e+07
High	MGDHLALEDYLTTDLVETWLR	[K].MGDHLALEDYLTTDLVETWLR.[N]		9.03343e-10	0.000386037	1	1	54	Q9UK55	Q9UK55 [306-326]		0	2491.22	21	210656		186140	150750		185160						155650	287046	210003	175838				115261	158446	198107	134591	114820		241586			125129		125542			23740.1	228713
High	MGDHLALEDYLTTDLVETWLR	[K].MGDHLALEDYLTTDLVETWLR.[N]	1xOxidation [M1]	1.89775e-13	0.000386037	1	1	95	Q9UK55	Q9UK55 [306-326]		0	2507.21	21	264829	711043	294832	967860	1.01014e+06	1.04777e+06	820390	824539	898933	2.51118e+06	841117	326920	683815	509006	875450	1.16193e+06	427516	880732	1.56182e+06	1.29987e+06	869867	710499	576652	727823	1.53592e+06	1.06696e+06	1.10023e+06	955670	535579	879439	433202	319134	1.35088e+06	944400	958908
High	MGLAFESTK	[K].MGLAFESTK.[S]		0.000470017	0.000386037	1	1	145	P04114	P04114 [306-314]		0	983.487	9	2.63934e+06	3.20008e+06	2.98738e+06	3.61393e+06	3.435e+06	5.87293e+06	3.57263e+06	7.89608e+06	5.2683e+06	4.02559e+06	2.78137e+06	3.90772e+06	6.04358e+06	4.93006e+06	4.48825e+06	3.69958e+06	3.21114e+06	3.55313e+06	2.60009e+06	3.93033e+06	3.82367e+06	6.51435e+06	4.50926e+06	3.85799e+06	2.95166e+06	2.1508e+06	2.9311e+06	5.27066e+06	3.1824e+06	2.95391e+06	2.97146e+06	5.84012e+06	3.48761e+06	7.3936e+06	5.27801e+06
High	MGLAFESTK	[K].MGLAFESTK.[S]	1xOxidation [M1]	0.000552721	0.000386037	1	1	301	P04114	P04114 [306-314]		0	999.482	9								3.134e+07												2.23828e+07		2.73474e+07	1.60763e+07						2.50613e+07	1.47763e+07	2.17541e+07	2.55428e+07		2.69549e+07	2.19549e+07
High	MGIQHAYSENADFSGLTEDNGLK	[K].MGIQHAYSENADFSGLTEDNGLK.[L]		9.5089e-13	0.000386037	1	1	144	P05543	P05543 [323-345]		0	2497.13	23	1.70652e+06	1.49096e+06	1.61983e+06	1.42751e+06	2.2026e+06	2.31348e+06	2.04012e+06	1.88118e+06	2.02518e+06	2.08072e+06	2.15818e+06	2.32132e+06	2.06506e+06	1.96952e+06	1.89684e+06	1.63358e+06	1.78878e+06	2.97096e+06	1.36713e+06	2.51859e+06	2.04484e+06	2.29526e+06	2.38098e+06	2.33095e+06	2.42988e+06	1.1067e+06	1.56306e+06	2.03034e+06	1.55056e+06	2.44495e+06	1.56584e+06	2.34776e+06	2.14744e+06	2.31134e+06	2.61204e+06
High	MGIQHAYSENADFSGLTEDNGLK	[K].MGIQHAYSENADFSGLTEDNGLK.[L]	1xOxidation [M1]	1.1504e-14	0.000386037	1	1	224	P05543	P05543 [323-345]		0	2513.12	23	4.2611e+06	4.86546e+06	6.65103e+06	5.38892e+06	4.74574e+06	5.06855e+06	5.18834e+06	3.02274e+06	4.25227e+06	4.74163e+06	6.81922e+06	6.34577e+06	5.04911e+06	5.49543e+06	4.76324e+06	6.96455e+06	6.18748e+06	7.4354e+06	5.31085e+06	5.0476e+06	4.91546e+06	6.53317e+06	6.10785e+06	6.61042e+06	9.30944e+06	7.01751e+06	4.28496e+06	5.36937e+06	8.83871e+06	7.60364e+06	6.46275e+06	5.49598e+06	4.31089e+06	6.14244e+06	6.19315e+06
High	MGPTELLIEMEDWK	[R].MGPTELLIEMEDWK.[G]		9.14457e-13	0.000386037	1	1	531	P02675	P02675 [335-348]		0	1691.8	14	2.15346e+07	1.40647e+07	1.29043e+07	2.68271e+07	1.5161e+07	2.29994e+07	1.9023e+07	1.94427e+07	1.97917e+07	2.48809e+07	2.61684e+07	1.55883e+07	3.08222e+07	2.44541e+07	2.45415e+07	1.64206e+07	1.59978e+07	2.10845e+07	1.52071e+07	2.15451e+07	2.15523e+07	2.63699e+07	2.11037e+07	2.90692e+07	1.57947e+07	1.31212e+07	2.30036e+07	2.52811e+07	7.52358e+06	1.6469e+07	1.21998e+07	1.6917e+07	2.16934e+07	1.42251e+07	2.42528e+07
High	MESLGITSR	[K].MESLGITSR.[D]		0.00422167	0.000386037	1	1	99	P07357	P07357 [362-370]		0	993.503	9	1.13397e+06	668237	823731	942337	1.25139e+06	1.15986e+06	1.16057e+06	1.28634e+06	1.20614e+06	1.10486e+06	1.15524e+06	1.34586e+06	909352	1.03071e+06	1.01937e+06	830859	761933	1.1612e+06	691379	1.00281e+06	823713	1.42802e+06	1.14805e+06	1.28025e+06	1.10909e+06		847024	880613	668870	1.20536e+06	585034	826002	1.577e+06	1.45271e+06	1.32912e+06
High	MENAELDVPIQSVFTR	[K].MENAELDVPIQSVFTR.[D]	1xOxidation [M1]	3.38252e-07	0.000386037	1	1	18	P07996	P07996 [174-189]		0	1864.91	16	144765	219346		274519	262273	125345	175125	214910	160799	151713	159298	163897				137766		276429	137641	293094		138666	207721	710304	418856	218686	387583	473779	284570	414169	158379			282231	165953
High	MELERPGGNEITR	[R].MELERPGGNEITR.[G]	1xOxidation [M1]	1.98381e-05	0.000386037	1	1	1222	P02671	P02671 [259-271]		0	1517.74	13	2.68962e+08	1.8083e+08	2.56572e+08	2.60083e+08	1.88365e+08	1.98365e+08	2.5305e+08	1.97826e+08	2.57165e+08	2.47414e+08	2.44521e+08	1.97793e+08	1.6498e+08	1.54361e+08	1.84254e+08	2.00525e+08	2.54213e+08	1.87636e+08	2.41832e+08	2.21334e+08	2.37145e+08	2.43576e+08	1.69073e+08	1.8173e+08	2.01496e+08	3.25623e+08	2.40342e+08	1.73112e+08	2.65533e+08	2.09988e+08	2.66855e+08	2.16429e+08	2.38368e+08	1.17926e+08	2.01347e+08
High	MELERPGGNEITR	[R].MELERPGGNEITR.[G]		6.83199e-05	0.000386037	1	1	491	P02671	P02671 [259-271]		0	1501.74	13	6.89123e+07	4.29581e+07	5.36393e+07	5.75734e+07	4.27825e+07	6.12535e+07	6.79505e+07	6.98069e+07	7.42176e+07	5.9847e+07	6.2411e+07	6.07802e+07	4.53537e+07	5.63724e+07	4.65035e+07	4.2699e+07	5.3489e+07	5.87858e+07	4.25246e+07	7.88046e+07	5.98371e+07	6.84705e+07	5.06965e+07	6.28325e+07	4.68944e+07	4.73896e+07	5.04199e+07	7.02889e+07	4.12536e+07	5.57401e+07	4.27868e+07	7.53243e+07	8.24358e+07	3.58721e+07	7.64209e+07
High	IYSLWEHSTK	[R].IYSLWEHSTK.[N]		1.2807e-05	0.000386037	1	1	184	P04114	P04114 [3559-3568]		0	1263.64	10	5.06263e+07	5.54051e+07	6.85553e+07	4.15444e+07	5.12745e+07	5.23382e+07	4.21148e+07	6.0356e+07	6.60914e+07	4.92036e+07	3.81186e+07	4.11643e+07	5.88486e+07	5.49051e+07	4.34957e+07	4.33682e+07	4.99629e+07	4.48858e+07	3.68785e+07	3.52008e+07	4.33383e+07	5.74339e+07	4.47344e+07	3.97005e+07	3.04726e+07	3.96239e+07	3.28448e+07	4.83158e+07	4.86411e+07	2.94597e+07	5.06788e+07	5.31031e+07	3.43011e+07	5.00687e+07	4.60108e+07
High	IYTSPTWSAFVTDSSWSAR	[R].IYTSPTWSAFVTDSSWSAR.[K]		2.01719e-12	0.000386037	1	1	48	Q08380	Q08380 [408-426]		0	2162.02	19	394318	880366	321166		598745		181693	229582	527825	400807	174377		256469	374978		350520		1.20343e+06	358680	374784	482850	316209		300272		1.28877e+06	485409	183298	177091	828898	354732	265370		901155	197567
High	MADEAGSEADHEGTHSTK	[K].MADEAGSEADHEGTHSTK.[R]		3.27944e-21	0.000386037	1	1	699	P02671	P02671 [603-620]		0	1872.77	18	2.80215e+07	1.22503e+07	2.15887e+07	2.69183e+07	1.15881e+07	1.72515e+07	1.98403e+07	1.81645e+07	2.35868e+07	1.99382e+07	2.0513e+07	1.83808e+07	2.12425e+07	2.01921e+07	1.69713e+07	1.26097e+07	1.72164e+07	2.04316e+07	1.37882e+07	3.58412e+07	1.77496e+07	2.52866e+07	2.26724e+07	2.70958e+07	1.52108e+07	9.84353e+06	1.59401e+07	1.99218e+07	1.45365e+07	2.18351e+07	1.46408e+07	2.63528e+07	2.88664e+07	1.40135e+07	2.53969e+07
High	MADEAGSEADHEGTHSTK	[K].MADEAGSEADHEGTHSTK.[R]	1xOxidation [M1]	9.41672e-17	0.000386037	1	1	1067	P02671	P02671 [603-620]		0	1888.76	18	4.3233e+07	3.29558e+07	6.34803e+07	6.89127e+07	2.11195e+07	2.62316e+07	2.90197e+07	2.69577e+07	4.15925e+07	3.48953e+07	4.39226e+07	3.81113e+07	3.74234e+07	2.86321e+07	3.46387e+07	3.42406e+07	4.48534e+07	4.1548e+07	4.37829e+07	4.43285e+07	3.51365e+07	4.04201e+07	3.48161e+07	4.99836e+07	4.4985e+07	4.58369e+07	4.21138e+07	2.92479e+07	5.17904e+07	4.07442e+07	3.03896e+07	4.27028e+07	4.74064e+07	2.92687e+07	5.41807e+07
High	MADEAGSEADHEGTHSTKR	[K].MADEAGSEADHEGTHSTKR.[G]		0.00616226	0.000386037	1	1	16	P02671	P02671 [603-621]		1	2028.87	19	77696.6		27975.1	101070		49536.3	55466.7	50999.6	94374.9	57985.9	35766	47628.3	36185.2	37100.5	34040.3	34819.5	37390.7	41368	39413.2	76512.7	56435.8	85462	66361.8	64932.7	53042.5	35933.6	46302.5	97551.4		80484.8	32194	69664.9	104388	59768	66155.4
High	MATTMIQSK	[R].MATTMIQSK.[V]	1xOxidation [M]	0.00313201	0.000386037	1	1	372	P19823	P19823 [85-93]		0	1026.5	9	5.53981e+06	3.23228e+06	3.38209e+06	5.05376e+06	2.60145e+06	4.6452e+06	4.48746e+06	6.09932e+06	5.09564e+06	2.61837e+06	4.38468e+06	5.54994e+06	4.48028e+06	4.06355e+06	4.84778e+06	2.82951e+06	4.65574e+06	4.56107e+06	4.1188e+06	4.93628e+06	3.55669e+06	2.65743e+06	7.24482e+06	4.1173e+06	3.15532e+06	2.5523e+06	4.99764e+06	5.23035e+06	3.28823e+06	3.81293e+06	3.46285e+06	4.26358e+06	4.96962e+06	3.23498e+06	4.59308e+06
High	MCPQLQQYEMHGPEGLR	[K].MCPQLQQYEMHGPEGLR.[V]	1xCarbamidomethyl [C2]; 1xOxidation [M10]	6.21019e-06	0.000386037	1	1	54	P01023	P01023 [688-704]		0	2089.93	17	1.17296e+06	873704		830522	812169	543440	1.05005e+06	494855	1.13992e+06	485585	865831	570168	594738	269915	186540	422429	714007	969305		729079	582963	524965	879797	770056	554812	383545	307631	551995	1.17309e+06	578093	855583	748439	614745	764266	758911
High	MCPQLQQYEMHGPEGLR	[K].MCPQLQQYEMHGPEGLR.[V]	1xCarbamidomethyl [C2]; 2xOxidation [M1; M10]	2.08731e-10	0.000386037	1	1	124	P01023	P01023 [688-704]		0	2105.92	17	3.2422e+06	3.09296e+06	2.6822e+06	2.44265e+06	1.73166e+06	1.28384e+06	2.39779e+06	1.25969e+06	2.59573e+06	1.11657e+06	2.86313e+06	1.63394e+06	1.12067e+06	1.25522e+06	1.37729e+06	1.74117e+06	2.14992e+06	2.28214e+06	1.69145e+06	1.69639e+06	1.06401e+06	1.02544e+06	2.3339e+06	2.00089e+06	1.60036e+06	1.33232e+06	1.26459e+06	1.21159e+06	2.91918e+06	1.56832e+06	3.04471e+06	1.55968e+06	1.07029e+06	1.50424e+06	1.79455e+06
High	MGPTELLIEMEDWK	[R].MGPTELLIEMEDWK.[G]	1xOxidation [M]	3.47719e-13	0.000386037	1	1	1171	P02675	P02675 [335-348]		0	1707.8	14	4.44627e+07	3.36224e+07	3.32188e+07	5.9876e+07	3.44259e+07	4.12598e+07	4.14718e+07	4.05732e+07	4.79227e+07	4.99507e+07	4.77273e+07	3.6198e+07	4.10716e+07	4.41741e+07	4.22335e+07	4.01251e+07	3.86215e+07	4.07684e+07	3.68134e+07	4.41314e+07	4.63381e+07	5.73027e+07	3.57902e+07	5.17254e+07	4.28062e+07	3.93104e+07	4.61039e+07	4.36124e+07	3.03405e+07	3.57741e+07	3.03929e+07	4.0622e+07	4.44002e+07	2.64032e+07	5.37073e+07
High	MDWLVPATCEPIQSVFFFSGDK	[R].MDWLVPATCEPIQSVFFFSGDK.[Y]	1xCarbamidomethyl [C9]	0.00107361	0.000386037	1	1	5	P04004	P04004 [422-443]		0	2574.2	22				73005.9			90817.1			118326			48358.3					82781.5		165178				103305
High	MEEVEAMLLPETLK	[K].MEEVEAMLLPETLK.[R]		2.30147e-10	0.000386037	1	1	160	P01011	P01011 [284-297]		0	1632.82	14	2.76165e+06	1.54927e+06	847985	1.87979e+06	1.86473e+06	2.87972e+06	1.59242e+06	2.28276e+06	2.19128e+06	1.9675e+06	2.16532e+06	1.75529e+06	2.66678e+06	2.74973e+06	2.27734e+06	1.46934e+06	1.6589e+06	1.41968e+06	682440	2.353e+06	1.66562e+06	2.38477e+06	2.01291e+06	2.20107e+06	1.37521e+06	688282	1.46341e+06	1.50279e+06	586207	1.921e+06	1.01056e+06	1.50337e+06	1.90315e+06	2.34373e+06	2.5121e+06
High	MEEVEAMLLPETLK	[K].MEEVEAMLLPETLK.[R]	1xOxidation [M]	2.52527e-12	0.000386037	1	1	785	P01011	P01011 [284-297]		0	1648.82	14	8.98167e+06	7.49486e+06	6.9597e+06	8.77388e+06	8.57035e+06	9.71318e+06	7.70955e+06	8.64422e+06	7.10877e+06	1.01722e+07	8.5862e+06	7.84637e+06	1.00194e+07	1.12548e+07	1.01575e+07	1.0016e+07	6.59855e+06	7.18537e+06	5.38785e+06	9.54163e+06	7.46178e+06	1.01166e+07	7.69103e+06	1.12551e+07	9.48631e+06	6.71296e+06	8.17999e+06	6.67512e+06	5.42996e+06	8.78645e+06	6.41753e+06	5.86803e+06	6.97278e+06	8.90638e+06	9.54917e+06
High	MEEVEAMLLPETLK	[K].MEEVEAMLLPETLK.[R]	2xOxidation [M1; M7]	3.09262e-13	0.000386037	1	1	722	P01011	P01011 [284-297]		0	1664.81	14	2.01975e+07	1.49338e+07	1.86199e+07	2.0312e+07	1.67663e+07	1.42578e+07	1.137e+07	1.08033e+07	1.23504e+07	1.5341e+07	1.60409e+07	1.31719e+07	1.58208e+07	1.78217e+07	1.69975e+07	2.62746e+07	1.7508e+07	1.1939e+07	1.63973e+07	1.30028e+07	1.07703e+07	1.4059e+07	1.30458e+07	2.13737e+07	2.2249e+07	1.5965e+07	1.44954e+07	1.0721e+07	1.81986e+07	1.64021e+07	1.46481e+07	9.33931e+06	1.05505e+07	1.26059e+07	1.60447e+07
High	MEEVEAMLLPETLKR	[K].MEEVEAMLLPETLKR.[W]		0.00162011	0.000386037	1	1	10	P01011	P01011 [284-298]		1	1788.92	15	253460							252331		163028	132914	139051		222575			177321			267997			220168							318424			275911
High	MEEVEAMLLPETLKR	[K].MEEVEAMLLPETLKR.[W]	1xOxidation [M]	0.00250638	0.000386037	1	1	81	P01011	P01011 [284-298]		1	1804.92	15	703210	378437		432509	360724	700601	401827	716339	590937	484829	1.31073e+06	1.02065e+06	641837	527144	490163	529250	460639	821211	596966	706588	684341	940143	497089	396191	772474	855181	911252	1.02049e+06	1.19775e+06	665812	509048	499715	1.12119e+06	800602	603901
High	MEEVEAMLLPETLKR	[K].MEEVEAMLLPETLKR.[W]	2xOxidation [M1; M7]	0.000955593	0.000386037	1	1	8	P01011	P01011 [284-298]		1	1820.91	15	883793		489608	678706	602992	295073	466788	455273	910917	1.3164e+06	1.58022e+06	834546	1.2344e+06	1.02547e+06	718028	732262	736742	922422	1.88692e+06	1.12981e+06	1.47758e+06	2.0498e+06	767314	1.00042e+06	1.03335e+06	2.22907e+06	1.13395e+06	1.19858e+06	2.46594e+06	928177	1.44966e+06	1.32003e+06	917085	1.42976e+06	1.1424e+06
High	MEGDSVLLEVDGEEVLR	[K].MEGDSVLLEVDGEEVLR.[L]		0.0121781	0.000386037	1	1	8	P04278	P04278 [136-152]		0	1889.92	17	552609	216287	742253	243161			952003				671005	280061	445409			358619		618479	444562					874524	301624	442695	643643	730573		957256	226507	559354		372726
High	MEGDSVLLEVDGEEVLR	[K].MEGDSVLLEVDGEEVLR.[L]	1xOxidation [M1]	2.22957e-11	0.000386037	1	1	10	P04278	P04278 [136-152]		0	1905.91	17	292427		827890															140479		659143			382863	453955	510395				650575	822587	483964	293420
High	MDWLVPATCEPIQSVFFFSGDK	[R].MDWLVPATCEPIQSVFFFSGDK.[Y]	1xCarbamidomethyl [C9]; 1xOxidation [M1]	3.35111e-06	0.000386037	1	1	10	P04004	P04004 [422-443]		0	2590.2	22	150411	130945		822823			218670		114678	186548			88326.1				196271	220294		863977			72982.8	959206		231646		128385	218162		165686	216959
High	MGPTELLIEMEDWK	[R].MGPTELLIEMEDWK.[G]	2xOxidation [M1; M10]	4.23761e-12	0.000386037	1	1	1193	P02675	P02675 [335-348]		0	1723.79	14	5.89825e+07	4.68843e+07	6.26068e+07	7.18771e+07	3.83227e+07	4.99422e+07	5.85336e+07	3.88336e+07	5.65117e+07	5.74176e+07	5.98137e+07	5.4273e+07	3.84723e+07	4.60892e+07	5.49163e+07	6.32063e+07	6.86542e+07	4.85879e+07	7.59362e+07	4.34286e+07	4.6627e+07	5.20785e+07	3.86875e+07	5.93996e+07	5.08703e+07	6.59383e+07	5.9921e+07	3.55844e+07	7.0533e+07	4.21775e+07	5.71987e+07	4.84153e+07	5.83134e+07	2.78054e+07	5.2672e+07
High	MGPTELLIEMEDWKGDK	[R].MGPTELLIEMEDWKGDK.[V]		6.75567e-13	0.000386037	1	1	330	P02675	P02675 [335-351]		1	1991.95	17	1.23366e+07	6.3588e+06	2.70474e+06	1.08646e+07	4.70676e+06	8.22971e+06	1.01802e+07	1.13867e+07	1.22154e+07	1.26156e+07	9.98296e+06	8.56247e+06	1.29759e+07	1.11587e+07	7.86664e+06	6.44205e+06	1.02931e+07	1.02061e+07	7.40222e+06	1.41448e+07	1.80988e+07	1.56795e+07	1.1228e+07	1.14709e+07	9.63409e+06	7.79216e+06	1.15462e+07	1.89074e+07	6.21727e+06	1.04992e+07	8.22565e+06	1.74466e+07	1.65561e+07	1.16461e+07	1.26981e+07
High	MGPTELLIEMEDWKGDK	[R].MGPTELLIEMEDWKGDK.[V]	1xOxidation [M]	3.80603e-16	0.000386037	1	1	744	P02675	P02675 [335-351]		1	2007.94	17	2.51567e+07	1.93213e+07	1.24959e+07	3.11865e+07	1.29162e+07	1.78728e+07	1.90777e+07	1.9619e+07	1.88095e+07	2.01104e+07	2.07981e+07	1.69095e+07	1.79213e+07	1.55902e+07	1.55865e+07	1.74764e+07	2.23808e+07	2.12356e+07	1.95187e+07	2.36114e+07	3.16787e+07	2.90588e+07	1.68122e+07	1.93188e+07	1.82192e+07	2.73391e+07	2.25607e+07	2.63868e+07	1.91962e+07	1.93096e+07	1.74021e+07	2.14881e+07	2.72735e+07	1.3628e+07	2.83841e+07
High	MSDLGAVISLLLWGR	[-].MSDLGAVISLLLWGR.[Q]	1xMet-loss+Acetyl [N-Term]	5.34898e-05	0.000386037	1	1	5	P00739	P00739 [1-15]	P00739 1xMet-loss+Acetyl [N-Term]	0	1541.87	15		80325.7					55839.5				107999				33111.1	31744		20058.9		67190.5						52565.1	36021.6							38510.4
High	MSDLGAVISLLLWGR	[-].MSDLGAVISLLLWGR.[Q]	1xOxidation [M1]	1.07177e-15	0.000386037	1	1	62	P00739	P00739 [1-15]		0	1646.89	15		309856	156711	180275	30249.2	246395		117614		160898			108736	54344.4		131378			127975		188423	90122.3			44959.1	164148	60119.3	20111.6	24525.3	37967	37930.3			152659
High	MSGDLSSNVTVSVTSSTISSNVASK	[R].MSGDLSSNVTVSVTSSTISSNVASK.[A]	1xOxidation [M1]	6.01888e-05	0.000386037	1	1	4	P35908	P35908 [491-515]		0	2474.19	25
High	MSSINADFAFNLYR	[K].MSSINADFAFNLYR.[R]		0.000427742	0.000386037	1	1	4	P05543	P05543 [42-55]		0	1648.78	14			145751	302283	287577	309232		151771	166165	379836	220694	113751	257717	250863	190028	253822		329406	159278	265855	274449	319551	202549	276670	327635	162519	170235	173458		301055		179451	160725	365241	525736
High	MSSINADFAFNLYR	[K].MSSINADFAFNLYR.[R]	1xOxidation [M1]	1.29342e-10	0.000386037	1	1	169	P05543	P05543 [42-55]		0	1664.77	14	793888	1.68266e+06	1.98542e+06	1.57657e+06	1.67046e+06	1.96439e+06	1.9715e+06	941778	1.3441e+06	2.14217e+06	1.96915e+06	904383	1.42892e+06	1.57677e+06	1.67252e+06	1.6774e+06	1.53547e+06	2.13197e+06	1.93213e+06	1.92575e+06	1.68275e+06	1.41937e+06	1.73112e+06	1.58096e+06	2.70574e+06	1.90208e+06	1.53067e+06	1.54846e+06	1.41334e+06	2.18341e+06	1.38035e+06	1.19956e+06	909280	1.70073e+06	2.08154e+06
High	MTQSPSSFSASTGDR	[R].MTQSPSSFSASTGDR.[V]	1xOxidation [M1]	3.67798e-10	0.000386037	1	1	98	A0A0C4DH67	A0A0C4DH67 [24-38]		0	1574.68	15				1.19369e+06	460257		512136	1.80603e+06		523477		237092			1.35116e+06		224193	465198	520328	581722			1.05997e+06	424707	189455	1.11757e+06	659537	457845	934212	327863	334405	869422	622122	1.99849e+06	367577
High	MTSNFPVDLSDYPK	[K].MTSNFPVDLSDYPK.[S]		2.03198e-09	0.000386037	1	1	177	P04114	P04114 [1189-1202]		0	1613.75	14			350914	1.84694e+06		2.69436e+06		3.46751e+06	2.31222e+06		612244		2.67836e+06	2.22721e+06		582556			357838		1.93864e+06	2.52611e+06			378522		2.06154e+06	2.25438e+06		561018	1.13063e+06	2.39511e+06		3.43152e+06	2.4107e+06
High	MTSNFPVDLSDYPK	[K].MTSNFPVDLSDYPK.[S]	1xOxidation [M1]	2.99594e-10	0.000386037	1	1	135	P04114	P04114 [1189-1202]		0	1629.75	14	8.41168e+06	1.24953e+07	1.14934e+07	1.02863e+07	1.01899e+07	1.2339e+07	8.58795e+06	1.41209e+07	1.14093e+07	8.46122e+06	6.90867e+06	8.68247e+06	1.30264e+07	1.05745e+07	1.46986e+07	1.19952e+07	1.02606e+07	8.68753e+06	1.18389e+07	9.55831e+06	7.8886e+06	1.28363e+07	8.52431e+06	9.12585e+06	7.96447e+06	9.80356e+06	1.04631e+07	1.12092e+07	1.42291e+07	6.96643e+06	8.41925e+06	1.00742e+07	6.3542e+06	1.44316e+07	1.10254e+07
High	MSDKPDMAEIEK	[-].MSDKPDMAEIEK.[F]	1xOxidation [M7]; 1xMet-loss+Acetyl [N-Term]	4.62395e-05	0.000386037	1	1	96	P62328	P62328 [1-12]	P62328 1xMet-loss+Acetyl [N-Term]	0	1320.6	12	1.87887e+06	2.03609e+06	2.48646e+06	2.14579e+06	2.14184e+06	1.14549e+06	1.27077e+06	1.93182e+06	1.48469e+06	1.46953e+06	1.44461e+06	4.07488e+06	1.38838e+06	2.42477e+06	2.04746e+06	1.89608e+06	2.8946e+06	3.37487e+06	2.58458e+06		1.31886e+06	1.98862e+06	2.69661e+06	1.78761e+06	1.39785e+06	1.43093e+06	2.74829e+06	3.87026e+06		2.63337e+06	3.16316e+06	2.27301e+06	1.82825e+06	1.17413e+06	1.72764e+06
High	MTVSTLVLGEGATEAEISMTSTR	[R].MTVSTLVLGEGATEAEISMTSTR.[W]		2.14938e-10	0.000386037	1	1	53	P02760	P02760 [63-85]		0	2384.17	23	253484	541198	204542	337442	311994	997020	621681	698918	378372	648499	243183	277820	453366	548074	807037	271883	126767	338049	362610	366244	584010	940492	501552	394302	338358		483830	561926			219160	682788	354147	744361	443561
High	MTVSTLVLGEGATEAEISMTSTR	[R].MTVSTLVLGEGATEAEISMTSTR.[W]	2xOxidation [M1; M19]	5.55705e-17	0.000386037	1	1	408	P02760	P02760 [63-85]		0	2416.16	23	2.69737e+06	5.72956e+06	3.99278e+06	3.54783e+06	3.59452e+06	5.02966e+06	3.14748e+06	4.57309e+06	3.17193e+06	6.53043e+06	2.31006e+06	3.31643e+06	3.78584e+06	3.2727e+06	5.30119e+06	4.7221e+06	3.53364e+06	3.45256e+06	7.04099e+06	3.17622e+06	4.3669e+06	7.78376e+06	3.35066e+06	3.97111e+06	5.2172e+06	4.34279e+06	6.48711e+06	4.50771e+06	3.12107e+06	1.96083e+06	3.99759e+06	4.48193e+06	3.18687e+06	2.9575e+06	3.76147e+06
High	MTVTDQVNCPK	[K].MTVTDQVNCPK.[L]	1xCarbamidomethyl [C9]	5.23761e-06	0.000386037	1	1	116	P05090	P05090 [177-187]		0	1292.6	11	465677	737767	311498	542741	763384	803438	890304	1.26874e+06	610036	799228	204909	676800	430590	823571	663080	292457	507705	679611	211693	1.59446e+06	301772	188601	705722	681762	349658	382752	344003	511293	868616	614540	1.12593e+06	560681	712318	450091	757667
High	MTVTDQVNCPK	[K].MTVTDQVNCPK.[L]	1xCarbamidomethyl [C9]; 1xOxidation [M1]	1.31077e-06	0.000386037	1	1	168	P05090	P05090 [177-187]		0	1308.59	11	1.43154e+06	1.653e+06	745371	1.40566e+06	1.90446e+06	1.76298e+06	2.14639e+06	2.129e+06	1.43964e+06	1.70029e+06	630173	1.45188e+06	977980	1.17614e+06	1.61727e+06	1.02835e+06	1.7328e+06	1.17958e+06	1.06747e+06	2.14536e+06	926368	405645	1.61804e+06	1.29854e+06	908141	1.7801e+06	1.08657e+06	873463	2.75568e+06	1.33285e+06	3.53875e+06	1.22778e+06	995032	913081	1.45437e+06
High	MVETTAYALLTSLNLK	[R].MVETTAYALLTSLNLK.[D]		2.062e-11	0.000386037	1	1	297	P01031	P01031 [1247-1262]		0	1767.96	16	1.59076e+06	1.14181e+06	839814	1.70208e+06	1.81396e+06	1.98931e+06	1.50829e+06	1.93848e+06	1.60676e+06	1.94191e+06	1.58648e+06	1.29601e+06	2.22158e+06	2.40961e+06	2.66425e+06	1.8341e+06	1.49006e+06	2.52754e+06	1.60508e+06	1.28586e+06	1.76269e+06	2.64746e+06	1.62545e+06	1.93365e+06	2.66294e+06	1.89588e+06	2.70938e+06	1.9822e+06	577202	2.29053e+06	1.64246e+06	1.22016e+06	1.76693e+06	2.01614e+06	2.99227e+06
High	MVETTAYALLTSLNLK	[R].MVETTAYALLTSLNLK.[D]	1xOxidation [M1]	6.11214e-14	0.000386037	1	1	341	P01031	P01031 [1247-1262]		0	1783.95	16	4.67738e+06	4.78267e+06	5.23405e+06	4.87259e+06	4.31652e+06	4.51792e+06	3.76084e+06	3.57652e+06	3.90291e+06	4.69441e+06	5.17727e+06	3.44415e+06	4.31649e+06	6.70146e+06	6.06536e+06	6.22551e+06	4.11103e+06	5.83622e+06	6.00137e+06	3.61999e+06	5.19851e+06	5.91722e+06	4.98829e+06	5.13444e+06	7.15383e+06	6.81267e+06	7.33262e+06	6.02063e+06	3.0889e+06	5.0488e+06	4.55056e+06	4.389e+06	4.56964e+06	3.85216e+06	7.03475e+06
High	MVSGFIPLKPTVK	[K].MVSGFIPLKPTVK.[M]		0.000243626	0.000386037	2	2	108	P01023; P20742	P01023 [1385-1397]; P20742 [1391-1403]		0	1416.83	13	1.40316e+06	1.13701e+06	507548	1.23611e+06	2.21405e+06	935235	1.38094e+06	1.65369e+06	2.35989e+06	877130	1.78471e+06	974826	791934	532634	444117	1.00809e+06	1.0825e+06	2.11067e+06	1.13924e+06	1.67767e+06	1.15029e+06	927986	1.25179e+06	1.10348e+06	1.75082e+06	674739	763773	1.01858e+06	1.48355e+06	1.39959e+06	1.84612e+06	2.82884e+06	1.74898e+06	2.03516e+06	1.08672e+06
High	MVSGFIPLKPTVK	[K].MVSGFIPLKPTVK.[M]	1xOxidation [M1]	3.78186e-05	0.000386037	2	2	414	P01023; P20742	P01023 [1385-1397]; P20742 [1391-1403]		0	1432.82	13	3.08584e+06	3.70696e+06	2.69641e+06	2.65477e+06	1.78954e+06	2.86771e+06	3.09232e+06	2.30525e+06	3.52025e+06	2.439e+06	4.14853e+06	1.65042e+06	2.81395e+06	1.95895e+06	1.06832e+06	2.71029e+06	2.70182e+06	3.77065e+06	1.94603e+06	2.61043e+06	1.85205e+06	1.84847e+06	3.85223e+06	2.31339e+06	3.71874e+06	2.44802e+06	1.69283e+06	3.18531e+06	6.4456e+06	4.27068e+06	3.19059e+06	6.86531e+06	4.84941e+06	2.5049e+06	1.96579e+06
High	MVVSMTLGLHPWIANIDDTQYLAAK	[K].MVVSMTLGLHPWIANIDDTQYLAAK.[R]	2xOxidation [M1; M5]	0.000516315	0.000386037	1	1	10	Q96KN2	Q96KN2 [407-431]		0	2819.41	25		406429																	363340		349491				371504
High	MTVSTLVLGEGATEAEISMTSTR	[R].MTVSTLVLGEGATEAEISMTSTR.[W]	1xOxidation [M]	1.70443e-13	0.000386037	1	1	410	P02760	P02760 [63-85]		0	2400.16	23	1.33825e+06	3.38325e+06	1.78298e+06	2.16135e+06	1.94392e+06	4.00947e+06	1.78656e+06	4.21077e+06	1.87051e+06	4.39172e+06	1.32665e+06	1.81288e+06	2.21723e+06	2.5414e+06	3.74977e+06	1.65081e+06	1.49723e+06	1.99455e+06	2.45858e+06	2.23466e+06	2.98549e+06	5.7572e+06	2.23233e+06	2.41089e+06	2.26979e+06	1.02863e+06	3.50122e+06	2.617e+06	1.21045e+06	1.21534e+06	1.75223e+06	2.63214e+06	1.91467e+06	2.4061e+06	2.50751e+06
High	IYSGILNLSDITK	[R].IYSGILNLSDITK.[D]		3.60684e-10	0.000386037	1	1	162	P03952	P03952 [447-459]		0	1436.8	13	1.57557e+06	1.61175e+06	1.30019e+06		1.33831e+06	1.73856e+06	1.75766e+06	2.23177e+06	1.57126e+06	1.52301e+06	1.11254e+06	1.44346e+06	2.68094e+06	1.39447e+06	2.30911e+06	2.38913e+06	1.76904e+06	1.66651e+06	1.49188e+06	2.00586e+06	1.60563e+06	1.83585e+06	1.90336e+06	2.10253e+06	2.61783e+06	2.33609e+06	1.60262e+06	2.1901e+06	1.82054e+06	2.67921e+06	1.71408e+06	1.74143e+06	1.50863e+06	1.80219e+06	2.01258e+06
High	MRPSTDTITVMVENSHGLR	[K].MRPSTDTITVMVENSHGLR.[V]	2xOxidation [M1; M11]	5.93549e-10	0.000386037	2	2	186	P0C0L4; P0C0L5	P0C0L4 [167-185]; P0C0L5 [167-185]		0	2176.05	19	1.22823e+06	2.87644e+06	2.96611e+06	2.23721e+06	1.5382e+06	2.51436e+06	1.5511e+06	2.42578e+06	3.48468e+06	4.20593e+06	2.87652e+06	2.35523e+06	1.96304e+06	1.88489e+06	1.64241e+06	1.99477e+06	3.55919e+06	3.87076e+06	4.56571e+06	2.32643e+06	3.47445e+06	1.66547e+06		475336	3.09306e+06	3.2471e+06	1.97451e+06	2.93135e+06	1.36503e+06	1.86938e+06	1.64916e+06	4.25175e+06	4.03908e+06	2.85729e+06	411743
High	MQQVENGLSEK	[K].MQQVENGLSEK.[T]	1xOxidation [M1]	0.000295086	0.000386037	1	1	42	P05154	P05154 [275-285]		0	1278.6	11	1.00615e+06	1.05052e+06	905411	904108	1.04554e+06	1.04456e+06	1.00313e+06	870284	888315	692495	742689	873208		445530	947072		781160	600748	978173	810287			1.17172e+06	601684		884893		611159	721853		759547		634235		706792
High	MGPTELLIEMEDWKGDK	[R].MGPTELLIEMEDWKGDK.[V]	2xOxidation [M1; M10]	6.73924e-14	0.000386037	1	1	977	P02675	P02675 [335-351]		1	2023.94	17	3.08341e+07	3.94255e+07	3.01644e+07	3.37532e+07	2.78791e+07	2.63357e+07	3.18133e+07	1.96414e+07	3.05007e+07	3.13716e+07	3.75434e+07	2.25921e+07	2.60529e+07	2.3938e+07	2.4365e+07	3.34583e+07	4.60592e+07	2.87975e+07	5.39134e+07	5.01603e+07	3.21643e+07	4.08255e+07	2.11839e+07	3.35606e+07	3.05377e+07	4.6742e+07	3.97026e+07	3.35916e+07	4.87027e+07	3.03691e+07	3.60372e+07	2.91582e+07	6.22962e+07	2.21102e+07	3.12803e+07
High	MKPVPDLVPGNFK	[K].MKPVPDLVPGNFK.[S]		2.03885e-06	0.000386037	1	1	318	P02671	P02671 [226-238]		0	1441.79	13	7.54263e+06	5.48199e+06	3.59517e+06	9.10693e+06	6.5178e+06	5.74012e+06	8.21423e+06	9.73137e+06	1.15925e+07	7.92875e+06	1.11029e+07	8.22532e+06	7.33325e+06	6.17219e+06	4.21426e+06	6.61275e+06	8.64218e+06	8.85072e+06	7.6347e+06	1.08768e+07	1.23047e+07	1.25083e+07	5.58905e+06	9.40783e+06	7.5532e+06	1.05084e+07	7.37604e+06	1.20727e+07	6.79049e+06	9.22501e+06	7.57856e+06	2.51184e+07	2.4132e+07	5.94792e+06	9.14434e+06
High	MKPVPDLVPGNFK	[K].MKPVPDLVPGNFK.[S]	1xOxidation [M1]	2.52654e-07	0.000386037	1	1	362	P02671	P02671 [226-238]		0	1457.78	13	2.86664e+07	2.75197e+07	3.48861e+07	2.65312e+07	1.92096e+07	2.70184e+07	3.54444e+07	2.70118e+07	3.85058e+07	2.80175e+07	5.39106e+07	3.32852e+07	3.32642e+07	2.8762e+07	2.27489e+07	4.33384e+07	4.91368e+07	4.10159e+07	4.19168e+07	3.37543e+07	4.97141e+07	3.49247e+07	2.51696e+07	3.55629e+07	2.94948e+07	7.31588e+07	2.50899e+07	4.74925e+07	5.01858e+07	4.1159e+07	3.88793e+07	8.73708e+07	8.9234e+07	1.52391e+07	2.9715e+07
High	MLEEIMKYEASILTHDSSIRYLQEIYNSNNQK	[K].MLEEIMKYEASILTHDSSIRYLQEIYNSNNQK.[I]	2xOxidation [M1; M6]	0.00222219	0.000386037	1	1	12	P02679	P02679 [115-146]		2	3892.87	32	312887		458232	200759		195997	343609		171277	372014	344845	131897			575045	797773	597716			308239	434994	595441	230666	429307	441386	693198	497995	631203	810087	623922	329339		362733		440962
High	MLQITNTGFEMK	[K].MLQITNTGFEMK.[L]		0.00137541	0.000386037	1	1	2	P20742	P20742 [304-315]		0	1412.69	12
High	MLQITNTGFEMK	[K].MLQITNTGFEMK.[L]	1xOxidation [M]	0.000221274	0.000386037	1	1	18	P20742	P20742 [304-315]		0	1428.69	12			1.41916e+06	118081			127567					484803					175618	277598		3.12393e+06		1.10595e+06		247432	1.35349e+06	150159	70415.6		2.73301e+06	1.1287e+06				112134	383121
High	MLQITNTGFEMK	[K].MLQITNTGFEMK.[L]	2xOxidation [M1; M11]	2.66525e-06	0.000386037	1	1	42	P20742	P20742 [304-315]		0	1444.68	12	470130		8.31458e+06	345223							231313	425889				336237	1.0452e+06	312747		3.24237e+06		778984		315334	2.01431e+06	1.35967e+06			7.78913e+06	1.06677e+06					648027
High	MLTPEHVFIHPGWK	[K].MLTPEHVFIHPGWK.[L]		1.33624e-06	0.000386037	1	1	85	P09871	P09871 [502-515]		0	1691.87	14	1.72057e+06	1.28682e+06	365418	1.64711e+06	2.33534e+06	1.59637e+06	1.84142e+06	2.14527e+06	1.77304e+06	1.2422e+06	1.76794e+06	2.03403e+06	1.87013e+06	2.2166e+06	1.63705e+06	2.07108e+06	1.65855e+06	2.05947e+06	1.55906e+06	1.96237e+06	2.37255e+06	3.23681e+06	2.04965e+06	2.42245e+06	2.06222e+06	888778	1.98409e+06	2.70517e+06	1.46683e+06	1.96002e+06	1.60942e+06	2.09135e+06	1.988e+06	2.6683e+06	1.70449e+06
High	MRPSTDTITVMVENSHGLR	[K].MRPSTDTITVMVENSHGLR.[V]	1xOxidation [M1]	2.32972e-09	0.000386037	2	2	39	P0C0L4; P0C0L5	P0C0L4 [167-185]; P0C0L5 [167-185]		0	2160.05	19	431588	328560	148179	583956	421234	534785	512891	694790	693518	1.00681e+06	692938	633682	693922	383244	268325	510259	763012	886519	675714	480304	1.24875e+06	511079		455973	860916	686244	452950	1.05039e+06	215528	700117	565051	2.30526e+06	1.57358e+06	816659	233731
High	MLTPEHVFIHPGWK	[K].MLTPEHVFIHPGWK.[L]	1xOxidation [M1]	3.06995e-08	0.000386037	1	1	386	P09871	P09871 [502-515]		0	1707.87	14	4.7804e+06	6.29285e+06	4.97403e+06	6.89706e+06	5.2946e+06	4.90432e+06	6.34992e+06	5.11959e+06	5.59757e+06	5.66208e+06	8.39837e+06	6.72454e+06	7.42632e+06	6.9115e+06	5.45431e+06	1.01431e+07	7.42823e+06	7.28734e+06	5.19155e+06	4.44103e+06	7.81019e+06	9.8964e+06	7.00287e+06	7.59102e+06	8.71705e+06	7.9823e+06	6.42724e+06	7.69884e+06	8.05441e+06	7.3737e+06	7.56903e+06	6.54528e+06	6.30321e+06	5.9018e+06	4.80213e+06
High	MNTVIAALSR	[K].MNTVIAALSR.[D]		0.000179198	0.000386037	1	1	31	P08185	P08185 [273-282]		0	1075.59	10	361720	421455	396606	417607	404369	446576	385476	505668	418477	335114	437405	412381	598035	579682	441429	475715	437538	454626	359551	914738	369586	547010	500867	512943	678991	388278	334429	398927	673763	973829	446405	625398	609896	362113	425493
High	MNTVIAALSR	[K].MNTVIAALSR.[D]	1xOxidation [M1]	1.91154e-05	0.000386037	1	1	179	P08185	P08185 [273-282]		0	1091.59	10	2.43729e+06	3.54772e+06	5.24353e+06	2.28016e+06	2.37535e+06	2.28538e+06	3.07398e+06	2.02499e+06	2.51186e+06	1.92586e+06	2.75011e+06	2.00221e+06	2.81502e+06	2.39878e+06	1.8516e+06	2.79318e+06	2.97009e+06	2.47327e+06	2.75773e+06	2.89972e+06	1.9316e+06	1.67581e+06	2.59638e+06	2.34415e+06	2.52111e+06	3.29838e+06	1.63015e+06	1.84239e+06	4.14853e+06	4.14337e+06	2.65941e+06	3.66126e+06	2.98819e+06	1.06018e+06	1.58288e+06
High	MPCAEDYLSVVLNQLCVLHEK	[R].MPCAEDYLSVVLNQLCVLHEK.[T]	2xCarbamidomethyl [C3; C16]	0.000350898	0.000386037	1	1	20	P02768	P02768 [470-490]		0	2518.21	21			65688.4				270169									54816.2						114922		171298						150948	202805			47271	178125
High	MPCAEDYLSVVLNQLCVLHEK	[R].MPCAEDYLSVVLNQLCVLHEK.[T]	2xCarbamidomethyl [C3; C16]; 1xOxidation [M1]	4.18222e-05	0.000386037	1	1	33	P02768	P02768 [470-490]		0	2534.21	21	462436	975616	737464	645531	852815	430220	790719	633820	596260	668872	845395	786561	1.11829e+06	990751	958819	1.24201e+06	559794	716484	1.35398e+06	808135	756174	542500	746356	1.00903e+06	684187	1.69967e+06	1.42053e+06	720099	775625	724161	924535	515725	851536	891457	881669
High	MPITYDNGFLFIHTDKPVYTPDQSVK	[R].MPITYDNGFLFIHTDKPVYTPDQSVK.[V]		5.92345e-06	0.000386037	1	1	72	P01031	P01031 [117-142]		0	3026.5	26	552964	532123	465751	686558	629069	813940	656215	736470	960246	955933	746892	769486	685875	832923	717957	574943	568068	897398	579296	872858	884218	961285	768145	544335	738392	581115	762544	770246	439797	823953	230514	611398	617066	596830	765642
High	MPITYDNGFLFIHTDKPVYTPDQSVK	[R].MPITYDNGFLFIHTDKPVYTPDQSVK.[V]	1xOxidation [M1]	7.34711e-07	0.000386037	1	1	13	P01031	P01031 [117-142]		0	3042.49	26	5.61295e+06	1.10169e+07	1.00086e+07	2.99657e+06	1.63186e+07	1.16519e+07	1.3395e+07	1.55501e+07	1.13607e+07	6.00847e+06	8.85193e+06		1.27091e+07	9.91742e+06	2.71113e+06	3.87826e+06	3.15733e+06	7.26887e+06		5.2327e+06	4.83493e+06	2.12982e+06	1.21062e+07		3.10246e+06	2.35049e+06	7.03201e+06	8.27072e+06	6.5977e+06		3.8725e+06	2.90363e+06	2.95222e+06		3.91318e+06
High	MQILEGLGLNLQK	[K].MQILEGLGLNLQK.[S]	1xOxidation [M1]	1.9249e-06	0.000386037	1	1	161	P05154	P05154 [89-101]		0	1472.81	13	502995	842472	791570	772963	802527	980616	799303	595293	630868	806309	609452	470806		523325	970408		590312	576255	776391	635837			760211	711452		763687		652509	646108		680915		826636		737219
High	MQQNIQELEEQLEEEESAR	[K].MQQNIQELEEQLEEEESAR.[Q]	1xOxidation [M1]	0.00516488	0.000386037	1	1	1	P35579	P35579 [941-959]		0	2349.05	19
High	MMAVAADTLQR	[R].MMAVAADTLQR.[L]	2xOxidation [M1; M2]	0.00355349	0.000386037	1	1	9	Q96KN2	Q96KN2 [77-87]		0	1238.59	11	1.22197e+06	1.48481e+06	1.45775e+06	702379		847470	1.0474e+06	1.17208e+06	778910	896913		1.05497e+06	754448	607614	863619	928694	390308		1.26999e+06	1.0993e+06	1.12013e+06	556715	754372	563266	1.33287e+06	1.02061e+06	880447	874544	1.02578e+06	1.07746e+06	1.11851e+06	891559	852305	1.03714e+06
High	SLFTDLVAEK	[R].SLFTDLVAEK.[D]		2.34364e-05	0.000386037	1	1	94	P20742	P20742 [71-80]		0	1122.6	10
High	LYPIANGNNQSPVDIK	[K].LYPIANGNNQSPVDIK.[T]		6.51061e-06	0.000386037	1	1	8	P00915	P00915 [20-35]		0	1742.91	16																				1.22382e+06									1.64793e+06
High	LYLVQGTQVYVFLTK	[K].LYLVQGTQVYVFLTK.[G]		7.48517e-11	0.000386037	1	1	524	P02790	P02790 [318-332]		0	1772	15	7.98069e+06	1.89716e+07	1.27075e+07	2.4282e+07	1.94783e+07	2.68993e+07	1.19781e+07	1.94358e+07	1.48838e+07	3.29059e+07	2.53491e+07	6.01458e+06	1.09706e+07	1.63888e+07	1.86463e+07	2.2848e+07	1.15925e+07	2.77365e+07	2.5534e+07	1.28658e+07	2.88162e+07	1.93425e+07	1.13365e+07	1.76159e+07	2.07599e+07	3.35548e+07	2.73435e+07	2.31604e+07	1.05739e+07	2.29276e+07	1.72854e+07	1.16122e+07	1.08216e+07	1.87696e+07	3.41369e+07
High	ITHYNYLILSK	[K].ITHYNYLILSK.[G]		4.33785e-05	0.000386037	1	1	256	P01031	P01031 [496-506]		0	1364.76	11	9.51187e+06	8.27368e+06	8.33205e+06	8.28774e+06	1.02005e+07	8.03228e+06	8.07328e+06	7.17647e+06	8.78988e+06	8.02474e+06	9.9482e+06	1.39367e+07	1.13515e+07	1.07095e+07	9.43248e+06	1.03967e+07	9.58089e+06	1.19763e+07	8.4678e+06	1.0003e+07	1.01832e+07	1.19627e+07	9.43199e+06	9.97996e+06	1.19602e+07	1.17298e+07	1.05381e+07	1.10642e+07	9.62842e+06	1.31602e+07	1.08994e+07	1.14203e+07	1.11352e+07	7.74572e+06	1.03805e+07
High	LTIGEGQQHHLGGAK	[R].LTIGEGQQHHLGGAK.[Q]		7.02482e-13	0.000386037	1	1	2147	P02679	P02679 [418-432]		0	1545.81	15	5.46195e+08	3.17296e+08	6.35919e+08	3.97993e+08	2.88478e+08	3.40928e+08	3.81115e+08	2.99015e+08	4.02089e+08	2.9478e+08	4.31117e+08	3.17945e+08	2.92252e+08	3.20996e+08	3.44328e+08	3.26154e+08	4.16033e+08	3.12949e+08	3.48465e+08	3.55179e+08	2.93893e+08	3.00682e+08	3.47108e+08	2.9586e+08	2.81425e+08	3.09698e+08	3.59606e+08	3.11567e+08	3.39042e+08	3.28226e+08	3.84945e+08	3.46215e+08	4.00977e+08	1.90997e+08	3.50636e+08
High	ITLIINWLQEALSSASLAHMK	[K].ITLIINWLQEALSSASLAHMK.[A]	1xOxidation [M20]	1.09156e-06	0.000386037	1	1	17	P04114	P04114 [2489-2509]		0	2355.27	21		56197		83966.2	74079.1	105501	60121.6	174015	109556	194995	106011		84620.1		117832	98547	52105	64555.4	270196	51381.9	133475	99762.3	34470.9	45447.6	81997	150494	166075	152788	62267.9	65333.5		161606	50961.5	88232.5	56313.9
High	ITLLSALVETR	[K].ITLLSALVETR.[T]		1.2404e-07	0.000386037	1	1	379	P01011	P01011 [380-390]		0	1215.73	11	2.74111e+07	2.27818e+07	2.18516e+07	2.83641e+07	2.88556e+07	2.65171e+07	2.28461e+07	2.29832e+07	2.09966e+07	2.45324e+07	3.27182e+07	1.75815e+07	3.44796e+07	3.03169e+07	2.25955e+07	3.81822e+07	3.04253e+07	2.32763e+07	2.94615e+07	2.92681e+07	2.61913e+07	2.38666e+07	2.11212e+07	2.63251e+07	2.97198e+07	3.68057e+07	2.85576e+07	2.63964e+07	2.03181e+07	3.46875e+07	2.21375e+07	2.97616e+07	3.16771e+07	2.3701e+07	2.97069e+07
High	ITINPDTSK	[R].ITINPDTSK.[N]		0.003498	0.000386037	1	1	127	A0A0B4J1U7	A0A0B4J1U7 [91-99]		0	988.531	9	9.1699e+06	1.16748e+07	7.82636e+06	6.90451e+06	9.53947e+06	7.12477e+06	1.27807e+07	6.11045e+06	7.53934e+06	8.85827e+06	5.60369e+06	1.3846e+07	1.3128e+07	4.80418e+06	3.70941e+06	1.22632e+06	8.03845e+06	1.57678e+06	2.86631e+06	1.05859e+07	7.0838e+06	2.8938e+06	1.07919e+07	4.77615e+06	9.42743e+06	6.51888e+06	6.55899e+06	1.25759e+06	1.20003e+07	1.4511e+07	5.58246e+06	4.56845e+06	5.19971e+06	5.09941e+06	8.62011e+06
High	ITLPDFTGDLR	[R].ITLPDFTGDLR.[I]		0.000239405	0.000386037	1	1	154	P18428	P18428 [57-67]		0	1247.66	11	1.93769e+06	1.80562e+06	2.68592e+06	513055	1.39856e+06	1.67975e+06	1.54694e+06	1.40803e+06	1.45743e+06	1.3557e+06	1.6795e+06	1.59265e+06	1.48385e+06	1.9007e+06	1.48379e+06	1.55219e+06	1.29857e+06	1.49e+06	1.4234e+06	1.45671e+06	2.06518e+06	2.01835e+06	1.18911e+06	1.54995e+06	2.30656e+06	1.05355e+06	1.45917e+06	1.49686e+06	1.45363e+06	1.70275e+06	1.45966e+06	1.22774e+06	1.44113e+06	1.44445e+06	1.54329e+06
High	LTISEQNIQR	[K].LTISEQNIQR.[A]		0.000330291	0.000386037	1	1	356	P04114	P04114 [335-344]		0	1201.65	10	1.30753e+07	1.83581e+07	1.97508e+07	1.92649e+07	1.76391e+07	2.46507e+07	1.42385e+07	2.56282e+07	2.15399e+07	1.75417e+07	1.28301e+07	1.54369e+07	2.56662e+07	1.93807e+07	2.82032e+07	2.04727e+07	1.595e+07	1.39035e+07	2.10201e+07	1.83167e+07	1.77518e+07	2.36526e+07	1.35783e+07	1.44228e+07	1.24492e+07	1.71849e+07	2.04907e+07	1.98578e+07	2.12352e+07	1.25796e+07	1.66561e+07	2.01366e+07	1.11009e+07	2.7193e+07	1.8065e+07
High	LTLTPWVGLR	[K].LTLTPWVGLR.[K]		0.00298657	0.000386037	1	1	84	O75882	O75882 [851-860]		0	1155.69	10	772555	719452	659212	749764	902723	777922	741227	746245	808979	781341	639684	650302	654977	683146	813765	708208	894345	765217	891797	694239	837066	857618	827369	583946	647129	668520	626851	650303	638201	982947	617288	918814	851588	897602	720794
High	ITPGKPYILTVPGHLDEMQLDIQAR	[K].ITPGKPYILTVPGHLDEMQLDIQAR.[Y]		6.40226e-11	0.000386037	2	2	133	P0C0L4; P0C0L5	P0C0L4 [245-269]; P0C0L5 [245-269]		0	2805.5	25	922834	1.3862e+06	520592	1.54914e+06	1.02511e+06	1.32123e+06	1.41476e+06	1.7852e+06	1.33041e+06	2.2206e+06	1.81969e+06	838698	1.55996e+06	1.1529e+06	682457	653741	1.00345e+06	1.96441e+06	1.08126e+06	1.33825e+06	2.81629e+06	1.31547e+06	202414	1.03013e+06	2.00292e+06	1.09627e+06	1.25718e+06	2.16566e+06	506997	1.12676e+06	824711	2.12873e+06	1.92513e+06	1.68693e+06	1.19591e+06
High	ITPGKPYILTVPGHLDEMQLDIQAR	[K].ITPGKPYILTVPGHLDEMQLDIQAR.[Y]	1xOxidation [M18]	4.6609e-09	0.000386037	2	2	139	P0C0L4; P0C0L5	P0C0L4 [245-269]; P0C0L5 [245-269]		0	2821.49	25	2.91624e+06	3.34093e+06	3.38813e+06	2.88878e+06	2.60488e+06	2.3515e+06	2.02827e+06	3.56109e+06	3.11754e+06	4.63371e+06	3.36115e+06	2.33542e+06	2.9122e+06	2.62026e+06	2.09901e+06	2.92305e+06	3.4346e+06	5.04001e+06	4.41164e+06	2.63797e+06	5.53537e+06	3.42889e+06	464628	2.5979e+06	4.93953e+06	3.23148e+06	2.52164e+06	4.64144e+06	2.28582e+06	2.43878e+06	2.51777e+06	4.31376e+06	5.24205e+06	2.37838e+06	2.13927e+06
High	ITPNLAEFAFSLYR	[K].ITPNLAEFAFSLYR.[Q]		1.37818e-08	0.000386037	1	1	965	P01009	P01009 [50-63]		0	1641.86	14	1.81989e+08	3.54359e+08	2.7063e+08	2.76017e+08	2.77787e+08	1.56989e+08	2.12014e+08	2.08565e+08	1.76616e+08	2.67817e+08	2.8843e+08	1.62928e+08	3.0048e+08	3.45042e+08	2.69228e+08	3.07058e+08	2.34175e+08	3.60645e+08	3.00505e+08	3.0624e+08	2.19022e+08	2.21139e+08	2.57796e+08	3.22641e+08	3.2563e+08	3.259e+08	3.58786e+08	2.87709e+08	2.49661e+08	3.41165e+08	2.91165e+08	2.40308e+08	3.00168e+08	2.58902e+08	4.6213e+08
High	ITQVLHFTK	[K].ITQVLHFTK.[D]		0.000737013	0.000386037	2	2	535	P0C0L4; P0C0L5	P0C0L4 [1647-1655]; P0C0L5 [1647-1655]		0	1086.63	9	1.00699e+08	6.50809e+07	7.3021e+07	8.82753e+07	6.15751e+07	5.98053e+07	4.41988e+07	7.09276e+07	6.70615e+07	6.86792e+07	5.63151e+07	6.99346e+07	6.16477e+07	6.75158e+07	6.13978e+07	4.17055e+07	7.89118e+07	9.11226e+07	6.2531e+07	3.99866e+07	7.09226e+07	8.20226e+07	1.36787e+07	5.90547e+07	8.78549e+07	3.23093e+07	5.54328e+07	6.32852e+07	4.71362e+07	5.01531e+07	4.78519e+07	6.72847e+07	6.46874e+07	6.40909e+07	4.79574e+07
High	ITTGGDVINNGLWNMVSVEELEHSISIK	[K].ITTGGDVINNGLWNMVSVEELEHSISIK.[I]		5.1519e-16	0.000386037	1	1	82	P07225	P07225 [371-398]		0	3055.54	28	1.23797e+06	1.21874e+06	1.18464e+06	2.48401e+06	2.14183e+06	2.2598e+06	2.32213e+06	2.23028e+06	1.33584e+06	2.84786e+06	2.27445e+06	1.52232e+06	3.28315e+06	2.40458e+06	3.92376e+06	2.22811e+06	1.29872e+06	2.30603e+06	2.15441e+06	1.92795e+06	2.9882e+06	2.41724e+06	1.1852e+06	3.54965e+06	2.26314e+06	2.59416e+06	1.92822e+06	2.74015e+06	1.09547e+06	1.47193e+06	1.80882e+06	2.319e+06	2.42052e+06	2.75743e+06	4.79683e+06
High	ITTGGDVINNGLWNMVSVEELEHSISIK	[K].ITTGGDVINNGLWNMVSVEELEHSISIK.[I]	1xOxidation [M15]	3.96742e-19	0.000386037	1	1	173	P07225	P07225 [371-398]		0	3071.54	28	2.02058e+06	1.70998e+06	2.15014e+06	3.07234e+06	2.71508e+06	2.71692e+06	3.22584e+06	2.55202e+06	1.56998e+06	3.25055e+06	2.72378e+06	1.70131e+06	3.14557e+06	3.3981e+06	4.52354e+06	4.85127e+06	1.96069e+06	3.11262e+06	4.4986e+06	2.25843e+06	3.41599e+06	3.89703e+06	1.97963e+06	3.3296e+06	3.69688e+06	4.06053e+06	2.31898e+06	3.5445e+06	2.19187e+06	2.11107e+06	2.34085e+06	2.7578e+06	2.8223e+06	2.49685e+06	3.94194e+06
High	ITVVAGEHNIEETEHTEQK	[K].ITVVAGEHNIEETEHTEQK.[R]		1.07174e-11	0.000386037	1	1	159	P00740	P00740 [275-293]		0	2164.05	19	4.35802e+06	2.86717e+06	4.70646e+06	3.98312e+06	3.68608e+06	4.36779e+06	3.86049e+06	2.56528e+06	2.75033e+06	4.01986e+06	3.48765e+06	3.85906e+06	4.1729e+06	4.14885e+06	4.05394e+06	3.18018e+06	3.25002e+06	3.56199e+06	3.4171e+06	2.88543e+06	3.1467e+06	4.45887e+06	3.28836e+06	3.03615e+06	4.12798e+06	3.01727e+06	1.52506e+06	3.32603e+06	2.99298e+06	3.23172e+06	4.18848e+06	2.43324e+06	3.58227e+06	3.46092e+06	2.64692e+06
High	LTYAYFAGGDAGDAFDGFDFGDDPSDK	[R].LTYAYFAGGDAGDAFDGFDFGDDPSDK.[F]		1.36489e-20	0.000386037	1	1	1193	P02679	P02679 [302-328]		0	2834.17	27	1.06188e+08	7.53516e+07	1.0837e+08	1.20633e+08	7.2583e+07	9.34086e+07	1.12385e+08	7.91169e+07	1.00187e+08	1.1922e+08	1.16619e+08	9.59323e+07	1.18539e+08	1.07969e+08	1.18394e+08	1.21398e+08	1.58961e+08	1.47886e+08	1.30075e+08	1.02033e+08	1.32436e+08	1.51112e+08	1.24002e+08	1.37562e+08	1.17024e+08	1.39447e+08	1.27712e+08	1.51436e+08	1.10465e+08	1.04048e+08	8.70056e+07	9.84163e+07	1.15763e+08	5.76159e+07	1.51747e+08
High	ITYGETGGNSPVQEFTVPGSK	[R].ITYGETGGNSPVQEFTVPGSK.[S]		2.95968e-15	0.000386037	1	1	598	P02751	P02751 [1480-1500]		0	2168.05	21	2.20483e+07	1.47224e+07	3.73099e+07	1.78392e+07	1.00639e+07	1.3665e+07	2.20645e+07	1.89111e+07	1.92549e+07	1.61453e+07	1.24559e+07	1.83444e+07	1.13041e+07	1.49504e+07	1.36458e+07	1.20263e+07	2.1903e+07	2.2229e+07	1.29354e+07	2.05613e+07	1.85318e+07	2.27323e+07	9.88652e+06	2.16602e+07	1.69429e+07	1.78033e+07	1.04549e+07	2.50706e+07	2.45632e+07	1.16102e+07	2.83538e+07	1.6974e+07	1.98426e+07	1.13582e+07	1.6681e+07
High	LTHDVELNLDYER	[K].LTHDVELNLDYER.[Y]		0.000353942	0.000386037	1	1	42	P02786	P02786 [601-613]		0	1616.79	13	122461	349298	145427	167571	227125	141365	222301	91363.8	128338	174971	186770	234751	280560	204549	249742	334571	284183	391260	292746	163501	479492	162803	285496		186775	221064		137819	154219	160997	200863	149758	204497	146019	261646
High	ITGTMPPLPLEATGLALSSLR	[K].ITGTMPPLPLEATGLALSSLR.[L]	1xOxidation [M5]	5.49159e-06	0.000386037	1	1	25	P08571	P08571 [128-148]		0	2154.18	21	527494	570961	639195	562379	498458	528545	320430	370892	429355	250159	183471	405098	609525	374571	456188	1.06747e+06	401199	530384	976363	437191	521195	703420	660497	922402	688784	1.10561e+06	276399	448860	547053	576393	636947	454185	222806	380759	341417
High	LTGSSGFVTDGPGNYK	[R].LTGSSGFVTDGPGNYK.[Y]		3.08502e-10	0.000386037	1	1	122	O75882	O75882 [138-153]		0	1599.76	16	5.02574e+06	3.77649e+06	4.25217e+06	3.04722e+06	3.66434e+06	3.25158e+06	3.50259e+06	3.69036e+06	3.63173e+06	4.11915e+06	3.3243e+06	3.57027e+06	3.1255e+06	3.13791e+06	3.16362e+06	3.76148e+06	4.75068e+06	3.91679e+06	3.72493e+06	2.96196e+06	3.18386e+06	3.28106e+06	3.86219e+06	3.43095e+06	3.72097e+06	3.13954e+06	2.55024e+06	3.2178e+06	3.13754e+06	4.38456e+06	3.66183e+06	3.34648e+06	3.67997e+06	4.07218e+06	3.74901e+06
High	ITFELVYEELLK	[K].ITFELVYEELLK.[R]		3.38493e-08	0.000386037	1	1	284	Q14624	Q14624 [140-151]		0	1496.82	12	5.00286e+06	1.52946e+07	1.21516e+07	2.13617e+07	1.0914e+07	1.44842e+07	1.41288e+07	1.15006e+07	6.33988e+06	1.4017e+07	1.55579e+07	6.28563e+06	9.37586e+06	1.4116e+07	1.54757e+07	1.35567e+07	1.03254e+07	1.17597e+07	1.74862e+07	8.57045e+06	1.16868e+07	1.14256e+07	9.00533e+06	1.86754e+07	1.74996e+07	2.30139e+07	2.27138e+07	1.46087e+07	5.66076e+06	1.78057e+07	9.98551e+06	1.18072e+07	7.34797e+06	1.46424e+07	2.41877e+07
High	LSPLGEEMR	[K].LSPLGEEMR.[D]		0.000864453	0.000386037	1	1	321	P02647	P02647 [165-173]		0	1031.52	9	7.76136e+07	7.16781e+07	7.89108e+07	5.45712e+07	1.0682e+08	1.05611e+08	1.3524e+08	1.61147e+08	8.34852e+07	9.27728e+07	8.56877e+07	1.55169e+08	1.33643e+08	1.05325e+08	9.17688e+07	1.07425e+08	6.28782e+07	9.09346e+07	6.6616e+07	1.44085e+08	9.28236e+07	1.16095e+08	1.848e+08	1.46293e+08	1.72267e+08	7.6694e+07	5.1494e+07	8.184e+07	1.03172e+08	2.30112e+08	1.24985e+08	1.51046e+08	1.6878e+08	1.55269e+08	1.33579e+08
High	LSPLGEEMR	[K].LSPLGEEMR.[D]	1xOxidation [M8]	0.00258783	0.000386037	1	1	2407	P02647	P02647 [165-173]		0	1047.51	9	8.24615e+08	7.16649e+08	1.07632e+09	6.2529e+08	7.6618e+08	7.21864e+08	7.31251e+08	6.84712e+08	4.89664e+08	5.38896e+08	5.88566e+08	8.35176e+08	7.12163e+08	6.12701e+08	7.23381e+08	8.32721e+08	6.09846e+08	6.33541e+08	6.48169e+08	6.5883e+08	4.66544e+08	4.82845e+08	7.04285e+08	7.51228e+08	1.0559e+09	5.88496e+08	5.27574e+08	3.99326e+08	8.28349e+08	1.1104e+09	8.50108e+08	5.23555e+08	6.21024e+08	5.01445e+08	4.61708e+08
High	LSPIYNLVPVK	[K].LSPIYNLVPVK.[M]		7.82217e-05	0.000386037	1	1	315	P02748	P02748 [473-483]		0	1242.75	11	1.95628e+07	1.53116e+07	1.18134e+07	2.55126e+07	1.14445e+07	2.00889e+07	1.44564e+07	1.27096e+07	1.8502e+07	1.85804e+07	1.88287e+07	2.16514e+07	1.4455e+07	2.20142e+07	1.23664e+07	1.89785e+07	1.62206e+07	1.58416e+07	1.43537e+07	1.66492e+07	1.52156e+07	2.53011e+07	1.53487e+07	1.82311e+07	2.18749e+07	1.4335e+07	1.49614e+07	5.54917e+06	1.61762e+07	1.75134e+07	1.37372e+07	1.3863e+07	1.71314e+07	1.68771e+07	2.23221e+07
High	LSQLQTYMIQFDQYIK	[K].LSQLQTYMIQFDQYIK.[D]		1.4614e-12	0.000386037	1	1	331	P04114	P04114 [2171-2186]		0	2019.03	16	3.46128e+06	4.69056e+06	3.45441e+06	5.92898e+06	4.12965e+06	7.11616e+06	4.2854e+06	1.05386e+07	5.09289e+06	4.6343e+06	3.8161e+06	3.3033e+06	9.79578e+06	6.36781e+06	1.08673e+07	6.1231e+06	3.25593e+06	4.54765e+06	5.48226e+06	5.99375e+06	5.81534e+06	8.16701e+06	4.49441e+06	4.64782e+06	4.8222e+06	5.16487e+06	6.97702e+06	6.4666e+06	2.91964e+06	4.01703e+06	4.26008e+06	5.95812e+06	3.80736e+06	9.78409e+06	6.05206e+06
High	LSQLQTYMIQFDQYIK	[K].LSQLQTYMIQFDQYIK.[D]	1xOxidation [M8]	1.75939e-12	0.000386037	1	1	611	P04114	P04114 [2171-2186]		0	2035.02	16	4.59443e+06	9.32893e+06	5.84419e+06	8.61407e+06	6.85107e+06	1.10319e+07	6.29704e+06	1.00371e+07	8.80295e+06	9.06575e+06	5.89126e+06	6.478e+06	1.18771e+07	8.84248e+06	1.39268e+07	1.06035e+07	8.96545e+06	6.76232e+06	1.06712e+07	7.51147e+06	8.70775e+06	1.00987e+07	6.92615e+06	6.93271e+06	6.5276e+06	7.93179e+06	1.0133e+07	1.01924e+07	7.6989e+06	6.96175e+06	6.88341e+06	7.19439e+06	4.49568e+06	1.05705e+07	9.26624e+06
High	LSSPAVITDK	[K].LSSPAVITDK.[V]		0.000211784	0.000386037	1	1	662	P00747	P00747 [671-680]		0	1030.58	10	3.30132e+07	3.21028e+07	4.06926e+07	2.81667e+07	3.29182e+07	2.08478e+07	2.83188e+07	3.15586e+07	2.98583e+07	2.38129e+07	2.72451e+07	3.17981e+07	2.89267e+07	2.95581e+07	3.4896e+07	2.97963e+07	1.98169e+07	2.58909e+07	2.7211e+07	3.5105e+07	2.60573e+07	3.57516e+07	2.90557e+07	3.01258e+07	3.28309e+07	2.88715e+07	2.3586e+07	2.99745e+07	4.03418e+07	4.08326e+07	3.23969e+07	2.81883e+07	3.27574e+07	2.55999e+07	3.30826e+07
High	LSSVTAADTAVYYCAR	[K].LSSVTAADTAVYYCAR.[-]	1xCarbamidomethyl [C14]	1.81726e-06	0.000386037	4	5	39	P06331; P01825; A0A075B6R2; P01824	P06331 [108-123]; P01825 [101-116]; A0A075B6R2 [102-117]; P01824 [110-125]		0	1747.83	16	461985		334775	391499	317830	140238	246073	727703	693420	535293				408104		423763	332403		180605		543648		335546		317283					341001		378431	370798	151455	895088
High	LSSWVLLMK	[K].LSSWVLLMK.[Y]		0.000507582	0.000386037	1	1	482	P01009	P01009 [259-267]		0	1076.62	9	4.08605e+07	3.05141e+07	3.25536e+07	5.28862e+07	5.76042e+07	2.99301e+07	4.01286e+07	4.5429e+07	4.2379e+07	5.39104e+07	4.09296e+07	4.0852e+07	4.91304e+07	4.04827e+07	3.30513e+07	3.12547e+07	3.92006e+07	3.60287e+07	2.94296e+07	5.88167e+07	3.68164e+07	4.6646e+07	4.67515e+07	5.78557e+07	4.31272e+07	3.43352e+07	3.68832e+07	3.01646e+07	2.83855e+07	5.03167e+07	4.06396e+07	4.41902e+07	4.3847e+07	4.93725e+07	4.70863e+07
High	LVAYYTLIGASGQR	[R].LVAYYTLIGASGQR.[E]		3.66002e-08	0.000386037	1	1	253	P01024	P01024 [531-544]		0	1511.82	14	4.2192e+06	4.12004e+06	3.50058e+06	4.80221e+06	4.16738e+06	4.8768e+06	3.97178e+06	4.09811e+06	4.8649e+06	4.99286e+06	4.10299e+06	3.85494e+06	3.90405e+06	4.98165e+06	3.92651e+06	4.32862e+06	3.63339e+06	4.98361e+06	5.05584e+06	3.96778e+06	5.45084e+06	3.9518e+06	2.10208e+06	3.42616e+06	3.39266e+06	4.49119e+06	4.82741e+06	4.30937e+06	3.53885e+06	3.51366e+06	2.80891e+06	6.30472e+06	7.95958e+06	2.39709e+06	3.4558e+06
High	LSSWVLLMK	[K].LSSWVLLMK.[Y]	1xOxidation [M8]	0.000431428	0.000386037	1	1	2729	P01009	P01009 [259-267]		0	1092.61	9	2.13695e+07	1.21529e+07	1.28768e+07	8.78345e+06	1.52565e+07	4.39034e+06	6.73299e+06	7.08633e+06	1.37452e+07	7.85822e+06	8.21865e+06	4.89678e+06	7.3514e+06	8.84323e+06	5.95043e+06	5.3087e+06	1.10635e+07	7.48787e+06	5.05055e+06	1.03426e+07	5.99337e+06	5.77502e+06	9.42019e+06	9.33987e+06	9.1203e+06	4.81239e+06	6.839e+06	4.16759e+06	1.44643e+07	1.06355e+07	9.73035e+06	8.72506e+06	8.69005e+06	5.05445e+06	9.71806e+06
High	ITCGGNNIGSK	[R].ITCGGNNIGSK.[SA]	1xCarbamidomethyl [C3]	0.00133091	0.000386037	1	2	3	P80748	P80748 [39-49]		0	1120.54	11	263346	1.47938e+06	113459	314557	264876	162703	184100	314926	583669	268935	112272	481597		119722	79059.3	40201.7	128534	18690.9	170330	173670	135135	28880.8	235475	100030	248525	71929.9	89070.1	73431.5	163495	55252.2	116252	143480	121248	55223.7	251479
High	ITCQGDSLR	[R].ITCQGDSLR.[S]	1xCarbamidomethyl [C3]	0.00675224	0.000386037	1	1	106	P01714	P01714 [39-47]		0	1049.5	9	2.4202e+06	1.67581e+06	1.94675e+06	1.60811e+06	1.93377e+06	1.9513e+06	2.30649e+06	1.82829e+06	3.46344e+06	1.93022e+06	2.06403e+06	2.08474e+06	2.20858e+06	1.20776e+06	1.86404e+06	942444	1.60462e+06	1.31346e+06	1.794e+06	2.24152e+06	2.13451e+06	1.03691e+06	4.36453e+06	1.27518e+06	2.07349e+06	2.05632e+06	2.22497e+06	1.21921e+06	2.45271e+06	2.30772e+06	2.30234e+06	2.28066e+06	1.54677e+06	2.27084e+06	1.72426e+06
High	ITCSGDALPK	[R].ITCSGDALPK.[KQ]	1xCarbamidomethyl [C3]	0.00866097	0.000386037	2	2	122	A0A075B6K4; P01717	A0A075B6K4 [39-48]; P01717 [39-48]		0	1061.53	10	1.54989e+06	963460	1.03967e+06	770791		806473	944395		1.67992e+06		724101	967279	1.03211e+06	655586	558606		483985	668379	637293	723348			774061	652716			822195	144091					1.7489e+06	153919	1.25282e+06
High	ITDVIPSEAINELTVLVLVNTIYFK	[R].ITDVIPSEAINELTVLVLVNTIYFK.[G]		4.15564e-12	0.000386037	1	1	98	P01008	P01008 [230-254]		0	2804.57	25	451746	364245	367772	679362	624152	518909	391929	684838	378363	2.07761e+06	245642				130805	160781	165546	848101	601312	419763	173425	141546		86951.5	143133	750980	277838	102007						133254	470038
High	ITENDIQIALDDAK	[R].ITENDIQIALDDAK.[I]		1.17021e-11	0.000386037	1	1	595	P04114	P04114 [2151-2164]		0	1558.8	14	1.81178e+07	2.86905e+07	2.77861e+07	2.90029e+07	2.97848e+07	3.46775e+07	2.07045e+07	3.75065e+07	3.0306e+07	2.23997e+07	1.8585e+07	2.27193e+07	4.26868e+07	2.83102e+07	4.27688e+07	3.1047e+07	1.9559e+07	2.06226e+07	3.26462e+07	2.72876e+07	2.61291e+07	3.20838e+07	2.52848e+07	2.19259e+07	2.06968e+07	2.39629e+07	3.17921e+07	2.87777e+07	2.9453e+07	1.90146e+07	2.1423e+07	2.93227e+07	1.73415e+07	3.79041e+07	3.04106e+07
High	ITEVALMGHLSCDTK	[K].ITEVALMGHLSCDTK.[E]	1xCarbamidomethyl [C12]	2.9596e-11	0.000386037	1	1	64	P04114	P04114 [1101-1115]		0	1674.82	15	654409	1.39218e+06	660987	1.92637e+06	541525	1.1806e+06	524844	1.42196e+06	1.56462e+06	1.61509e+06	662328	895799	1.18413e+06	1.75661e+06	1.61456e+06	567403	1.40041e+06	1.73086e+06	472096	1.80957e+06	1.36884e+06	1.20268e+06	819380	1.8043e+06	525493	1.08322e+06	453109	1.74689e+06	1.3256e+06	630516	1.29645e+06	1.53422e+06	709291	1.06969e+06	1.82702e+06
High	ITEVALMGHLSCDTK	[K].ITEVALMGHLSCDTK.[E]	1xCarbamidomethyl [C12]; 1xOxidation [M7]	3.95747e-08	0.000386037	1	1	132	P04114	P04114 [1101-1115]		0	1690.81	15	1.6322e+06	3.34995e+06	2.23994e+06	2.75144e+06	980282	1.91417e+06	852733	1.92041e+06	2.45926e+06	2.70906e+06	1.31346e+06	1.225e+06	1.34701e+06	2.31916e+06	2.91063e+06	779948	2.45192e+06	2.2381e+06	1.82338e+06	2.76513e+06	1.74107e+06	1.34638e+06	1.05075e+06	2.13478e+06	839430	2.09403e+06	1.2178e+06	2.33278e+06	2.82758e+06	930859	2.2943e+06	1.58239e+06	982690	1.75163e+06	2.477e+06
High	ITEVWGIPSPIDTVFTR	[R].ITEVWGIPSPIDTVFTR.[C]		1.44991e-07	0.000386037	1	1	99	Q92954	Q92954 [1185-1201]		0	1931.03	17	525647	325656	669021	880399	504245	718303	348381	445092	419857	404856	501546	205942	1.19791e+06	1.04263e+06	952147	927441	483790	526034	1.44571e+06		857004	1.21649e+06	505753	651228	532219	669205	1.31295e+06	1.06907e+06	256725	363295	590470	329557	471886	957529	272087
High	LSYEGEVTK	[K].LSYEGEVTK.[S]		0.00432153	0.000386037	1	1	180	P36955	P36955 [319-327]		0	1025.51	9	1.73902e+07	1.81963e+07	1.66316e+07	1.22755e+07	1.7335e+07	1.72776e+07	1.50016e+07	1.60455e+07	1.60902e+07	1.79348e+07	1.27821e+07	1.71218e+07	1.43964e+07	1.30267e+07	1.8046e+07	1.6904e+07	1.51701e+07	1.51736e+07	1.6922e+07	1.18289e+07	1.27039e+07	1.62896e+07	1.67326e+07	1.29249e+07	2.05901e+07	1.5861e+07	1.526e+07	1.27326e+07	1.87685e+07	1.22613e+07	1.92513e+07	1.34807e+07	1.54181e+07	1.74405e+07	1.32651e+07
High	LVDEDMNSFK	[R].LVDEDMNSFK.[A]		0.000454197	0.000386037	1	1	72	Q06033	Q06033 [507-516]		0	1197.55	10	1.36502e+06	754095	1.05107e+06	1.61714e+06	928486	853276	1.78917e+06	1.36626e+06	1.52287e+06	902283	1.73398e+06	1.89144e+06	464716	1.1857e+06	913785	955469	1.47861e+06	1.43819e+06	649316	1.30135e+06	1.11212e+06	1.36926e+06	2.52288e+06	1.64251e+06	868993	832502	616011	1.01243e+06		1.41881e+06	718498	1.12891e+06	1.05659e+06	1.20585e+06	2.06995e+06
High	LVDFYVMPVVNVDGYDYSWK	[R].LVDFYVMPVVNVDGYDYSWK.[K]		0.00540923	0.000386037	1	1	2	Q96IY4	Q96IY4 [214-233]		0	2409.15	20					284020	116568			266932				161055	280793	322756		99740.8	313673				248183	154380	215272			413253		174686	170162			332984
High	LVDFYVMPVVNVDGYDYSWK	[R].LVDFYVMPVVNVDGYDYSWK.[K]	1xOxidation [M7]	4.3212e-12	0.000386037	1	1	52	Q96IY4	Q96IY4 [214-233]		0	2425.14	20		449209	760396	802906	539017	521179	1.20721e+06	660779	529690	874557	617996	608568	313857		573607	1.03553e+06		1.17412e+06	939570	309463	357802	763230	559234	983591	432335	538625	462315	954606	838968	1.25593e+06	487414	1.15473e+06	522676	1.41065e+06	513861
High	LVSNHSLHETSSVFVDSLTK	[R].LVSNHSLHETSSVFVDSLTK.[A]		8.71391e-05	0.000386037	1	1	23	P21333	P21333 [2521-2540]		0	2200.12	20	100816		75625.8	141748	94673.7		110445	195480	101648		79926.6	236085	125312	150419	72170.2	119804	447818	761734	100630		137826	268404	83457.5	223578		189167	136109	920638		94190.8	197040	406426	504121		134474
High	IVSSAMEPDREYHFGQAVR	[K].IVSSAMEPDREYHFGQAVR.[F]		1.79991e-06	0.000386037	1	1	44	P08603	P08603 [157-175]		1	2192.06	19	879408	808711	565303	515684	875746	741600	1.12547e+06	1.24244e+06	1.27831e+06	1.33621e+06	865898	928769	791517	683351	312606	693894	630985	731752	439817	620675	1.50497e+06	1.11253e+06	701896	980524	820618	1.01919e+06	604508	1.33523e+06	574450		840731	1.63236e+06	1.70044e+06	1.34501e+06	1.09753e+06
High	IVSSAMEPDREYHFGQAVR	[K].IVSSAMEPDREYHFGQAVR.[F]	1xOxidation [M6]	7.59554e-09	0.000386037	1	1	181	P08603	P08603 [157-175]		1	2208.05	19	1.94405e+07	1.56915e+07	1.46614e+07	1.11438e+07	5.64895e+06	4.18887e+06	1.69077e+07	1.41746e+07	2.29736e+07	7.13299e+06	1.76292e+07	1.59404e+07	1.33051e+07	1.19151e+07	1.23924e+07	1.68822e+07	4.98121e+06	1.43427e+07	7.08871e+06	1.48206e+07	2.51087e+07	1.468e+07	8.90616e+06	1.35772e+07	1.60145e+07	2.86592e+07	2.13218e+07	2.208e+07	1.8833e+07	1.81803e+07	1.4042e+07	2.01953e+07	2.35698e+07	1.7417e+07	1.28662e+07
High	LVSVPYVGGNMEVNVYGAIMHEVR	[R].LVSVPYVGGNMEVNVYGAIMHEVR.[F]	1xOxidation [M11]	3.85175e-05	0.000386037	1	1	2	P04275	P04275 [2028-2051]		0	2649.32	24		296808
High	IVTNYFSAHDNDANLQMDIFLEEDGNVNSK	[R].IVTNYFSAHDNDANLQMDIFLEEDGNVNSK.[L]		5.97974e-06	0.000386037	1	1	10	P00488	P00488 [335-364]		0	3413.56	30						191654																				174576		232656				341921
High	IVTNYFSAHDNDANLQMDIFLEEDGNVNSK	[R].IVTNYFSAHDNDANLQMDIFLEEDGNVNSK.[L]	1xOxidation [M17]	1.58012e-08	0.000386037	1	1	52	P00488	P00488 [335-364]		0	3429.55	30	373009	704095	619826	237065	436315	301535	849757	450154	587893	351216	632106	178272	560029	240686	535575	651561	925360	575459	814811	274735	1.05526e+06	451119	657185	513614	579728	779889	931339	815787	412436	827512	637199	592323			234554
High	LVYHLGLPFSFLTFPYVEEAIK	[R].LVYHLGLPFSFLTFPYVEEAIK.[I]		1.92105e-12	0.000386037	1	1	182	P49908	P49908 [143-164]		0	2583.39	22	389808	1.08308e+06	796565	947499	1.16987e+06	1.70704e+06	1.3328e+06	1.08472e+06	743753	1.79781e+06	1.3275e+06	527275	1.1177e+06	1.35621e+06	1.53627e+06	940993	806571	1.10736e+06	1.38476e+06	1.35117e+06	1.99976e+06	1.73558e+06	964217	1.85956e+06	2.25793e+06	1.81416e+06	1.79488e+06	1.74398e+06	899035	1.85306e+06	898437	940331	698489	1.696e+06	1.78649e+06
High	LWAYLTIEQLLEK	[R].LWAYLTIEQLLEK.[R]		9.32472e-09	0.000386037	1	1	155	Q06033	Q06033 [557-569]		0	1619.9	13	177091	424421	276187	1.1648e+06	446921	466731	343009	257033	243380	690639	578335	128158	119526	228979	331238	375384	237051	419031	498070	335071	398584	427171	405337	396281	553711	1.21865e+06	459147	344322	135551	442995	263996	196479	49738.2	297397	1.16144e+06
High	LVRPEVDVMCTAFHDNEETFLKK	[R].LVRPEVDVMCTAFHDNEETFLKK.[Y]	1xCarbamidomethyl [C10]; 1xOxidation [M9]	1.03571e-09	0.000386037	1	1	51	P02768	P02768 [139-161]		1	2794.35	23	476402			556195	1.10572e+06	1.06144e+06	948062	382101	932088	919932	885882	248332	415359	418222			1.20724e+06	828796	695165	524289	1.76152e+06	760344	646352	543259	472369	2.00301e+06	802593	765066	2.38445e+06	1.6599e+06	1.72602e+06	1.73975e+06	855760	1.43181e+06	1.13991e+06
High	LWAYLTINQLLAER	[K].LWAYLTINQLLAER.[S]		9.91206e-07	0.000386037	1	1	3	P19823	P19823 [583-596]		0	1703.95	14		112799		215493		249894		199579	113499	205356	214057		92632				116865	170999	221015		126100	74105.8		109552	118376	254230	212784	153450		143029		187253	146621
High	LWAYLTIQQLLEQTVSASDADQQALR	[R].LWAYLTIQQLLEQTVSASDADQQALR.[N]		6.72267e-11	0.000386037	1	1	95	Q14624	Q14624 [547-572]		0	2961.53	26	126360	420805	230874	479526	316593	482325	257289	382873	165745	706727	267439		79225.9	178319	153056	246016	147756	173600	402482	296139	375887			216952	320493	602869	435258	229673	28880.6	277210	110128	260459	102604	203206	448312
High	IWHHTFYNELR	[K].IWHHTFYNELR.[V]		7.96434e-05	0.000386037	2	9	10	P60709; P68133	P60709 [85-95]; P68133 [87-97]		0	1515.75	11	772677	1.14354e+06	618818	1.14475e+06	936709	600812	687702	726664	648690	656978	651685	2.22948e+06	662508	1.39349e+06	931444	683646	1.95963e+06	3.39695e+06	1.16043e+06		1.08174e+06	1.31684e+06	417148	1.60562e+06	505209	1.13193e+06	794582	4.14807e+06		935790	1.37381e+06	3.14733e+06	3.69943e+06		1.49756e+06
High	IYGNQDTSSQLK	[R].IYGNQDTSSQLK.[K]		2.11809e-08	0.000386037	1	1	440	P19823	P19823 [476-487]		0	1353.66	12	5.09412e+07	3.50682e+07	6.02707e+07	4.38536e+07	2.86341e+07	3.78141e+07	3.88775e+07	4.01694e+07	4.51791e+07	2.9607e+07	3.74044e+07	4.20762e+07	3.6409e+07	3.13513e+07	4.58967e+07	3.3125e+07	4.02196e+07	3.62334e+07	4.35753e+07	3.94544e+07	2.93832e+07	2.87162e+07	4.39224e+07	3.31161e+07	4.00601e+07	4.15553e+07	4.13098e+07	3.54294e+07	3.49791e+07	3.74247e+07	4.17858e+07	3.33871e+07	4.06899e+07	2.57704e+07	3.30917e+07
High	LYGSEAFATDFQDSAAAK	[R].LYGSEAFATDFQDSAAAK.[K]		1.00094e-15	0.000386037	1	1	839	P01011	P01011 [160-177]		0	1891.87	18	6.76964e+07	4.06595e+07	4.7378e+07	5.43532e+07	5.3277e+07	4.47352e+07	4.20331e+07	4.43414e+07	4.74478e+07	5.15412e+07	6.22792e+07	5.28443e+07	4.53153e+07	6.15253e+07	5.23478e+07	6.3421e+07	6.28022e+07	4.08279e+07	4.81063e+07	4.65242e+07	3.75023e+07	4.91429e+07	4.43838e+07	5.46345e+07	5.8617e+07	5.01249e+07	4.52821e+07	3.59482e+07	5.26342e+07	4.80295e+07	4.37686e+07	4.05328e+07	4.90696e+07	3.87986e+07	5.57409e+07
High	LYHAFSAMK	[K].LYHAFSAMK.[K]	1xOxidation [M8]	0.0117394	0.000386037	1	1	613	P05155	P05155 [153-161]		0	1083.53	9	3.59308e+07	3.39271e+07	3.73501e+07	3.34884e+07	3.3461e+07	3.05306e+07	2.95526e+07	3.55655e+07	3.21594e+07	2.5907e+07	2.66152e+07	3.19518e+07	1.71433e+07	3.51363e+07	3.43763e+07	7.30257e+06	2.7733e+07	3.3214e+07	3.57063e+07	2.62685e+07	2.5611e+07	1.60732e+07	3.18472e+07	2.94083e+07	6.93538e+06	3.32381e+07	8.22715e+06	2.33475e+07	3.58113e+07	6.92634e+06	3.44039e+07	1.43449e+07	3.04689e+07	1.02534e+07	2.30186e+07
High	LYHSEAFTVNFGDTEEAK	[K].LYHSEAFTVNFGDTEEAK.[K]		7.52229e-21	0.000386037	1	1	8957	P01009	P01009 [161-178]		0	2057.95	18	3.38795e+08	4.00467e+08	4.40123e+08	3.38313e+08	3.64008e+08	1.97838e+08	3.42111e+08	2.45358e+08	2.73127e+08	3.11845e+08	3.50751e+08	2.90896e+08	3.30957e+08	4.4093e+08	2.90411e+08	3.26783e+08	3.73467e+08	3.74292e+08	2.96009e+08	3.38471e+08	3.0031e+08	2.7631e+08	3.66285e+08	3.66196e+08	3.64347e+08	2.76261e+08	3.06961e+08	2.94078e+08	3.13769e+08	3.71948e+08	3.59033e+08	3.5343e+08	4.0706e+08	2.8646e+08	3.62342e+08
High	LYHSEAFTVNFGDTEEAKK	[K].LYHSEAFTVNFGDTEEAKK.[Q]		2.08229e-15	0.000386037	1	1	1111	P01009	P01009 [161-179]		1	2186.04	19	2.64792e+06	5.2494e+06	3.38037e+06	2.0364e+06	3.92931e+06	3.59999e+06	6.0097e+06	4.48311e+06	3.96101e+06	5.32161e+06	3.39991e+06	3.2732e+06	5.325e+06	2.2763e+06	3.09032e+06	2.84292e+06	3.61851e+06	3.74077e+06	7.86476e+06	2.34459e+06	4.99333e+06	2.2348e+06	2.62695e+06	2.11228e+06	3.33578e+06	2.90221e+06	2.96277e+06	3.36531e+06	5.17123e+06	4.0909e+06	6.55242e+06	3.10466e+06	4.00641e+06	2.7875e+06	4.90013e+06
High	IYHSHIDAPK	[R].IYHSHIDAPK.[D]		1.27346e-06	0.000386037	1	1	913	P00450	P00450 [178-187]		0	1180.61	10	6.32938e+07	3.51402e+07	7.2241e+07	7.25298e+07	4.15528e+07	4.34963e+07	4.09342e+07	4.41821e+07	3.80955e+07	2.8593e+07	4.8168e+07	4.43426e+07	3.63974e+07	3.02749e+07	2.9652e+07	3.49586e+07	5.14809e+07	3.11707e+07	5.00731e+07	5.43149e+07	3.76957e+07	3.23509e+07	4.83207e+07	3.81363e+07	7.16674e+07	5.67132e+07	5.11445e+07	2.84106e+07	4.17303e+07	6.09498e+07	3.58779e+07	2.17926e+07	3.14238e+07	1.89938e+07	4.56581e+07
High	LWAYLTIQELLAK	[R].LWAYLTIQELLAK.[R]		7.59554e-09	0.000386037	1	1	121	P19827	P19827 [565-577]		0	1561.9	13	356957	1.00205e+06	472567	1.18104e+06	697638	944158	490924	997881	555777	1.22101e+06	701348	255601	397001	503130	687483	578146	406227	503202	1.12099e+06	510080	723186	264668	255757	497058	668069	1.51457e+06	731004	619850	191972	581749	490111	369769	322968	644751	1.32298e+06
High	IYLYTLNDNAR	[K].IYLYTLNDNAR.[S]		4.61518e-07	0.000386037	1	1	116	P02751	P02751 [1881-1891]		0	1355.7	11	2.77747e+07	1.78223e+07	5.28726e+07	2.73291e+07	1.27588e+07	1.89086e+07	2.89272e+07	2.48288e+07	2.7601e+07	2.36944e+07	2.27678e+07	2.48927e+07	1.94267e+07	2.12879e+07	1.70916e+07	1.74639e+07	2.99067e+07	3.29447e+07	1.58577e+07	3.28001e+07	2.78005e+07	3.13967e+07	1.36224e+07	2.88108e+07	2.36756e+07	2.88902e+07	1.39608e+07	3.92949e+07	4.07746e+07	1.96706e+07	4.33588e+07	2.959e+07	3.91068e+07	1.29239e+07	2.0557e+07
High	LVRPEVDVMCTAFHDNEETFLK	[R].LVRPEVDVMCTAFHDNEETFLK.[K]	1xCarbamidomethyl [C10]; 1xOxidation [M9]	9.32543e-21	0.000386037	1	1	1407	P02768	P02768 [139-160]		0	2666.26	22	5.86148e+07	7.8575e+07	6.69386e+07	6.08534e+07	8.37209e+07	5.95437e+07	8.50504e+07	5.70512e+07	6.59041e+07	8.19957e+07	7.25027e+07	5.91591e+07	7.26466e+07	7.35817e+07	6.83412e+07	7.15609e+07	8.91691e+07	7.40522e+07	6.14838e+07	9.00815e+07	8.30597e+07	4.75947e+07	7.58684e+07	8.94479e+07	6.81659e+07	9.40321e+07	8.30136e+07	7.59709e+07	8.6536e+07	7.6064e+07	8.77735e+07	8.33664e+07	7.32836e+07	8.30158e+07	7.25569e+07
High	IVQLIQDTR	[R].IVQLIQDTR.[I]		0.000336056	0.000386037	1	1	87	P15169	P15169 [114-122]		0	1085.63	9	3.06896e+06	2.92142e+06	1.7439e+06	3.0549e+06	3.44228e+06	3.3314e+06	3.56964e+06	3.5371e+06	3.89833e+06	3.36524e+06	4.04316e+06	3.18186e+06	3.59458e+06	3.2798e+06	2.69349e+06	3.87203e+06	3.69642e+06	3.21396e+06	3.40854e+06	2.74294e+06	3.15962e+06	3.08996e+06	4.67053e+06	5.04836e+06	3.44215e+06	3.78811e+06	3.66188e+06	3.48393e+06	4.41747e+06	5.13783e+06	3.85794e+06	4.14606e+06	5.58599e+06	4.78256e+06	3.80275e+06
High	IVDLVSELKK	[K].IVDLVSELKK.[D]		0.00016406	0.000386037	1	1	113	P29622	P29622 [194-203]		1	1143.7	10		969850		901414	949281	938600	1.10741e+06	1.17451e+06	1.37163e+06	1.04889e+06	1.09328e+06	1.2607e+06	1.25932e+06	1.07164e+06	892965	1.12321e+06	1.06033e+06	1.38025e+06	1.22629e+06	1.09892e+06	1.63501e+06	1.29841e+06	1.4655e+06	1.32675e+06	1.49681e+06	1.20378e+06	993439	1.58277e+06	1.50072e+06	1.34915e+06	1.3333e+06	1.71889e+06	1.47924e+06	1.43034e+06	1.04769e+06
High	IVEGSDAEIGMSPWQVMLFR	[R].IVEGSDAEIGMSPWQVMLFR.[K]		9.60247e-17	0.000386037	1	1	285	P00734	P00734 [364-383]		0	2265.1	20	1.14923e+06	722548	865124	1.5263e+06	1.37247e+06	1.57664e+06	1.38209e+06	1.55464e+06	686396	1.73387e+06	1.7167e+06	1.43932e+06	2.20323e+06	1.82108e+06	2.5281e+06	1.77424e+06	825224	1.7804e+06	1.4286e+06	1.77376e+06	1.80454e+06	1.71175e+06	1.42803e+06	2.29961e+06	1.6332e+06	1.79583e+06	1.13845e+06	2.79465e+06	523849	1.53611e+06	1.04791e+06	1.38425e+06	1.72066e+06	2.36327e+06	2.68832e+06
High	IVEGSDAEIGMSPWQVMLFR	[R].IVEGSDAEIGMSPWQVMLFR.[K]	1xOxidation [M]	8.51948e-14	0.000386037	1	1	174	P00734	P00734 [364-383]		0	2281.1	20	2.85519e+06	852098	1.56831e+06	2.75207e+06	3.11726e+06	3.88018e+06	2.42433e+06	3.25434e+06	1.52522e+06	3.0712e+06		3.45398e+06	3.37154e+06	3.39993e+06	5.00944e+06	8.93386e+06	2.09058e+06	677223	1.63018e+06	1.16723e+06	4.2713e+06	3.9501e+06	3.62523e+06	3.97993e+06	4.12985e+06	4.1012e+06	1.74679e+06	4.06406e+06	647381	2.43351e+06	2.14883e+06	3.6716e+06	1.23944e+06	2.22491e+06	4.59538e+06
High	IVEGSDAEIGMSPWQVMLFR	[R].IVEGSDAEIGMSPWQVMLFR.[K]	2xOxidation [M11; M17]	5.5978e-14	0.000386037	1	1	175	P00734	P00734 [364-383]		0	2297.09	20	5.9703e+06	4.05889e+06	6.40905e+06	6.64837e+06	6.45411e+06	7.31894e+06	5.37327e+06	4.88316e+06	3.17214e+06	5.85805e+06	8.07553e+06	7.38512e+06	6.78241e+06	7.54263e+06	9.10764e+06	9.33765e+06	7.37781e+06	6.0422e+06	3.30664e+06	5.30316e+06	6.04131e+06	7.64036e+06	6.97058e+06	8.1126e+06	7.83382e+06	8.87277e+06	4.92067e+06	8.43159e+06	7.94458e+06	7.40237e+06	6.00467e+06	5.12427e+06	5.75901e+06	6.12009e+06	7.09388e+06
High	LVELAHQYK	[K].LVELAHQYK.[L]		3.26569e-05	0.000386037	1	1	443	P04114	P04114 [2361-2369]		0	1100.61	9	4.13058e+07	5.58762e+07	5.87767e+07	5.82954e+07	5.0691e+07	7.07365e+07	4.14771e+07	7.6961e+07	6.53925e+07	5.1636e+07	3.98387e+07	4.34979e+07	6.9352e+07	5.65846e+07	7.62336e+07	6.04311e+07	4.86688e+07	4.31282e+07	6.24545e+07	5.71634e+07	4.79385e+07	7.02581e+07	4.61154e+07	4.42377e+07	3.78009e+07	4.92206e+07	5.8981e+07	5.31266e+07	6.48941e+07	3.74485e+07	5.07101e+07	5.34124e+07	3.18286e+07	6.15919e+07	4.90877e+07
High	LVGFIDDAVK	[K].LVGFIDDAVK.[K]		4.49915e-05	0.000386037	1	1	509	P04114	P04114 [2393-2402]		0	1076.6	10	2.75644e+07	4.50289e+07	4.02461e+07	4.26618e+07	4.0532e+07	4.97561e+07	3.29411e+07	5.27481e+07	4.24303e+07	3.50696e+07	2.82399e+07	3.6806e+07	5.0061e+07	4.91503e+07	6.25543e+07	5.59356e+07	4.13089e+07	3.22875e+07	4.62442e+07	4.11353e+07	3.68081e+07	5.73053e+07	3.9369e+07	3.67551e+07	3.36467e+07	3.89206e+07	4.5441e+07	4.75163e+07	4.71754e+07	2.83111e+07	3.80004e+07	4.16318e+07	2.50552e+07	5.29886e+07	4.54682e+07
High	LVGFIDDAVKK	[K].LVGFIDDAVKK.[L]		0.00020269	0.000386037	1	1	148	P04114	P04114 [2393-2403]		1	1204.69	11	901443	1.16239e+06	1.21455e+06	1.74882e+06	1.05631e+06	1.23128e+06	1.26424e+06	1.39327e+06	1.51749e+06	1.25843e+06	1.22759e+06	1.12756e+06	2.44379e+06	2.00819e+06	1.87978e+06	2.11412e+06	1.8846e+06	1.59586e+06	2.14785e+06	2.29239e+06	1.43498e+06	2.49187e+06	1.67343e+06	1.21477e+06	1.00465e+06	2.16134e+06	1.87645e+06	2.738e+06	2.32264e+06	715829	1.78243e+06	2.58314e+06	1.59872e+06	2.56969e+06	1.28652e+06
High	LVHVEEPHTETVR	[R].LVHVEEPHTETVR.[K]		8.27326e-10	0.000386037	1	1	1816	P01023	P01023 [720-732]		0	1545.8	13	2.10438e+07	2.02071e+07	1.19074e+07	1.62225e+07	1.25873e+07	1.13308e+07	1.19921e+07	7.66233e+06	1.67406e+07	9.34144e+06	1.41007e+07	1.17638e+07	7.15588e+06	5.19454e+06	7.66497e+06	3.62113e+06	8.13533e+06	1.11317e+07	5.67184e+06	1.26187e+07	6.2616e+06	6.20266e+06	1.10318e+07	6.7913e+06	1.19752e+07	6.33522e+06	7.32569e+06	4.82516e+06	1.16044e+07	1.03522e+07	2.23723e+07	5.91942e+06	6.0603e+06	9.39853e+06	6.97212e+06
High	LVRPEVDVMCTAFHDNEETFLK	[R].LVRPEVDVMCTAFHDNEETFLK.[K]	1xCarbamidomethyl [C10]	3.96763e-27	0.000386037	1	1	927	P02768	P02768 [139-160]		0	2650.26	22	4.07753e+07	4.51373e+07	3.59624e+07	4.12134e+07	4.86871e+07	5.53471e+07	7.23868e+07	5.18736e+07	5.81538e+07	6.85898e+07	4.51442e+07	4.32114e+07	5.54145e+07	5.46988e+07	4.39621e+07	3.18208e+07	4.88163e+07	5.56304e+07	2.88026e+07	7.85486e+07	6.75846e+07	3.8957e+07	6.18358e+07	5.80608e+07	3.81424e+07	4.05694e+07	4.22385e+07	4.7143e+07	3.44052e+07	5.90021e+07	5.10647e+07	8.25266e+07	5.64219e+07	6.47346e+07	6.34924e+07
High	LVHVEEPHTETVRK	[R].LVHVEEPHTETVRK.[Y]		6.05258e-10	0.000386037	1	1	1012	P01023	P01023 [720-733]		1	1673.9	14	5.45683e+07	4.41143e+07	3.13721e+07	3.36995e+07	4.30001e+07	2.83313e+07	4.51758e+07	3.25126e+07	4.87854e+07	2.86213e+07	4.95538e+07	3.00103e+07	3.20888e+07	2.03501e+07	2.73292e+07	3.00319e+07	3.75379e+07	4.1578e+07	3.11326e+07	5.35099e+07	3.12091e+07	2.5796e+07	4.43145e+07	3.06788e+07	4.20848e+07	3.42567e+07	4.03108e+07	3.80519e+07	4.84308e+07	4.10724e+07	5.44933e+07	4.33802e+07	3.74574e+07	4.52922e+07	2.98808e+07
High	IVLGQEQDSYGGK	[K].IVLGQEQDSYGGK.[F]		1.91632e-09	0.000386037	1	1	560	P02743	P02743 [150-162]		0	1393.7	13	4.16218e+07	3.46103e+07	3.80059e+07	5.11182e+07	4.82934e+07	2.52902e+07	2.75025e+07	5.26361e+07	5.41111e+07	4.56206e+07	2.53899e+07	5.76037e+07	4.42988e+07	4.2712e+07	5.38193e+07	3.19114e+07	3.223e+07	2.58793e+07	3.64843e+07	2.58465e+07	4.70762e+07	3.80248e+07	2.50727e+07	3.58515e+07	4.34245e+07	2.65299e+07	2.48066e+07	3.74848e+07	2.98828e+07	2.58968e+07	4.06871e+07	3.43163e+07	3.3002e+07	3.72602e+07	4.22304e+07
High	IVLGQEQDSYGGKFDR	[K].IVLGQEQDSYGGKFDR.[S]		0.00014239	0.000386037	1	1	19	P02743	P02743 [150-165]		1	1811.89	16	679283		595630	1.56432e+06				1.29378e+06	1.79808e+06	1.08339e+06				1.16665e+06	1.56101e+06		1.23677e+06	1.01741e+06	1.24037e+06	846492	1.79768e+06	1.14976e+06		1.08922e+06	1.13962e+06	1.49275e+06		1.32728e+06	1.61697e+06			1.14715e+06		1.45167e+06	1.18693e+06
High	LVLLNAIYLSAK	[R].LVLLNAIYLSAK.[W]		1.13446e-06	0.000386037	1	1	178	P05155	P05155 [287-298]		0	1317.81	12	3.07776e+06	4.8662e+06	3.17608e+06	7.86232e+06	4.96751e+06	7.54833e+06	2.52151e+06	4.91112e+06	3.82838e+06	6.04296e+06	5.02267e+06	3.18788e+06	2.38443e+06	5.34764e+06	4.8496e+06	1.2981e+06	3.87476e+06	4.74981e+06	3.86216e+06	3.08488e+06	5.12867e+06	1.67447e+06	2.92057e+06	6.0242e+06	645874	7.22936e+06	1.53807e+06	3.90633e+06	2.2372e+06	954222	5.7068e+06	1.97569e+06	2.99607e+06	1.58201e+06
High	LVNELTEFAK	[K].LVNELTEFAK.[T]		0.000130289	0.000386037	1	1	934	P02769	P02769 [66-75]		0	1163.63	10	1.22942e+08	1.15544e+08	1.10082e+08	7.98531e+07	1.05693e+08	9.87179e+07	1.18019e+08	9.08036e+07	1.10718e+08	9.77173e+07	1.39158e+08	1.31891e+08	1.23111e+08	1.30652e+08	1.01505e+08	1.08945e+08	1.41002e+08	1.37058e+08	8.31359e+07	9.85942e+07	1.11655e+08	9.90004e+07	1.49902e+08	1.13183e+08	1.07445e+08	1.00727e+08	9.85921e+07	1.09357e+08	1.29218e+08	1.17541e+08	1.31239e+08	1.23684e+08	1.25708e+08	9.68619e+07	9.45423e+07
High	LVNEVTEFAK	[K].LVNEVTEFAK.[T]		3.16484e-06	0.000386037	1	1	18997	P02768	P02768 [66-75]		0	1149.62	10	1.88647e+10	1.44183e+10	1.69363e+10	8.62738e+09	1.06947e+10	9.5473e+09	1.27053e+10	9.32409e+09	9.90834e+09	6.04325e+09	1.06162e+10	1.10537e+10	7.27406e+09	1.06603e+10	1.09243e+10	6.3035e+09	8.24587e+09	7.33218e+09	9.44905e+09	5.48149e+09	1.13962e+10	8.00767e+09	9.3211e+09	6.16784e+09	8.4447e+09	5.63784e+09	5.69957e+09	6.21464e+09	1.02651e+10	6.79223e+09	7.95048e+09	1.04779e+10	1.14283e+10	1.01254e+10	7.52079e+09
High	LVNGQSHISLSK	[K].LVNGQSHISLSK.[A]		2.60139e-07	0.000386037	2	2	359	P0C0L4; P0C0L5	P0C0L4 [305-316]; P0C0L5 [305-316]		0	1282.71	12	5.67082e+07	3.92527e+07	3.60648e+07	5.59263e+07	2.98925e+07	3.68937e+07	2.36462e+07	4.60864e+07	3.99425e+07	4.18431e+07	3.25538e+07	3.77988e+07	3.47114e+07	3.44524e+07	3.0312e+07	1.83386e+07	3.62411e+07	5.51955e+07	3.5559e+07	3.00165e+07	4.09977e+07	4.74501e+07	7.13203e+06	3.16506e+07	5.28239e+07	1.99228e+07	2.9522e+07	3.36365e+07	2.78218e+07	3.12147e+07	2.93627e+07	3.93727e+07	3.43903e+07	3.28144e+07	2.19538e+07
High	LVPFATELHER	[K].LVPFATELHER.[L]		2.92363e-08	0.000386037	1	1	1034	P06727	P06727 [80-90]		0	1311.71	11	3.39211e+07	2.76017e+07	3.7229e+07	1.65354e+07	2.82708e+07	2.25867e+07	2.43549e+07	2.39859e+07	2.40411e+07	3.47465e+07	2.02315e+07	3.54861e+07	2.5692e+07	2.8305e+07	2.83643e+07	3.1117e+07	2.39507e+07	2.26426e+07	2.66392e+07	2.27265e+07	2.82156e+07	2.69885e+07	2.6427e+07	2.47109e+07	5.91661e+07	2.64641e+07	1.68393e+07	2.84141e+07	3.20592e+07	1.86246e+07	1.67231e+07	4.11625e+07	2.85128e+07	2.94689e+07	2.32281e+07
High	IVQILPWEQNEQVK	[K].IVQILPWEQNEQVK.[N]		2.21868e-09	0.000386037	1	1	381	P04114	P04114 [577-590]		0	1723.94	14	1.73476e+07	2.99408e+07	2.25804e+07	3.2743e+07	2.77882e+07	3.80019e+07	2.47122e+07	4.52322e+07	2.99392e+07	3.06258e+07	1.89348e+07	2.31389e+07	3.57505e+07	2.66652e+07	4.33914e+07	3.25535e+07	2.05623e+07	1.96086e+07	3.18716e+07	2.9385e+07	2.82061e+07	3.4065e+07	2.3007e+07	2.40878e+07	2.15192e+07	2.52414e+07	2.77254e+07	2.80703e+07	2.87345e+07	1.97698e+07	2.27452e+07	3.09989e+07	1.66871e+07	4.14255e+07	2.81014e+07
High	IVIEYVDR	[R].IVIEYVDR.[I]		0.00912631	0.000386037	1	1	176	P05156	P05156 [407-414]		0	1006.56	8	1.88686e+07	1.6939e+07	1.38482e+07	1.69452e+07	1.41432e+07	1.33175e+07	1.38703e+07	1.51791e+07	1.54746e+07	1.35343e+07	1.44125e+07	1.54999e+07	1.51367e+07	1.53711e+07	1.00166e+07	1.35943e+07	1.59101e+07	1.57261e+07	1.40854e+07	8.48818e+06	1.25097e+07	1.67676e+07	1.27044e+07	1.52396e+07	1.71911e+07	1.31434e+07	1.03132e+07	1.41742e+07	1.27966e+07	1.33888e+07	1.50634e+07	1.29498e+07	1.39422e+07	1.47573e+07	1.47202e+07
High	SLHTLFGDELCK	[K].SLHTLFGDELCK.[V]	1xCarbamidomethyl [C11]	0.00827994	0.000386037	1	1	13	P02769	P02769 [89-100]		0	1419.69	12	1.44335e+06	486047	621109	560138	398633	269086	302918	262008	398873	152996	263388	280834	316679	305122	175230	160403	237718	132554	115406	117224	145807	94592.7	197301	119300	63570	88063.7	144221	79109	91719.5	134722	224833	176281	184515	117492	71515.1
High	SLHTLFGDK	[K].SLHTLFGDK.[L]		6.51061e-06	0.000386037	1	1	12649	P02768	P02768 [89-97]		0	1017.54	9	7.27585e+09	6.7407e+09	4.4538e+09	2.55135e+09	7.80847e+09	3.16174e+09	7.1518e+09	2.94457e+09	5.5584e+09	4.74755e+09	6.12398e+09	3.27879e+09	8.26881e+09	3.46476e+09	7.48249e+09	3.62766e+09	3.67034e+09	7.57735e+09	7.38467e+09	7.92841e+09	6.96103e+09	4.12615e+09	7.43665e+09	4.91871e+09	4.74893e+09	5.20912e+09	6.20241e+09	5.02174e+09	5.58622e+09	5.60018e+09	8.8877e+09	7.72175e+09	6.42553e+09	5.43823e+09	5.61807e+09
High	SLLEGEGSSGGGGR	[R].SLLEGEGSSGGGGR.[G]		1.26126e-06	0.000386037	1	1	96	P13645	P13645 [451-464]		0	1262.6	14	8.574e+06	6.90645e+06	9.71843e+06	6.22575e+06	1.35873e+07	7.54663e+06	8.14136e+06	7.50149e+06	7.435e+06	1.2008e+07	1.08603e+07	9.12135e+06	7.26972e+06	6.95756e+06	6.96221e+06	6.49755e+06	7.4715e+06	6.27532e+06	8.64927e+06	7.81475e+06	5.24479e+06	5.62163e+06	7.91643e+06	4.79311e+06	6.69406e+06	8.19865e+06	7.62689e+06	4.64983e+06	7.92931e+06	6.50166e+06	1.06961e+07	6.02713e+06	7.68621e+06	7.49454e+06	5.42479e+06
High	VSEGNHDIALIK	[K].VSEGNHDIALIK.[L]		5.88084e-07	0.000386037	1	1	71	P03952	P03952 [477-488]		0	1295.7	12	2.31583e+06	1.27478e+06	2.01256e+06		1.55542e+06	1.51698e+06	1.85519e+06	1.35699e+06	1.82138e+06	1.23966e+06	1.38155e+06	1.42226e+06	1.37144e+06	1.25913e+06	1.67529e+06	1.49078e+06	2.0581e+06	1.34443e+06	1.27453e+06	1.65272e+06	991705	1.4997e+06	1.19545e+06	1.34497e+06	1.62409e+06	1.58197e+06	1.62707e+06	1.59579e+06	1.69502e+06	1.68803e+06	1.42174e+06	1.76621e+06	1.71142e+06	1.37294e+06	1.99808e+06
High	VSFELFADK	[R].VSFELFADK.[V]		0.0027804	0.000386037	1	1	15	P62937	P62937 [20-28]		0	1055.54	9	520840	416769	714361	414587		311601	426462	381655	353046	264227	471670	617577	301780	541278	378547		479078	523899	318202	242419	248188	297847	463596	422027	218068	224314	737804	555169	271260	374524	340433	492709	502761		420643
High	VSFLSALEEYTK	[K].VSFLSALEEYTK.[K]		6.7555e-09	0.000386037	1	1	4476	P02647	P02647 [251-262]		0	1386.72	12	8.83386e+08	6.74757e+08	8.61612e+08	6.20864e+08	7.45729e+08	6.42818e+08	8.48369e+08	8.03383e+08	5.08791e+08	6.12312e+08	6.63974e+08	7.61175e+08	8.022e+08	7.60544e+08	7.79066e+08	8.32884e+08	5.63675e+08	7.88987e+08	7.02733e+08	6.41626e+08	5.84508e+08	5.77307e+08	9.57644e+08	8.54758e+08	1.08375e+09	7.32969e+08	7.00364e+08	6.93912e+08	7.30261e+08	1.19743e+09	8.17314e+08	6.64247e+08	9.08658e+08	7.12881e+08	7.21333e+08
High	VSFLSALEEYTKK	[K].VSFLSALEEYTKK.[L]		5.03969e-09	0.000386037	1	1	197	P02647	P02647 [251-263]		1	1514.81	13	2.30881e+06	3.57269e+06	2.48882e+06	2.03919e+06	3.43826e+06	3.15984e+06	7.07256e+06	5.03347e+06	3.75272e+06	3.47159e+06	3.19975e+06	3.44075e+06	4.526e+06	1.70378e+06	2.50186e+06	4.42568e+06	3.98811e+06	3.30687e+06	4.5983e+06	6.06364e+06	4.23979e+06	1.80327e+06	2.23157e+06	2.68187e+06	4.82006e+06	6.75143e+06	4.02059e+06	4.61594e+06	3.23027e+06	7.80347e+06	3.88059e+06	1.00605e+07	1.15955e+07	3.62311e+06	2.39472e+06
High	VSGYTLTELSMHWVR	[K].VSGYTLTELSMHWVR.[Q]	1xOxidation [M11]	1.92358e-07	0.000386037	1	1	9	A0A0C4DH33	A0A0C4DH33 [43-57]		0	1794.88	15			189862	125765			221319			221840	433761		124300		304929	221376				219842	355094				789818	153094			216639		353262	178183	216852	774413	257862
High	VSHLLGINVTDFTR	[K].VSHLLGINVTDFTR.[G]		4.25934e-05	0.000386037	1	1	5	P35579	P35579 [374-387]		0	1571.85	14																	178437	226437										335672			142100	122470	199276
High	VSITSITVENVFVK	[K].VSITSITVENVFVK.[Y]		5.10157e-08	0.000386037	1	1	288	P01031	P01031 [1563-1576]		0	1535.87	14	3.35358e+06	4.8696e+06	4.69214e+06	4.68699e+06	4.5249e+06	3.83785e+06	3.94538e+06	3.58578e+06	3.49757e+06	4.91278e+06	3.82964e+06	2.75983e+06	4.08442e+06	5.49516e+06	4.78247e+06	3.9481e+06	4.3646e+06	5.12635e+06	3.32279e+06	3.73994e+06	4.03703e+06	4.23874e+06	4.12529e+06	4.13649e+06	4.95852e+06	4.54162e+06	5.8297e+06	4.49638e+06	2.18659e+06	5.50987e+06	3.68652e+06	3.11044e+06	3.93452e+06	3.80142e+06	4.97779e+06
High	VSNGAGTMSVSLVADENPFAQGALK	[K].VSNGAGTMSVSLVADENPFAQGALK.[S]		5.30482e-08	0.000386037	1	1	7	P06396	P06396 [303-327]		0	2463.22	25						259668	233526	261412		149076			221938	188157							270009		342041	228547										305954
High	VSNGAGTMSVSLVADENPFAQGALK	[K].VSNGAGTMSVSLVADENPFAQGALK.[S]	1xOxidation [M8]	2.71723e-14	0.000386037	1	1	312	P06396	P06396 [303-327]		0	2479.21	25	7.10511e+06	8.53648e+06	7.2105e+06	6.62055e+06	7.0461e+06	8.1434e+06	8.60463e+06	5.40974e+06	6.73943e+06	6.86972e+06	6.67843e+06	6.64944e+06	6.3062e+06	6.74582e+06	7.01676e+06	6.58293e+06	6.98079e+06	6.64497e+06	7.24922e+06	6.19302e+06	7.17144e+06	6.22706e+06	1.01278e+07	6.44213e+06	4.78572e+06	6.58028e+06	6.80614e+06	5.13754e+06	6.40194e+06	6.30919e+06	5.3804e+06	6.29841e+06	5.48661e+06	6.73831e+06	7.33336e+06
High	VSNQTLSLFFTVLQDVPVR	[K].VSNQTLSLFFTVLQDVPVR.[D]		8.81564e-12	0.000386037	1	1	295	P01023	P01023 [1422-1440]		0	2163.18	19	620330	1.78502e+06	602607	1.27826e+06	1.23074e+06	1.433e+06	1.39271e+06	1.09884e+06	1.25383e+06	2.10992e+06	2.46109e+06	451885	1.01768e+06	875393	816689	1.27972e+06	836446	1.59134e+06	1.26724e+06	1.6471e+06	1.71941e+06	886627	853024	1.41137e+06	1.45652e+06	2.27952e+06	1.73575e+06	1.07318e+06	790111	1.16608e+06	1.92576e+06	2.26899e+06	872968	1.28399e+06	1.58634e+06
High	VSNWDSGVPDR	[K].VSNWDSGVPDR.[F]		0.000155582	0.000386037	1	1	40	A0A075B6S6	A0A075B6S6 [76-86]		0	1231.57	11	517676			452214						238399					212443						445682	235721				366516		600595	298846			1.07908e+06		839691
High	VSTAFVYTK	[R].VSTAFVYTK.[N]		0.00213449	0.000386037	1	1	189	P04114	P04114 [3704-3712]		0	1015.55	9
High	VSTQNLLLLLTDNEAWNGFVAAAELPR	[K].VSTQNLLLLLTDNEAWNGFVAAAELPR.[N]		2.21329e-10	0.000386037	1	1	58	O14791	O14791 [79-105]		0	2955.56	27	75741.6	140932	134077	634203	424355	1.13654e+06	154631	237867	84995.1	708113	398692		272902	279965	482109	412262	131919	292190	828029	663095	662991	441360	75745.6	130557	553069	1.62676e+06	584522	420185	87861.7	407647	147548	64632.4		382240	409859
High	VSTQNLLLLLTDNEAWNGFVAAAELPRNEADELRK	[K].VSTQNLLLLLTDNEAWNGFVAAAELPRNEADELRK.[A]		0.000121334	0.000386037	1	1	6	O14791	O14791 [79-113]		2	3911.03	35																			299164	255246						657174		353731						144907
High	VSVFVDWIHK	[R].VSVFVDWIHK.[V]		0.000633106	0.000386037	1	2	148	Q2TV78	Q2TV78 [701-710]		0	1229.67	10	117082	656803	674435	292535	601160	517790	688872	502444	437551	213186	437051	445538	361230	594754	340312	544946	472784	670643	713969	318386	369544	628919	511356	240877	712189	637158	210490	213507	260384	397755	311773	414827	530520	473817	503175
High	VSVFVPPR	[K].VSVFVPPR.[D]		0.0027804	0.000386037	2	2	897	P04220; P01871	P04220 [51-58]; P01871 [113-120]		0	900.53	8	3.4439e+07	3.72356e+07	3.16072e+07	3.06884e+07	2.29651e+07	6.79743e+07	2.39838e+07	2.34177e+07	6.08873e+07	3.89216e+07	2.31582e+07	2.08336e+07	4.34226e+07	1.48253e+07	2.1535e+07	1.74312e+07	2.94679e+07	1.49824e+07	1.77319e+07	4.62244e+07	4.6586e+07	1.72961e+07	8.77102e+07	2.96415e+07	2.82158e+07	3.1464e+07	2.75567e+07	2.13344e+07	6.39907e+07	5.23923e+07	2.53822e+07	1.49039e+07	2.60604e+07	2.89167e+07	3.12258e+07
High	VSVHPDYR	[R].VSVHPDYR.[Q]		0.0120009	0.000386037	1	1	192	P00736	P00736 [540-547]		0	972.49	8	7.46803e+06	6.06494e+06	6.58647e+06	5.92191e+06	7.02874e+06	5.86952e+06	6.5365e+06	5.94839e+06	5.77979e+06	5.07471e+06	6.58849e+06	5.19124e+06	5.90437e+06	5.90983e+06	7.08888e+06	5.97048e+06	6.97646e+06	5.57497e+06	5.67379e+06	5.41936e+06	3.20302e+06	5.8964e+06	6.49848e+06	5.16669e+06	5.88434e+06	4.58629e+06	6.27456e+06	4.59739e+06	5.74229e+06	5.61727e+06	6.53361e+06	5.09788e+06	4.57727e+06	5.19393e+06	4.69464e+06
High	VSEADSSNADWVTK	[K].VSEADSSNADWVTK.[Q]		3.55442e-12	0.000386037	1	1	555	P00751	P00751 [324-337]		0	1508.69	14	5.8747e+07	5.4248e+07	6.86103e+07	6.87729e+07	4.70378e+07	3.18813e+07	4.07056e+07	4.15092e+07	4.27567e+07	4.75367e+07	4.42673e+07	5.64179e+07	3.61169e+07	5.20556e+07	4.30019e+07	4.83137e+07	5.13527e+07	5.07807e+07	4.62405e+07	4.8157e+07	4.15583e+07	5.11047e+07	3.62763e+07	4.66766e+07	4.92757e+07	3.77639e+07	4.32909e+07	4.07535e+07	4.45921e+07	4.53602e+07	3.34736e+07	2.88472e+07	4.47682e+07	4.01249e+07	3.67194e+07
High	VSASPLLYTLIEK	[K].VSASPLLYTLIEK.[T]		9.35444e-07	0.000386037	1	1	21	P02786	P02786 [496-508]		0	1433.83	13	178613	457158	154601	293710	256503	261261	249481	114436	214447	261986	134920	270514	274527	175491	257135	354651	203827	293063	269138	168322	318826	153205	260525	99035.5	138562	280939	154939	100114	236283	221412	199182	190186	201442	219583	204755
High	VSALLTPAEQTGTWK	[K].VSALLTPAEQTGTWK.[L]		1.2469e-09	0.000386037	1	1	428	P04114	P04114 [1968-1982]		0	1601.85	15	1.44935e+07	2.2515e+07	1.66518e+07	2.37406e+07	2.15507e+07	2.45421e+07	1.37564e+07	2.90845e+07	2.59873e+07	2.16471e+07	1.59495e+07	1.75612e+07	2.97238e+07	2.37069e+07	2.81847e+07	2.55442e+07	2.04124e+07	1.74549e+07	2.57317e+07	2.18158e+07	2.03207e+07	3.22933e+07	1.76495e+07	1.7952e+07	1.79381e+07	2.08198e+07	1.96128e+07	2.49915e+07	2.5512e+07	1.26632e+07	2.12506e+07	2.53379e+07	1.44828e+07	2.94216e+07	1.88693e+07
High	VREYYFAEAQIADFSDPAFISK	[K].VREYYFAEAQIADFSDPAFISK.[T]		5.63899e-15	0.000386037	1	1	177	P05546	P05546 [240-261]		1	2567.25	22	3.10535e+06	2.88872e+06	3.99015e+06	3.29963e+06	3.76231e+06	4.1156e+06	3.48714e+06	3.62784e+06	2.58336e+06	3.183e+06	2.9014e+06	3.07915e+06	3.59487e+06	4.63764e+06	3.70685e+06	3.86017e+06	3.82206e+06	4.05126e+06	3.70787e+06	4.01172e+06	3.43772e+06	4.14078e+06	3.40414e+06	3.94269e+06	3.39371e+06	4.73966e+06	5.55859e+06	5.69087e+06	2.94032e+06	4.37588e+06	2.54504e+06	2.43478e+06	3.64855e+06	3.72734e+06	2.98119e+06
High	VPTGGVEEGLLER	[K].VPTGGVEEGLLER.[H]		2.31271e-08	0.000386037	1	1	213	P01880	P01880 [210-222]		0	1355.72	13	347415	361700	5.28045e+06	661057	563882	1.23853e+06	3.33613e+06	1.01272e+07	299002	8.59864e+06	297750	4.88585e+06	3.35119e+06	7.52709e+06	9.06021e+06	2.74441e+06	306951	700115	4.46851e+07	3.64702e+06	1.37463e+06	51565.4	225893	857683	1.34569e+06	2.3262e+06	1.17734e+06	1.77064e+06	5.70779e+06	1.58163e+06	1.07367e+06	4.05851e+06	897526	811884	1.85522e+06
High	VPTVEPLDSLTLFLFR	[R].VPTVEPLDSLTLFLFR.[G]		3.28785e-06	0.000386037	1	1	68	P13598	P13598 [136-151]		0	1847.03	16	90734.1	195924	110498	111507		140988	123349	111432	109084	133610	123308	74142.4	151190	82646.4	143922	156699	95097.6	142965	78916.3		160475	127954		114474		128332	97974	120995		91974.9	142891	110253	87796.6		199586
High	VPVAVQGEDTVQSLTQGDGVAK	[R].VPVAVQGEDTVQSLTQGDGVAK.[L]		3.45205e-24	0.000386037	1	1	1502	P01024	P01024 [387-408]		0	2198.13	22	1.93391e+08	1.95282e+08	1.68505e+08	2.03144e+08	1.85607e+08	1.64721e+08	1.67424e+08	1.54461e+08	1.62108e+08	1.45128e+08	1.76186e+08	1.91821e+08	1.46429e+08	1.82612e+08	1.7582e+08	1.76317e+08	1.92457e+08	1.60378e+08	1.98875e+08	1.42402e+08	1.75549e+08	1.89955e+08	1.11322e+08	1.69407e+08	1.70378e+08	1.33974e+08	1.77598e+08	1.8849e+08	1.56289e+08	1.3779e+08	1.34663e+08	1.29057e+08	1.66218e+08	1.35558e+08	1.38752e+08
High	VPVDPATYGQFYGGDSYIILYNYR	[K].VPVDPATYGQFYGGDSYIILYNYR.[H]		2.31858e-23	0.000386037	1	1	278	P06396	P06396 [458-481]		0	2771.34	24	3.64262e+06	3.841e+06	3.70114e+06	3.48225e+06	2.81362e+06	4.63225e+06	7.53976e+06	4.37757e+06	4.58735e+06	6.77796e+06	4.91455e+06	3.95362e+06	4.96144e+06	5.06138e+06	6.323e+06	5.48579e+06	4.64208e+06	5.58962e+06	4.42699e+06	4.07498e+06	6.05426e+06	4.99907e+06	6.75858e+06	5.45097e+06	4.39965e+06	6.35637e+06	7.82794e+06	6.41671e+06	4.00345e+06	4.55247e+06	3.92879e+06	4.40443e+06	4.34179e+06	7.53167e+06	4.6275e+06
High	VQAAVGTSAAPVPSDNH	[K].VQAAVGTSAAPVPSDNH.[-]		1.23481e-13	0.000386037	1	1	558	P02649	P02649 [301-317]		0	1620.8	17	3.54296e+07	2.63422e+07	2.10417e+07	3.65561e+07	1.97606e+07	2.74357e+07	2.04354e+07	3.06236e+07	3.24586e+07	1.76993e+07	1.74762e+07	2.54213e+07	2.54056e+07	1.81738e+07	3.16662e+07	2.26849e+07	2.15919e+07	2.12521e+07	3.06842e+07	1.88075e+07	7.54616e+07	2.74664e+07	2.20783e+07	3.7383e+07	2.1621e+07	2.30068e+07	2.13194e+07	1.95277e+07	2.2861e+07	1.46845e+07	2.97078e+07	1.7787e+07	1.26877e+07	2.55145e+07	2.19716e+07
High	VQALEEANNDLENK	[K].VQALEEANNDLENK.[I]		4.70665e-09	0.000386037	1	1	149	P35527	P35527 [171-184]		0	1586.77	14	2.54059e+06	3.8372e+06	3.67034e+06	2.46484e+06	1.72448e+07	7.18492e+06	3.85576e+06	1.42296e+06	4.11527e+06	1.92478e+07	1.33633e+07	4.05448e+06	839142	3.42983e+06	3.8273e+06	1.73484e+06	2.1635e+06	2.5686e+06	1.20004e+06	3.56117e+06	2.35021e+06	3.29822e+06	2.24244e+06	1.56014e+06	345514	1.50868e+06	1.74457e+06	987622	1.66108e+06	1.05325e+06	2.1177e+06	1.12274e+06	1.79526e+06	1.01095e+06	2.08987e+06
High	VQEAHLTEDQIFYFPK	[R].VQEAHLTEDQIFYFPK.[Y]		2.83238e-13	0.000386037	1	1	148	P07360	P07360 [169-184]		0	1964.98	16	5.73634e+06	4.11e+06	4.10169e+06	5.47256e+06	5.26311e+06	3.71812e+06	4.54816e+06	4.18486e+06	4.16918e+06	4.41661e+06	3.96321e+06	4.38664e+06	3.6574e+06	3.64692e+06	4.09813e+06	5.04232e+06	3.52807e+06	4.64675e+06	4.52422e+06	3.25193e+06	3.98011e+06	4.67422e+06	4.09513e+06	5.02795e+06	4.59885e+06	3.30702e+06	4.32543e+06	3.40959e+06	3.37959e+06	3.72279e+06	3.04082e+06	3.45691e+06	5.01433e+06	4.39034e+06	3.88608e+06
High	VQFELHYQEVK	[K].VQFELHYQEVK.[W]		1.59563e-08	0.000386037	1	1	828	P19823	P19823 [177-187]		0	1419.73	11	3.66965e+07	3.25275e+07	4.5494e+07	4.89223e+07	3.34811e+07	3.97754e+07	4.23943e+07	4.25908e+07	4.53552e+07	4.21238e+07	4.62982e+07	5.01119e+07	5.47333e+07	4.9032e+07	4.05063e+07	4.22913e+07	5.08493e+07	5.38577e+07	4.32428e+07	4.17181e+07	4.24643e+07	3.9828e+07	5.55472e+07	5.11825e+07	4.40573e+07	5.48491e+07	4.63845e+07	5.66746e+07	4.35208e+07	4.66688e+07	4.94591e+07	4.93817e+07	5.8926e+07	3.72673e+07	4.39691e+07
High	VSVQLEASPAFLAVPVEK	[R].VSVQLEASPAFLAVPVEK.[E]		1.76802e-14	0.000386037	1	1	1931	P01023	P01023 [824-841]		0	1884.05	18	6.25882e+07	6.33272e+07	6.05384e+07	7.79244e+07	5.37573e+07	3.5673e+07	4.8467e+07	3.70531e+07	4.79633e+07	4.58665e+07	5.92515e+07	2.91602e+07	3.61358e+07	3.16873e+07	3.81069e+07	4.07259e+07	4.76158e+07	5.00854e+07	2.79654e+07	4.67357e+07	2.77121e+07	2.65558e+07	8.42826e+07	4.01203e+07	4.98752e+07	2.8632e+07	4.38514e+07	3.51936e+07	3.71909e+07	5.0771e+07	5.34188e+07	3.12698e+07	2.78753e+07	4.55889e+07	4.74214e+07
High	VQGVEFSHR	[K].VQGVEFSHR.[L]		2.45447e-05	0.000386037	1	1	444	P04114	P04114 [1859-1867]		0	1058.54	9	2.60228e+07	4.50874e+07	4.27618e+07	3.22497e+07	3.9956e+07	5.06867e+07	2.84751e+07	5.362e+07	4.56936e+07	3.89009e+07	2.75448e+07	2.47794e+07	4.93218e+07	3.35377e+07	5.24639e+07	3.06816e+07	3.44433e+07	2.83827e+07	4.44498e+07	4.27167e+07	3.26384e+07	3.69036e+07	3.481e+07	2.22665e+07	2.5921e+07	3.37778e+07	3.78066e+07	3.37095e+07	4.12606e+07	2.21393e+07	3.62364e+07	3.71658e+07	2.20812e+07	3.90729e+07	2.92021e+07
High	VQLSNDFDEYIMAIEQTIK	[K].VQLSNDFDEYIMAIEQTIK.[S]		1.87017e-15	0.000386037	1	1	358	P01024	P01024 [1552-1570]		0	2257.11	19	1.61069e+07	1.77642e+07	1.31871e+07	2.37146e+07	1.87072e+07	1.79074e+07	2.02634e+07	2.00489e+07	1.60482e+07	2.05322e+07	2.12746e+07	1.17926e+07	1.92547e+07	2.70378e+07	2.52803e+07	1.69872e+07	1.17751e+07	2.13191e+07	1.85008e+07	1.92144e+07	2.5907e+07	2.64216e+07	2.07246e+07	1.98809e+07	2.41755e+07	1.85357e+07	2.23304e+07	2.25863e+07	7.25418e+06	1.70709e+07	1.50276e+07	1.4529e+07	1.57872e+07	2.05469e+07	1.83501e+07
High	VQLSNDFDEYIMAIEQTIK	[K].VQLSNDFDEYIMAIEQTIK.[S]	1xOxidation [M12]	6.00867e-17	0.000386037	1	1	675	P01024	P01024 [1552-1570]		0	2273.1	19	3.65416e+07	7.25463e+07	5.30788e+07	5.87792e+07	6.0943e+07	4.3743e+07	4.12507e+07	4.37465e+07	4.45265e+07	6.17105e+07	5.7126e+07	4.19076e+07	5.97308e+07	7.64604e+07	6.14181e+07	8.26794e+07	4.58533e+07	6.64405e+07	9.20315e+07	5.31281e+07	8.08883e+07	7.51457e+07	4.06783e+07	6.68907e+07	9.4106e+07	6.4078e+07	9.99236e+07	7.28242e+07	5.17837e+07	6.4891e+07	5.89574e+07	3.6773e+07	4.65277e+07	5.34304e+07	7.83902e+07
High	VQLYDLGLQIHK	[R].VQLYDLGLQIHK.[D]		7.61382e-08	0.000386037	1	1	153	P18428	P18428 [456-467]		0	1426.81	12	1.1448e+06	968574	1.61751e+06	291220	938159	868784	925073	773982	981941	582394	1.14294e+06	824978	769515	1.41727e+06	834437	1.09115e+06	1.10853e+06	968258	964367	836389	917503	1.07982e+06	831404	1.03573e+06	1.44826e+06	439034	955633	997621	890400	908856	729003	780911	982373	566880	982528
High	VQPYLDDFQK	[K].VQPYLDDFQK.[K]		0.000261243	0.000386037	1	1	2075	P02647	P02647 [121-130]		0	1252.62	10	1.02219e+09	8.87739e+08	1.25807e+09	7.5682e+08	9.62981e+08	8.88677e+08	1.06854e+09	7.86622e+08	7.77528e+08	7.19771e+08	9.50062e+08	1.22692e+09	1.14945e+09	1.07666e+09	7.17628e+08	1.1955e+09	1.0803e+09	1.13889e+09	8.7631e+08	9.54769e+08	8.45081e+08	8.48927e+08	1.34651e+09	1.13098e+09	1.33895e+09	9.20898e+08	6.29341e+08	9.00028e+08	1.15217e+09	1.47061e+09	1.298e+09	9.74536e+08	1.27647e+09	8.68684e+08	8.73305e+08
High	VQVLLGAHSLSQPEPSK	[K].VQVLLGAHSLSQPEPSK.[R]		5.10157e-08	0.000386037	1	1	50	P00746	P00746 [76-92]		0	1789.98	17	752436	915112	887831	646289	568948	940078	1.03124e+06	1.14262e+06	1.62845e+06	1.02946e+06	792306	757728	688294	780882	427059	650877	888600	641400	384260	379935	981780	875396	1.02103e+06	497615	445039	530688	448100	794748	424736	456374	1.26617e+06	922256	983497	768847	1.37708e+06
High	VQWKVDNALQSGNSQESVTEQDSK	[K].VQWKVDNALQSGNSQESVTEQDSK.[D]		6.90546e-08	0.000386037	1	1	66	P01834	P01834 [38-61]		1	2677.27	24	429364	335879		343613	513029	244994	543941	367645		615178	512173	529973	285406			542068		264314	364304	429334	597370	364792	562534		430373	669603	432641	427619	531701	393928	441961	550976		612775	747815
High	VREEVVTVGNSVNEGLNQPTDDSCFDPYTVSHYAVGDEWER	[K].VREEVVTVGNSVNEGLNQPTDDSCFDPYTVSHYAVGDEWER.[M]	1xCarbamidomethyl [C24]	2.2904e-20	0.000386037	1	1	34	P02751	P02751 [2183-2223]		1	4670.1	41	1.91228e+06	1.7108e+06	4.8261e+06	1.96438e+06	1.02434e+06	1.458e+06	2.94664e+06	2.68534e+06	2.0505e+06	2.48657e+06	1.81946e+06	1.8619e+06	1.54154e+06	1.60133e+06	1.48178e+06	1.38041e+06	2.30181e+06	2.6506e+06	1.45047e+06	2.90417e+06	2.40045e+06	1.99044e+06	909270	1.9926e+06	1.52144e+06	2.48874e+06	1.17761e+06	3.05886e+06	1.83254e+06	1.19821e+06	2.25208e+06	2.11882e+06	2.26656e+06	445968	2.00097e+06
High	VRESDEETQIK	[R].VRESDEETQIK.[V]		0.000562203	0.000386037	1	1	301	P04114	P04114 [4045-4055]		1	1333.66	11	1.14535e+07	1.68808e+07	1.15052e+07	1.49035e+07	1.40273e+07	1.82743e+07	1.14061e+07	2.46901e+07	1.85929e+07	1.39076e+07	1.10433e+07	1.3979e+07	2.44446e+07	1.19812e+07	2.04731e+07	1.57204e+07	1.21142e+07	8.7973e+06	2.4984e+07	1.392e+07	1.83142e+07	1.80236e+07	1.40512e+07	1.0508e+07	1.21944e+07	1.94521e+07	1.47489e+07	1.40418e+07	1.44165e+07	1.17436e+07	1.07469e+07	1.79578e+07	8.68397e+06	1.83651e+07	1.11166e+07
High	VQHIQLLQK	[K].VQHIQLLQK.[N]		0.000567002	0.000386037	1	1	1087	P02671	P02671 [149-157]		0	1106.67	9	4.34156e+08	2.30514e+08	4.31985e+08	3.03089e+08	2.1068e+08	2.58908e+08	2.89432e+08	2.06379e+08	3.09681e+08	2.13096e+08	3.1251e+08	2.37856e+08	2.32673e+08	2.53652e+08	2.34459e+08	2.52572e+08	3.73528e+08	2.67662e+08	2.64595e+08	2.79985e+08	2.46678e+08	2.49217e+08	2.27156e+08	2.63227e+08	1.99965e+08	2.59309e+08	2.44823e+08	2.73042e+08	2.67342e+08	2.80449e+08	2.53926e+08	3.10384e+08	3.56685e+08	1.40813e+08	2.97277e+08
High	VPTADLEDVLPLAEDITNILSK	[K].VPTADLEDVLPLAEDITNILSK.[C]		1.45792e-21	0.000386037	1	1	1309	P02774	P02774 [243-264]		0	2366.27	22	2.92143e+07	9.82871e+07	6.98042e+07	8.84629e+07	8.00178e+07	8.62067e+07	7.41894e+07	8.24116e+07	4.48659e+07	9.78297e+07	9.45028e+07	4.21233e+07	8.71926e+07	1.05251e+08	8.86757e+07	9.75318e+07	6.06917e+07	1.02485e+08	8.0906e+07	1.13212e+08	9.80616e+07	1.05862e+08	8.15534e+07	9.5807e+07	1.17069e+08	7.85694e+07	9.11147e+07	8.1661e+07	6.10892e+07	9.06511e+07	6.844e+07	4.91866e+07	4.70188e+07	9.02072e+07	1.06349e+08
High	VSWYQQPPGTAPK	[R].VSWYQQPPGTAPK.[L]		6.35507e-05	0.000386037	1	1	111	A0A075B6J9	A0A075B6J9 [54-66]		0	1458.74	13	1.48148e+06	1.3872e+06	1.57993e+06	1.46365e+06	748800	711411	744397	1.46907e+06	365854	1.70586e+06	882366	527107	1.84582e+06	1.86588e+06	814201	659920	1.6879e+06	715839	1.28726e+06	1.735e+06	2.06611e+06	1.02943e+06	651447	1.44935e+06	631609	2.43012e+06	1.38374e+06	569655	2.58006e+06	2.16928e+06	959573	1.18936e+06	760483	3.49641e+06	1.4114e+06
High	VTASDPLDTLGSEGALSPGGVASLLR	[R].VTASDPLDTLGSEGALSPGGVASLLR.[L]		1.37832e-24	0.000386037	2	2	524	P0C0L4; P0C0L5	P0C0L4 [980-1005]; P0C0L5 [980-1005]		0	2483.3	26	1.24727e+07	8.93303e+06	1.09244e+07	1.55359e+07	9.53314e+06	1.11859e+07	7.40145e+06	9.47981e+06	7.9572e+06	1.08258e+07	9.2354e+06	8.04499e+06	1.14519e+07	1.14102e+07	1.12681e+07	9.62863e+06	9.12917e+06	1.33481e+07	1.22727e+07	8.00172e+06	1.09135e+07	1.40477e+07	4.01174e+06	1.17766e+07	2.06207e+07	6.14801e+06	1.24105e+07	1.24854e+07	6.1194e+06	8.44348e+06	8.0576e+06	8.9644e+06	8.84988e+06	1.3293e+07	1.04809e+07
High	VTQVYAENGTVLQGSTVASVYK	[K].VTQVYAENGTVLQGSTVASVYK.[G]		1.5496e-12	0.000386037	1	1	86	P27169	P27169 [317-338]		0	2314.19	22	714256	431824	1.18691e+06	892319	461397	836554	573352	796193	543210		632352	1.28117e+06	612202	815048	1.18539e+06	534492	1.27794e+06	530098	741322	634474		539832	1.31104e+06	305536	495332		1.59325e+06	1.03532e+06	906319	1.01994e+06	598958	672078	899639		691884
High	VTSIQDWVQK	[K].VTSIQDWVQK.[T]		4.45828e-05	0.000386037	1	1	763	P00738	P00738 [392-401]		0	1203.64	10	9.74274e+08	4.93307e+08	7.41281e+08	5.99451e+08	6.06799e+08	5.30289e+08	2.87669e+08	4.86099e+08	4.91282e+08	2.96541e+08	4.184e+08	8.2766e+08	5.22371e+08	1.02216e+09	4.23446e+08	9.19412e+08	7.51151e+08	6.90025e+08	4.93283e+08	3.63424e+08	4.56253e+08	7.00436e+08	6.41834e+08	7.76899e+08	5.70177e+08	7.14652e+08	5.44795e+08	7.4211e+08	5.28762e+08	4.80689e+08	3.19227e+08	2.71892e+08	7.48958e+08	4.38338e+08	4.79969e+08
High	VTSIQHWVQK	[K].VTSIQHWVQK.[T]		4.50024e-06	0.000386037	1	1	84	P00739	P00739 [334-343]		0	1225.67	10	2.99596e+06	2.37302e+06	2.28761e+06	1.1797e+06	2.43757e+06	5.34638e+06	2.35446e+06	3.89839e+06	963869		1.22101e+06	1.09262e+06	2.13343e+06	2.03407e+06	2.59471e+06	1.71937e+06	1.87841e+06	2.24917e+06	1.298e+06	1.41117e+06	3.54632e+06	1.31953e+06	2.25501e+06	895380	1.07729e+06	3.82088e+06	1.91575e+06	2.75298e+06	1.04827e+06	2.48547e+06	2.90332e+06	1.5721e+06	2.87869e+06	2.10178e+06	1.76007e+06
High	VTTSQDMLSIMEK	[K].VTTSQDMLSIMEK.[L]	1xOxidation [M]	6.38648e-08	0.000386037	1	1	420	P05155	P05155 [403-415]		0	1498.71	13	9.99054e+06	9.08023e+06	8.59056e+06	9.1871e+06	1.00135e+07	1.01203e+07	1.04825e+07	1.34248e+07	9.09572e+06	7.40841e+06	9.20098e+06	1.13605e+07	5.2373e+06	1.1846e+07	7.50405e+06	2.14514e+06	7.72263e+06	1.16351e+07	5.91334e+06	6.49059e+06	7.55774e+06	4.93722e+06	1.10816e+07	1.33936e+07	1.30852e+06	6.60949e+06	1.48029e+06	8.69523e+06	7.04844e+06	1.16446e+06	8.68104e+06	4.02543e+06	1.04237e+07	3.91645e+06	9.90421e+06
High	VTTSQDMLSIMEK	[K].VTTSQDMLSIMEK.[L]	2xOxidation [M7; M11]	7.61382e-08	0.000386037	1	1	693	P05155	P05155 [403-415]		0	1514.71	13	3.28859e+07	3.04789e+07	4.25849e+07	3.56197e+07	3.07414e+07	2.9725e+07	2.6434e+07	2.70084e+07	2.57659e+07	1.26679e+07	2.83578e+07	1.98126e+07	1.2622e+07	3.1634e+07	3.24744e+07	4.97939e+06	2.7764e+07	3.04496e+07	2.99503e+07	2.20779e+07	1.30373e+07	7.02231e+06	1.47078e+07	1.84458e+07	5.0179e+06	1.69284e+07	6.23623e+06	1.45368e+07	2.06124e+07	2.79355e+06	2.08885e+07	6.271e+06	1.98198e+07	9.64466e+06	1.32593e+07
High	VTTVASHTSDSDVPSGVTEVVVK	[R].VTTVASHTSDSDVPSGVTEVVVK.[L]		6.20258e-20	0.000386037	1	1	407	P10909	P10909 [386-408]		0	2314.18	23	7.81354e+07	8.84854e+07	9.27379e+07	7.53573e+07	6.9912e+07	7.69503e+07	7.79153e+07	7.709e+07	7.84099e+07	7.22651e+07	8.4008e+07	8.18189e+07	8.83391e+07	8.97556e+07	5.44488e+07	8.50278e+07	7.97365e+07	8.0504e+07	5.22253e+07	6.04518e+07	7.45166e+07	7.45644e+07	9.08671e+07	8.56936e+07	8.07265e+07	8.15731e+07	5.50836e+07	7.80305e+07	7.56487e+07	8.69e+07	8.79747e+07	7.5497e+07	1.00305e+08	8.49118e+07	8.06142e+07
High	VTWAPPPSIDLTNFLVR	[R].VTWAPPPSIDLTNFLVR.[Y]		7.61425e-12	0.000386037	1	1	531	P02751	P02751 [1285-1301]		0	1926.05	17	1.07904e+07	9.94928e+06	2.78095e+07	1.41864e+07	6.56181e+06	9.30103e+06	1.22416e+07	1.22762e+07	9.73287e+06	1.37343e+07	1.11733e+07	8.66985e+06	9.56394e+06	1.10159e+07	1.1793e+07	9.342e+06	1.19499e+07	1.59878e+07	1.00391e+07	1.39478e+07	1.03542e+07	1.1954e+07	5.28957e+06	1.45037e+07	1.13072e+07	1.54207e+07	9.06079e+06	1.86289e+07	1.24605e+07	7.42053e+06	1.53529e+07	1.12052e+07	1.50519e+07	6.87496e+06	1.52544e+07
High	VTYDVSRDK	[K].VTYDVSRDK.[I]		0.000768676	0.000386037	1	1	76	P19827	P19827 [258-266]		1	1082.55	9	1.15925e+06	303385	688854	728322	611494	624848	738946	1.1235e+06	931066	374565	845935	716270	593880	582529	731374	684763	1.2639e+06	885363	871678	657217	570972	572997	711592	859830	790311	1.11058e+06	1.41938e+06	1.55223e+06	837910	672757	799011	902018	1.33738e+06	349112	857387
High	VTYTSQEDLVEK	[K].VTYTSQEDLVEK.[K]		1.20462e-07	0.000386037	1	1	184	P05156	P05156 [20-31]		0	1411.7	12	1.13097e+07	9.03394e+06	8.71026e+06	9.17026e+06	8.58003e+06	7.9739e+06	6.92029e+06	8.40433e+06	9.95751e+06	7.49844e+06	7.8953e+06	9.20671e+06	7.35258e+06	9.24224e+06	8.79811e+06	7.64706e+06	8.79337e+06	8.66932e+06	9.01115e+06	6.56046e+06	6.50627e+06	9.02609e+06	6.72693e+06	8.32318e+06	1.05582e+07	7.13919e+06	7.56279e+06	7.53984e+06	6.78899e+06	6.8356e+06	7.76439e+06	6.88788e+06	6.98126e+06	8.44698e+06	8.86429e+06
High	VVAEGFDFANGINISPDGK	[R].VVAEGFDFANGINISPDGK.[Y]		1.04593e-17	0.000386037	1	1	489	P27169	P27169 [215-233]		0	1949.96	19	7.29288e+06	1.43681e+07	1.95583e+07	1.32634e+07	1.32093e+07	1.55251e+07	1.09157e+07	1.33737e+07	1.25718e+07	1.10277e+07	8.902e+06	1.10264e+07	1.25121e+07	1.14689e+07	1.62268e+07	1.25762e+07	1.3102e+07	1.12432e+07	1.20978e+07	1.66011e+07	9.09158e+06	9.26097e+06	2.06039e+07	1.13509e+07	1.0559e+07	1.24432e+07	2.23002e+07	1.2394e+07	1.4524e+07	2.1164e+07	9.92162e+06	1.19773e+07	9.61051e+06	1.1862e+07	1.28747e+07
High	VVAGVANALAHK	[K].VVAGVANALAHK.[Y]		1.83211e-07	0.000386037	2	2	247	P02042; P68871	P02042 [134-145]; P68871 [134-145]		0	1149.67	12	8.10365e+06	1.0171e+07	3.87213e+06	5.53233e+06	1.09237e+07	1.11915e+07	8.44112e+06	5.45725e+06	1.04942e+07	4.93707e+06	6.48289e+06	4.58645e+06	1.13214e+07	7.16275e+06	6.98666e+06	7.77592e+06	6.40696e+06	9.65166e+06	8.64465e+06	1.38215e+08	1.09054e+07	6.91333e+06	8.46259e+06	7.61093e+06	6.49544e+06	6.43319e+06	2.13503e+07	9.12014e+06	1.23184e+08	1.01931e+07	7.51727e+06	1.11483e+07	5.62046e+06	1.92324e+07	7.47223e+06
High	VVAQGVGIPEDSIFTMADR	[R].VVAQGVGIPEDSIFTMADR.[G]		5.49159e-06	0.000386037	1	1	35	P02760	P02760 [167-185]		0	2005.01	19		354403	63565.8	664198	274607	881074	280539	1.46128e+06	821431	972023		567981	414036		960242	94384.7			281242	515415	281008	1.20014e+06	244954	371414	253951	109560	276229	237913				626089	327488	587661	494917
High	VVAQGVGIPEDSIFTMADR	[R].VVAQGVGIPEDSIFTMADR.[G]	1xOxidation [M16]	8.60288e-10	0.000386037	1	1	207	P02760	P02760 [167-185]		0	2021	19	2.36066e+06	4.30935e+06	3.23917e+06	3.19433e+06	2.87861e+06	4.38688e+06	2.8934e+06	4.54706e+06	3.1083e+06	4.89469e+06	2.16994e+06	4.01654e+06	2.46621e+06	2.27871e+06	5.09422e+06	3.0579e+06	1.97814e+06	2.00628e+06	5.75515e+06	2.24187e+06	2.9442e+06	5.47383e+06	3.24821e+06	3.66077e+06	3.44279e+06	2.40251e+06	3.76516e+06	2.33672e+06	2.67586e+06	1.30692e+06	3.01149e+06	4.58528e+06	2.629e+06	2.46957e+06	2.71169e+06
High	VVEESELAR	[R].VVEESELAR.[T]		0.000268162	0.000386037	1	1	109	P02748	P02748 [146-154]		0	1031.54	9	2.15181e+07	1.26139e+07	1.1707e+07	1.64092e+07	7.96451e+06	1.17486e+07	1.09778e+07	9.27868e+06	1.32732e+07	1.15569e+07	1.34592e+07	1.4209e+07	9.6358e+06	1.24332e+07	9.17189e+06	1.04856e+07	1.32909e+07	1.23733e+07	9.06028e+06	1.00381e+07	1.00636e+07	1.32903e+07	1.2304e+07	9.60007e+06	1.42659e+07	8.95802e+06	1.05668e+07	3.04913e+06	1.09118e+07	1.06698e+07	1.16225e+07	9.44005e+06	1.06805e+07	1.03881e+07	1.45635e+07
High	VVHFIYIAILSQK	[K].VVHFIYIAILSQK.[F]		0.000395909	0.000386037	1	1	24	P43652	P43652 [234-246]		0	1530.9	13	83126.8	143913	171555	127525				195325		385078	151340		106797	114709	141769	133257	141059	193182	176985	94825.7	235600		92787.1	93469	91773.8	214469	195703	230087		176058	93229.1	238187	147883	102255	141146
High	VVLGDQDLK	[K].VVLGDQDLK.[K]		0.00827994	0.000386037	1	1	191	Q14520	Q14520 [373-381]		0	986.552	9	7.08331e+06	6.40982e+06	8.81619e+06	5.51205e+06	4.80266e+06	5.88246e+06	4.32489e+06	5.38536e+06	5.73401e+06	4.41863e+06	5.10079e+06	5.74047e+06	5.14524e+06	6.80271e+06	6.85889e+06	5.45054e+06	5.99045e+06	4.71042e+06	4.294e+06	5.98392e+06	4.18809e+06	6.3903e+06	4.6019e+06	5.45602e+06	5.3214e+06	4.20824e+06	6.07247e+06	4.91968e+06	6.37768e+06	5.79967e+06	5.39078e+06	5.33237e+06	5.11269e+06	4.7848e+06	5.69583e+06
High	VVLHPNYHQVDIGLIK	[K].VVLHPNYHQVDIGLIK.[L]		2.01228e-13	0.000386037	1	1	479	P00739	P00739 [178-193]		0	1845.04	16	1.57821e+07	3.25683e+07	2.95808e+07	2.42726e+07	2.04847e+07	4.47326e+07	1.4477e+07	2.15912e+07	5.95646e+06	1.93775e+07	7.58046e+06	3.17849e+07	4.98615e+07	4.03631e+07	2.02125e+07	4.97495e+07	3.2132e+07	2.01513e+07	2.92728e+07	2.89716e+07	3.42967e+07	4.51715e+07	5.11923e+07	1.24211e+07	2.19777e+07	3.80163e+07	3.66639e+07	3.07081e+07	3.44004e+07	3.95855e+07	3.36856e+07	2.29048e+07	2.16687e+07	3.43262e+07	1.57415e+07
High	VTQEFHMK	[R].VTQEFHMK.[V]		0.00528572	0.000386037	1	1	328	P04114	P04114 [4178-4185]		0	1019.5	8	6.02105e+06	8.62179e+06	7.47122e+06	7.84471e+06	9.04497e+06	1.42449e+07	8.04743e+06	1.87467e+07	1.11653e+07	8.92784e+06	7.02883e+06	9.76651e+06	1.41941e+07	9.48506e+06	8.05615e+06	7.51622e+06	8.14461e+06	7.95583e+06	4.72471e+06	1.3772e+07	9.90788e+06	1.22407e+07	5.00247e+06	3.19492e+06	4.10721e+06	5.86229e+06	1.03566e+07	1.0129e+07	6.89747e+06	3.21026e+06	7.87232e+06	1.20142e+07	6.02015e+06	1.47831e+07	4.62598e+06
High	VTMTTDTSTSTAYMELR	[R].VTMTTDTSTSTAYMELR.[S]	2xOxidation [M3; M14]	4.90623e-12	0.000386037	1	1	139	A0A0C4DH31	A0A0C4DH31 [87-103]		0	1939.86	17	2.67926e+06	4.25077e+06	1.6934e+06	2.46859e+06	2.0475e+06	3.76003e+06	2.96813e+06	2.16104e+06	2.55845e+06	2.18764e+06	2.6788e+06	4.3021e+06	2.21676e+06	1.58194e+06	2.87553e+06	759481	2.21901e+06	2.20808e+06	2.28717e+06	2.05558e+06	3.5613e+06	1.82106e+06	1.56675e+06	1.21814e+06	1.20889e+06	3.36657e+06	2.83131e+06	2.51732e+06	4.15621e+06	2.82382e+06	1.87507e+06	1.71691e+06	1.47226e+06	1.97714e+06	4.12698e+06
High	VTMTTDTSTSTAYMELR	[R].VTMTTDTSTSTAYMELR.[S]	1xOxidation [M3]	0.00218671	0.000386037	1	1	1	A0A0C4DH31	A0A0C4DH31 [87-103]		0	1923.87	17
High	VTMTTDTSTSTAYMELR	[R].VTMTTDTSTSTAYMELR.[S]		5.43602e-10	0.000386037	1	1	43	A0A0C4DH31	A0A0C4DH31 [87-103]		0	1907.87	17	99401.7	217820		210776	173569	340053	358388	290290	394592	294778	213836	426318	232191	150305			90019.6	118801		388663	480288	177781	263025	103501	120103		198911	246264	151793	145518		240656	202248	441185	484608
High	VTDATETTITISWR	[R].VTDATETTITISWR.[T]		8.90216e-12	0.000386037	1	1	460	P02751	P02751 [1822-1835]		0	1593.81	14	6.66762e+06	6.13182e+06	1.66341e+07	9.79393e+06	3.12452e+06	5.33169e+06	1.02364e+07	6.07369e+06	6.36872e+06	5.92622e+06	5.64881e+06	3.41309e+06	5.11674e+06	5.84273e+06	5.13398e+06	4.05188e+06	6.72541e+06	7.26854e+06	3.92005e+06	7.81121e+06	7.20505e+06	5.8242e+06	3.02456e+06	7.1864e+06	4.96677e+06	5.57112e+06	3.72666e+06	8.45881e+06	5.30013e+06	2.93629e+06	8.73031e+06	5.14532e+06	6.90634e+06	3.42368e+06	5.8467e+06
High	VTEPISAESGEQVER	[R].VTEPISAESGEQVER.[V]		2.51906e-09	0.000386037	1	1	332	O14791	O14791 [306-320]		0	1630.79	15	1.62775e+07	1.66748e+07	1.76608e+07	1.22337e+07	1.09741e+07	1.84317e+07	7.19029e+06	1.13361e+07	7.12823e+06	1.17061e+07	5.56182e+06	1.28085e+07	1.34923e+07	1.2721e+07	1.39887e+07	1.36773e+07	1.08662e+07	1.03214e+07	1.25475e+07	1.51229e+07	1.22079e+07	1.26826e+07	1.40576e+07	6.71131e+06	1.14399e+07	1.34153e+07	1.3825e+07	1.36612e+07	1.73035e+07	1.18425e+07	1.29529e+07	5.84975e+06	9.07733e+06	1.24711e+07	9.7198e+06
High	VTFELTYEELLK	[K].VTFELTYEELLK.[R]		1.61953e-06	0.000386037	1	1	116	Q06033	Q06033 [150-161]		0	1484.79	12	1.71147e+06	1.85079e+06	2.09113e+06	3.58851e+06	1.987e+06	1.89521e+06	2.40237e+06	1.70246e+06	1.48503e+06	2.36579e+06	3.18163e+06	1.71674e+06	1.25281e+06	1.89513e+06	2.27983e+06	2.12098e+06	2.90464e+06	2.7839e+06	1.74514e+06	1.63115e+06	2.33266e+06	2.52934e+06	3.78119e+06	2.80958e+06	2.60533e+06	3.68426e+06	2.38561e+06	2.1465e+06	1.18973e+06	3.16586e+06	2.42532e+06	1.64143e+06	1.27175e+06	2.01373e+06	4.36316e+06
High	VTFQLTYEEVLK	[K].VTFQLTYEEVLK.[R]		2.8672e-07	0.000386037	1	1	248	P19827	P19827 [158-169]		0	1469.79	12	7.12128e+06	1.07714e+07	9.80674e+06	1.43679e+07	1.05876e+07	1.13893e+07	1.2427e+07	1.08308e+07	9.95153e+06	1.35773e+07	9.72327e+06	7.82511e+06	1.25853e+07	1.08177e+07	1.23755e+07	1.10656e+07	1.10173e+07	1.28941e+07	1.04831e+07	1.15645e+07	1.12362e+07	6.28193e+06	1.18354e+07	1.24145e+07	1.17697e+07	1.24737e+07	1.26675e+07	1.33691e+07	6.69714e+06	1.24545e+07	9.61973e+06	7.71649e+06	8.00578e+06	8.64236e+06	1.40808e+07
High	VTFQLTYEEVLKR	[K].VTFQLTYEEVLKR.[N]		5.03614e-07	0.000386037	1	1	143	P19827	P19827 [158-170]		1	1625.89	13	1.07572e+06	1.27434e+06	1.03743e+06	1.38956e+06	1.19401e+06	1.48303e+06	1.65928e+06	1.48356e+06	1.46474e+06	1.8976e+06	1.56668e+06	856314	1.76313e+06	1.34292e+06	1.27292e+06	1.46406e+06	1.35829e+06	1.57246e+06	1.91301e+06	1.49358e+06	2.06696e+06	795183	1.37913e+06	1.42343e+06	1.60285e+06	2.37659e+06	1.72936e+06	2.34172e+06	1.01051e+06	1.56484e+06	980644	1.31761e+06	2.0126e+06	1.08628e+06	1.61097e+06
High	VTGEGCVYLQTSLK	[K].VTGEGCVYLQTSLK.[Y]	1xCarbamidomethyl [C6]	7.59554e-09	0.000386037	1	1	1	P01023	P01023 [1316-1329]		0	1554.78	14	2.11238e+06	2.26894e+06	1.656e+06	2.16319e+06	1.98312e+06	1.32303e+06	1.77554e+06	1.2473e+06	1.92756e+06	1.26497e+06	2.59615e+06	1.29853e+06	1.92124e+06	1.34521e+06	1.24918e+06	1.5869e+06	1.8835e+06	2.45872e+06	1.20963e+06	1.68019e+06	1.36543e+06	1.20854e+06	2.11779e+06	1.82087e+06	1.74024e+06	1.17266e+06	1.07851e+06	1.53849e+06	1.86675e+06	1.48388e+06	2.44126e+06	1.51432e+06	1.37363e+06	1.55461e+06	1.41482e+06
High	VTIAQGGVLPNIQAVLLPK	[KR].VTIAQGGVLPNIQAVLLPK.[K]		2.34364e-05	0.000386037	1	10	12	Q16777	Q16777 [101-119]		0	1931.17	19	239158					90806.9											1.11309e+06	967725	1.26824e+06	1.35204e+06	667255	265864	727518	682998	721333	360839	511221	293993	345585	108926	478877	321492	721372
High	VTLEERLDK	[K].VTLEERLDK.[A]		0.00933283	0.000386037	1	1	82	P01024	P01024 [1527-1535]		1	1102.61	9	4.77173e+06	4.98038e+06	4.85117e+06	3.9647e+06	4.78241e+06	4.37708e+06	3.9095e+06	3.63193e+06	4.15452e+06	3.9428e+06	3.49718e+06	4.16294e+06	3.66414e+06	4.06345e+06	3.78915e+06	3.25583e+06	3.6933e+06	3.96397e+06	3.70566e+06	3.06829e+06	3.92873e+06	4.52072e+06	1.91536e+06	3.52597e+06	5.05152e+06	3.64715e+06	4.74269e+06	2.97298e+06	3.32081e+06	3.48747e+06	3.97025e+06	2.82623e+06	3.7619e+06	3.0722e+06	2.4805e+06
High	VTAAPQSVCALR	[R].VTAAPQSVCALR.[A]	1xCarbamidomethyl [C9]	1.98381e-05	0.000386037	1	1	158	P01023	P01023 [587-598]		0	1272.67	12	3.46013e+06	3.68443e+06	2.1626e+06	2.80316e+06	3.09867e+06	2.06078e+06	3.28298e+06	2.22293e+06	3.86726e+06	2.03024e+06	3.52242e+06	2.2254e+06	1.97049e+06	1.80835e+06	1.87687e+06	2.28032e+06	2.75867e+06	3.24359e+06	1.86184e+06	3.32344e+06	1.87256e+06	1.69107e+06	2.77746e+06	2.28173e+06	2.16107e+06	2.00438e+06	2.1181e+06	2.18227e+06	3.85215e+06	2.54846e+06	4.146e+06	2.8282e+06	2.20758e+06	2.98853e+06	2.51955e+06
High	VTIGLLFWDGR	[K].VTIGLLFWDGR.[G]		4.57062e-07	0.000386037	1	1	172	Q14624	Q14624 [843-853]		0	1276.7	11	2.42038e+06	4.20533e+06	3.06508e+06	6.26266e+06	4.00743e+06	4.26698e+06	2.73316e+06	3.6488e+06	3.04533e+06	4.7669e+06	5.0026e+06	2.58347e+06	2.85901e+06	3.8761e+06	3.59068e+06	4.52295e+06	3.11001e+06	3.6384e+06	6.20397e+06	3.22784e+06	3.37102e+06	4.37685e+06	2.53131e+06	5.09343e+06	5.5183e+06	7.17379e+06	5.08984e+06	4.39964e+06	2.14262e+06	4.71136e+06	3.33417e+06	3.21986e+06	2.6015e+06	4.55919e+06	5.607e+06
High	VTIMWTPPESAVTGYR	[K].VTIMWTPPESAVTGYR.[V]		1.04018e-06	0.000386037	1	1	135	P02751	P02751 [923-938]		0	1807.9	16	1.3184e+06	1.04341e+06	1.74555e+06	1.51931e+06	753095	1.40811e+06	1.92624e+06	2.37985e+06	2.04439e+06	1.99578e+06	1.27454e+06	1.54631e+06	1.06869e+06	1.18847e+06	983389	684256	1.30189e+06	1.56573e+06	720925	2.23429e+06	1.56823e+06	1.91114e+06	676913	1.8498e+06	1.09944e+06	1.29134e+06	561310	2.11569e+06	1.10817e+06	811093	1.79226e+06	1.86646e+06	1.95121e+06	1.16502e+06	1.3477e+06
High	VTIMWTPPESAVTGYR	[K].VTIMWTPPESAVTGYR.[V]	1xOxidation [M4]	9.91022e-08	0.000386037	1	1	144	P02751	P02751 [923-938]		0	1823.9	16	9.55421e+06	6.51972e+06	2.32936e+07	1.01614e+07	4.62926e+06	7.53217e+06	1.28952e+07	1.07987e+07	1.02351e+07	1.27717e+07	7.33148e+06	8.73776e+06	6.29195e+06	7.27267e+06	7.63536e+06	6.28314e+06	9.07548e+06	9.38689e+06	7.41228e+06	1.15138e+07	1.07937e+07	9.8432e+06	4.19289e+06	1.1395e+07	7.50536e+06	1.04086e+07	5.10717e+06	1.18012e+07	1.44258e+07	5.29145e+06	1.41528e+07	8.66719e+06	1.27752e+07	4.27096e+06	8.03003e+06
High	VTIMWTPPESAVTGYRVDVIPVNLPGEHGQR	[K].VTIMWTPPESAVTGYRVDVIPVNLPGEHGQR.[L]		0.00125635	0.000386037	1	1	4	P02751	P02751 [923-953]		1	3418.76	31			292415					349263		108578											114791	235427									161816	134292	377442
High	VTISVDTSK	[R].VTISVDTSK.[N]		0.00258783	0.000386037	3	4	579	P06331; P01825; P01824	P06331 [93-101]; P01825 [86-94]; P01824 [95-103]		0	949.52	9	5.42506e+07	5.69743e+07	5.94032e+07	5.0965e+07	3.61224e+07	5.4978e+07	4.57178e+07	6.81316e+07	5.55356e+07	6.343e+07	5.2228e+07	6.97337e+07	4.691e+07	5.07986e+07	3.52485e+07	3.45836e+07	4.70164e+07	2.01431e+07	2.48035e+07	4.53736e+07	6.85958e+07	5.68991e+07	5.19939e+07	3.58537e+07	4.63359e+07	4.93506e+07	7.32538e+07	2.6892e+07	4.19503e+07	4.95003e+07	7.02427e+07	3.97788e+07	4.50116e+07	5.63036e+07	7.92019e+07
High	VTITADKSTSTAYMELSSLR	[R].VTITADKSTSTAYMELSSLR.[S]	1xOxidation [M14]	0.00566449	0.000386037	1	1	1	P01742	P01742 [87-106]		1	2190.1	20	3.00167e+06	3.16448e+06	2.50802e+06	2.21203e+06	2.81215e+06	2.06354e+06	2.28673e+06	2.32457e+06	2.57862e+06	2.58857e+06	2.47267e+06	2.62293e+06	1.68233e+06	2.30254e+06	2.64955e+06	2.27709e+06	2.94819e+06	1.86608e+06	2.17125e+06	1.80261e+06	1.75004e+06	2.32467e+06	1.52451e+06	2.27189e+06	2.49603e+06	2.34161e+06	2.23864e+06	1.97116e+06	3.60636e+06	2.78017e+06	2.80444e+06	2.21689e+06	2.59296e+06	2.43209e+06	2.01699e+06
High	VTMSVDTSK	[R].VTMSVDTSK.[N]		0.00192168	0.000386037	1	1	61	A0A0C4DH34	A0A0C4DH34 [87-95]		0	967.476	9	7.32307e+07	6.53687e+07	1.23253e+08	5.21832e+07	6.81686e+07	6.07838e+07	6.97731e+07	4.78407e+07	6.11307e+07	6.67314e+07	6.00366e+07	6.71036e+07	5.19882e+07	6.2188e+07	6.97417e+07	5.52563e+07	5.92112e+07	6.25958e+07	5.42949e+07	5.87283e+07	5.37492e+07	5.16646e+07	7.06567e+07	4.97782e+07	5.692e+07	4.32218e+07	6.28451e+07	4.2421e+07	6.70773e+07	6.35495e+07	6.79119e+07	5.58043e+07	5.48704e+07	5.0109e+07	5.34783e+07
High	VTMTEDTSTDTAYMELSSLR	[R].VTMTEDTSTDTAYMELSSLR.[S]	1xOxidation [M3]	4.582e-12	0.000386037	1	1	4	A0A0C4DH33	A0A0C4DH33 [87-106]		0	2267.01	20
High	VTMTEDTSTDTAYMELSSLR	[R].VTMTEDTSTDTAYMELSSLR.[S]	2xOxidation [M3; M14]	8.57583e-07	0.000386037	1	1	9	A0A0C4DH33	A0A0C4DH33 [87-106]		0	2283	20		596859																																412436
High	VTIKPAPETEK	[K].VTIKPAPETEK.[R]		0.000730833	0.000386037	1	1	47	P01024	P01024 [1365-1375]		0	1212.68	11	5.73568e+06	3.46825e+06	3.97788e+06	5.5521e+06	5.37903e+06	5.33564e+06	6.03153e+06	3.81129e+06	6.65453e+06	5.77523e+06	6.45445e+06	4.78006e+06	4.86724e+06	4.29274e+06	5.43849e+06	4.70141e+06	6.80571e+06	5.2729e+06	9.49703e+06	5.6744e+06	8.26137e+06	5.95058e+06	2.33297e+06	3.77428e+06	5.31203e+06	6.29037e+06	8.13824e+06	6.00411e+06	7.19716e+06	6.14172e+06	7.16729e+06	4.75456e+06	6.25146e+06	5.68227e+06	3.67187e+06
High	VPSYTLILPSLELPVLHVPR	[R].VPSYTLILPSLELPVLHVPR.[N]		1.06919e-20	0.000386037	1	1	899	P04114	P04114 [3292-3311]		0	2243.32	20	1.83463e+07	4.09462e+07	3.37982e+07	4.92449e+07	3.39491e+07	5.19524e+07	3.57707e+07	4.67155e+07	3.50577e+07	4.32117e+07	3.67539e+07	2.32728e+07	6.77527e+07	5.12562e+07	7.15628e+07	7.25237e+07	2.7382e+07	3.72924e+07	6.82439e+07	3.6167e+07	4.43311e+07	4.63924e+07	3.27522e+07	4.01326e+07	3.59728e+07	5.61438e+07	5.55333e+07	6.14843e+07	2.96885e+07	3.57703e+07	3.44294e+07	4.67676e+07	2.26245e+07	5.87336e+07	6.12609e+07
High	VPQVSTPTLVEVSR	[K].VPQVSTPTLVEVSR.[SN]		5.05211e-12	0.000386037	2	2	3775	P02769; P02768	P02769 [438-451]; P02768 [439-452]		0	1511.84	14	1.24594e+09	1.23664e+09	1.62847e+09	1.18681e+09	1.28942e+09	1.30977e+09	1.45986e+09	1.04171e+09	1.24997e+09	1.14452e+09	1.62566e+09	1.65506e+09	1.55693e+09	1.54814e+09	1.30988e+09	1.41583e+09	1.61766e+09	1.47418e+09	1.09649e+09	1.27327e+09	1.24416e+09	1.1722e+09	1.78162e+09	1.2218e+09	1.28108e+09	1.22248e+09	1.30176e+09	1.29123e+09	1.5144e+09	1.49979e+09	1.62032e+09	1.64485e+09	1.54972e+09	1.2471e+09	1.28502e+09
High	VPQTDMTFR	[R].VPQTDMTFR.[H]	1xOxidation [M6]	0.00625709	0.000386037	1	1	423	P04114	P04114 [1216-1224]		0	1110.52	9	1.50885e+07	2.11293e+07	2.50098e+07	2.0021e+07	1.84078e+07	2.36247e+07	1.68908e+07	2.83909e+07	2.16812e+07	1.97164e+07	1.25362e+07	1.55912e+07	2.36914e+07	1.58022e+07	3.02937e+07	1.90406e+07	1.6306e+07	1.45028e+07	3.2395e+07	1.95035e+07	1.86562e+07	2.39121e+07	1.77141e+07	1.28574e+07	1.60739e+07	1.80869e+07	2.05395e+07	1.61851e+07	2.39058e+07	1.2861e+07	1.92338e+07	2.02974e+07	1.07241e+07	2.52211e+07	1.73404e+07
High	VGTGGIVGSK	[R].VGTGGIVGSK.[G]		0.00347057	0.000386037	1	1	86	A0A0B4J1Y8	A0A0B4J1Y8 [69-78]		0	874.499	10			1.9438e+06	987642	2.12591e+06	2.38485e+06	2.50061e+06	2.50585e+06	1.38923e+06	4.05014e+06	965007	1.26215e+06	4.03736e+06	1.66924e+06	2.87868e+06		3.70579e+06	1.33139e+06	2.80981e+06		2.48238e+06		1.94667e+06	655595	852329	2.45837e+06	1.73908e+06			1.54105e+06	813361	1.5952e+06	2.45886e+06	2.73632e+06	3.11765e+06
High	VGVETTKPSK	[K].VGVETTKPSK.[Q]		0.000111976	0.000386037	1	1	231	A0M8Q6	A0M8Q6 [51-60]		0	1045.59	10	1.37961e+06	241808	1.41662e+06	988535	2.03947e+06	524860	2.93482e+06	604936	374106	2.40153e+06	992270	1.06472e+06	891965	1.9702e+06	961144	1.22607e+06	1.61789e+06	32799.2	3.27089e+06	1.00017e+06	360477	903812	1.49786e+06	403651	633331	1.26972e+06	1.01427e+06	1.64886e+06	1.07541e+06	514795	375166	2.58101e+06	1.35682e+06	1.53579e+06	851668
High	VGYVSGWGQSDNFK	[R].VGYVSGWGQSDNFK.[L]		6.92257e-11	0.000386037	1	1	204	P00739	P00739 [220-233]		0	1543.72	14	6.37792e+06	1.36008e+07	1.24274e+07	1.15596e+07	7.71263e+06	1.68944e+07	6.1236e+06	1.06293e+07	3.16242e+06	7.56401e+06	4.5924e+06	1.39715e+07	1.68193e+07	1.49391e+07	6.83775e+06	1.89539e+07	1.27215e+07	7.67382e+06	1.01866e+07	1.23437e+07	1.11738e+07	1.22892e+07	1.93687e+07	4.40796e+06	7.15375e+06	1.41595e+07	1.25974e+07	9.2918e+06	1.39833e+07	1.24979e+07	1.17893e+07	7.9041e+06	6.92947e+06	1.21322e+07	4.96237e+06
High	VGYVSGWGR	[R].VGYVSGWGR.[N]		0.000730833	0.000386037	1	1	367	P00738	P00738 [278-286]		0	980.495	9	8.06611e+07	4.79833e+07	5.94791e+07	7.8148e+07	1.08471e+08	6.13088e+07	3.16657e+07	8.36633e+07	5.73689e+07	4.15236e+07	3.54647e+07	6.18128e+07	6.32495e+07	7.50826e+07	3.59677e+07	7.24835e+07	5.04777e+07	6.39445e+07	9.78058e+07	4.15324e+07	6.02982e+07	8.6126e+07	4.67165e+07	7.01088e+07	5.28167e+07	1.03422e+08	4.89713e+07	5.48804e+07	6.61719e+07	4.05318e+07	2.46719e+07	4.58824e+07	1.02194e+08	8.55082e+07	3.19685e+07
High	VHANPLLIDVVTYLVALIPEPSAQQLR	[R].VHANPLLIDVVTYLVALIPEPSAQQLR.[E]		2.43443e-11	0.000386037	1	1	40	P04114	P04114 [401-427]		0	2969.68	27	91450.1	196226		275441	106828	239214	179996	560797	153604	1.37961e+06					93455.9				1.0108e+06	147737	140110	42229.6				684342								84526.6
High	VHELIERYEVDQQIQVLMDK	[K].VHELIERYEVDQQIQVLMDK.[L]	1xOxidation [M18]	3.87534e-07	0.000386037	1	1	22	P04114	P04114 [2341-2360]		1	2501.27	20		164213	130317	519517	206094	695098	187252	147257	493008	138817	143296	89895.4	990240	309320	1.10302e+06	634553	656147	627363	844822	654724	763094	1.31661e+06		257657	365609	956459	1.07112e+06	1.21934e+06	1.05979e+06	221612	459053	690809	184331	1.08352e+06	836744
High	VHQYFNVELIQPGAVK	[K].VHQYFNVELIQPGAVK.[V]		1.05619e-17	0.000386037	1	1	863	P01024	P01024 [1463-1478]		0	1841.99	16	1.2804e+08	1.34441e+08	1.26537e+08	1.15385e+08	1.14126e+08	8.71138e+07	1.09054e+08	1.03642e+08	1.10159e+08	1.22164e+08	1.25418e+08	1.12031e+08	9.51643e+07	1.37756e+08	1.17438e+08	1.31058e+08	1.13432e+08	1.23044e+08	1.16978e+08	1.09944e+08	1.40094e+08	1.04898e+08	7.14897e+07	1.0311e+08	1.30465e+08	1.11244e+08	1.38544e+08	1.24422e+08	1.04993e+08	1.05179e+08	8.96157e+07	8.31847e+07	1.33758e+08	1.0215e+08	1.12258e+08
High	VKVEPLYELVTATDFAYSSTVR	[K].VKVEPLYELVTATDFAYSSTVR.[Q]		6.49683e-13	0.000386037	1	1	97	P07358	P07358 [465-486]		1	2488.3	22	821528	701787	784839	1.13056e+06	968150	622069	940951	882256	727225	837457	1.24472e+06	563678	739365	869011	892750	1.35347e+06	746629	1.12323e+06	1.43119e+06	1.08665e+06	810038	809032	825000	1.07257e+06	1.18802e+06	1.24168e+06	930590	948638	686976	1.21636e+06	793532	568699	996154	942912	1.30801e+06
High	VLDALQAIK	[K].VLDALQAIK.[T]		0.00485528	0.000386037	1	1	15	P00915	P00915 [161-169]		0	970.593	9	174085	153496			151752	260518			232704				353710	229395		378354	187619	305950	172833	4.09707e+06			194597	176638	164688		599211	239450	4.67298e+06	261846	227018	212282		629386
High	VLDELTLAR	[R].VLDELTLAR.[AT]		0.00166024	0.000386037	2	5	22	P02533; P08779	P02533 [224-232]; P08779 [226-234]		0	1029.59	9	382065	229444	412644	262271	961765	1.75579e+06	466448		368828	4.02142e+06	1.02907e+06	627862		502460	403310			408850			337258	416905	282075		71164.7	287945							281666
High	VLDELTLTK	[R].VLDELTLTK.[A]		0.00145672	0.000386037	1	1	181	P13645	P13645 [258-266]		0	1031.6	9	4.56593e+06	3.47053e+06	8.30527e+06	2.7984e+06	1.99478e+07	1.10662e+07	3.65984e+06	943526	4.40343e+06	7.4196e+06	1.46652e+07	7.13365e+06	2.13195e+06	5.51171e+06	3.05618e+06	1.3775e+06	2.36152e+06	5.80982e+06	6.7185e+06	3.1181e+06	4.14567e+06	4.42825e+06	3.22661e+06	2.59196e+06	981465	2.37705e+06	1.76357e+06	768392	1.58711e+06	754047	1.87775e+06	1.0647e+06	4.30811e+06	606719	1.6093e+06
High	VLDFEHFLPMLQTVAK	[K].VLDFEHFLPMLQTVAK.[N]		0.00665034	0.000386037	1	1	5	P60660	P60660 [64-79]		0	1888	16	45764.8	84076.8						60273.2				79825.8		121997			128015	210136				51141.7		79410.5				401512			101130	92591.6	160744
High	VLEMTGNIDEAEWEWK	[K].VLEMTGNIDEAEWEWK.[A]	1xOxidation [M4]	2.64513e-09	0.000386037	1	1	46	P06276	P06276 [557-572]		0	1965.89	16			429761	659269			460894		404763	440279			373858	465217	377531	164935			671522								323846	557293	405372			314314
High	VLFYVDSEK	[R].VLFYVDSEK.[L]		0.000221274	0.000386037	1	1	183	P10643	P10643 [315-323]		0	1099.57	9	1.23923e+07	1.43996e+07	9.64323e+06	1.30699e+07	9.53341e+06	9.81977e+06	1.04987e+07	8.23815e+06	1.01514e+07	9.04571e+06	1.14241e+07	1.10784e+07	8.81894e+06	9.6474e+06	5.64456e+06	1.06815e+07	1.66228e+07	1.05699e+07	7.41945e+06	7.78857e+06	9.76447e+06	8.71853e+06	1.50674e+07	1.14213e+07	8.27156e+06	1.12418e+07	8.67875e+06	9.23274e+06	1.05913e+07	9.6811e+06	1.59299e+07	1.24972e+07	1.26438e+07	8.60983e+06	9.86256e+06
High	VLGAFSDGLAHLDNLK	[K].VLGAFSDGLAHLDNLK.[G]		2.07717e-12	0.000386037	2	2	302	P02042; P68871	P02042 [68-83]; P68871 [68-83]		0	1669.89	16	1.17581e+07	1.40848e+07	6.45591e+06	7.93816e+06	1.42393e+07	1.96196e+07	1.39084e+07	8.20858e+06	1.33105e+07	1.27077e+07	1.11429e+07	5.9662e+06	2.03122e+07	1.29863e+07	1.41894e+07	1.68041e+07	1.21094e+07	1.86671e+07	1.29819e+07	2.49481e+08	1.89194e+07	9.83634e+06	1.90725e+07	1.18808e+07	1.25337e+07	1.0808e+07	4.15613e+07	1.5578e+07	2.09753e+08	2.42793e+07	1.2666e+07	1.73813e+07	6.60867e+06	4.54813e+07	1.63573e+07
High	VIGNMGQTMEQLTPELK	[R].VIGNMGQTMEQLTPELK.[S]		2.67768e-12	0.000386037	1	1	175	P04114	P04114 [491-507]		0	1888.95	17	722184	1.03658e+06	550848	1.3503e+06	1.07813e+06	2.22896e+06	1.23671e+06	3.51206e+06	1.94368e+06	1.66463e+06	909449	1.29602e+06	2.50132e+06	1.5776e+06	2.05383e+06	1.02194e+06	805851	1.03323e+06	788072	2.38253e+06	1.8259e+06	2.32775e+06	1.43599e+06	1.28169e+06	861573	497975	1.09114e+06	1.73637e+06	583008	987571	822831	1.99925e+06	1.10322e+06	3.05873e+06	1.53312e+06
High	VIGNMGQTMEQLTPELK	[R].VIGNMGQTMEQLTPELK.[S]	1xOxidation [M]	2.9166e-13	0.000386037	1	1	584	P04114	P04114 [491-507]		0	1904.95	17	3.22611e+06	5.83344e+06	3.36571e+06	5.21365e+06	4.81783e+06	7.15405e+06	4.03814e+06	9.18308e+06	6.29089e+06	4.2368e+06	4.28231e+06	6.02291e+06	8.29512e+06	6.99058e+06	8.89526e+06	6.25545e+06	4.88286e+06	5.00086e+06	5.03546e+06	6.40206e+06	7.48374e+06	9.98386e+06	5.75897e+06	6.17179e+06	4.69129e+06	4.66245e+06	6.07029e+06	7.73707e+06	5.08609e+06	4.37861e+06	4.939e+06	8.3356e+06	4.46109e+06	9.008e+06	5.12147e+06
High	VGSALFLSHNLK	[R].VGSALFLSHNLK.[F]		2.42227e-06	0.000386037	1	1	9	P29622	P29622 [139-150]		0	1285.73	12	1.48821e+06	1.11883e+06	1.13624e+06	1.06248e+06	1.76775e+06	1.22906e+06	1.11873e+06	1.52709e+06	1.68634e+06	1.15952e+06	1.49187e+06	1.51219e+06	1.78078e+06	1.49837e+06	1.46292e+06	1.25962e+06	1.37225e+06	1.628e+06	1.6225e+06	1.10861e+06	1.50185e+06	1.49923e+06	1.72063e+06	1.66336e+06	1.23122e+06	1.36462e+06	910571	1.4193e+06	1.48116e+06	1.25908e+06	1.24187e+06	2.50262e+06	2.52153e+06	1.05765e+06	1.15139e+06
High	VGSAADIPINISETDLSLLTATVVPPSGR	[K].VGSAADIPINISETDLSLLTATVVPPSGR.[E]		0.00103853	0.000386037	1	1	10	P21333	P21333 [1965-1993]		0	2893.55	29												96946.7					149306	320435										355547			65219.3
High	VGLSGMAIADVTLLSGFHALR	[K].VGLSGMAIADVTLLSGFHALR.[A]	1xOxidation [M6]	1.3126e-20	0.000386037	2	2	526	P0C0L4; P0C0L5	P0C0L4 [1478-1498]; P0C0L5 [1478-1498]		0	2144.15	21	3.80933e+06	9.98681e+06	4.09739e+06	1.00937e+07	5.05126e+06	7.61326e+06	4.18738e+06	5.9247e+06	3.73545e+06	1.13341e+07	6.96987e+06	2.51112e+06	4.18186e+06	5.95057e+06	5.68203e+06	4.38311e+06	4.57892e+06	9.03573e+06	8.54335e+06	3.66877e+06	9.37642e+06	7.54207e+06	1.15904e+06	5.26753e+06	1.18289e+07	5.17152e+06	7.21526e+06	6.08915e+06	2.18004e+06	8.73583e+06	4.46696e+06	5.4531e+06	3.84052e+06	9.84064e+06	7.59794e+06
High	VGLSGMAIADVTLLSGFHALR	[K].VGLSGMAIADVTLLSGFHALR.[A]		4.27931e-16	0.000386037	2	2	322	P0C0L4; P0C0L5	P0C0L4 [1478-1498]; P0C0L5 [1478-1498]		0	2128.16	21	4.51314e+06	7.26436e+06	3.77706e+06	1.44905e+07	4.89631e+06	1.10057e+07	6.33901e+06	6.92954e+06	4.79954e+06	1.63656e+07	7.95023e+06	3.02825e+06	5.02953e+06	8.4695e+06	7.07874e+06	5.00103e+06	4.10406e+06	1.22622e+07	7.64393e+06	4.26912e+06	9.47156e+06	7.54843e+06	2.1089e+06	6.09806e+06	9.53032e+06	6.97826e+06	7.33704e+06	9.84017e+06	1.64172e+06	6.30921e+06	3.85393e+06	8.14359e+06	3.94585e+06	9.22405e+06	3.89321e+07
High	VETVDRFQILTLWLPDSLTTWEIHGLSLSK	[R].VETVDRFQILTLWLPDSLTTWEIHGLSLSK.[T]		7.19837e-11	0.000386037	2	2	15	P0C0L4; P0C0L5	P0C0L4 [786-815]; P0C0L5 [786-815]		1	3497.87	30				79996				116775	34925.5	463009								73571.2	53991.5		72640.6					120507
High	VEYELSEEGDEPQYLDLPSTATSVNIPDLLPGR	[R].VEYELSEEGDEPQYLDLPSTATSVNIPDLLPGR.[K]		3.1153e-10	0.000386037	1	1	41	P02751	P02751 [752-784]		0	3646.76	33	336159	618829	1.72757e+06	822527		614995	732219	709052	681188	717794			479708				609367	780236		700895		631944		703141				626240			699716				546392
High	VEYELSEEGDEPQYLDLPSTATSVNIPDLLPGRK	[R].VEYELSEEGDEPQYLDLPSTATSVNIPDLLPGRK.[Y]		1.15046e-22	0.000386037	1	1	152	P02751	P02751 [752-785]		1	3774.86	34	3.00802e+06	3.41673e+06	9.20706e+06	5.4148e+06	2.28062e+06	4.65455e+06	5.83956e+06	3.86669e+06	4.67646e+06	4.36234e+06	3.56498e+06	2.82256e+06	4.17243e+06	3.58647e+06	3.83694e+06	3.52915e+06	5.36102e+06	4.63576e+06	4.47874e+06	6.79846e+06	6.28811e+06	4.61591e+06	1.51932e+06	4.8076e+06	4.01127e+06	6.44518e+06	3.69425e+06	6.764e+06	4.69781e+06	3.62259e+06	6.25085e+06	4.58633e+06	5.52797e+06	2.7106e+06	3.72026e+06
High	VFAIPPSFASIFLTK	[R].VFAIPPSFASIFLTK.[S]		2.37568e-09	0.000386037	2	2	623	P04220; P01871	P04220 [162-176]; P01871 [224-238]		0	1637.93	15	1.5577e+07	2.01311e+07	2.0629e+07	2.56885e+07	2.61925e+07	5.33707e+07	2.0398e+07	1.66429e+07	3.65656e+07	3.3239e+07	1.45598e+07	1.42813e+07	5.60157e+07	1.74325e+07	2.44835e+07	2.22867e+07	1.59011e+07	1.69802e+07	2.62469e+07	4.28852e+07	5.60159e+07	1.94915e+07	6.58056e+07	3.47759e+07	4.38976e+07	3.59224e+07	3.36988e+07	2.53846e+07	4.46851e+07	5.77278e+07	2.50838e+07	1.49669e+07	2.10338e+07	4.30693e+07	3.84327e+07
High	VFDEFKPLVEEPQNLIK	[K].VFDEFKPLVEEPQNLIK.[Q]		3.90967e-17	0.000386037	1	1	21432	P02768	P02768 [397-413]		0	2045.1	17	3.44365e+09	3.25699e+09	6.54498e+09	2.25553e+09	4.95228e+09	3.43115e+09	6.15401e+09	4.06346e+09	2.74144e+09	5.95458e+09	3.27835e+09	2.71722e+09	5.08806e+09	3.07079e+09	3.48963e+09	4.36839e+09	3.24787e+09	2.78587e+09	2.58098e+09	5.0516e+09	4.22727e+09	3.80717e+09	3.66287e+09	4.03783e+09	4.62619e+09	4.2588e+09	2.80242e+09	4.11695e+09	2.53587e+09	2.96619e+09	5.0785e+09	5.04598e+09	2.82098e+09	6.79754e+09	4.98797e+09
High	VFQYIDLHQDEFVQTLK	[K].VFQYIDLHQDEFVQTLK.[E]		1.40883e-11	0.000386037	1	1	157	Q96KN2	Q96KN2 [38-54]		0	2123.08	17	1.20379e+06	2.12708e+06	1.31374e+06	1.28953e+06	935471	1.23759e+06	1.52569e+06	1.85242e+06	1.21444e+06	1.50414e+06	543489	1.24835e+06	1.38877e+06	1.19699e+06	1.25242e+06	1.47085e+06	636912	917603	1.71431e+06	1.53504e+06	1.63128e+06	850892	1.04539e+06	1.08376e+06	1.85844e+06	1.08542e+06	1.29011e+06	1.45738e+06	1.34511e+06	2.01644e+06	1.4173e+06	1.38127e+06	1.04816e+06	1.51705e+06	1.3087e+06
High	VFSLQWGEVK	[R].VFSLQWGEVK.[L]		0.00167382	0.000386037	1	1	158	P05156	P05156 [481-490]		0	1192.64	10	9.02179e+06	7.57268e+06	8.05918e+06	9.70058e+06	7.50567e+06	6.54934e+06	6.13038e+06	8.22561e+06	8.16985e+06	6.70391e+06	7.57223e+06	8.49976e+06	6.72748e+06	8.2232e+06	8.58009e+06	7.45876e+06	7.21167e+06	7.70085e+06	9.2956e+06	6.99997e+06	6.84391e+06	9.50107e+06	5.03143e+06	7.54299e+06	9.19489e+06	6.84858e+06	6.75668e+06	7.63809e+06	6.83366e+06	6.64717e+06	6.82317e+06	6.62267e+06	7.05617e+06	6.85328e+06	7.26577e+06
High	VFSNGADLSGVTEEAPLK	[K].VFSNGADLSGVTEEAPLK.[L]		3.67808e-14	0.000386037	1	1	993	P01009	P01009 [335-352]		0	1833.92	18	7.09056e+08	5.76127e+08	6.71657e+08	6.59386e+08	6.62241e+08	3.23409e+08	5.51058e+08	4.99643e+08	5.72681e+08	4.76421e+08	6.46748e+08	6.54289e+08	5.77357e+08	7.14259e+08	5.45681e+08	5.63578e+08	6.74905e+08	7.40486e+08	5.41575e+08	6.17327e+08	4.70385e+08	5.88721e+08	7.45704e+08	7.23427e+08	6.75889e+08	4.45299e+08	5.31871e+08	5.70934e+08	7.31301e+08	7.32681e+08	7.60697e+08	6.23644e+08	7.71056e+08	4.51771e+08	7.22356e+08
High	VIGNMGQTMEQLTPELK	[R].VIGNMGQTMEQLTPELK.[S]	2xOxidation [M5; M9]	2.58143e-15	0.000386037	1	1	344	P04114	P04114 [491-507]		0	1920.94	17	1.43524e+07	1.33066e+07	2.22228e+07	1.10952e+07	1.08827e+07	1.28698e+07	9.54939e+06	1.47117e+07	1.326e+07	1.02268e+07	9.46689e+06	1.072e+07	1.50806e+07	1.23502e+07	1.28017e+07	1.31613e+07	1.17754e+07	9.40011e+06	1.35793e+07	7.48928e+06	1.19221e+07	1.5237e+07	1.09144e+07	9.21849e+06	9.48183e+06	1.29085e+07	1.01035e+07	1.29162e+07	1.62714e+07	9.28292e+06	1.22729e+07	1.28826e+07	8.87072e+06	1.61634e+07	1.21217e+07
High	VFVGEEDPEAESVTLR	[R].VFVGEEDPEAESVTLR.[V]		2.52342e-05	0.000386037	1	1	4	Q86UX7	Q86UX7 [20-35]		0	1776.87	16
High	VGAIPANALDDGQWSQGLISAAR	[K].VGAIPANALDDGQWSQGLISAAR.[M]		1.51419e-06	0.000386037	1	1	9	Q9Y490	Q9Y490 [2376-2398]		0	2310.18	23			361615									271771							226788						224777	177191		279905	204238						304091
High	VGDTLNLNLR	[R].VGDTLNLNLR.[A]		1.69469e-07	0.000386037	2	2	536	P0C0L4; P0C0L5	P0C0L4 [485-494]; P0C0L5 [485-494]		0	1114.62	10	8.61313e+07	4.87952e+07	5.79383e+07	9.62279e+07	4.29163e+07	5.33389e+07	3.29266e+07	5.67563e+07	5.2801e+07	5.56398e+07	6.18014e+07	7.31779e+07	6.29096e+07	7.47545e+07	5.81725e+07	5.25581e+07	8.52425e+07	1.04966e+08	4.59942e+07	3.19016e+07	7.40689e+07	8.26701e+07	1.53711e+07	6.22427e+07	1.0376e+08	3.39745e+07	6.07162e+07	7.45834e+07	5.48051e+07	5.41851e+07	5.79994e+07	6.87657e+07	5.97242e+07	5.71999e+07	4.27992e+07
High	VGDTYERPK	[R].VGDTYERPK.[D]		6.95657e-05	0.000386037	1	1	213	P02751	P02751 [108-116]		0	1064.54	9	6.60501e+06	4.93081e+06	1.51637e+07	6.80391e+06	2.82795e+06	4.93923e+06	6.96406e+06	7.43046e+06	6.61486e+06	5.95058e+06	5.20428e+06	6.02851e+06	4.54899e+06	3.12795e+06	4.80704e+06	3.1358e+06	5.6998e+06	5.06076e+06	5.31971e+06	8.0455e+06	5.55759e+06	5.10182e+06	2.98571e+06	5.51498e+06	4.41538e+06	6.43153e+06	3.59749e+06	6.34152e+06	7.29235e+06	4.49088e+06	7.09311e+06	6.5767e+06	7.01483e+06	2.54179e+06	4.39488e+06
High	VGEVLNSIFFELEADER	[R].VGEVLNSIFFELEADER.[E]		0.00103853	0.000386037	1	1	1	P01019	P01019 [421-437]		0	1966.98	17		58803.9	239805																55934.6	109605				46637.2	88102.5	73480.2		49764.8		79864
High	VGEYSLYIGR	[R].VGEYSLYIGR.[H]		2.30913e-06	0.000386037	1	1	303	P02743	P02743 [87-96]		0	1156.6	10	1.75428e+07	1.43246e+07	2.13927e+07	2.29274e+07	1.82773e+07	1.1673e+07	1.22512e+07	2.22237e+07	2.39186e+07	2.61349e+07	1.43986e+07	2.74275e+07	2.50582e+07	2.46154e+07	2.9949e+07	1.82689e+07	1.63888e+07	1.34795e+07	1.59033e+07	1.03135e+07	2.95114e+07	2.43887e+07	1.32782e+07	1.96698e+07	2.49263e+07	1.81094e+07	9.83108e+06	2.15584e+07	1.66598e+07	1.39921e+07	2.27958e+07	2.16981e+07	1.78351e+07	2.27954e+07	1.61087e+07
High	VGFYESDVMGR	[R].VGFYESDVMGR.[G]		1.14545e-06	0.000386037	1	1	432	P01023	P01023 [705-715]		0	1259.57	11	3.52611e+07	3.7451e+07	1.77013e+07	2.49325e+07	3.00238e+07	2.71592e+07	3.6472e+07	2.98224e+07	4.78234e+07	2.28178e+07	5.37872e+07	3.81637e+07	3.31932e+07	3.0236e+07	1.96033e+07	2.65994e+07	3.22981e+07	4.51349e+07	1.13037e+07	3.75763e+07	2.56376e+07	3.02306e+07	5.32887e+07	3.93648e+07	3.39322e+07	1.63675e+07	2.38208e+07	3.46736e+07	3.28661e+07	3.68213e+07	5.12234e+07	4.9985e+07	3.87341e+07	3.64695e+07	3.82387e+07
High	VGFYESDVMGR	[R].VGFYESDVMGR.[G]	1xOxidation [M9]	3.85175e-05	0.000386037	1	1	1277	P01023	P01023 [705-715]		0	1275.57	11	2.50475e+08	2.13203e+08	1.77841e+08	2.01892e+08	2.03816e+08	1.36965e+08	1.94733e+08	1.27769e+08	2.39347e+08	1.17676e+08	2.37615e+08	1.65052e+08	1.47938e+08	1.34747e+08	1.44205e+08	1.57829e+08	2.01959e+08	2.06755e+08	1.41202e+08	1.94734e+08	1.06766e+08	1.18738e+08	1.97261e+08	1.77873e+08	1.6074e+08	1.21939e+08	1.47702e+08	1.352e+08	2.36224e+08	1.57545e+08	2.56519e+08	1.56577e+08	1.52305e+08	1.89397e+08	1.67336e+08
High	VGLSDAFVVVHR	[K].VGLSDAFVVVHR.[I]		1.64743e-05	0.000386037	1	1	116	Q6UX71	Q6UX71 [278-289]		0	1298.72	12	353534	370281	271081	329698	431572	334390	410894	325883	322446	417623	367120	254840	438691	232854	316959	286430	401960	349693	376925	294884	365641	354803	423444	429047	359936	255789	320659	253093	311163	272898	250314	384008	367111	303106	365095
High	VGAHAGEYGAEALER	[K].VGAHAGEYGAEALER.[M]		1.71275e-11	0.000386037	1	1	601	P69905	P69905 [18-32]		0	1529.73	15	2.11349e+07	1.93914e+07	8.81476e+06	1.12066e+07	2.20945e+07	2.67612e+07	1.73262e+07	1.08183e+07	2.10176e+07	1.29696e+07	1.4359e+07	1.11023e+07	2.55809e+07	1.87055e+07	2.18111e+07	2.12019e+07	1.50074e+07	2.35584e+07	1.75555e+07	2.70239e+08	2.26236e+07	1.55529e+07	2.37086e+07	1.71082e+07	1.66454e+07	1.48958e+07	5.538e+07	1.93083e+07	3.27974e+08	2.8047e+07	2.0555e+07	2.09556e+07	8.56166e+06	5.81611e+07	1.75989e+07
High	VLLDGVQNPR	[K].VLLDGVQNPR.[A]		3.29582e-05	0.000386037	1	1	1276	P01024	P01024 [306-315]		0	1110.63	10	2.95698e+08	2.83636e+08	2.87512e+08	1.08145e+08	371755	1.0373e+08	2.20406e+08	2.01463e+08	2.46973e+08	2.05482e+08	2.21856e+08	1.44381e+08	1.94286e+08	1.3632e+08	1.2071e+08	1.19764e+08	1.2733e+08	2.32133e+08	2.41775e+08	1.50315e+08	2.33108e+08	2.34494e+08	6.45036e+07	2.04026e+08	2.41966e+08	9.53428e+07	2.3931e+08	1.14771e+08	1.67634e+08	2.04331e+08	2.10203e+08	2.01929e+08	1.24248e+08	1.96283e+08	1.14325e+08
High	VLLDQLGTTISFER	[R].VLLDQLGTTISFER.[I]		4.87039e-11	0.000386037	1	1	502	P04114	P04114 [2296-2309]		0	1591.87	14	1.06703e+07	2.38974e+07	2.14779e+07	2.63171e+07	2.09694e+07	3.089e+07	1.51526e+07	2.041e+07	1.73788e+07	1.74212e+07	1.55037e+07	1.162e+07	2.95122e+07	2.41001e+07	3.64918e+07	2.33866e+07	2.37072e+07	2.00298e+07	2.67716e+07	1.90502e+07	1.62037e+07	2.01364e+07	1.8569e+07	1.77874e+07	1.47412e+07	1.74571e+07	2.33383e+07	2.49516e+07	1.88059e+07	1.79742e+07	1.75292e+07	1.86758e+07	1.21664e+07	2.1743e+07	2.2477e+07
High	VLLDWINDVLVEER	[K].VLLDWINDVLVEER.[I]		7.67009e-09	0.000386037	1	1	2	Q9HBI1	Q9HBI1 [92-105]		0	1712.92	14																		80436.8										172186		56321.4			51169.4
High	VNQNLVYESGSLNFSK	[R].VNQNLVYESGSLNFSK.[L]		2.7573e-12	0.000386037	1	1	160	P04114	P04114 [2970-2985]		0	1798.9	16	2.1705e+06	5.97752e+06	3.88019e+06	3.95832e+06	5.97132e+06	4.55e+06	2.65301e+06	7.38337e+06	5.30663e+06	5.07735e+06	5.63991e+06	2.60565e+06	8.36631e+06	5.27722e+06	6.04826e+06	5.16955e+06	5.74195e+06	5.17519e+06	4.51782e+06	4.76948e+06	4.94096e+06	8.04444e+06	3.49841e+06	3.37534e+06	3.64963e+06	2.7239e+06	4.38162e+06	6.82265e+06	3.93034e+06	1.50749e+06	4.14301e+06	6.43245e+06	2.06449e+06	5.31428e+06	5.29804e+06
High	VNSFFSTFK	[K].VNSFFSTFK.[E]		9.96884e-05	0.000386037	1	1	444	P06727	P06727 [351-359]		0	1076.54	9	2.84606e+07	2.8454e+07	2.20196e+07	1.80331e+07	4.05322e+07	2.22104e+07	2.54835e+07	2.95294e+07	2.59516e+07	2.84622e+07	1.82412e+07	3.33638e+07	2.69681e+07	2.77051e+07	2.72945e+07	2.58986e+07	1.68575e+07	2.33601e+07	2.77397e+07	2.72039e+07	2.34335e+07	1.78357e+07	2.52403e+07	2.52508e+07	3.80502e+07	1.67937e+07	1.98494e+07	2.37384e+07	3.1659e+07	1.57157e+07	1.39504e+07	3.44221e+07	2.72025e+07	2.70404e+07	2.71981e+07
High	VNVDAVGGEALGR	[K].VNVDAVGGEALGR.[L]		3.79658e-09	0.000386037	1	1	27	P02042	P02042 [19-31]		0	1256.66	13		389739			433461	585082			621852				546343		321306	395928		683191	333523	7.83071e+06	736321	345892		341604	313104		1.6412e+06	458669	1.06208e+07	559666				1.45837e+06
High	VNVDEVGGEALGR	[K].VNVDEVGGEALGR.[L]		1.85646e-10	0.000386037	1	1	383	P68871	P68871 [19-31]		0	1314.66	13	2.19957e+07	2.23479e+07	9.19655e+06	1.28441e+07	2.41869e+07	3.38014e+07	2.08843e+07	1.13204e+07	2.33366e+07	1.371e+07	1.68218e+07	1.07373e+07	3.2915e+07	2.30306e+07	1.80193e+07	2.43011e+07	1.77909e+07	2.60126e+07	1.52018e+07	2.64258e+08	2.57353e+07	1.84335e+07	2.86508e+07	1.94694e+07	1.76443e+07	1.45751e+07	5.62774e+07	2.24083e+07	3.57482e+08	3.07921e+07	2.19584e+07	2.45212e+07	1.09068e+07	5.9231e+07	2.30393e+07
High	VNWEEEAASGLLTSLK	[K].VNWEEEAASGLLTSLK.[D]		3.51132e-13	0.000386037	1	1	534	P04114	P04114 [4056-4071]		0	1746.89	16	6.49899e+06	8.29524e+06	6.77033e+06	7.81555e+06	7.12535e+06	9.30168e+06	6.78428e+06	9.7743e+06	7.54284e+06	8.83645e+06	6.13427e+06	6.89374e+06	1.50192e+07	8.72219e+06	1.34514e+07	1.03527e+07	7.76448e+06	7.30257e+06	8.79517e+06	7.61896e+06	1.00145e+07	1.25928e+07	8.45733e+06	7.09467e+06	7.19307e+06	9.4886e+06	9.94083e+06	1.22828e+07	9.95333e+06	5.81327e+06	7.05241e+06	9.23509e+06	4.71572e+06	1.29663e+07	9.5777e+06
High	VPANLENVGFEVQTAEDDLK	[R].VPANLENVGFEVQTAEDDLK.[T]		8.3959e-20	0.000386037	1	1	271	P13671	P13671 [232-251]		0	2188.08	20	4.02637e+06	3.00013e+06	3.20543e+06	4.74477e+06	3.93317e+06	3.48526e+06	3.26206e+06	2.92764e+06	3.39749e+06	3.79368e+06	3.43125e+06	3.68561e+06	2.41581e+06	3.90778e+06	1.67567e+06	4.22358e+06	4.33059e+06	3.41214e+06	3.52715e+06	2.61818e+06	3.44051e+06	4.83012e+06	3.87599e+06	4.52648e+06	3.82489e+06	4.30532e+06	4.05591e+06	3.82393e+06	2.35388e+06	5.03127e+06	2.78667e+06	2.70046e+06	3.03056e+06	3.54286e+06	4.61e+06
High	VPAPPSPQPATYTCVVSHEDSR	[R].VPAPPSPQPATYTCVVSHEDSR.[T]	1xCarbamidomethyl [C14]	0.00213449	0.000386037	1	1	2	P01880	P01880 [342-363]		0	2395.13	22																			249520
High	VPEARPNSMVVEHPEFLK	[R].VPEARPNSMVVEHPEFLK.[A]		2.78474e-07	0.000386037	1	1	104	P06396	P06396 [44-61]		0	2079.07	18	579611	727462		719790	763387	765282	1.59469e+06	1.20883e+06	1.0461e+06	799934	1.05336e+06	1.20239e+06	1.01585e+06	917632	635358	676976	942721	1.21897e+06	603649	848686	1.57051e+06	1.75333e+06	1.76766e+06	1.21868e+06	659064	967125	710746	1.38817e+06	740830	792168	792489	1.69803e+06	1.21742e+06	1.73048e+06	1.14042e+06
High	VNKDDEEFIESNK	[K].VNKDDEEFIESNK.[M]		2.50682e-11	0.000386037	1	1	934	P00450	P00450 [945-957]		1	1566.73	13	1.04859e+08	6.37231e+07	1.11828e+08	1.01155e+08	5.60743e+07	6.82281e+07	7.17609e+07	7.51707e+07	6.53662e+07	5.94822e+07	8.13974e+07	7.69095e+07	6.90319e+07	7.34582e+07	6.32379e+07	8.12855e+07	7.3921e+07	7.25037e+07	9.59156e+07	9.86544e+07	6.81672e+07	7.0295e+07	7.43876e+07	7.59903e+07	9.70417e+07	9.00619e+07	8.06092e+07	5.31897e+07	1.00764e+08	1.21035e+08	9.03578e+07	7.31442e+07	6.84474e+07	5.54678e+07	7.70387e+07
High	VPEARPNSMVVEHPEFLK	[R].VPEARPNSMVVEHPEFLK.[A]	1xOxidation [M9]	3.16002e-07	0.000386037	1	1	259	P06396	P06396 [44-61]		0	2095.06	18	8.11603e+06	7.62738e+06	6.8703e+06	5.99965e+06	8.99183e+06	8.29107e+06	1.2259e+07	7.92566e+06	8.79145e+06	7.41828e+06	8.27821e+06	8.86215e+06	7.9038e+06	8.08018e+06	7.43011e+06	8.56165e+06	9.61703e+06	9.80577e+06	9.10753e+06	6.84597e+06	9.64214e+06	8.54241e+06	1.06855e+07	8.44957e+06	6.08719e+06	1.05253e+07	8.12313e+06	7.84732e+06	1.00045e+07	8.16004e+06	9.95764e+06	1.07584e+07	8.79533e+06	1.238e+07	8.73979e+06
High	VPFDAATLHTSTAMAAQHGMDDDGTGQK	[R].VPFDAATLHTSTAMAAQHGMDDDGTGQK.[Q]	1xOxidation [M]	4.72975e-11	0.000386037	1	1	243	P06396	P06396 [420-447]		0	2889.28	28	1.29493e+07	1.04865e+07	8.04466e+06	8.1158e+06	9.98033e+06	1.16391e+07	1.35875e+07	1.07066e+07	1.13582e+07	8.04092e+06	9.34181e+06	1.25328e+07	9.37246e+06	1.13178e+07	7.72688e+06	7.84386e+06	1.0729e+07	1.05574e+07	6.28316e+06	5.06148e+06	9.12665e+06	1.14518e+07	1.84066e+07	9.6046e+06	7.09323e+06	5.66805e+06	7.68373e+06	8.80386e+06	6.7316e+06	7.39639e+06	9.17875e+06	1.12551e+07	9.29633e+06	1.20843e+07	1.02304e+07
High	VPFDAATLHTSTAMAAQHGMDDDGTGQK	[R].VPFDAATLHTSTAMAAQHGMDDDGTGQK.[Q]	2xOxidation [M14; M20]	8.68732e-10	0.000386037	1	1	269	P06396	P06396 [420-447]		0	2905.27	28	1.57627e+07	1.9985e+07	2.17906e+07	1.52669e+07	2.35618e+07	1.82558e+07	2.62498e+07	1.39454e+07	1.78148e+07	1.65004e+07	1.8775e+07	1.89827e+07	1.62873e+07	1.71089e+07	2.30438e+07	2.1349e+07	2.54098e+07	1.894e+07	2.45241e+07	1.57575e+07	1.75585e+07	1.90237e+07	2.36901e+07	1.85058e+07	1.53942e+07	1.98735e+07	2.18484e+07	1.22231e+07	2.45982e+07	1.45765e+07	1.94178e+07	1.76291e+07	1.48022e+07	2.10161e+07	1.83811e+07
High	VPGTSTSATLTGLTR	[R].VPGTSTSATLTGLTR.[G]		2.69075e-10	0.000386037	1	1	289	P02751	P02751 [2150-2164]		0	1461.79	15	4.56537e+06	5.12073e+06	1.54694e+07	5.40061e+06	2.54129e+06	4.00448e+06	8.66873e+06	6.43875e+06	6.52564e+06	5.69756e+06	5.06091e+06	4.05438e+06	3.61875e+06	4.10641e+06	2.48859e+06	4.15866e+06	5.89265e+06	6.65605e+06	3.19285e+06	5.36581e+06	6.20232e+06	4.72156e+06	2.1853e+06	4.24016e+06	3.06391e+06	8.07006e+06	2.14581e+06	5.99131e+06	6.01011e+06	3.16323e+06	8.13094e+06	1.11672e+07	1.0631e+07	2.0074e+06	3.70483e+06
High	VPHDLDMLLR	[K].VPHDLDMLLR.[A]		0.0036959	0.000386037	1	1	52	P55058	P55058 [295-304]		0	1208.65	10	303729	250721	133644	125811	243979	361169	242644	193872	217403	313482	182506	276834	404781	181152	194424		209180	224620		247098	186715	278614	263819	327899			149606	173556	127461	153103	92113.7	152181	352056	156040	186594
High	VPLLLSEPINIIDALEMR	[K].VPLLLSEPINIIDALEMR.[D]		2.03704e-16	0.000386037	1	1	380	P04114	P04114 [2026-2043]		0	2036.15	18	1.51549e+06	5.91061e+06	2.36531e+06	5.74133e+06	4.64139e+06	8.66587e+06	3.27732e+06	7.03273e+06	4.21066e+06	5.53234e+06	4.36201e+06	1.75088e+06	7.12751e+06	5.88125e+06	7.44299e+06	5.21876e+06	2.09483e+06	3.32764e+06	3.957e+06	4.60038e+06	6.86138e+06	7.99724e+06	2.91084e+06	3.43075e+06	3.18618e+06	4.22008e+06	4.64115e+06	6.85589e+06	1.29394e+06	2.57261e+06	2.6812e+06	3.45296e+06	1.69857e+06	9.42594e+06	7.77267e+06
High	VPLLLSEPINIIDALEMR	[K].VPLLLSEPINIIDALEMR.[D]	1xOxidation [M17]	1.88388e-12	0.000386037	1	1	671	P04114	P04114 [2026-2043]		0	2052.14	18	5.44282e+06	3.39657e+07	1.48801e+07	3.07932e+07	2.3701e+07	4.17931e+07	1.52037e+07	2.8607e+07	1.86279e+07	3.54506e+07	1.99569e+07	9.69527e+06	2.91819e+07	2.83928e+07	4.00972e+07	3.12901e+07	1.59113e+07	2.18028e+07	3.12259e+07	2.10598e+07	2.99567e+07	3.4686e+07	1.89854e+07	2.0023e+07	2.44981e+07	3.16634e+07	3.3967e+07	3.66812e+07	1.75593e+07	1.83356e+07	2.33315e+07	1.82949e+07	9.54741e+06	3.66611e+07	3.80536e+07
High	VPMMLQDQEHHWYLHDR	[R].VPMMLQDQEHHWYLHDR.[Y]	2xOxidation [M3; M4]	2.81196e-07	0.000386037	1	1	143	P29622	P29622 [243-259]		0	2267.01	17	322187	1.22157e+06	1.22254e+06	474912	1.57482e+06	1.38142e+06	1.01299e+06	1.30863e+06	1.39799e+06	1.57141e+06	1.08168e+06	1.85723e+06	1.21103e+06	909432	1.01972e+06	1.40306e+06	1.41911e+06	1.3403e+06	1.80584e+06	1.50332e+06	1.87912e+06	1.15905e+06	1.39193e+06	1.64381e+06	1.57434e+06	1.32248e+06	1.25504e+06	1.22163e+06	1.82923e+06	599629	996485	1.29116e+06	1.55619e+06	1.09214e+06	1.27877e+06
High	VPQTDMTFR	[R].VPQTDMTFR.[H]		0.00532659	0.000386037	1	1	139	P04114	P04114 [1216-1224]		0	1094.53	9		1.68383e+06	977062	1.98834e+06	2.01935e+06	3.53718e+06	1.87841e+06	4.29698e+06	3.13214e+06	2.27374e+06	1.5547e+06	2.19253e+06	2.72978e+06	2.74361e+06	3.70645e+06	1.93681e+06	1.53974e+06	2.00469e+06	1.81434e+06	2.98636e+06	2.37298e+06	3.66943e+06	2.26198e+06	1.91063e+06	1.5997e+06	1.16396e+06	2.13875e+06	2.83074e+06	1.76481e+06	1.53166e+06	1.34121e+06	3.64334e+06	1.7039e+06	4.41668e+06	2.92502e+06
High	VPFDAATLHTSTAMAAQHGMDDDGTGQK	[R].VPFDAATLHTSTAMAAQHGMDDDGTGQK.[Q]		1.39174e-12	0.000386037	1	1	114	P06396	P06396 [420-447]		0	2873.28	28	2.04317e+06	1.66408e+06	874225	1.55816e+06	2.92826e+06	3.51447e+06	3.82878e+06	3.85697e+06	3.49127e+06	2.51271e+06	2.7118e+06	3.9807e+06	4.26599e+06	3.68788e+06	2.31596e+06	1.48411e+06	2.95161e+06	3.50984e+06	1.29276e+06	3.37423e+06	4.43259e+06	3.98559e+06	5.96489e+06	3.38299e+06	1.89244e+06	1.23895e+06	1.99587e+06	3.54463e+06	1.31673e+06	2.48706e+06	1.97999e+06	5.75788e+06	4.20643e+06	3.40526e+06	3.1654e+06
High	VVLHPNYSQVDIGLIK	[K].VVLHPNYSQVDIGLIK.[L]		7.14597e-14	0.000386037	1	1	754	P00738	P00738 [236-251]		0	1795.01	16	5.69969e+07	2.20266e+07	4.01714e+07	5.63296e+07	6.03213e+07	4.12861e+07	2.49357e+07	4.68127e+07	3.3469e+07	2.83638e+07	2.21107e+07	5.59026e+07	5.31082e+07	5.84492e+07	3.18969e+07	4.91764e+07	3.90176e+07	3.15706e+07	4.9161e+07	3.43489e+07	3.1072e+07	4.94892e+07	4.18501e+07	7.20648e+07	3.33929e+07	3.88517e+07	3.15167e+07	4.77575e+07	3.6468e+07	3.31597e+07	1.93586e+07	1.3736e+07	4.47872e+07	4.45998e+07	5.08469e+07
High	VNHVTLSQPK	[R].VNHVTLSQPK.[I]		0.0120009	0.000386037	1	1	228	P61769	P61769 [102-111]		0	1122.63	10	3.79323e+06	4.53463e+06	2.32737e+06	2.35461e+06	2.02348e+06	3.52665e+06	4.82177e+06	3.05831e+06	7.50576e+06	4.13831e+06	3.34615e+06	3.34892e+06	3.03469e+06	1.95121e+06	2.98418e+06	2.50018e+06	2.97819e+06	2.5479e+06	3.36551e+06	2.67313e+06	3.45413e+06	3.09335e+06	3.27463e+06	2.61424e+06	3.68789e+06	2.65724e+06	3.25643e+06	2.46538e+06	2.90502e+06	2.37871e+06	5.30274e+06	3.54587e+06	3.61188e+06	3.81314e+06	3.53531e+06
High	VNEPSILEMSR	[R].VNEPSILEMSR.[G]	1xOxidation [M9]	0.00235076	0.000386037	1	1	18	O14791	O14791 [321-331]		0	1290.64	11	3.20148e+06	5.03603e+06	5.49282e+06	4.32607e+06	4.27309e+06	5.95485e+06	3.18268e+06	3.57001e+06	2.42764e+06	5.25215e+06	2.77032e+06	3.82366e+06	3.63441e+06	4.16767e+06	3.90638e+06	2.62839e+06	4.49658e+06	4.33155e+06	6.60525e+06	4.00545e+06	4.51349e+06	3.95424e+06	4.79655e+06	2.82568e+06	1.65585e+06	5.50388e+06	1.86817e+06	4.74968e+06	7.25479e+06	1.41577e+06	4.83381e+06	1.40385e+06	4.24969e+06	2.21491e+06	3.71459e+06
High	VILGAHQEVNLEPHVQEIEVSR	[K].VILGAHQEVNLEPHVQEIEVSR.[L]		2.22974e-23	0.000386037	1	1	779	P00747	P00747 [635-656]		0	2496.32	22	3.02186e+07	4.3753e+07	3.66012e+07	3.70518e+07	4.4153e+07	2.78787e+07	3.86659e+07	3.45692e+07	4.03858e+07	3.87169e+07	4.28659e+07	3.22462e+07	5.30716e+07	4.51421e+07	4.53923e+07	5.47005e+07	3.19765e+07	4.03855e+07	3.43566e+07	4.66369e+07	5.08159e+07	5.63704e+07	4.64777e+07	4.83469e+07	5.95819e+07	5.91447e+07	3.50073e+07	5.08853e+07	4.67546e+07	6.21036e+07	4.13449e+07	4.05032e+07	4.7497e+07	3.98063e+07	4.61252e+07
High	VILGAHQEVNLESHVQEIEVSR	[K].VILGAHQEVNLESHVQEIEVSR.[L]		3.19234e-12	0.000386037	1	1	25	P08519	P08519 [4382-4403]		0	2486.3	22		1.24551e+06		295034	1.26787e+06		1.25598e+06			431603	2.327e+06	2.97437e+06	179098	130743	1.39471e+06		158911	1.09548e+06	273954	807895												3.54183e+06	401431		657317
High	VLMSVLNDNSR	[K].VLMSVLNDNSR.[D]	1xOxidation [M3]	5.60276e-07	0.000386037	1	1	135	P06681	P06681 [304-314]		0	1263.64	11	1.71529e+06	1.6623e+06	2.29511e+06	1.77417e+06	1.33045e+06	1.38817e+06	1.84625e+06	1.3269e+06	1.66586e+06	1.57805e+06	1.80419e+06	1.53866e+06	1.42047e+06	1.74382e+06	1.77083e+06	1.84538e+06	1.69145e+06	1.55626e+06	2.04869e+06	1.56022e+06	1.59796e+06	1.31684e+06	941905	1.40071e+06	1.27806e+06	1.8873e+06	1.57441e+06	1.45612e+06	1.9031e+06	1.80776e+06	1.88586e+06	1.75429e+06	1.98425e+06	1.55561e+06	1.61637e+06
High	VINLPLDSMAAPWETGDTFPDVVAIAPDVR	[R].VINLPLDSMAAPWETGDTFPDVVAIAPDVR.[A]		2.95209e-07	0.000386037	1	1	2	Q96PD5	Q96PD5 [137-166]		0	3209.62	30	211485	227173	229210	348777	471176	304603	263934		249437	321913		286430		342844	296184		282542	376012	327270	421840	394256	414329	353246		282994	236521	451216	475414	220615		344580	282416	250715	409888	606121
High	VINLPLDSMAAPWETGDTFPDVVAIAPDVR	[R].VINLPLDSMAAPWETGDTFPDVVAIAPDVR.[A]	1xOxidation [M9]	2.97405e-09	0.000386037	1	1	45	Q96PD5	Q96PD5 [137-166]		0	3225.61	30	951630	963795		767292	1.05704e+06		1.3678e+06	1.0267e+06	668727		1.53986e+06	1.05675e+06	1.33798e+06	1.15149e+06	1.35179e+06	1.58982e+06	1.47132e+06	1.23337e+06	1.22381e+06	1.21425e+06	702849	862939	1.29992e+06	1.33402e+06	1.05549e+06		1.33407e+06	1.29155e+06	720048	736059	1.48443e+06	686663	794414	1.24853e+06	1.24645e+06
High	VLNYVDWIK	[K].VLNYVDWIK.[K]		0.000154211	0.000386037	1	1	78	P00736	P00736 [690-698]		0	1149.63	9
High	VLQLTSWDEDAWASK	[R].VLQLTSWDEDAWASK.[D]		1.23721e-06	0.000386037	1	1	2	P18206	P18206 [247-261]		0	1748.85	15
High	VLSALQAVQGLLVAQGR	[K].VLSALQAVQGLLVAQGR.[A]		4.55974e-14	0.000386037	1	1	181	P01019	P01019 [180-196]		0	1723.02	17	804535	1.51759e+06	2.74335e+06	991059	1.0544e+06	1.14485e+06	1.17821e+06	907761	1.14612e+06	485804	632682	734739	1.3425e+06	694027	1.7261e+06	1.81265e+06	1.12719e+06	1.13998e+06	1.36786e+06	2.5644e+06	1.00779e+06	1.01511e+06	1.29645e+06	1.13204e+06	4.71362e+06	1.91738e+06	1.3088e+06	1.38013e+06	2.17847e+06	3.70411e+06	1.47896e+06	1.07408e+06	769202	1.58241e+06	427775
High	VNGVLTALPVSVADGR	[R].VNGVLTALPVSVADGR.[I]		3.22576e-06	0.000386037	1	1	138	Q9Y6R7	Q9Y6R7 [1756-1771]; [2957-2972]; [4158-4173]		0	1567.88	16	561197	626144	668616	383067	762240	717615	547189	706203	918062	795490	320006	386061	602705	386885	570587	577541	679011	284955	261793	466269	940549	672005	415224	543496	456184	428108	676601	447102	434854	281860	517664	424098	474317	429041	499904
High	VLSLAQEQVGGSPEK	[K].VLSLAQEQVGGSPEK.[L]		4.06523e-09	0.000386037	2	2	43	P0C0L4; P0C0L5	P0C0L4 [1085-1099]; P0C0L5 [1085-1099]		0	1541.82	15	1.28343e+08	7.32034e+07	7.59333e+07	1.00627e+08	6.35555e+07	7.40117e+07	4.98264e+07	7.73439e+07	7.3935e+07	7.04323e+07	5.90162e+07	8.47121e+07	6.09531e+07	8.37418e+07	5.71199e+07	5.866e+07	8.54673e+07	9.96258e+07	5.85344e+07	4.47921e+07	6.31901e+07	8.53053e+07	2.82847e+07	7.13726e+07	1.02704e+08	3.65635e+07	5.40963e+07	6.84217e+07	5.36864e+07	5.60103e+07	5.31313e+07	6.54946e+07	6.15314e+07	6.2893e+07	5.15298e+07
High	VLVDHFGYTK	[K].VLVDHFGYTK.[D]		0.000144939	0.000386037	1	1	340	P04114	P04114 [733-742]		0	1178.62	10	9.68952e+06	1.51362e+07	1.58847e+07	1.45269e+07	1.65216e+07	1.88482e+07	1.1089e+07	2.08633e+07	1.7112e+07	1.40667e+07	1.02201e+07	1.29514e+07	2.23451e+07	1.46873e+07	2.27843e+07	1.64607e+07	1.27646e+07	1.13926e+07	1.7078e+07	1.20775e+07	1.52351e+07	2.08434e+07	1.27166e+07	1.37187e+07	1.11371e+07	1.33478e+07	1.50663e+07	1.66643e+07	1.70925e+07	1.24278e+07	1.54897e+07	1.69105e+07	1.14812e+07	2.59478e+07	1.56053e+07
High	VIVIPVGIGPHANLK	[K].VIVIPVGIGPHANLK.[Q]		2.05933e-07	0.000386037	1	1	4	P04275	P04275 [1409-1423]		0	1526.94	15			1.3574e+06
High	VLVQNAAGSQEK	[K].VLVQNAAGSQEK.[L]		0.000901363	0.000386037	1	1	53	Q9Y490	Q9Y490 [2032-2043]		0	1243.66	12	323100	310743	304243	275949	226205	122512	203035	262016	213431	175801	173458	384998	192487	213604	216450	172988	424859	598854	254577		244560	227832	200553	251096	158443	238803	214718	652907		195159	404223	402218	401097		246211
High	VLYDAEISQIHQSVTDTNVILSMDNSR	[K].VLYDAEISQIHQSVTDTNVILSMDNSR.[N]		1.12815e-14	0.000386037	1	1	12	P35908	P35908 [315-341]		0	3048.49	27	97661	238273	234908	113657	1.68408e+06	707783	133806		178602	272223	915852	138861		300048				195803	388059	123008	194419	116230					120643
High	VLYDAEISQIHQSVTDTNVILSMDNSR	[K].VLYDAEISQIHQSVTDTNVILSMDNSR.[N]	1xOxidation [M23]	3.35203e-08	0.000386037	1	1	26	P35908	P35908 [315-341]		0	3064.49	27	793249	808065	1.47996e+06	608153	7.29576e+06	2.40951e+06	291478		537661	492049	2.84899e+06	585559		897773				691679	1.48631e+06			205251		291436
High	VMYTQYEDESFTK	[K].VMYTQYEDESFTK.[H]	1xOxidation [M2]	7.11076e-08	0.000386037	1	1	23	P12259	P12259 [394-406]		0	1656.71	13
High	VNDDIIVNWVNETLR	[K].VNDDIIVNWVNETLR.[E]		0.00256723	0.000386037	1	1	6	P13796	P13796 [516-530]		0	1799.93	15	116385	125030		73805.8					135520		129770			129163		151034	121008	154760										103660		176964	115533
High	VNEPSILEMSR	[R].VNEPSILEMSR.[G]		3.79266e-06	0.000386037	1	1	142	O14791	O14791 [321-331]		0	1274.64	11	1.61785e+06	1.53493e+06	1.50675e+06	1.44174e+06	1.22717e+06	2.59576e+06	1.12191e+06	1.82623e+06	985723	1.81664e+06	994492	1.76859e+06	1.70531e+06	2.53021e+06	1.74457e+06	626581	1.66383e+06	2.02734e+06	993084	2.57868e+06	1.7711e+06	1.91921e+06	2.15493e+06	1.06259e+06	552136	1.47627e+06	627775	2.27562e+06	1.7234e+06	391428	1.5033e+06	612279	2.14986e+06	886999	1.5526e+06
High	VISTITNNIQQIIEIEDTFETLR	[K].VISTITNNIQQIIEIEDTFETLR.[A]		1.57353e-06	0.000386037	1	1	38	Q15582	Q15582 [235-257]		0	2690.42	23	578061	595945	474018	579092	546058	417252	452683	350662	415233	527258	225425	480598	520775	562740	585784	727549	550452	478982	742196	365120	502836	681652	383620	494254	640647	741336	615528	751375	417971	444317	573319	414948	414414	699048	342640
High	VVLSSGSGPGLDLPLVLGLPLQLK	[K].VVLSSGSGPGLDLPLVLGLPLQLK.[L]		5.82415e-07	0.000386037	1	1	296	P04278	P04278 [286-309]		0	2372.42	24	640040	830009	1.84714e+06	1.43629e+06	711451	789329	938681	636579	595360	779857	813952	238089	639977	715781	519125	760827	433941	927088	416931	2.25705e+06	639550	514271	1.60935e+06	2.09503e+06	2.27338e+06	644764	816178	329848	1.86646e+06	2.46686e+06	1.24347e+06	577372	380590	1.13916e+06	821888
High	VVLVSLQSGYLFIQTDK	[K].VVLVSLQSGYLFIQTDK.[T]		1.06394e-14	0.000386037	1	1	470	P01024	P01024 [120-136]		0	1910.06	17	4.33968e+06	1.07192e+07	6.89702e+06	1.18126e+07	9.01897e+06	1.17454e+07	9.83719e+06	1.0548e+07	9.47359e+06	2.51018e+07	1.23545e+07	6.37671e+06	8.04022e+06	1.57808e+07	1.19887e+07	1.44408e+07	1.19811e+07	1.44303e+07	1.76929e+07	9.84271e+06	1.97826e+07	1.20934e+07	7.46385e+06	1.18762e+07	1.35759e+07	1.962e+07	2.03203e+07	1.81715e+07	6.09081e+06	1.41766e+07	1.15648e+07	1.12376e+07	1.06364e+07	1.19758e+07	1.54244e+07
High	VVNNSPQPQNVVFDVQIPK	[K].VVNNSPQPQNVVFDVQIPK.[G]		1.82504e-13	0.000386037	1	1	686	P19823	P19823 [94-112]		0	2122.13	19	3.60148e+07	2.34165e+07	3.20896e+07	3.61781e+07	2.19089e+07	3.00062e+07	2.95521e+07	2.94931e+07	3.16493e+07	2.67548e+07	2.70589e+07	3.875e+07	2.68554e+07	2.77228e+07	3.35511e+07	2.60397e+07	3.04834e+07	2.92362e+07	2.88596e+07	3.11007e+07	2.27667e+07	2.1675e+07	3.44718e+07	3.05786e+07	2.53884e+07	2.5841e+07	2.81179e+07	3.20972e+07	2.69283e+07	3.08665e+07	2.83979e+07	2.49826e+07	3.10494e+07	2.12921e+07	3.00067e+07
High	YLSDHSFLVSQGDREQAPNLVYMVTGNPASDEIK	[R].YLSDHSFLVSQGDREQAPNLVYMVTGNPASDEIK.[R]	1xOxidation [M23]	2.51672e-06	0.000386037	1	1	35	P04275	P04275 [1584-1617]		1	3796.81	34	248705	562778	564541	614654	441928		577965	442345	185978	609448	275261	397110		172169		230680	290672	227722	182980	453355	253192	175342	143368	428406		955765		633749	389952		366799		790136		284500
High	YLSYTLNPDLIR	[R].YLSYTLNPDLIR.[K]		2.50023e-05	0.000386037	1	1	2	P15144	P15144 [844-855]		0	1467.78	12		217848				73806.3		108564	111391					79120.2	65382.9	233905			102015			97379.8	80415		95387.2		90487.5						107806	81328.4	134045
High	YLTLNTESTR	[K].YLTLNTESTR.[I]		0.00103853	0.000386037	1	1	115	P06276	P06276 [528-537]		0	1197.61	10	2.17381e+06	1.81834e+06	1.91667e+06	2.26681e+06	1.92205e+06	2.1497e+06	2.03855e+06	1.78474e+06	2.08738e+06	1.82412e+06	1.91779e+06	1.14106e+06	2.00387e+06	2.52225e+06	2.47444e+06	1.06144e+06	1.70462e+06	2.33773e+06	2.86891e+06	1.65185e+06	1.77553e+06	1.95512e+06	1.83747e+06	1.39852e+06	1.27035e+06	1.47593e+06	2.42221e+06	2.14531e+06	2.07739e+06	1.62887e+06	1.75749e+06	2.22509e+06	1.54129e+06	2.36767e+06	1.23827e+06
High	YIVNVYQISEDGEQSLILSTSQTTAPDAPPDTTVDQVDDTSIVVR	[K].YIVNVYQISEDGEQSLILSTSQTTAPDAPPDTTVDQVDDTSIVVR.[W]		0.000850099	0.000386037	1	1	9	P02751	P02751 [786-830]		0	4880.38	45
High	YLYHGQTLETLGGK	[K].YLYHGQTLETLGGK.[K]		0.000406257	0.000386037	1	1	2	Q15582	Q15582 [448-461]		0	1579.81	14
[truncated: 2,170 more rows]
[truncated: 716 more columns]
